# Supplementary material
Source: publisher figshare collection journal article supplement (https://acs.figshare.com/ndownloader/files/14986457)

# Highly Enantioselective Cross-Electrophile Aryl-Alkenylation of Unactivated Alkenes

Zhi-Xiong Tian, Jin-Bao Qiao, Guang-Li Xu, Xiaobo Pang, Liangliang Qi, Wei-Yuan Ma, Zhen-Zhen Zhao, Jicheng Duan, Yun-Fei Du, Peifeng Su, Xue-Yuan Liu, Xing-Zhong Shu\*

State Key Laboratory of Applied Organic Chemistry (SKLAOC), College of Chemistry and Chemical Engineering, Lanzhou University, 222 South Tianshui Road, Lanzhou, 730000, China.

## Table of Contents

|    |                                                                                   |     |
|----|-----------------------------------------------------------------------------------|-----|
| 1. | General Information.....                                                          | S2  |
| 2. | Optimization of Reaction Parameters.....                                          | S3  |
| 3. | Synthesis of Substrates.....                                                      | S6  |
| 4. | Ni-catalyzed Enantioselective Cross-electrophile Aryl-alkenylation of Alkene..... | S22 |
| 5. | Mechanistic Investigation.....                                                    | S66 |
| 6. | Crystallographic Data for Compound 3z.....                                        | S70 |
| 7. | References.....                                                                   | S79 |
| 8. | Copies of NMR Spectra.....                                                        | S82 |

## 1. General Information

All reactions were carried out under an atmosphere of argon in sealed tube with magnetic stirring. Dry DMF, THF, CH<sub>2</sub>Cl<sub>2</sub> were purified using a solvent-purification system that contained activated alumina and molecular sieves. Other solvents were dried and purified according to the procedure from “Purification of Laboratory Chemicals”.<sup>1</sup>

Nickel catalysts, reductants were purchased from Acros, Alfa Aesar, Aldrich, Ark Pharm, and Strem. Other chemicals were purchased from TCI, Adamas, and Energy chemicals, and were directly used without further purifications.

<sup>1</sup>H and <sup>13</sup>C NMR spectra were collected on a Bruker AVANCE III 400MHz, JEOL JNM-ECS 400M and Agilent-NMR-inova 600 MHz spectrometer at room temperature. <sup>1</sup>H NMR spectra were reported in parts per million (ppm) downfield of tetramethylsilane (TMS) and were referenced to the signal of TMS (0 ppm). <sup>13</sup>C NMR spectra were reported in ppm relative to residual CHCl<sub>3</sub> (77.00 ppm). Coupling constants, *J*, are reported in hertz (Hz). <sup>19</sup>F NMR spectra were also collected on Bruker AVANCE III 400 MHz spectrometers and Agilent-NMR-inova 600 MHz spectrometer at room temperature. Melting points were determined on a microscopic apparatus. IR spectra were collected using Bruker-TENSOR 27 spectrometer and Agilent Technologies Cary 630 FTIR, and only major peaks were reported in cm<sup>-1</sup>. HRMS was performed on Bruker Apex II FT-ICR mass instrument (ESI). GC analysis was performed on Thermo Scientific TRACE 1300. GC-MS data was collected on Thermo Scientific TRACE DSQ GC-MS. The enantiomeric excess (ee) of the products was determined by chiral HPLC (Thermo Scientific UltiMate 3000) using Daicel CHIRALCEL® columns and Daicel CHIRALPAK® columns (internal diameter 4.6 mm, column length 250 mm, particle size 5 μm). Optical rotations were measured on an AUTOPOL IV Automatic polarimeter (Rudolph Research Analytical). The X-RAY was measured on Agilent SUPERNOVA. Thin layer chromatography was carried out using XINNUO SGF254 TLC plates. Flash chromatography was performed using XINNUO silica gel (200-300 mesh).

## 2. Optimization of Reaction Parameters

### General Procedure

The procedure was conducted in an argon-filled glove box. To a reaction tube equipped with a magnetic stir bar was charged with catalyst (10 mol %, 0.010 mmol), **L1** (14 mol %, 3.8 mg, 0.014 mmol), reductant (4 equiv, 0.4 mmol), and solvent (0.5 mL). The reaction mixture was stirred for 5 min. Substrates **1a** (27.4 mg, 0.1 mmol) and **2a** (23.0 mg, 0.1 mmol) were then added. The reaction tube was sealed with a rubber septum, and removed from the glove box. The reaction mixture was stirred at appropriate temperature for 24 h. The reaction mixture was diluted with ethyl acetate (10 mL), washed with water, brine, and dried over anhydrous Na<sub>2</sub>SO<sub>4</sub>. A 0.2 mL of solution was collected, diluted with ethyl acetate (2 mL), and analyzed by GC. The yield was determined versus the internal standard (dodecane). The rest solution was concentrated under the reduced pressure, and part of the residue was purified by thin layer chromatography on silica gel. The enantiomeric excess (ee) of the products was determined by chiral HPLC.

**Table S1.** Effect of reductant, solvent and temperature<sup>a</sup>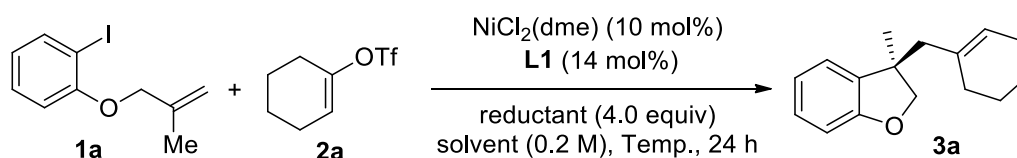

| entry | reductant | solvent                | temperature | yield (%) | ee (%) |
|-------|-----------|------------------------|-------------|-----------|--------|
| 1     | Mn        | DMF                    | rt.         | 59        | 93     |
| 2     | Zn        | DMF                    | rt.         | trace     | -      |
| 3     | Mg        | DMF                    | rt.         | 0         | -      |
| 4     | Mn        | $\text{CH}_3\text{CN}$ | rt.         | 0         | -      |
| 5     | Mn        | DMSO                   | rt.         | 48        | 90     |
| 6     | Mn        | DMA                    | rt.         | 52        | 91     |
| 7     | Mn        | Toluene                | rt.         | 0         | -      |
| 8     | Mn        | THF                    | rt.         | trace     | -      |
| 9     | Mn        | Dioxane                | rt.         | 0         | -      |
| 10    | Mn        | DMF/THF(4/1)           | rt.         | 60        | 94     |
| 11    | Mn        | DMF/THF(3/2)           | rt.         | 63        | 94     |
| 12    | Mn        | DMF/THF(1/1)           | rt.         | 67        | 95     |
| 13    | Mn        | DMF/THF(2/3)           | rt.         | 55        | 95     |
| 14    | Mn        | DMF/THF(1/4)           | rt.         | 31        | 94     |
| 15    | Mn        | DMF/THF(1/1)           | 0 °C        | trace     | -      |
| 16    | Mn        | DMF/THF(1/1)           | 10 °C       | 34        | 95     |
| 17    | Mn        | DMF/THF(1/1)           | 40 °C       | 60        | 95     |
| 18    | Mn        | DMF/THF(1/1)           | 60 °C       | 54        | 93     |

<sup>a</sup>**1a** (0.1 mmol) and **2a** (0.1 mmol) was used. The yields were determined by GC analysis with doecane as an internal standard. The ees were determined by chiral HPLC.



**Table S2.** Effect of catalyst<sup>a</sup>

| <div><div><div>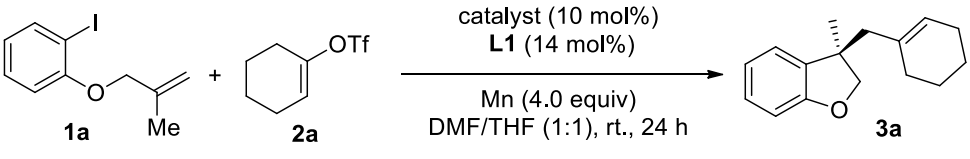</div><div><div>1a</div><div>2a</div><div>3a</div></div></div></div> |                          |                      |        |
|-----------------------------------------------------------------------------------------------------------------------------------------------------------------------|--------------------------|----------------------|--------|
| entry                                                                                                                                                                 | catalyst                 | yield (%)            | ee (%) |
| 1                                                                                                                                                                     | NiF <sub>2</sub>         | 0                    | -      |
| 2                                                                                                                                                                     | NiCl <sub>2</sub>        | 30                   | 91     |
| 3                                                                                                                                                                     | NiBr <sub>2</sub>        | 69                   | 97     |
| 4                                                                                                                                                                     | NiI <sub>2</sub>         | 79 (77) <sup>b</sup> | 98     |
| 5                                                                                                                                                                     | NiCl <sub>2</sub> (dme)  | 67                   | 95     |
| 6                                                                                                                                                                     | Ni(cod) <sub>2</sub>     | 68                   | 95     |
| 7                                                                                                                                                                     | NiCl <sub>2</sub> (dppp) | 45                   | 94     |
| 8                                                                                                                                                                     | NiCl <sub>2</sub> (dppf) | 0                    | -      |
| 9                                                                                                                                                                     | CoCl <sub>2</sub>        | 0                    | -      |
| 10                                                                                                                                                                    | CoBr <sub>2</sub>        | 0                    | -      |
| 11                                                                                                                                                                    | PdCl <sub>2</sub>        | 0                    | -      |
| 12                                                                                                                                                                    | CuCl <sub>2</sub>        | 0                    | -      |

<sup>a</sup>**1a** (0.1 mmol) and **2a** (0.1 mmol) was used. The yields were determined by GC analysis with doecane as an internal standard. The ees were determined by chiral HPLC. <sup>b</sup>Isolated yield.

### 3. Synthesis of Substrates

#### 3.1 Synthesis of Aryl Iodide tethered Alkenes

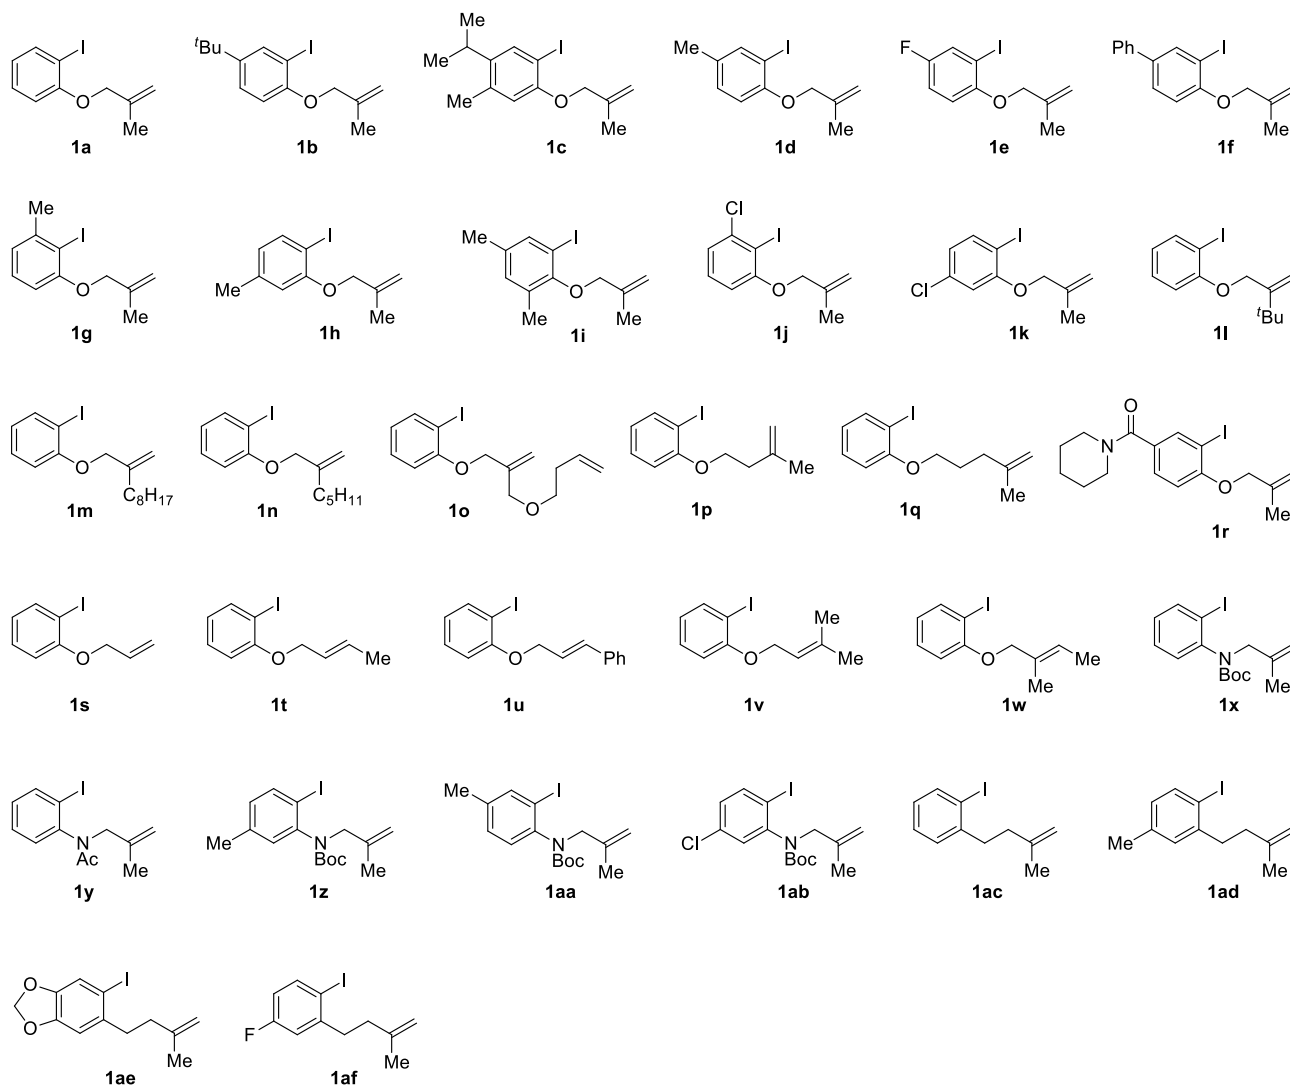

Known compounds **1a**,<sup>2</sup> **1b**,<sup>2</sup> **1d**,<sup>3</sup> **1e**,<sup>4</sup> **1f**,<sup>5</sup> **1h**,<sup>5</sup> **1k**,<sup>6</sup> **1y**,<sup>2</sup> were prepared according to the literature procedure in ref.2. Known compound **1n**,<sup>7</sup> **1p**,<sup>2</sup> **1s**,<sup>8</sup> **1t**,<sup>9</sup> **1u**,<sup>10</sup> **1v**,<sup>11</sup> **1w**,<sup>12</sup> was prepared according to the literature procedure in ref.13. Known compound **1x**,<sup>14</sup> was prepared according to the literature procedure in ref.14, Known compound **1ac**,<sup>15</sup> was prepared according to the literature procedure in ref.15. The preparation of new compounds, and their characterization data are provided as follows.

### General procedure A:

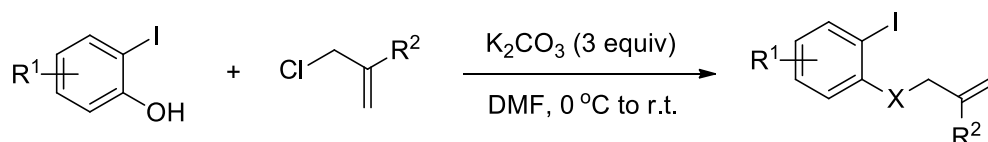

These compounds were synthesized according to the literature procedure.<sup>2</sup> To a solution of phenol (10.0 mmol) in DMF (30.0 mL) was added  $K_2CO_3$  (4.15 g, 30.0 mmol) at 0 °C, followed by slowly addition of allyl halide (10.0 mmol) after 20 min. The reaction mixture was allowed to warm to room temperature and stirred overnight. The reaction was quenched with water (40.0 mL), and extracted with ethyl acetate (3 × 30.0 mL). The combined organic layers were washed with saturated aqueous  $Na_2S_2O_3$ , brine, dried over anhydrous  $Na_2SO_4$  and concentrated under reduced pressure. The residue was purified by flash chromatography on silica gel to give the product.

### General procedure B:

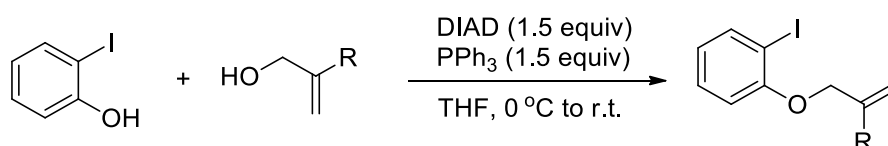

These compounds were synthesized according to the literature procedure.<sup>13</sup> To a solution of alcohol (10.0 mmol) and phenol (10.0 mmol) in THF (30.0 mL) was added  $PPh_3$  (2.62 g, 10.0 mmol) at 0 °C, followed by slowly addition of diisopropyl azodicarboxylate (DIAD, 2.02 g, 10.0 mmol) after 20 min under argon. The reaction mixture was allowed to warm to room temperature and stirred overnight. The reaction was quenched with water (40.0 mL), and extracted with ethyl acetate (3 × 30.0 mL). The combined organic layers were washed with saturated aqueous  $Na_2S_2O_3$ , brine, dried over anhydrous  $Na_2SO_4$  and concentrated under reduced pressure. The residue was purified by flash chromatography on silica gel to give the product.

### 1-Iodo-5-isopropyl-4-methyl-2-((2-methylallyl)oxy)benzene (1c)

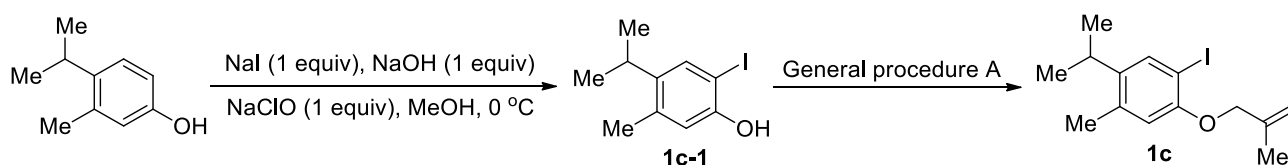

**Step 1:** Compound **1c-1** was synthesized according to the literature procedure.<sup>16</sup> To a solution of phenol (10.0 mmol) in MeOH (30.0 mL) at 0 °C was added  $NaI \cdot 2H_2O$  (1.86 g, 10.0 mmol) and

NaOH (0.40 g, 10.0 mmol), followed by slowly addition of NaClO (15.0 ml, 10.0 mmol, 5% aqueous solution,) after 20 min. The reaction mixture was stirred overnight at the same temperature. The MeOH was removed under reduced pressure, and water (30.0 mL) was added. The reaction mixture was neutralized with aqueous HCl (2.0 M) to pH < 7, and extracted with ethyl acetate (3 × 20.0 mL). The combined organic layers were washed with water, saturated aqueous Na<sub>2</sub>S<sub>2</sub>O<sub>3</sub>, brine, dried over anhydrous Na<sub>2</sub>SO<sub>4</sub>, and concentrated under reduced pressure. The residue was purified by flash chromatography on silica gel to give 2-iodo-4-isopropyl-5-methylphenol (**1c-1**).

1.55 g, 56% yield, white solid, mp: 40-42 °C, R<sub>f</sub> = 0.3 (silica gel, petroleum ether/ethyl acetate = 10:1).

**<sup>1</sup>H NMR (400 MHz, CDCl<sub>3</sub>):** δ 7.43 (s, 1 H), 6.78 (s, 1 H), 5.05 (s, 1 H), 3.03-2.97 (m, 1 H), 2.25 (s, 3 H), 1.18 (d, *J* = 6.8 Hz, 6 H).

**<sup>13</sup>C NMR (100 MHz, CDCl<sub>3</sub>):** δ 152.3, 141.6, 137.7, 134.3, 116.6, 82.4, 28.6, 23.3, 19.0.

**IR (neat, cm<sup>-1</sup>):** 2963, 1481, 1459, 1398, 1299, 1269, 1200, 880, 762, 725.

**HRMS (ESI):** [M+H]<sup>+</sup> calcd for C<sub>10</sub>H<sub>14</sub>IO 277.0084, found 277.0093.

**Step 2:** Compound **1c** was prepared from 2-iodo-4-isopropyl-5-methylphenol (**1c-1**, 1.38 g, 5.0 mmol) and 3-chloro-2-methylprop-1-ene (0.45 g, 5.0 mmol) according to the General procedure A. 1.39 g, 84% yield, colorless oil, R<sub>f</sub> = 0.7 (silica gel, petroleum ether).

**<sup>1</sup>H NMR (400 MHz, CDCl<sub>3</sub>):** δ 7.56 (s, 1 H), 6.57 (s, 1 H), 5.19 (s, 1 H), 5.00 (s, 1 H), 4.43 (s, 2 H), 3.03-2.96 (m, 1 H), 2.27 (s, 3 H), 1.86 (s, 3 H), 1.18 (d, *J* = 6.8 Hz, 6 H).

**<sup>13</sup>C NMR (100 MHz, CDCl<sub>3</sub>):** δ 154.8, 141.4, 140.5, 136.4, 135.7, 114.4, 112.6, 83.3, 72.6, 28.6, 23.3, 19.5, 19.4.

**IR (neat, cm<sup>-1</sup>):** 2963, 2872, 1654, 1591, 1490, 1252, 1053, 1030, 902, 716.

**HRMS (ESI):** [M+H]<sup>+</sup> calcd for C<sub>14</sub>H<sub>20</sub>IO 331.0553, found 331.0562.

### 2-Iodo-1-methyl-3-((2-methylallyl)oxy)benzene (**1g**)

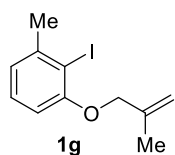

This compound was prepared from 2-iodo-3-methylphenol (2.34 g, 10.0 mmol) and 3-chloro-2-methylprop-1-ene (0.91 g, 10.0 mmol) according to General procedure A. 22.5g, 78% yield, colorless oil, R<sub>f</sub> = 0.7 (silica gel, petroleum ether).

**<sup>1</sup>H NMR (400 MHz, CDCl<sub>3</sub>):** δ 7.15 (t, *J* = 8.0 Hz, 1 H), 6.87 (d, *J* = 8.0 Hz, 1 H), 6.60 (d, *J* = 8.0 Hz, 1 H), 5.22 (s, 1 H), 5.01 (s, 1 H), 4.47 (s, 2 H), 2.47 (s, 3 H), 1.88 (s, 3 H).

**<sup>13</sup>C NMR (100 MHz, CDCl<sub>3</sub>):** δ 157.2, 143.5, 140.4, 128.5, 122.4, 112.8, 109.2, 93.6, 72.7, 28.8, 19.5.

**IR (neat, cm<sup>-1</sup>):** 3290, 2918, 1959, 1650, 1565, 1450, 1260, 1057, 902, 764.3

**HRMS (ESI):** [M+H]<sup>+</sup> calcd for C<sub>11</sub>H<sub>14</sub>IO 289.0084, found 289.0091.

**1-Iodo-3,5-dimethyl-2-((2-methylallyl)oxy)benzene (1i)**

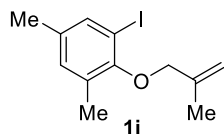

This compound was prepared from 2-iodo-4,6-dimethylphenol (2.48 g, 10.0 mmol) and 3-chloro-2-methylprop-1-ene (0.91 g, 10.0 mmol) according to General procedure A.

2.48 g, 82% yield, colorless oil, R<sub>f</sub> = 0.7 (silica gel, petroleum ether).

**<sup>1</sup>H NMR (400 MHz, CDCl<sub>3</sub>):** δ 7.43 (s, 1 H), 6.94 (s, 1 H), 5.19 (s, 1 H), 5.01 (s, 1 H), 4.23 (s, 2 H), 2.29 (s, 3 H), 2.23 (s, 3 H), 1.93 (s, 3 H).

**<sup>13</sup>C NMR (100 MHz, CDCl<sub>3</sub>):** δ 154.6, 141.2, 137.3, 135.6, 132.2, 131.8, 113.0, 91.8, 76.04, 20.2, 19.9, 17.0.

**IR (neat, cm<sup>-1</sup>):** 3077, 2973, 2858, 1653, 1469, 1272, 1123, 1041, 995, 853.

**HRMS (ESI):** [M+H]<sup>+</sup> calcd for C<sub>12</sub>H<sub>16</sub>IO 303.0240, found 303.0247.

**1-Chloro-2-iodo-3-((2-methylallyl)oxy)benzene (1j)**

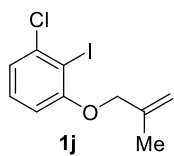

This compound was prepared from 3-chloro-2-iodophenol (2.54 g, 10.0 mmol) and 3-chloro-2-methylprop-1-ene (0.91 g, 10.0 mmol) according to General procedure A.  
22.5g, 78% yield, colorless oil, R<sub>f</sub> = 0.7 (silica gel, petroleum ether).

**<sup>1</sup>H NMR (400 MHz, CDCl<sub>3</sub>):** δ 7.20 (t, *J* = 8.0 Hz, 1 H), 7.08 (d, *J* = 8.0 Hz, 1 H), 6.65 (d, *J* = 8.0 Hz, 1 H), 5.20 (s, 1 H), 5.03 (s, 1 H), 4.48 (s, 2 H), 1.87 (s, 3 H).

**<sup>13</sup>C NMR (100 MHz, CDCl<sub>3</sub>):** δ 158.9, 139.8, 139.8, 129.6, 121.9, 113.2, 109.7, 91.7, 73.0, 19.5.

**IR (neat, cm<sup>-1</sup>):** 2975, 2920, 1572, 1440, 1259, 1060, 1014, 904, 766, 697

**HRMS (ESI):** [M+H]<sup>+</sup> calcd for C<sub>10</sub>H<sub>11</sub>ClIO 308.9538, found 308.9542.

**1-(3,3-Dimethyl-2-methylenebutoxy)-2-iodobenzene (1l)**

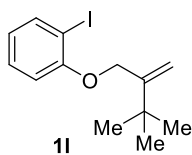

This compound was prepared from 2-iodophenol (2.20 g, 10.0 mmol) and 3,3-dimethyl-2-methylenebutan-1-ol (1.14 g, 10.0 mmol) according to General procedure B.

1.96 g, 62% yield, colorless oil, R<sub>f</sub> = 0.8 (silica gel, petroleum ether).

**<sup>1</sup>H NMR (400 MHz, CDCl<sub>3</sub>):** δ 7.77 (dd, *J* = 1.6, 8.0 Hz, 1 H), 7.29-7.24 (m, 1 H), 6.79 (dd, *J* = 1.2, 8.4 Hz, 1 H), 6.69 (m, 1 H), 5.33 (d, *J* = 1.2 Hz, 1 H), 5.13 (d, *J* = 0.8 Hz, 1 H), 4.61 (s, 2 H), 1.18 (s, 9 H).

**<sup>13</sup>C NMR (100 MHz, CDCl<sub>3</sub>):** δ 157.3, 151.2, 139.5, 129.3, 122.4, 112.1, 110.0, 86.4, 69.1, 34.8, 29.5.

**IR (neat, cm<sup>-1</sup>):** 2961, 2868, 1638, 1582, 1472, 1438, 1274, 1019, 909, 747 cm<sup>-1</sup>.

**HRMS (ESI):** [M+H]<sup>+</sup> calcd for C<sub>13</sub>H<sub>18</sub>IO 317.0397, found 317.0400.

### 1-Iodo-2-((2-methylenedecyl)oxy)benzene (1m)

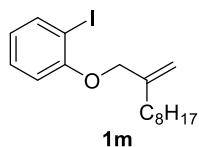

This compound was prepared from 2-iodophenol (2.20 g, 10.0 mmol) and 2-methylenedecan-1-ol (1.70 g, 10.0 mmol) according to the General procedure B. 2.42 g, 65% yield, colorless oil, R<sub>f</sub> = 0.8 (silica gel, petroleum ether).

**<sup>1</sup>H NMR (400 MHz, CDCl<sub>3</sub>):** δ 7.77 (dd, *J* = 1.6, 7.6 Hz, 1 H), 7.29-7.25 (m, 1 H), 6.79 (dd, *J* = 0.8, 8.4 Hz, 1 H), 6.70 (m, 1 H), 5.22 (s, 1 H), 5.01 (d, *J* = 0.8 Hz, 1 H), 4.50 (s, 2 H), 2.18 (t, *J* = 8.0 Hz, 2 H), 1.54-1.47 (m, 2 H), 1.31-1.27 (m, 10 H), 0.88 (t, *J* = 6.4 Hz, 3 H).

**<sup>13</sup>C NMR (100 MHz, CDCl<sub>3</sub>):** δ 157.2, 144.3, 139.5, 129.3, 122.5, 112.3, 111.9, 86.6, 71.6, 33.2, 31.9, 29.44, 29.41, 29.3, 27.6, 22.7, 14.1.

**IR (neat, cm<sup>-1</sup>):** 2926, 2857, 1582, 1472, 1439, 1291, 1244, 1019, 746, 727.

**HRMS (ESI):** [M+H]<sup>+</sup> calcd for C<sub>17</sub>H<sub>26</sub>IO 373.1023, found 373.1024.

### 1-((2-((But-3-en-1-yloxy)methyl)allyl)oxy)-2-iodobenzene (1o)

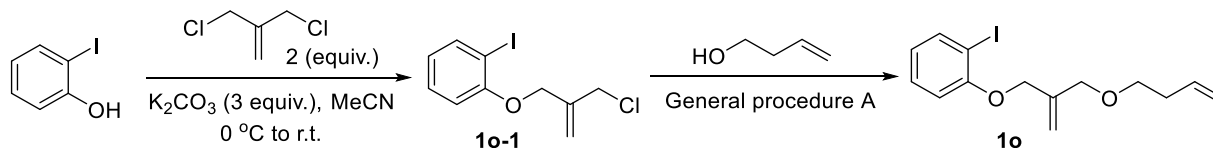

Compound **1o-1** was synthesized according to the literature procedure.<sup>17</sup> To a solution of K<sub>2</sub>CO<sub>3</sub> (4.15 g, 30.0 mmol), 3-chloro-2-(chloromethyl)prop-1-ene (2.32 mL, 20.0 mmol) in acetonitrile (25.0 mL) was added 2-iodophenol (2.20 g, 10.0 mmol) at 0 °C. The reaction mixture was stirred at room temperature overnight, and filtered through a pad of celite. The filtrate was concentrated under reduced pressure. The residue was purified by flash chromatography on silica gel to afford 2.16 g of **1o-1** (93% purity, mixed with dichloromethyl ethylene).

Compound **1o** was prepared from the above crude **1o-1** and but-3-en-1-ol (0.50 g, 7.0 mmol) according to the General procedure A.

1.69 g, 49% yield for two steps, colorless oil, R<sub>f</sub> = 0.3 (silica gel, petroleum ether/ethyl acetate = 50:1).

**<sup>1</sup>H NMR (400 MHz, CDCl<sub>3</sub>):** δ 7.77 (dd, *J* = 8.0, 1.6 Hz, 1 H), 7.30-7.25 (m, 1 H), 6.82 (dd, *J* = 8.4, 1.2 Hz, 1 H), 6.71 (m, 1 H), 5.87-5.77 (m, 1 H), 5.43 (d, *J* = 0.4 Hz, 1 H), 5.29 (d, *J* = 0.8 Hz, 1 H),

5.12-5.01 (m, 2 H), 4.59 (s, 2 H), 4.13 (s, 2 H), 3.52 (t,  $J = 6.8$  Hz, 2 H), 2.38-2.33 (m, 2 H).

**$^{13}\text{C}$  NMR (100 MHz,  $\text{CDCl}_3$ ):**  $\delta$  157.0, 140.9, 139.4, 135.2, 129.3, 122.6, 116.4, 114.8, 112.2, 86.5, 71.6, 69.7, 69.4, 34.2.

**IR (neat,  $\text{cm}^{-1}$ ):** 3071, 2857, 1582, 1474, 1440, 1247, 1098, 1018, 917, 747.

**HRMS (ESI):**  $[\text{M}+\text{H}]^+$  calcd for  $\text{C}_{14}\text{H}_{18}\text{IO}_2$  345.0346, found 345.0352.

### 1-Iodo-2-((4-methylpent-4-en-1-yl)oxy)benzene (1q)

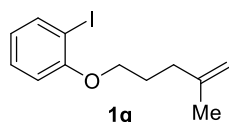

This compound was prepared from 2-iodophenol (2.20 g, 10.0 mmol) and 4-methylpent-4-en-1-ol (1.00 g, 10.0 mmol) according to General procedure B.

2.05g, 68% yield, colorless oil,  $R_f = 0.7$  (silica gel, petroleum ether).

**$^1\text{H}$  NMR (400 MHz,  $\text{CDCl}_3$ ):**  $\delta$  7.76 (dd,  $J = 1.6$  Hz,  $J = 7.6$  Hz, 1 H), 7.29-7.24 (m, 1 H), 6.78 (dd,  $J = 0.8$  Hz,  $J = 8.4$  Hz, 1 H), 6.68 (dt,  $J = 1.2$  Hz,  $J = 7.6$  Hz, 1 H), 4.75 (s, 2 H), 4.00 (t,  $J = 6.0$  Hz, 2 H), 2.27 (t,  $J = 7.2$  Hz, 2 H), 2.01-1.94 (m, 2 H), 1.77 (s, 3 H).

**$^{13}\text{C}$  NMR (100 MHz,  $\text{CDCl}_3$ ):**  $\delta$  157.5, 144.8, 139.3, 129.3, 122.3, 112.0, 110.5, 86.7, 68.4, 34.0, 27.0, 22.4.

**IR (neat,  $\text{cm}^{-1}$ ):** 3072, 2918, 2874, 1694, 1464, 1275, 1052, 1018, 889, 746

**HRMS (ESI):**  $[\text{M}+\text{H}]^+$  calcd for  $\text{C}_{12}\text{H}_{16}\text{IO}$  303.0240, found 303.0248

### (3-Iodo-4-((2-methylallyl)oxy)phenyl)(piperidin-1-yl)methanone (1r)

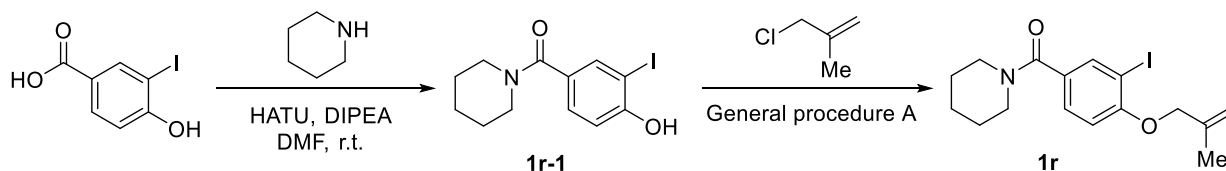

**Step 1:** Compound **1r-1** was synthesized according to the literature procedure.<sup>18</sup> To a solution of 4-hydroxy-3-iodobenzoic acid (2.64 g, 10.0 mmol) in DMF (25.0 mL) at 0 °C was added 1-[Bis(dimethylamino)methylene]-1H-1,2,3-triazolo[4,5-b]pyridinium 3-oxid hexafluorophosphate (HATU, 5.70 g, 15.0 mmol) and *N,N*-Diisopropylethylamine (DIPEA, 2.50 mL, 15.0 mmol). The reaction mixture was stirred at room temperature for 1 h, and piperidine (1.0 mL, 12.0 mmol) was dropwise added. The reaction mixture was stirred at room temperature for 24 h. The reaction was quenched with  $\text{H}_2\text{O}$ , and extracted with ethyl acetate ( $3 \times 20.0$  mL). The combined organic layers were washed with saturated aqueous  $\text{NH}_4\text{Cl}$ , brine, dried over anhydrous  $\text{Na}_2\text{SO}_4$ , and concentrated under reduced pressure. The residue was purified by flash chromatography on silica gel to give **1r-1** as a white solid (2.71 g, 82% yield, mp: 181-183 °C).

**<sup>1</sup>H NMR (400 MHz, CDCl<sub>3</sub>):** δ 7.72 (s, 1 H), 7.44 (s, 1 H), 7.20 (d, *J* = 6.8 Hz, 1 H), 6.83 (d, *J* = 8.0 Hz, 1 H), 3.67 (brs, 2 H), 3.41 (brs, 2 H), 1.68-1.60 (m, 6 H).

**<sup>13</sup>C NMR (100 MHz, CDCl<sub>3</sub>):** δ 169.3, 157.3, 137.5, 128.8, 128.7, 115.0, 84.8, 49.1, 43.6, 26.3, 25.6, 24.4.

**IR (neat, cm<sup>-1</sup>):** 3728, 2937, 2621, 1699, 1507, 1277, 1114, 1025, 832, 761.

**HRMS (ESI):** [M+H]<sup>+</sup> calcd for C<sub>12</sub>H<sub>15</sub>INO<sub>2</sub> 332.0142, found 332.0150.

**Step 2:** Compound **1r** was prepared from **1r-1** (1.66 g, 5.0 mmol) and 3-chloro-2-methylprop-1-ene (0.5 mL, 5.0 mmol) according to the General procedure A.

1.48 g, 77% yield, white solid, mp: 62-64 °C, *R*<sub>f</sub> = 0.3 (silica gel, petroleum ether/ethyl acetate = 4:1).

**<sup>1</sup>H NMR (400 MHz, CDCl<sub>3</sub>):** δ 7.84 (d, *J* = 2.0 Hz, 1 H), 7.35 (dd, *J* = 2.0, 8.4 Hz, 1 H), 6.78 (d, *J* = 8.4 Hz, 1 H), 5.19 (s, 1 H), 5.03 (s, 1 H), 4.51 (s, 2 H), 3.60 (brs, 2 H), 3.45 (brs, 2 H), 1.87 (s, 3 H), 1.68-1.59 (m, 6 H).

**<sup>13</sup>C NMR (100 MHz, CDCl<sub>3</sub>):** δ 168.3, 157.7, 139.5, 138.1, 130.3, 128.4, 113.0, 111.3, 86.0, 72.4, 48.8, 43.2, 26.2, 25.4, 24.4, 19.3.

**IR (neat, cm<sup>-1</sup>):** 3474, 3459, 2910, 2823 1634, 1437, 1277, 1262, 776, 751.

**HRMS (ESI):** [M+H]<sup>+</sup> calcd for C<sub>16</sub>H<sub>21</sub>INO<sub>2</sub> 386.0611, found 386.0616.

#### ***Tert*-butyl (2-iodo-4-methylphenyl)(2-methylallyl)carbamate (**1z**)**

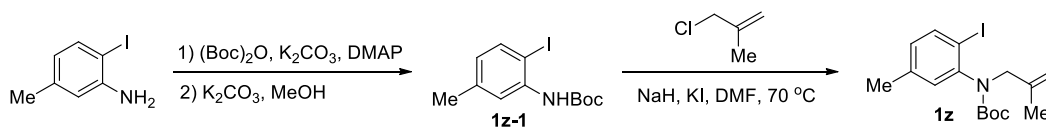

#### **General Procedure:**

Compound **1z-1** was synthesized according to the literature procedure.<sup>14</sup> To a solution of 2-iodo-5-methylaniline (2.33 g, 10.0 mmol) in THF (30.0 mL) was added K<sub>2</sub>CO<sub>3</sub> (2.77 g, 20.0 mmol) and DMAP (0.12 g, 1.0 mmol) at 0 °C, followed by slowly addition of (Boc)<sub>2</sub>O (2.29 g, 10.5 mmol) after 10 min. The reaction mixture was allowed to warm to room temperature and stirred for 3 h. The reaction was quenched with saturated aqueous solution of NaHCO<sub>3</sub> (30.0 mL), and extracted with ethyl acetate (3 × 30.0 mL). The combined organic layers were washed with saturated aqueous Na<sub>2</sub>S<sub>2</sub>O<sub>3</sub>, brine, dried over anhydrous Na<sub>2</sub>SO<sub>4</sub> and concentrated under reduced pressure to give the crude product. The residue was then engaged in the known procedure (K<sub>2</sub>CO<sub>3</sub> (4.15 g, 30.0 mmol), MeOH (30.0 mL), 3 h, 70 °C) to obtain the crude product **1z-1**.

To a solution of the above crude compound **1z-1** in DMF (20.0 mL) was added KI (1.99 g, 12.0 mmol) and NaH (0.36 g, 15.0 mmol) at 0 °C, followed by slowly addition of 3-chloro-2-methylprop-1-ene (0.91 g, 10.0 mmol) after 20 min. The reaction mixture was allowed to



warm to room temperature and stirred at 70 °C for 3 h. The reaction was quenched with water (40.0 mL), and extracted with ethyl acetate (3 × 30.0 mL). The combined organic layers were washed with saturated aqueous Na<sub>2</sub>S<sub>2</sub>O<sub>3</sub>, brine, dried over anhydrous Na<sub>2</sub>SO<sub>4</sub>, and concentrated under reduced pressure. The residue was purified by flash chromatography on silica gel to give the product **1z**.

2.79 g, 72% yield, colorless oil, R<sub>f</sub> = 0.7 (silica gel, petroleum ether/ethyl acetate = 20:1).

**<sup>1</sup>H NMR (400 MHz, CDCl<sub>3</sub>, mixture of rotamers):** δ 7.70 (d, *J* = 8.0 Hz, 1 H), [7.04 (s), 6.95 (s), 1 H], 6.79 (d, *J* = 7.2 Hz, 1 H), 4.85 (s, 1 H), 4.77 (s, 1 H), [4.56 (d, *J* = 15.6 Hz), 4.48 (d, *J* = 16.0 Hz), 1 H], 3.48 (d, *J* = 15.6 Hz, 1 H), 2.29 (s, 3 H), 1.82 (s, 3 H), [1.52 (s), 1.37 (s), 9 H].

**<sup>13</sup>C NMR (100 MHz, CDCl<sub>3</sub>, mixture of rotamers):** δ 154.2, 144.4, 141.2, 139.2, 138.9, 138.7, 130.9, 130.3, 129.9, 129.6, 112.8, 112.6, 95.8, 80.6, 80.2, 56.3, 55.2, 28.2, 20.9, 20.6.

**IR (neat, cm<sup>-1</sup>):** 2974, 2925, 1706, 1593, 1367, 1299, 1170, 937, 861, 759.

**HRMS (ESI):** [M+H]<sup>+</sup> calcd for C<sub>16</sub>H<sub>23</sub>INO<sub>2</sub> 388.0768, found 388.0774.

NOTE: Because of the amide bond rotation equilibrium, the rotamers of **1z** were observed on the NMR. This phenomenon is seen with many tertiary amides. For related references, see: ref. 19-20.

#### ***Tert*-butyl (2-iodo-5-methylphenyl)(2-methylallyl)carbamate (**1aa**)**

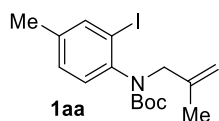

This compound was prepared from 2-iodo-4-methylaniline (2.33 g, 10.0 mmol) according to the General Procedure for the synthesis of **1z**.

2.94 g, 76% yield, colorless oil, R<sub>f</sub> = 0.7 (silica gel, petroleum ether/ethyl acetate = 20:1).

**<sup>1</sup>H NMR (400 MHz, CDCl<sub>3</sub>, mixture of rotamers):** δ 7.68 (s, 1 H), 7.26-6.99 (m, 2 H), 4.83 (s, 1 H), 4.74 (s, 1 H), [4.58 (d, *J* = 15.2 Hz), 4.49 (d, *J* = 15.2 Hz), 1 H], 3.47 (d, *J* = 16.0 Hz, 1 H), 2.29 (s, 3 H), 1.81 (s, 3 H), [1.52 (s), 1.36 (s), 9 H].

**<sup>13</sup>C NMR (100 MHz, CDCl<sub>3</sub>, mixture of rotamers):** δ 154.3, 142.0, 141.8, 141.4, 141.2, 140.0, 139.7, 139.0, 138.6, 129.6, 129.3, 129.1, 113.0, 112.8, 99.7, 80.5, 80.0, 56.2, 55.1, 28.2, 20.5, 20.4.

**IR (neat, cm<sup>-1</sup>):** 3077, 2976, 2925, 1706, 1487, 1368, 1297, 1171, 866, 763.

**HRMS (ESI):** [M+H]<sup>+</sup> calcd for C<sub>16</sub>H<sub>23</sub>INO<sub>2</sub> 388.0768, found 388.0774.

NOTE: Because of the amide bond rotation equilibrium, the rotamers of **1aa** were observed on the NMR. This phenomenon is seen with many tertiary amides. For related references, see: ref. 19-20.

#### ***Tert*-butyl (5-chloro-2-iodophenyl)(2-methylallyl)carbamate (**1ab**)**

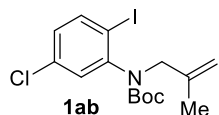

This compound was prepared from 5-chloro-2-iodoaniline (2.53 g, 10.0 mmol)

according to the General Procedure for the synthesis of **1z**.

3.30 g, 81% yield, white solid, mp: 184-186 °C,  $R_f$  = 0.6 (silica gel, petroleum ether/ethyl acetate = 20:1).

**$^1\text{H}$  NMR (400 MHz,  $\text{CDCl}_3$ , mixture of rotamers):**  $\delta$  7.77 (d,  $J$  = 8.4 Hz, 1 H), [7.26 (s), 7.20 (s), 1 H], 6.70 (dd,  $J$  = 2.4 Hz,  $J$  = 8.4 Hz, 1 H), 4.88 (s, 1 H), 4.75 (s, 1 H), 4.58-4.54 (m, 1 H), 3.50-3.46 (m, 1 H), 1.82 (s, 3 H), [1.52 (s), 1.37 (s), 9 H].

**$^{13}\text{C}$  NMR (100 MHz,  $\text{CDCl}_3$ , mixture of rotamers):**  $\delta$  153.7, 145.7, 140.8, 140.0, 134.2, 129.8, 128.8, 113.5, 97.6, 80.7, 56.1, 55.0, 28.2, 20.48.

**IR (neat,  $\text{cm}^{-1}$ ):** 2976, 1708, 1572, 1463, 1366, 1289, 1165, 863, 729.

**HRMS (ESI):**  $[\text{M}+\text{H}]^+$  calcd for  $\text{C}_{15}\text{H}_{20}\text{ClINO}_2$  408.0222, found 408.0219.

NOTE: Because of the amide bond rotation equilibrium, the rotamers of **1ab** were observed on the NMR. This phenomenon is seen with many tertiary amides. For related references, see: ref. 19-20.

#### 1-Iodo-4-methyl-2-(3-methylbut-3-en-1-yl)benzene (**1ad**)

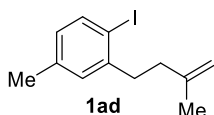

This compound was prepared from (2-iodo-5-methylphenyl)methanol (2.48 g, 10.0 mmol) according to the literature reference 15.

1.86 g, 65% yield, colorless oil,  $R_f$  = 0.8 (silica gel, petroleum ether).

**$^1\text{H}$  NMR (400 MHz,  $\text{CDCl}_3$ ):**  $\delta$  7.66 (d,  $J$  = 8.0 Hz, 1 H), 7.04 (d,  $J$  = 2.0 Hz, 1 H), 6.70 (dd,  $J$  = 2.0 Hz,  $J$  = 8.0 Hz, 1 H), 4.76 (s, 2 H), 2.81-2.77 (m, 2 H), 2.31-2.23 (m, 5 H), 1.81 (s, 3 H).

**$^{13}\text{C}$  NMR (100 MHz,  $\text{CDCl}_3$ ):**  $\delta$  145.1, 144.4, 139.1, 138.2, 130.2, 128.7, 110.3, 96.3, 39.3, 38.4, 22.6, 20.9.

**IR (neat,  $\text{cm}^{-1}$ ):** 3075, 2951, 2924, 2854, 1648, 1592, 1467, 1122, 1011, 886.

**HRMS (APCI):**  $[\text{M}+\text{H}]^+$  calcd for  $\text{C}_{12}\text{H}_{15}\text{I}$  287.0291, found 287.0300.

#### 5-Iodo-6-(3-methylbut-3-en-1-yl)benzo[d][1,3]dioxole (**1ae**)

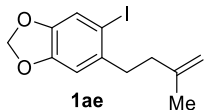

This compound was prepared from 5-(bromomethyl)-6-iodobenzo[d][1,3]dioxole<sup>21</sup> (1.52 g, 10.0 mmol) according to the literature reference 15.

2.40 g, 76% yield, colorless oil,  $R_f$  = 0.4 (silica gel, petroleum ether).

**$^1\text{H}$  NMR (400 MHz,  $\text{CDCl}_3$ ):**  $\delta$  7.22 (s, 1 H), 6.73 (s, 1 H), 5.93 (s, 2 H), 4.75 (d,  $J$  = 9.6 Hz, 2 H), 2.78-2.74 (m, 2 H), 2.24-2.20 (m, 2 H), 1.80 (s, 3 H).

**$^{13}\text{C}$  NMR (100 MHz,  $\text{CDCl}_3$ ):**  $\delta$  148.4, 146.6, 144.9, 137.9, 118.5, 110.5, 109.1, 101.4, 87.6, 39.3, 38.4, 22.6.

**IR (neat, cm<sup>-1</sup>):** 3074, 2925, 1648, 1596, 1226, 1107, 1041, 935, 889, 826.

**HRMS (ESI):** [M+H]<sup>+</sup> calcd for C<sub>12</sub>H<sub>14</sub>IO<sub>2</sub> 317.0041, found 317.0033.

#### 4-Fluoro-1-iodo-2-(3-methylbut-3-en-1-yl)benzene (1af)

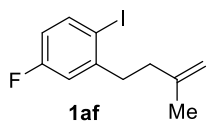

This compound was prepared from (5-fluoro-2-iodophenyl)methanol (2.52 g, 10.0 mmol) according to the literature reference 15.

1.62 g, 56% yield, colorless oil, R<sub>f</sub> = 0.4 (silica gel, petroleum ether).

**<sup>1</sup>H NMR (400 MHz, CDCl<sub>3</sub>):** δ 7.25-7.19 (m, 1 H), 6.96 (d, *J* = 8.0 Hz, 1 H), 6.91-6.85 (m, 1 H), 4.72-4.70 (m, 2 H), 2.77-2.73 (m, 2 H), 2.33-2.29 (m, 2 H), 1.76 (s, 3 H).

**<sup>13</sup>C NMR (100 MHz, CDCl<sub>3</sub>):** δ 162.9 (d, *J*<sub>C-F</sub> = 325 Hz), 144.8 (d, *J*<sub>C-F</sub> = 8.0 Hz), 144.7, 129.6 (d, *J*<sub>C-F</sub> = 9.0 Hz), 124.0, 115.1 (d, *J*<sub>C-F</sub> = 21.0 Hz), 112.6 (d, *J*<sub>C-F</sub> = 21.0 Hz), 110.5, 39.2, 33.9, 22.5.

148.4, 146.6, 144.9, 137.9, 118.5, 110.5, 109.1, 101.4, 87.6, 39.3, 38.4, 22.6.

**<sup>19</sup>F NMR (376 MHz, CDCl<sub>3</sub>):** δ -114.0

**IR (neat, cm<sup>-1</sup>):** 2917, 2849, 1590, 1453, 1417, 1270, 1112, 887, 781, 688.

**HRMS (ESI):** [M+H]<sup>+</sup> calcd for C<sub>11</sub>H<sub>13</sub>FI 291.0040, found 291.0049.

### 3.2 Synthesis of Alkenyl Triflate Reagents 2a-2v

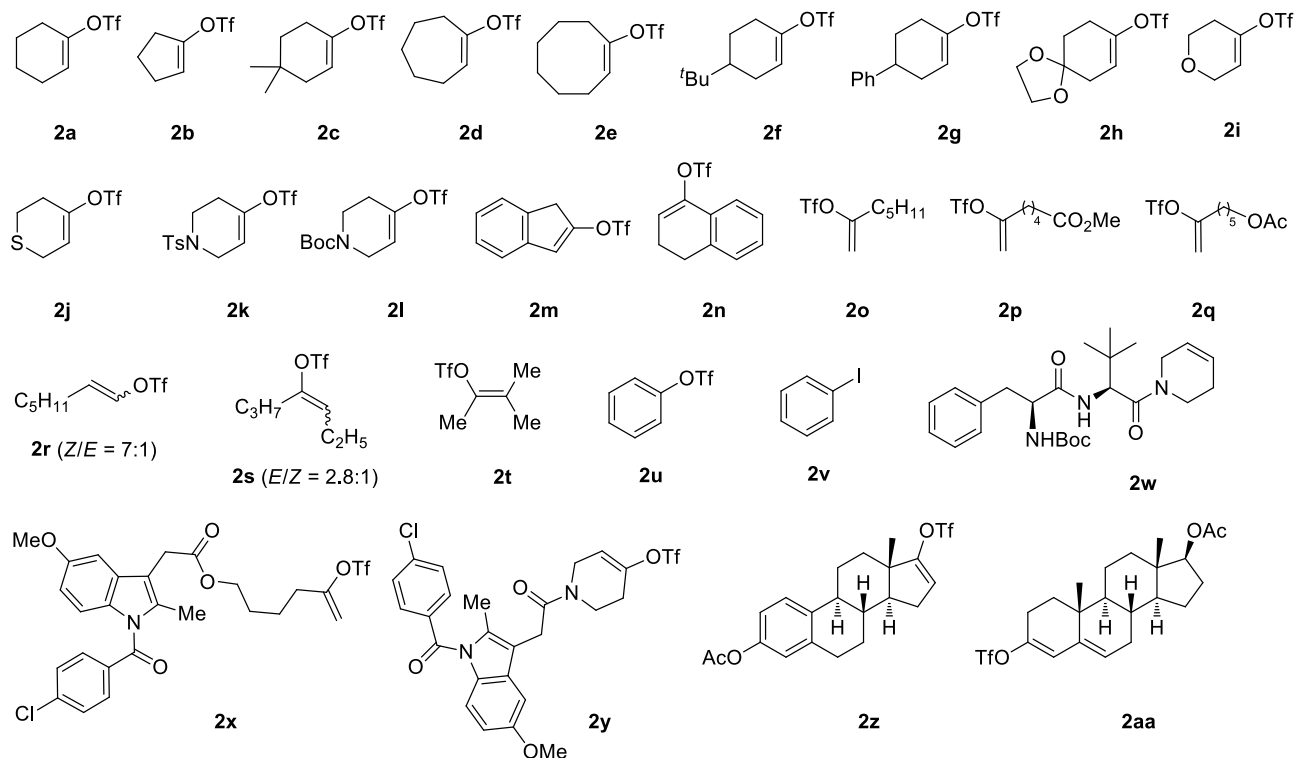

Alkenyl triflates **2a**,<sup>22</sup> **2b**,<sup>22</sup> **2c**,<sup>23</sup> **2d**,<sup>22</sup> **2e**,<sup>22</sup> **2f**,<sup>22</sup> **2g**,<sup>24</sup> **2h**,<sup>22</sup> **2i**,<sup>22</sup> **2j**,<sup>25</sup> **2k**,<sup>26</sup> **2l**,<sup>27</sup> **2m**,<sup>28</sup> **2n**,<sup>22</sup> **2z**,<sup>29</sup> **2aa**,<sup>30</sup> are known compounds, and were synthesized according the literature procedure.<sup>22</sup> Known

compound **2r** was prepared according to the literature procedure.<sup>31</sup> Known compound **2s** was prepared according to the literature procedure.<sup>32</sup> Known compound **2t** was prepared according to the literature procedure.<sup>33</sup> Known compound **2u** was prepared according to the literature procedure.<sup>34</sup> The preparation of new compounds, and their characterization data are provided as follows.

### General procedure C:

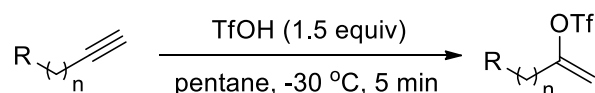

These compounds were synthesized according the literature procedure.<sup>22</sup> To a solution of alkyne (10.0 mmol) in pentane (20.0 mL) was dropwise added trifluoromethanesulfonic acid (1.33 mL, 15.0 mmol) at -30 °C. The reaction mixture was warmed to 0 °C after 1 h, and quenched with saturated aqueous NaHCO<sub>3</sub>. The organic layer was separated after 5 min, washed twice with saturated aqueous NaHCO<sub>3</sub>, dried over anhydrous Na<sub>2</sub>SO<sub>4</sub>, and concentrated under reduced pressure. The residue was purified by flash chromatography on silica gel to give alkenyl triflates.

### Hept-1-en-2-yl trifluoromethanesulfonate (**2o**)

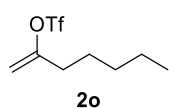

This compound was prepared from hept-1-yne (0.96 g, 10.0 mmol) according to the General procedure C.

1.79 g, 73% yield, colorless oil,  $R_f$  = 0.8 (silica gel, petroleum ether).

**<sup>1</sup>H NMR (600 MHz, CDCl<sub>3</sub>):**  $\delta$  5.08 (d,  $J$  = 3.6 Hz, 1 H), 4.92 (d,  $J$  = 3.6 Hz, 1 H), 2.33 (t,  $J$  = 7.8 Hz, 2 H), 1.56-1.54 (m, 2 H), 1.36-1.32 (m, 4 H), 0.92-0.90 (m, 3 H).

**<sup>13</sup>C NMR (150 MHz, CDCl<sub>3</sub>):**  $\delta$  157.2, 118.6 (q,  $J_{C-F}$  = 318.0 Hz), 103.9, 33.8, 30.8, 25.7, 22.2, 13.8.

**<sup>19</sup>F NMR (564 MHz, CDCl<sub>3</sub>):**  $\delta$  -74.3.

**IR (neat, cm<sup>-1</sup>):** 2962, 2875, 1671, 1419, 1251, 1142, 1094, 947, 705, 613.

**HRMS (ESI):**  $[M+H]^+$  calcd for C<sub>8</sub>H<sub>14</sub>F<sub>3</sub>O<sub>3</sub>S 247.0610, found 247.0610.

### Methyl 6-(((trifluoromethyl)sulfonyl)oxy)hept-6-enoate (**2p**)

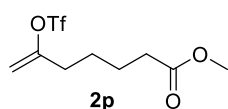

This compound was prepared from methyl hept-6-ynoate<sup>35</sup> (1.40 g, 10.0 mmol) according to the General procedure C.

2.37 g, 82% yield, colorless oil,  $R_f$  = 0.4 (silica gel, petroleum ether/ethyl acetate = 10:1).

**<sup>1</sup>H NMR (400 MHz, CDCl<sub>3</sub>):**  $\delta$  5.12 (d,  $J$  = 3.6 Hz, 1 H), 4.97 (d,  $J$  = 3.6 Hz, 1 H), 3.68 (s, 3 H),

2.39-2.34 (m, 4 H), 1.72-1.66 (m, 2 H), 1.63-1.57 (m, 2 H).

**<sup>13</sup>C NMR (100 MHz, CDCl<sub>3</sub>):** δ 173.6, 156.2, 118.4 (q,  $J_{C-F}$  = 318.0 Hz), 104.5, 51.5, 33.5, 33.4, 25.3, 23.8.

**<sup>19</sup>F NMR (376 MHz, CDCl<sub>3</sub>):** δ -74.2.

**IR (neat, cm<sup>-1</sup>):** 2956, 2874, 1740, 1417, 1211, 1073, 943, 830, 791, 638.

**HRMS (ESI):** [M+H]<sup>+</sup> calcd for C<sub>9</sub>H<sub>14</sub>F<sub>3</sub>O<sub>5</sub>S 291.0509, found 291.0510.

### 6-(((Trifluoromethyl)sulfonyl)oxy)hept-6-en-1-yl acetate (**2q**)

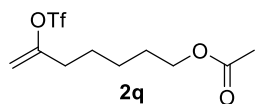

This compound was prepared from hept-6-yn-1-yl acetate<sup>36</sup> (1.54 g, 10.0 mmol) according to the General procedure C.

2.37 g, 78% yield, colorless oil,  $R_f$  = 0.4 (silica gel, petroleum ether/ethyl acetate = 10:1).

**<sup>1</sup>H NMR (400 MHz, CDCl<sub>3</sub>):** δ 5.11 (d,  $J$  = 3.6 Hz, 1 H), 4.95 (d,  $J$  = 3.6 Hz, 1 H), 4.07 (t,  $J$  = 6.4 Hz, 2 H), 2.36 (t,  $J$  = 7.2 Hz, 2 H), 2.06 (s, 3 H), 1.70-1.55 (m, 4 H), 1.46-1.39 (m, 2 H).

**<sup>13</sup>C NMR (100 MHz, CDCl<sub>3</sub>):** δ 171.2, 156.5, 118.4 (q,  $J_{C-F}$  = 318.0 Hz), 104.3, 64.1, 33.7, 28.1, 25.5, 25.0, 20.9.

**<sup>19</sup>F NMR (376 MHz, CDCl<sub>3</sub>):** δ -74.2.

**IR (neat, cm<sup>-1</sup>):** 2954, 2870, 1739, 1643, 1417, 1210, 1141, 900, 706, 637.

**HRMS (ESI):** [M+H]<sup>+</sup> calcd for C<sub>10</sub>H<sub>16</sub>F<sub>3</sub>O<sub>5</sub>S 305.0665, found 305.0665.

### 1-((*S*)-2-((*S*)-2-((*Tert*-butoxycarbonyl)amino)-3-phenylpropanamido)-3,3-dimethylbutanoyl)-1,2,3,6-tetrahydropyridin-4-yl trifluoromethanesulfonate (**2w**)

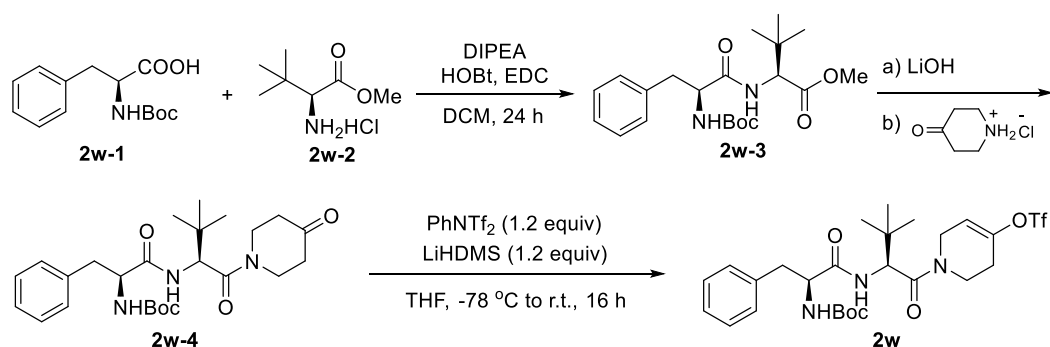

To a stirred solution of acid **2w-1**<sup>37</sup> (2.65 g, 10.0 mmol) and ester **2w-2**<sup>38</sup> (1.81 g, 10.0 mmol) in CH<sub>2</sub>Cl<sub>2</sub> (20.0 mL) at 0 °C was added DIPEA (1.65 mL, 10.0 mmol), hydroxybenzotriazole (HOBt, 1.49 g, 11.0 mmol) and 1-ethyl-3-(3-dimethylaminopropyl)carbodiimide (EDC, 1.92 g, 10.0 mmol). The reaction mixture was stirred at the same temperature for 10 min, and then room temperature for 24 h. The reaction was quenched with saturated aqueous NaHCO<sub>3</sub>, extracted with ethyl acetate (3 ×

30.0 mL). The combined organic layers were washed with brine, dried over anhydrous Na<sub>2</sub>SO<sub>4</sub>, and concentrated under reduced pressure. The residue was purified by flash chromatography on silica gel to give peptide **2w-3** as a white solid (2.74 g, 70% yield, mp: 114-116 °C).

**<sup>1</sup>H NMR (400 MHz, CDCl<sub>3</sub>):** δ 7.31-7.20 (m, 5 H), 6.46 (d, *J* = 9.2 Hz, 1 H), 5.09 (d, *J* = 7.2 Hz, 1 H), 4.39-4.33 (m, 2 H), 3.67 (s, 3 H), 3.06 (d, *J* = 6.8 Hz, 2 H), 1.42 (s, 9 H), 0.91 (s, 9 H).

**<sup>13</sup>C NMR (100 MHz, CDCl<sub>3</sub>):** δ 171.3, 170.9, 155.4, 136.6, 129.2, 128.6, 126.8, 80.1, 60.0, 56.0, 51.7, 37.8, 34.7, 28.2, 26.4.

**IR (neat, cm<sup>-1</sup>):** 3317, 2973, 1743, 1655, 1537, 1368, 1168, 1023, 881, 700.

**HRMS (ESI):** [M+H]<sup>+</sup> calcd for C<sub>21</sub>H<sub>33</sub>N<sub>2</sub>O<sub>5</sub> 393.2384, found 393.2388.

To a solution of peptide **2w-3** (5.0 mmol, 1.96 g) in THF/H<sub>2</sub>O (10.0 mL/10.0 mL) was added LiOH H<sub>2</sub>O (1.05 g, 25.0 mmol) at 0 °C. The reaction mixture was stirred at the same temperature for 20 min, then room temperature for 24 h. The reaction was quenched with saturated aqueous NaHCO<sub>3</sub>, and extracted with ethyl acetate (3 × 30.0 mL). The combined organic layers were washed with brine, dried over anhydrous Na<sub>2</sub>SO<sub>4</sub>, and concentrated under reduced pressure. The residue was used for the next step without purification.

To a stirred solution of the above residue in THF/CH<sub>2</sub>Cl<sub>2</sub> (10.0 mL/10.0 mL) at room temperature was added 1-[Bis(dimethylamino)methylene]-1H-1,2,3-triazolo[4,5-b]pyridinium 3-oxid hexafluorophosphate (HATU, 3.81 g, 10.0 mmol) and N,N-diisopropylethylamine (DIPEA, 2.06 mL, 12.5 mmol), followed by 4-oxopiperidinium chloride (0.68 g, 5.0 mmol) after 10 min. The reaction mixture was stirred at room temperature for 24 h. The reaction was quenched with saturated aqueous NaHCO<sub>3</sub>, and extracted with ethyl acetate (3 × 20.0 mL). The combined organic layers were washed with brine, dried over anhydrous Na<sub>2</sub>SO<sub>4</sub>, and concentrated under reduced pressure. The residue was used for the next step without purification.

To a stirred solution of above crude ketone in THF (20.0 mL) was dropwise added Lithium bis(trimethylsilyl)amide (LiHMDS, 0.80 g, 4.8 mmol) at -78 °C. A solution of PhNTf<sub>2</sub> (1.72 g, 4.8 mmol) in THF (10.0 mL) was dropwise added after 1h. The reaction mixture was allowed to warm to room temperature and stirred for 16 h. The reaction was quenched with H<sub>2</sub>O and extracted with ethyl acetate (3 × 20.0 mL). The organic layers were washed with saturated aqueous NH<sub>4</sub>Cl, brine, dried over anhydrous Na<sub>2</sub>SO<sub>4</sub>, and concentrated under reduced pressure. The residue was purified by flash chromatography on silica gel to give alkenyl triflate **2w**.

1.89 g, 64% yield for 3 steps, white solid, mp: 70-72 °C, R<sub>f</sub> = 0.4 (silica gel, petroleum ether/ethyl

acetate = 4:1).

**<sup>1</sup>H NMR (400 MHz, CDCl<sub>3</sub>, mixture of rotamers):** δ 7.30-7.13 (m, 5 H), 7.03-7.01 (m, 1 H), 5.81-5.79 (m, 1 H), 5.29-5.24 (m, 1 H), 4.91-4.80 (m, 1 H), 4.51-3.54 (m, 5 H), 3.14-3.03 (m, 2 H), 2.57-2.44 (m, 2 H), 1.40-1.37 (m, 9 H), 0.96-0.87 (m, 9 H).

**<sup>13</sup>C NMR (100 MHz, CDCl<sub>3</sub>, mixture of rotamers):** δ 171.3, 171.0, 170.1, 169.8, 169.7, 169.5, 155.2, 155.1, 147.5, 145.9, 136.6, 136.53, 136.47, 129.1, 129.0, 128.5, 128.3, 126.8, 126.6, 118.3(q,  $J_{C-F}$  = 319.0 Hz), 115.5, 115.4, 114.7, 79.8, 55.6, 54.7, 54.11, 54.05, 43.7, 43.0, 42.8, 40.2, 40.1, 38.6, 38.5, 38.4, 37.9, 35.7, 35.6, 35.5, 35.3, 28.5, 28.10, 28.05, 27.7, 26.3, 26.23, 26.19, 26.1.

**<sup>19</sup>F NMR (376 MHz, CDCl<sub>3</sub>):** δ -73.76, -73.80.

**IR (neat, cm<sup>-1</sup>):** 3423, 2976, 1701, 1638, 1422, 1368, 1215, 1142, 870, 747.

**HRMS (ESI):** [M+H]<sup>+</sup> calcd for C<sub>26</sub>H<sub>37</sub>F<sub>3</sub>N<sub>3</sub>O<sub>7</sub>S 592.2299, found 592.2309.

NOTE: Because of the amide bond rotation equilibrium, the rotamers of **2w** were observed on the NMR. This phenomenon is seen with many tertiary amides. For related references, see: ref. 19-20

### 5-(((trifluoromethyl)sulfonyl)oxy)hex-5-en-1-yl

### 2-(1-(4-chlorobenzoyl)-5-methoxy-2-methyl-1H-indol-3-yl)acetate (**2x**)

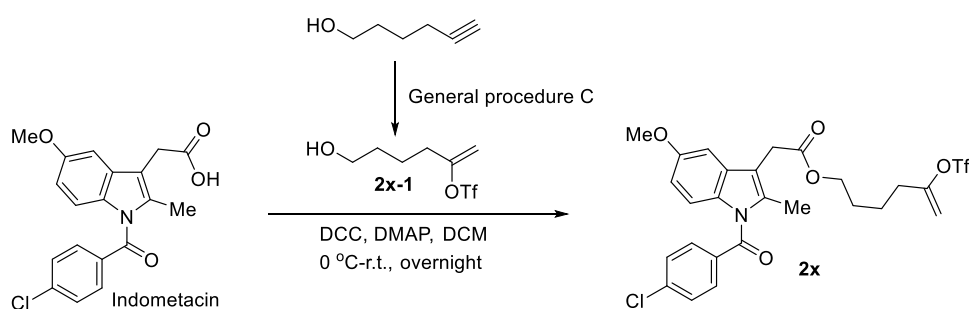

**Step 1:** Triflate **2x-1** (4.22 g, 85% yield) was prepared as a colorless oil from hex-5-yn-1-ol (2.21 mL, 20.0 mmol) according to the General procedure C.

**<sup>1</sup>H NMR (400 MHz, CDCl<sub>3</sub>):** δ 5.11 (d,  $J$  = 3.6 Hz, 1 H), 4.97 (d,  $J$  = 3.6 Hz, 1 H), 3.66 (q,  $J$  = 6.0 Hz, 2 H), 2.39 (t,  $J$  = 6.8 Hz, 2 H), 1.99 (s, 1 H), 1.69-1.58 (m, 4 H).

**<sup>13</sup>C NMR (100 MHz, CDCl<sub>3</sub>):** δ 156.6, 118.4 (q,  $J_{C-F}$  = 318.0 Hz), 104.3, 62.1, 33.5, 31.4, 22.3.

**<sup>19</sup>F NMR (376 MHz, CDCl<sub>3</sub>):** δ -74.2.

**IR (neat, cm<sup>-1</sup>):** 3347, 2947, 2878, 1672, 1418, 1213, 1148, 1066, 948, 706.

**HRMS (ESI):** [M+K]<sup>+</sup> calcd for C<sub>7</sub>H<sub>11</sub>F<sub>3</sub>O<sub>4</sub>SK 286.9962, found 286.9967.

**Step2:** To a solution of Indomethacin (5.37 g, 15.0 mmol) in DCM (30.0 mL) was added dicyclohexylcarbodiimide (DCC, 3.09 g, 15.0 mmol) and 4-dimethylaminopyridine (DMAP, 0.12 g,

1.0 mmol) at 0 °C. The reaction mixture was stirred for 30 min, and a solution of triflate **2x-1** (2.48 g, 10.0 mmol) in DCM (10.0 mL) was added. The reaction mixture was stirred at room temperature overnight. The solvent was removed under reduced pressure, and the residue was treated with water, extracted with ethyl acetate (3 × 30.0 mL). The combined organic layers were washed with water, brine, dried over anhydrous Na<sub>2</sub>SO<sub>4</sub>, and concentrated under reduced pressure. The residue was purified by flash chromatography on silica gel to give the product **2x**.

4.23 g, 72% yield, colorless oil, R<sub>f</sub> = 0.4 (silica gel, petroleum ether/ethyl acetate = 4:1).

**<sup>1</sup>H NMR (400 MHz, CDCl<sub>3</sub>):** δ 7.66 (d, *J* = 8.4 Hz, 2 H), 7.47 (d, *J* = 8.8 Hz, 2 H), 6.96 (d, *J* = 2.4 Hz, 1 H), 6.86 (d, *J* = 8.8 Hz, 1 H), 6.67 (dd, *J* = 2.4, 9.2 Hz, 1 H), 5.08 (d, *J* = 3.2 Hz, 1 H), 4.86 (d, *J* = 3.6 Hz, 1 H), 4.13 (t, *J* = 6.4 Hz, 2 H), 3.83 (s, 3 H), 3.67 (s, 2 H), 2.39 (s, 3 H), 2.33 (t, *J* = 7.6 Hz, 2 H), 1.72-1.52 (m, 4 H).

**<sup>13</sup>C NMR (100 MHz, CDCl<sub>3</sub>):** δ 170.8, 168.2, 156.0, 155.9, 139.2, 135.9, 133.7, 131.1, 130.7, 130.5, 129.0, 118.4 (q, *J*<sub>C-F</sub> = 318 Hz), 114.9, 112.4, 111.4, 104.6, 101.2, 64.2, 55.6, 33.3, 30.2, 27.5, 22.4, 13.3.

**<sup>19</sup>F NMR (376 MHz, CDCl<sub>3</sub>):** δ -74.0.

**IR (neat, cm<sup>-1</sup>):** 3470, 2959, 1735, 1683, 1480, 1418, 1215, 1069, 926, 755.

**HRMS (ESI):** [M+H]<sup>+</sup> calcd for C<sub>26</sub>H<sub>26</sub>ClF<sub>3</sub>NO<sub>7</sub>S 588.1065, found 588.1076.

**1-(2-(1-(4-chlorobenzoyl)-5-methoxy-2-methyl-1H-indol-3-yl)acetyl)-1,2,3,6-tetrahydropyridin-4-yl trifluoromethanesulfonate (2y)**

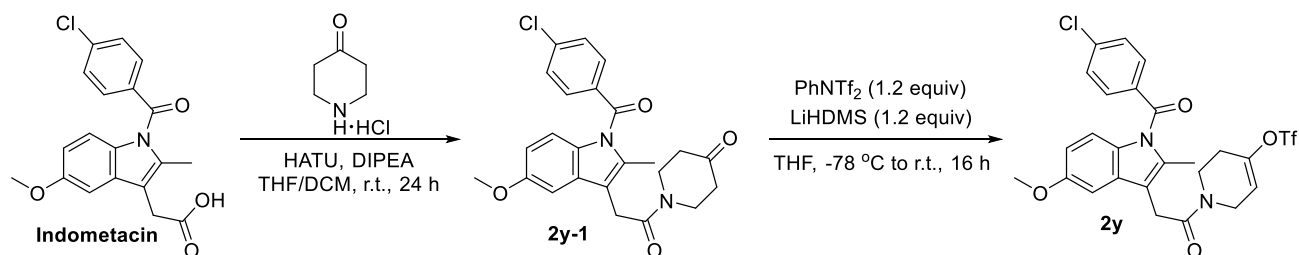

**Step 1:** To a solution of Indometacin (1.97 g, 5.5 mmol) in THF/CH<sub>2</sub>Cl<sub>2</sub> (10.0 mL/10.0 mL) was added 1-[Bis(dimethylamino)methylene]-1H-1,2,3-triazolo[4,5-b]pyridinium 3-oxid hexafluorophosphate (HATU, 4.18 g, 11.0 mmol) and N,N-diisopropylethylamine (DIPEA, 2.06 mL, 12.0 mmol) at room temperature. 4-Oxopiperidinium chloride (0.68 g, 5.0 mmol) was added after 10 min. The reaction mixture was stirred at room temperature for 24 h. The reaction was quenched with saturated aqueous NaHCO<sub>3</sub>, and extracted with ethyl acetate (3 × 20.0 mL). The combined organic layers were washed with brine, dried over anhydrous Na<sub>2</sub>SO<sub>4</sub>, and concentrated under reduced



pressure. The residue was used for the next step without purification.

**Step 2:** To a solution of the above residue in THF (30.0 mL) was dropwise added Lithium bis(trimethylsilyl)amide (LiHMDS, 1.00 g, 6.0 mmol) at -78 °C. A solution of PhNTf<sub>2</sub> (2.15 g, 6.0 mmol) in THF (10.0 mL) was dropwise added after 1 h. The reaction mixture was allowed to warm to room temperature, and stirred for 16 h. The reaction was quenched with H<sub>2</sub>O, and extracted with ethyl acetate (3 × 20.0 mL). The organic layers were washed with saturated aqueous NH<sub>4</sub>Cl, brine, dried over anhydrous Na<sub>2</sub>SO<sub>4</sub>, and concentrated under reduced pressure. The residue was purified by flash chromatography on silica gel to give alkenyl triflate **2y**.

2.05 g, 72% yield for two steps, white solid, mp: 184-186 °C, R<sub>f</sub> = 0.4 (silica gel, petroleum ether/ethyl acetate = 2:1), approximate 1.4:1 ratio of rotamers.

**<sup>1</sup>H NMR (600 MHz, CDCl<sub>3</sub>):** δ 7.66 (d, *J* = 8.4 Hz, 2 H), 7.47 (d, *J* = 8.4 Hz, 2 H), 6.94 (m, 1 H), 6.82-6.80 (m, 1 H), 6.66-6.65 (m, 1 H), [5.81 (s), 5.75 (s), 1 H], [4.25 (d, *J* = 3.0 Hz), 4.14 (d, *J* = 1.8 Hz), 2 H], 3.86-3.67 (m, 7 H), 2.47 (s, 1 H), 2.38 (d, *J* = 6.0 Hz, 3 H), 2.32 (s, 1 H).

**<sup>13</sup>C NMR (150 MHz, CDCl<sub>3</sub>):** δ 169.0, 168.9, 168.2, 156.0, 147.7, 145.7, 139.3, 135.3, 131.1, 130.7, 130.3, 129.1, 118.3 (q, *J*<sub>C-F</sub> = 319.5 Hz), 116.0, 114.9, 114.4, 112.4, 111.6, 111.4, 101.2, 55.6, 43.2, 42.3, 40.4, 38.6, 30.6, 30.5, 28.4, 27.7, 13.3.

**<sup>19</sup>F NMR (376 MHz, CDCl<sub>3</sub>):** δ -73.6, -73.8.

**IR (neat, cm<sup>-1</sup>):** 2928, 2842, 1679, 1418, 1316, 1213, 1142, 1053, 868, 776.

**HRMS (ESI):** [M+H]<sup>+</sup> calcd for C<sub>25</sub>H<sub>23</sub>ClF<sub>3</sub>N<sub>2</sub>O<sub>6</sub>S 571.0912, found 571.0922.

NOTE: Because of the amide bond rotation equilibrium, two rotamers of **2y** were observed on the NMR. This phenomenon is seen with many tertiary amides. For related references, see: ref. 37-38

## 4. Ni-catalyzed Enantioselective Cross-electrophile Aryl-alkenylation of Alkene

### 4.1. General Procedure

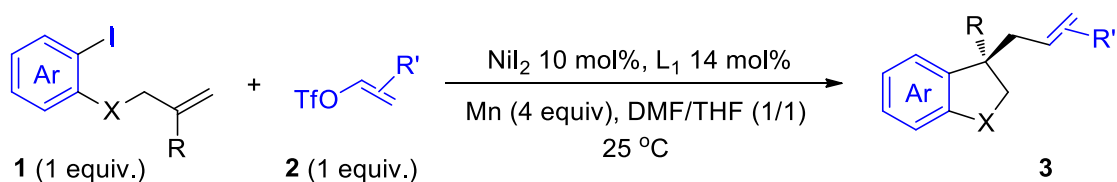

The procedure was conducted in an argon-filled glove box. To a reaction tube equipped with a magnetic stir bar was charged with  $\text{NiI}_2$  (6.3 mg, 0.020 mmol), **L1** (7.6 mg, 0.028 mmol),  $\text{Mn}$  (44.0 mg, 0.8 mmol), and DMF/THF (0.5 mL/0.5 mL). The reaction mixture was stirred for 5 min. Substrates **1** (0.2 mmol) and **2** (0.2 mmol) were then added. The reaction tube was sealed with a rubber septum, and removed from the glove box. The reaction mixture was stirred at 25 °C for 24 h. The reaction was quenched with water (20.0 mL), and extracted with ethyl acetate (3 × 15.0 mL). The combined organic layers were washed with water, brine, dried over anhydrous  $\text{Na}_2\text{SO}_4$ , and concentrated under reduced pressure. The residue was purified by flash chromatography on silica gel to afford the desired product **3**.

### 4.2. Characterization Data of Products

#### (*R*)-3-(cyclohex-1-en-1-ylmethyl)-3-methyl-2,3-dihydrobenzofuran (**3a**)

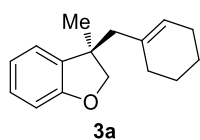

This compound was prepared according to the General procedure from the reaction of **1a** (54.8 mg, 0.2 mmol) and **2a** (46.0 mg, 0.2 mmol).

35.1 mg, 77% yield, 98% ee, colorless oil.

**Chiral HPLC:** CHIRALPAK IA, 25 °C,  $i\text{PrOH}$ -hexanes 0.2/99.8, 0.75 mL/min, 280 nm.  $t_R(\text{major}) = 9.1$  min,  $t_R(\text{minor}) = 11.1$  min.

$[\alpha]_D^{25} = -12$  ( $c = 1.0$ ,  $\text{CH}_2\text{Cl}_2$ ).

**$^1\text{H}$  NMR (400 MHz,  $\text{CDCl}_3$ ):**  $\delta$  7.13-7.07 (m, 2 H), 6.86 (dt,  $J = 0.8, 7.6$  Hz, 1 H), 6.77 (d,  $J = 8.0$  Hz, 1 H), 5.41 (s, 1 H), 4.47 (d,  $J = 8.4$  Hz, 1 H), 4.14 (d,  $J = 8.4$  Hz, 1 H), 2.33-2.25 (m, 2 H), 1.99 (s, 2 H), 1.78-1.61 (m, 2 H), 1.54-1.44 (m, 4 H), 1.31 (s, 3 H).

**$^{13}\text{C}$  NMR (100 MHz,  $\text{CDCl}_3$ ):**  $\delta$  159.2, 135.8, 134.6, 127.9, 125.9, 122.9, 120.2, 109.5, 82.3, 49.0, 45.5, 30.1, 26.3, 25.4, 23.0, 22.1.

**IR (neat,  $\text{cm}^{-1}$ ):** 2926, 2838, 1597, 1482, 1459, 1230, 1016, 980, 831, 747.

**HRMS (ESI):**  $[\text{M}+\text{H}]^+$  calcd for  $\text{C}_{16}\text{H}_{21}\text{O}$  229.1587, found 229.1597.

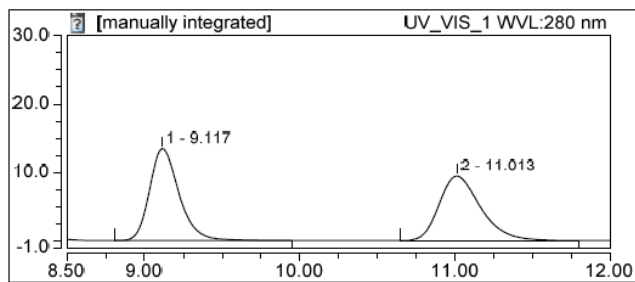

| Integration Results |                    |              |                 |
|---------------------|--------------------|--------------|-----------------|
| No.                 | Retention Time min | Area mAU*min | Relative Area % |
| 1                   | 9.117              | 2.961        | 50.28           |
| 2                   | 11.013             | 2.928        | 49.72           |
| Total:              |                    | 5.889        | 100.00          |

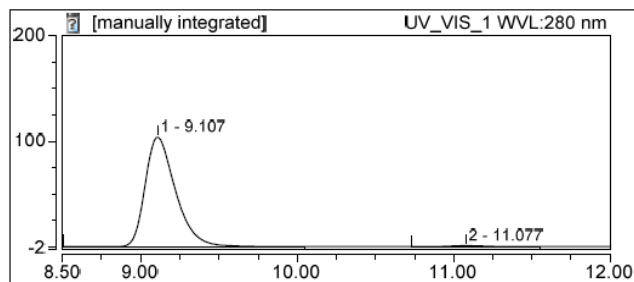

| Integration Results |                    |              |                 |
|---------------------|--------------------|--------------|-----------------|
| No.                 | Retention Time min | Area mAU*min | Relative Area % |
| 1                   | 9.107              | 23.346       | 98.82           |
| 2                   | 11.077             | 0.278        | 1.18            |
| Total:              |                    | 23.624       | 100.00          |

**(R)-3-(cyclopent-1-en-1-ylmethyl)-3-methyl-2,3-dihydrobenzofuran (3b)**

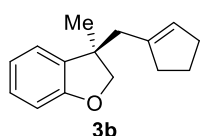

The compound was prepared according to the General procedure from the reaction of **1a** (54.8 mg, 0.2 mmol) and **2b** (43.2 mg, 0.2 mmol).

33.8 mg, 79% yield, 98% ee, colorless oil.

**Chiral HPLC:** CHIRALPAK IA, 25 °C, *i*PrOH-hexanes 0.2/99.8, 0.75 mL/min, 280 nm,  $t_R$ (major) = 10.5 min,  $t_R$ (minor) = 12.8 min.

$[\alpha]_D^{20} = +20$  (c = 1.0, CH<sub>2</sub>Cl<sub>2</sub>).

**<sup>1</sup>H NMR (400 MHz, CDCl<sub>3</sub>):** δ 7.13-7.07 (m, 2 H), 6.86 (d, *J* = 7.2 Hz, 1 H), 6.76 (d, *J* = 8.0 Hz, 1 H), 5.37 (t, *J* = 0.8 Hz, 1 H), 4.45 (d, *J* = 8.4 Hz, 1 H), 4.16 (d, *J* = 8.8 Hz, 1 H), 2.51-2.40 (m, 2 H), 2.28-2.24 (m, 2 H), 2.11-1.93 (m, 2 H), 1.82-1.74 (m, 2 H), 1.33 (s, 3 H).

**<sup>13</sup>C NMR (100 MHz, CDCl<sub>3</sub>):** δ 159.3, 140.8, 135.7, 128.5, 128.0, 122.8, 120.3, 109.5, 82.2, 45.3, 42.1, 36.4, 32.3, 26.5, 24.0.

**IR (neat, cm<sup>-1</sup>):** 3051, 2957, 2849, 1599, 1482, 1232, 1018, 980, 833, 747.

**HRMS (ESI):** [M+H]<sup>+</sup> calcd for C<sub>15</sub>H<sub>19</sub>O 215.1430, found 215.1438.

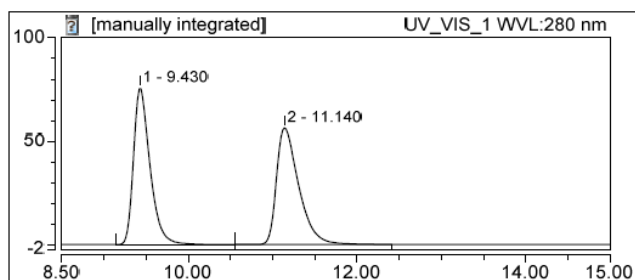

| Integration Results |                    |              |                 |
|---------------------|--------------------|--------------|-----------------|
| No.                 | Retention Time min | Area mAU*min | Relative Area % |
| 1                   | 9.430              | 17.117       | 49.99           |
| 2                   | 11.140             | 17.124       | 50.01           |
| Total:              |                    | 34.240       | 100.00          |

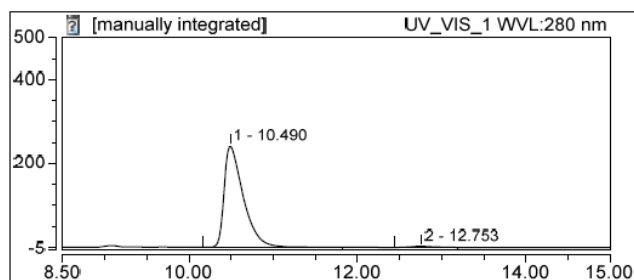

| Integration Results |                    |              |                 |
|---------------------|--------------------|--------------|-----------------|
| No.                 | Retention Time min | Area mAU*min | Relative Area % |
| 1                   | 10.490             | 63.790       | 98.75           |
| 2                   | 12.753             | 0.806        | 1.25            |
| Total:              |                    | 64.595       | 100.00          |

**(R)-3-((4,4-dimethylcyclohex-1-en-1-yl)methyl)-3-methyl-2,3-dihydrobenzofuran (3c)**

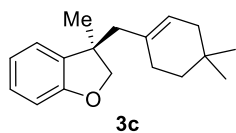

The compound was prepared according to the General Procedure from the reaction of **1a** (54.8 mg, 0.2 mmol) with **2c** (51.6 mg, 0.2 mmol).

36.9 mg, 72% yield, 99% ee, colorless oil.

**Chiral HPLC:** CHIRALPAK IA, 25 °C, *i*PrOH-hexanes 0.2/99.8, 0.75 mL/min, 280 nm,  $t_R$ (minor) = 8.1 min,  $t_R$ (major) = 8.6 min.

$[\alpha]_D^{20} = -5$  ( $c = 1.0$ , CH<sub>2</sub>Cl<sub>2</sub>).

**<sup>1</sup>H NMR (400 MHz, CDCl<sub>3</sub>):**  $\delta$  7.13-7.07 (m, 2 H), 6.86 (dt,  $J = 0.8$ , 7.2 Hz, 1 H), 6.75 (d,  $J = 8.0$  Hz, 1 H), 5.33 (s, 1 H), 4.48 (d,  $J = 8.8$  Hz, 1 H), 4.15 (d,  $J = 8.4$  Hz, 1 H), 2.34-2.27 (m, 2 H), 1.77-1.59 (m, 4 H), 1.32 (s, 3 H), 1.26-1.23 (m, 2 H), 0.85 (s, 3 H), 0.83 (s, 3 H).

**<sup>13</sup>C NMR (100 MHz, CDCl<sub>3</sub>):**  $\delta$  159.3, 135.8, 133.2, 127.9, 125.1, 122.9, 120.3, 109.5, 82.3, 48.9, 45.6, 39.6, 35.8, 28.9, 28.2, 27.8, 27.4, 26.4.

**IR (neat, cm<sup>-1</sup>):** 2956, 2920, 1613, 1482, 1459, 1232, 1018, 982, 833, 747.

**HRMS (ESI):**  $[M+H]^+$  calcd for C<sub>18</sub>H<sub>25</sub>O 257.1900, found 257.1896.

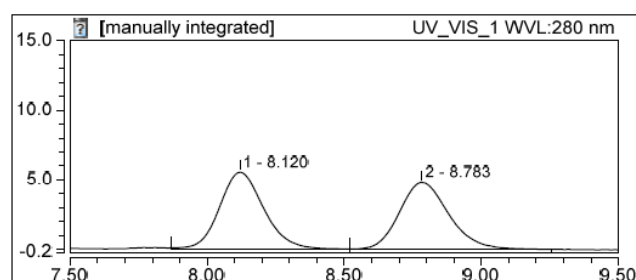

| Integration Results |                    |              |                 |
|---------------------|--------------------|--------------|-----------------|
| No.                 | Retention Time min | Area mAU*min | Relative Area % |
| 1                   | 8.120              | 1.048        | 51.08           |
| 2                   | 8.783              | 1.004        | 48.92           |
| Total:              |                    | 2.052        | 100.00          |

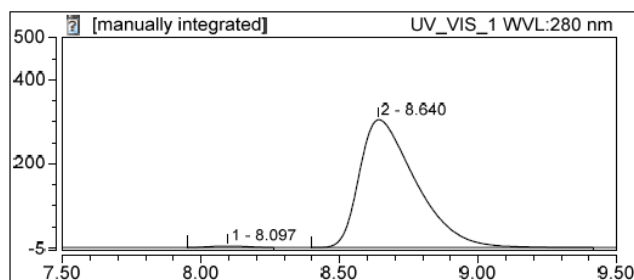

| Integration Results |                    |              |                 |
|---------------------|--------------------|--------------|-----------------|
| No.                 | Retention Time min | Area mAU*min | Relative Area % |
| 1                   | 8.097              | 0.525        | 0.73            |
| 2                   | 8.640              | 71.825       | 99.27           |
| Total:              |                    | 72.350       | 100.00          |

### (*R*)-3-(cyclohept-1-en-1-ylmethyl)-3-methyl-2,3-dihydrobenzofuran (**3d**)

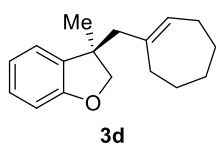

The compound was prepared according to the General Procedure from the reaction of **1a** (54.8 mg, 0.2 mmol) and **2d** (48.8 mg, 0.2 mmol).

31.5 mg, 65% yield, 97% ee, colorless oil.

**Chiral HPLC:** CHIRALPAK IA, 25 °C, *i*PrOH-hexanes 0.2/99.8, 0.75 mL/min, 279 nm,  $t_R$ (major) = 8.1 min,  $t_R$ (minor) = 9.9 min.

$[\alpha]_D^{19} = +2$  ( $c = 1.0$ , CH<sub>2</sub>Cl<sub>2</sub>).

**<sup>1</sup>H NMR (400 MHz, CDCl<sub>3</sub>):**  $\delta$  7.12-7.07 (m, 2 H), 6.85 (dt,  $J = 0.8$ , 7.6 Hz, 1 H), 6.76 (d,  $J = 8.0$  Hz, 1 H), 5.53 (t,  $J = 6.4$  Hz, 1 H), 4.51 (d,  $J = 8.4$  Hz, 1 H), 4.09 (d,  $J = 8.8$  Hz, 1 H), 2.35-2.27 (m, 2 H), 2.08-1.87 (m, 4 H), 1.69-1.65 (m, 2 H), 1.45-1.31 (m, 4 H), 1.33 (s, 3 H).

**$^{13}\text{C}$  NMR (100 MHz,  $\text{CDCl}_3$ ):**  $\delta$  159.4, 141.3, 135.6, 131.4, 127.9, 123.1, 120.2, 109.5, 81.8, 50.7, 45.9, 34.4, 32.5, 28.6, 27.0, 26.5, 26.1.

**IR (neat,  $\text{cm}^{-1}$ ):** 2922, 2846, 1597, 1482, 1450, 1230, 1016, 978, 831, 747.

**HRMS (ESI):**  $[\text{M}+\text{H}]^+$  calcd for  $\text{C}_{17}\text{H}_{23}\text{O}$  243.1743, found 243.1746.

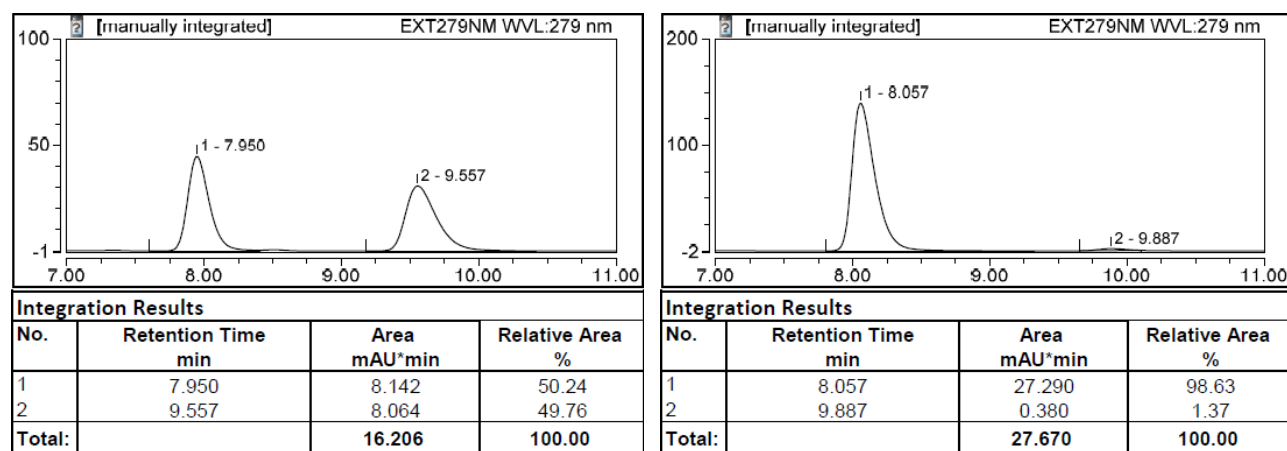

**(R,E)-3-(cyclooct-1-en-1-ylmethyl)-3-methyl-2,3-dihydrobenzofuran (3e)**

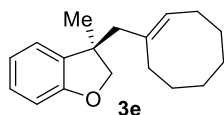

The compound was prepared according to the General Procedure from the reaction of **1a** (54.8 mg, 0.2 mmol) and **2e** (51.6 mg, 0.2 mmol).

21.5 mg, 42% yield, 97% ee, colorless oil.

**Chiral HPLC:** CHIRALPAK IA, 25 °C,  $i$ PrOH-hexanes 0.2/99.8, 0.75 mL/min, 280 nm,  $t_R$ (major) = 10.1 min,  $t_R$ (minor) = 15.5 min.

$[\alpha]_D^{19} = +2$  ( $c = 1.0$ ,  $\text{CH}_2\text{Cl}_2$ ).

**$^1\text{H}$  NMR (400 MHz,  $\text{CDCl}_3$ ):**  $\delta$  7.12-7.07 (m, 2 H), 6.87-6.83 (t,  $J = 7.2$  Hz, 1 H), 6.77 (d,  $J = 8.0$  Hz, 1 H), 5.35 (t,  $J = 8.0$  Hz, 1 H), 4.50 (d,  $J = 8.4$  Hz, 1 H), 4.14 (d,  $J = 8.4$  Hz, 1 H), 2.36-2.25 (m, 2 H), 2.10-1.90 (m, 4 H), 1.45-1.41 (m, 8 H), 1.33 (s, 3 H).

**$^{13}\text{C}$  NMR (100 MHz,  $\text{CDCl}_3$ ):**  $\delta$  159.3, 137.1, 135.8, 129.0, 127.9, 123.0, 120.2, 109.5, 82.1, 46.8, 45.7, 29.9, 29.6, 28.3, 26.7, 26.6, 26.0, 26.0.

**IR (neat,  $\text{cm}^{-1}$ ):** 2924, 2853, 1482, 1459, 1277, 1262, 1018, 980, 713, 751.

**HRMS (ESI):**  $[\text{M}+\text{H}]^+$  calcd for  $\text{C}_{18}\text{H}_{25}\text{O}$  257.1900, found 257.1902.

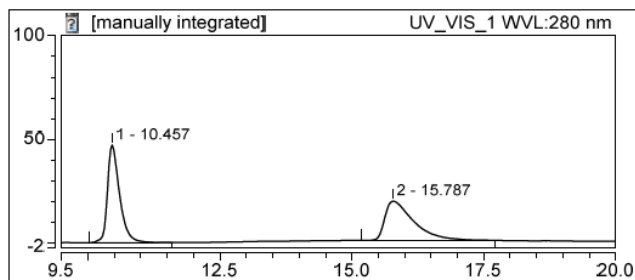

| Integration Results |                    |              |                 |
|---------------------|--------------------|--------------|-----------------|
| No.                 | Retention Time min | Area mAU*min | Relative Area % |
| 1                   | 10.457             | 12.553       | 51.09           |
| 2                   | 15.787             | 12.018       | 48.91           |
| Total:              |                    | 24.571       | 100.00          |

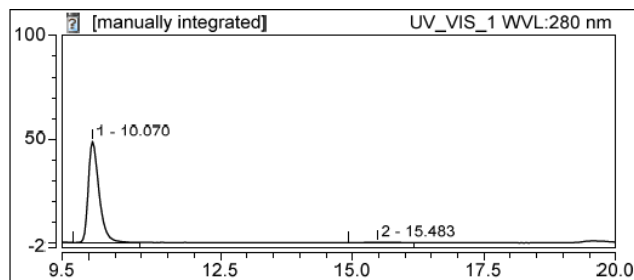

| Integration Results |                    |              |                 |
|---------------------|--------------------|--------------|-----------------|
| No.                 | Retention Time min | Area mAU*min | Relative Area % |
| 1                   | 10.070             | 11.539       | 98.68           |
| 2                   | 15.483             | 0.154        | 1.32            |
| Total:              |                    | 11.694       | 100.00          |

**(3R)-3-((4-(*tert*-butyl)cyclohex-1-en-1-yl)methyl)-3-methyl-2,3-dihydrobenzofuran (3f)**

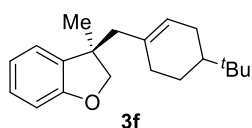

The compound was prepared according to the General Procedure from the reaction of **1a** (54.8 mg, 0.2 mmol) and **2f** (57.2 mg, 0.2 mmol).

31.8 mg, 56% yield, 98% ee, dr = 1.2/1, white solid, mp 34-36 °C.

**Chiral HPLC:** CHIRALCEL OD-H, 25 °C, *i*PrOH-hexanes 0.1/99.9, 0.4 mL/min, 280 nm.  $t_{R1}$ (major) = 24.2 min,  $t_{R1}$ (minor) = 30.3 min;  $t_{R2}$ (major) = 25.0 min,  $t_{R2}$ (minor) = 26.0 min.

$[\alpha]_D^{23} = +11$  (c = 1.0, CH<sub>2</sub>Cl<sub>2</sub>).

**<sup>1</sup>H NMR (400 MHz, CDCl<sub>3</sub>):** δ 7.13-7.07 (m, 2 H), 6.88-6.84 (m, 1 H), 6.77 (d, *J* = 8.0 Hz, 1 H), [5.43 (t, *J* = 2.4 Hz), 5.39 (d, *J* = 3.2 Hz), 1 H], 4.48-4.45 (m, 1 H), 4.16-4.12 (m, 1 H), 2.32-2.25 (m, 2 H), 2.04-1.68 (m, 5 H), 1.33-1.30 (m, 3 H), 1.20-1.07 (m, 2 H), 0.84 (s, 9 H).

**<sup>13</sup>C NMR (100 MHz, CDCl<sub>3</sub>):** δ 159.2, 136.0, 135.8, 134.5, 134.4, 127.93, 127.90, 126.3, 126.2, 122.9, 120.3, 120.2, 109.5, 82.3, 82.2, 48.6, 48.3, 45.6, 45.5, 43.83, 43.76, 32.1, 31.7, 31.6, 27.18, 27.15, 27.1, 26.4, 26.2, 24.5, 24.3.

**IR (neat, cm<sup>-1</sup>):** 3008, 2965, 1654, 1547, 1480, 1460, 1277, 1262, 767, 751.

**HRMS (ESI):** [M+Na]<sup>+</sup> calcd for C<sub>20</sub>H<sub>28</sub>ONa 302.2032, found 302.2034.

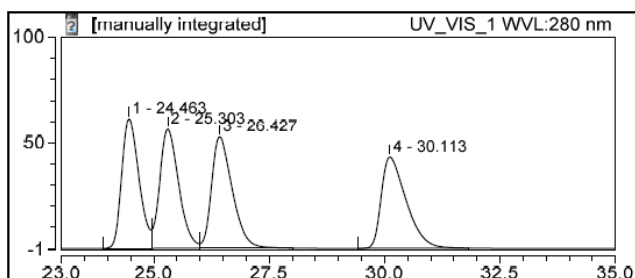

| Integration Results |                    |              |                 |
|---------------------|--------------------|--------------|-----------------|
| No.                 | Retention Time min | Area mAU*min | Relative Area % |
| 1                   | 24.463             | 26.570       | 24.59           |
| 2                   | 25.303             | 27.070       | 25.06           |
| 3                   | 26.427             | 27.504       | 25.46           |
| 4                   | 30.113             | 26.898       | 24.90           |
| Total:              |                    | 108.043      | 100.00          |

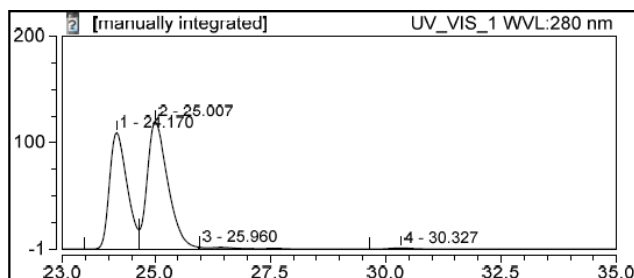

| Integration Results |                    |              |                 |
|---------------------|--------------------|--------------|-----------------|
| No.                 | Retention Time min | Area mAU*min | Relative Area % |
| 1                   | 24.170             | 48.208       | 43.22           |
| 2                   | 25.007             | 61.938       | 55.53           |
| 3                   | 25.960             | 0.933        | 0.84            |
| 4                   | 30.327             | 0.464        | 0.42            |
| Total:              |                    | 111.544      | 100.00          |

**(3R)-3-methyl-3-((1,2,3,6-tetrahydro-[1,1'-biphenyl]-4-yl)methyl)-2,3-dihydrobenzofuran (3g)**

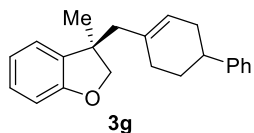

The compound was prepared according to the General Procedure from the reaction of **1a** (54.8 mg, 0.2 mmol) and **2g** (61.2 mg, 0.2 mmol).

34.7 mg, 57% yield, 98% ee, dr = 1.1:1, white solid, mp: 69-71°C.

**Chiral HPLC:** CHIRALPAK IB, 25 °C, *i*PrOH-hexanes 0.2/99.8, 1 mL/min, 203 nm.  $t_{R1}$ (minor) = 17.0 min,  $t_{R1}$ (major) = 21.5 min;  $t_{R2}$ (minor) = 18.0 min,  $t_{R2}$ (major) = 18.8 min.

$[\alpha]_D^{23} = +12$  (c = 1.0, CH<sub>2</sub>Cl<sub>2</sub>).

**<sup>1</sup>H NMR (400 MHz, CDCl<sub>3</sub>):** δ 7.30-7.09 (m, 7 H), 6.89-6.85 (t, *J* = 7.2 Hz, 1 H), 6.80-6.76 (m, 1 H), [5.52 (d, *J* = 2.4 Hz), 5.48 (d, *J* = 1.2 Hz), 1 H), 4.50 (d, *J* = 8.4 Hz, 1 H), 4.17 (t, *J* = 8.4 Hz, 1 H), 2.71-2.67 (m, 1 H), 2.37-1.63 (m, 8 H), 1.34 (d, *J* = 6.4 Hz, 3 H).

**<sup>13</sup>C NMR (100 MHz, CDCl<sub>3</sub>):** δ 159.2, 147.0, 146.9, 135.7, 135.6, 134.6, 134.5, 128.29, 128.26, 128.01, 127.96, 126.82, 126.78, 125.92, 125.90, 125.6, 125.5, 122.9, 120.3, 109.5, 82.2, 48.7, 48.5, 45.6, 45.4, 39.7, 39.5, 33.8, 33.4, 30.8, 30.3, 30.1, 30.0, 26.4, 26.2.

**IR (neat, cm<sup>-1</sup>):** 3407, 2917, 1655, 1482, 1459, 1277, 1262, 1016, 751, 699.

**HRMS (ESI):** [M+Na]<sup>+</sup> calcd for C<sub>22</sub>H<sub>24</sub>NaO 327.1719, found 327.1720.

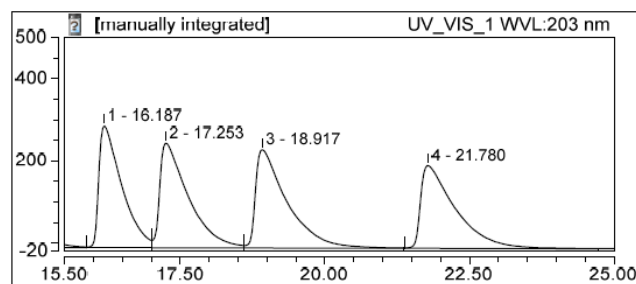

| Integration Results |                    |              |                 |
|---------------------|--------------------|--------------|-----------------|
| No.                 | Retention Time min | Area mAU*min | Relative Area % |
| 1                   | 16.187             | 135.708      | 23.69           |
| 2                   | 17.253             | 145.632      | 25.43           |
| 3                   | 18.917             | 151.248      | 26.41           |
| 4                   | 21.780             | 140.146      | 24.47           |
| Total:              |                    | 572.733      | 100.00          |

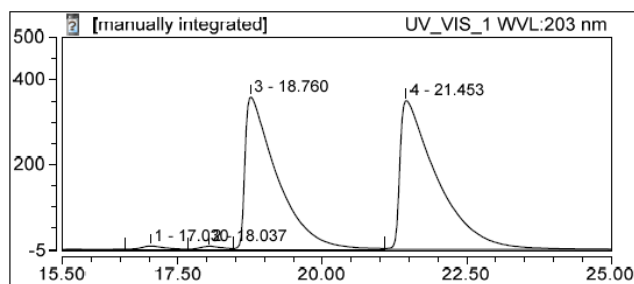

| Integration Results |                    |              |                 |
|---------------------|--------------------|--------------|-----------------|
| No.                 | Retention Time min | Area mAU*min | Relative Area % |
| 1                   | 17.030             | 3.704        | 0.74            |
| 2                   | 18.037             | 3.169        | 0.63            |
| 3                   | 18.760             | 232.358      | 46.25           |
| 4                   | 21.453             | 263.191      | 52.38           |
| Total:              |                    | 502.424      | 100.00          |

**(R)-8-((3-methyl-2,3-dihydrobenzofuran-3-yl)methyl)-1,4-dioxaspiro[4.5]dec-7-ene (3h)**

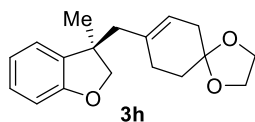

The compound was prepared according to the General Procedure from the reaction of **1a** (54.8 mg, 0.2 mmol) and **2h** (57.6 mg, 0.2 mmol) in DMF.

46.9 mg, 82% yield, 98% ee, colorless oil.

**Chiral HPLC:** CHIRALCEL OJ-H, 25 °C, *i*PrOH-hexanes 4/96, 0.8 mL/min, 281 nm,  $t_R$ (major) = 16.7 min,  $t_R$ (minor) = 18.7 min.

$[\alpha]_D^{22} = -7$  (c = 1.0, CH<sub>2</sub>Cl<sub>2</sub>).

**<sup>1</sup>H NMR (400 MHz, CDCl<sub>3</sub>):** δ 7.13-7.07 (m, 2 H), 6.86 (t, *J* = 7.2 Hz, 1 H), 6.77 (d, *J* = 8.0 Hz, 1

H), 5.31 (s, 1 H), 4.45 (d,  $J = 8.8$  Hz, 1 H), 4.16 (d,  $J = 8.4$  Hz, 1 H), 3.97-3.93 (m, 4 H), 2.37-2.29 (m, 2 H), 2.26 (s, 2 H), 2.01-1.89 (m, 2 H), 1.67-1.63 (m, 2 H), 1.33 (s, 3 H).

**$^{13}\text{C}$  NMR (100 MHz,  $\text{CDCl}_3$ ):**  $\delta$  159.2, 135.5, 134.3, 128.0, 123.04, 122.95, 120.3, 109.6, 107.6, 82.4, 64.3, 47.7, 45.5, 35.8, 31.2, 29.1, 25.9.

**IR (neat,  $\text{cm}^{-1}$ ):** 2956, 2883, 1597, 1482, 1243, 1116, 1060, 1016, 833, 753.

**HRMS (ESI):**  $[\text{M}+\text{H}]^+$  calcd for  $\text{C}_{18}\text{H}_{23}\text{O}_3$  287.1642, found 287.1643.

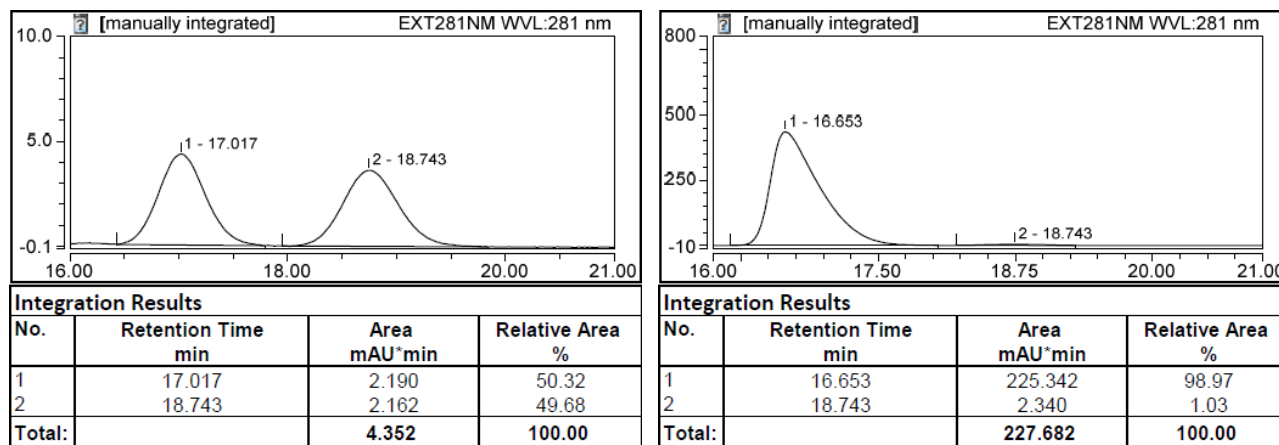

**(*R*)-3-((3,6-dihydro-2*H*-pyran-4-yl)methyl)-3-methyl-2,3-dihydrobenzofuran (3i)**

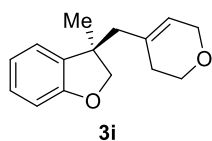

The compound was prepared according to the General Procedure from the reaction of **1a** (54.8 mg, 0.2 mmol) and **2i** (46.4 mg, 0.2 mmol) in DMF. 30.8 mg, 67% yield, 98% ee, colorless oil.

**Chiral HPLC:** CHIRALPAK IA, 25 °C,  $i$ PrOH-hexanes 5/95, 1 mL/min, 280 nm,  $t_R$ (major) = 5.6 min,  $t_R$ (minor) = 6.2 min.

$[\alpha]_D^{21} = +1$  ( $c = 1.0$ ,  $\text{CH}_2\text{Cl}_2$ ).

**$^1\text{H}$  NMR (400 MHz,  $\text{CDCl}_3$ ):**  $\delta$  7.14-7.08 (m, 2 H), 6.88-6.84 (dt,  $J = 0.8, 7.2$  Hz, 1 H), 6.77 (d,  $J = 8.0$  Hz, 1 H), 5.40 (s, 1 H), 4.46 (d,  $J = 8.8$  Hz, 1 H), 4.16 (d,  $J = 8.4$  Hz, 1 H), 4.10-4.06 (m, 2 H), 3.69-3.59 (m, 2 H), 2.38-2.30 (m, 2 H), 1.86-1.74 (m, 2 H), 1.35 (s, 3 H).

**$^{13}\text{C}$  NMR (100 MHz,  $\text{CDCl}_3$ ):**  $\delta$  159.3, 135.2, 132.6, 128.1, 124.4, 122.9, 120.3, 109.6, 82.0, 65.4, 64.2, 48.2, 45.4, 30.2, 26.2.

**IR (neat,  $\text{cm}^{-1}$ ):** 2962, 2752, 1722, 1597, 1481, 1235, 1128, 978, 832, 752.

**HRMS (ESI):**  $[\text{M}+\text{H}]^+$  calcd for  $\text{C}_{15}\text{H}_{19}\text{O}_2$  231.1380, found 231.1381.



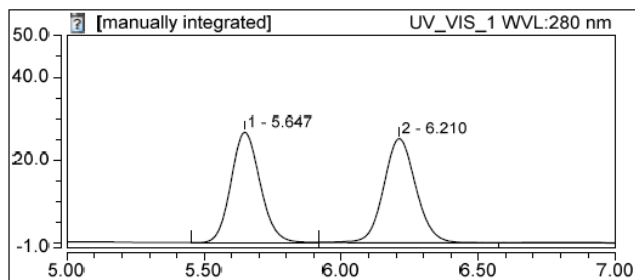

| Integration Results |                    |              |                 |
|---------------------|--------------------|--------------|-----------------|
| No.                 | Retention Time min | Area mAU*min | Relative Area % |
| 1                   | 5.647              | 3.287        | 48.89           |
| 2                   | 6.210              | 3.436        | 51.11           |
| Total:              |                    | 6.723        | 100.00          |

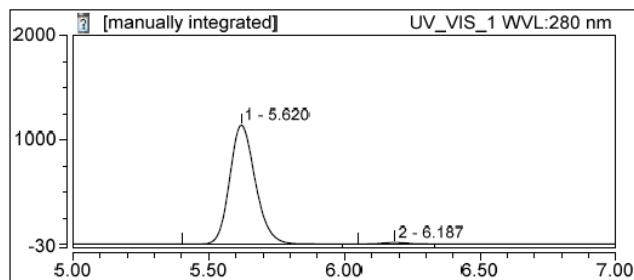

| Integration Results |                    |              |                 |
|---------------------|--------------------|--------------|-----------------|
| No.                 | Retention Time min | Area mAU*min | Relative Area % |
| 1                   | 5.620              | 124.961      | 98.76           |
| 2                   | 6.187              | 1.571        | 1.24            |
| Total:              |                    | 126.532      | 100.00          |

**(R)-3-((3,6-dihydro-2H-thiopyran-4-yl)methyl)-3-methyl-2,3-dihydrobenzofuran (3j)**

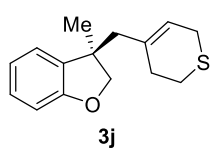

The compound was prepared according to the General Procedure from the reaction of **1a** (54.8 mg, 0.2 mmol) and **2j** (49.6 mg, 0.2 mmol) in DMF.

32.0 mg, 65% yield, 96% ee, colorless oil.

**Chiral HPLC:** CHIRALCEL OJ-H, 25 °C, *i*PrOH-hexanes 2/98, 1 mL/min, 260 nm,  $t_R$ (major) = 12.0 min,  $t_R$ (minor) = 13.2 min.

$[\alpha]_D^{21} = -17$  ( $c = 1.0$ , CH<sub>2</sub>Cl<sub>2</sub>).

**<sup>1</sup>H NMR (400 MHz, CDCl<sub>3</sub>):**  $\delta$  7.14-7.07 (m, 2 H), 6.87 (dt,  $J = 0.8, 7.6$  Hz, 1 H), 6.78 (d,  $J = 8.0$  Hz, 1 H), 5.57 (s, 1 H), 4.45 (d,  $J = 8.8$  Hz, 1 H), 4.14 (d,  $J = 8.8$  Hz, 1 H), 3.19-3.09 (m, 2 H), 2.64-2.53 (m, 2 H), 2.36-2.27 (m, 2 H), 2.04-1.88 (m, 2 H), 1.34 (s, 3 H).

**<sup>13</sup>C NMR (100 MHz, CDCl<sub>3</sub>):**  $\delta$  159.3, 135.6, 135.1, 128.2, 123.0, 122.5, 120.3, 109.7, 82.1, 49.8, 45.6, 30.8, 26.0, 25.7, 25.1.

**IR (neat, cm<sup>-1</sup>):** 2961, 2883, 1663, 1596, 1480, 1230, 1017, 975, 831, 753.

**HRMS (ESI):**  $[M+H]^+$  calcd for C<sub>15</sub>H<sub>19</sub>OS 247.1151, found 247.1153.

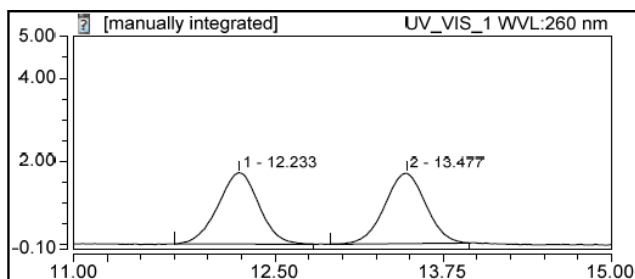

| Integration Results |                    |              |                 |
|---------------------|--------------------|--------------|-----------------|
| No.                 | Retention Time min | Area mAU*min | Relative Area % |
| 1                   | 12.233             | 0.605        | 50.23           |
| 2                   | 13.477             | 0.599        | 49.77           |
| Total:              |                    | 1.204        | 100.00          |

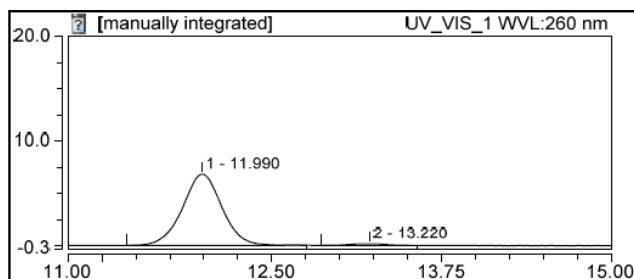

| Integration Results |                    |              |                 |
|---------------------|--------------------|--------------|-----------------|
| No.                 | Retention Time min | Area mAU*min | Relative Area % |
| 1                   | 11.990             | 2.302        | 97.78           |
| 2                   | 13.220             | 0.052        | 2.22            |
| Total:              |                    | 2.354        | 100.00          |

**(R)-4-((3-methyl-2,3-dihydrobenzofuran-3-yl)methyl)-1-tosyl-1,2,3,6-tetrahydropyridine (3k)**

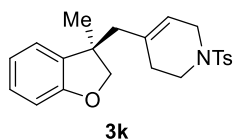

The compound was prepared according to the General Procedure from the reaction of **1a** (54.8 mg, 0.2 mmol) and **2k** (77.0 mg, 0.2 mmol).

59.7 mg, 78% yield, 98% ee, white solid, mp: 87-89 °C.

**Chiral HPLC:** CHIRALPAK ID, 25 °C, *i*PrOH-hexanes 8/92, 1 mL/min, 203 nm,  $t_R$ (minor) = 56.5 min,  $t_R$ (major) = 57.8 min.

$[\alpha]_D^{23} = -8$  ( $c = 1.0$ ,  $\text{CH}_2\text{Cl}_2$ ).

**$^1\text{H}$  NMR (400 MHz,  $\text{CDCl}_3$ ):**  $\delta$  7.64 (d,  $J = 8.4$  Hz, 2 H), 7.31 (d,  $J = 8.0$  Hz, 2 H), 7.12-7.08 (m, 1 H), 7.02 (dd,  $J = 0.8, 7.2$  Hz, 1 H), 6.84 (dt,  $J = 0.8, 7.6$  Hz, 1 H), 6.73 (d,  $J = 8.0$  Hz, 1 H), 5.29 (s, 1 H), 4.35 (d,  $J = 8.4$  Hz, 1 H), 4.08 (d,  $J = 8.8$  Hz, 1 H), 3.61-3.47 (m, 2 H), 3.12-2.94 (m, 2 H), 2.42 (s, 3 H), 2.32-2.24 (m, 2 H), 1.94-1.78 (m, 2 H), 1.28 (s, 3 H).

**$^{13}\text{C}$  NMR (100 MHz,  $\text{CDCl}_3$ ):**  $\delta$  159.2, 143.5, 134.8, 133.5, 133.2, 129.6, 128.2, 127.6, 122.8, 121.0, 120.4, 109.6, 81.7, 47.9, 45.3, 44.7, 42.8, 29.9, 26.0, 21.4.

**IR (neat,  $\text{cm}^{-1}$ ):** 2963, 2922, 1597, 1482, 1344, 1165, 1094, 952, 754, 688.

**HRMS (ESI):**  $[\text{M}+\text{H}]^+$  calcd for  $\text{C}_{22}\text{H}_{26}\text{NO}_3\text{S}$  384.1628, found 384.1627.

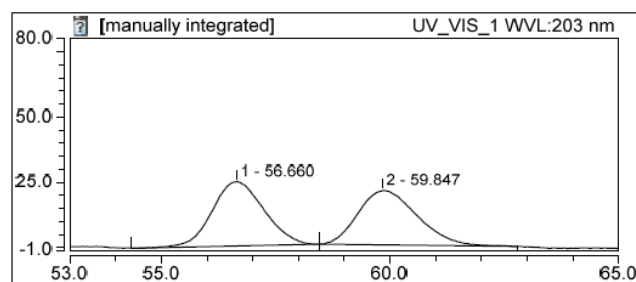

| Integration Results |                    |              |                 |
|---------------------|--------------------|--------------|-----------------|
| No.                 | Retention Time min | Area mAU*min | Relative Area % |
| 1                   | 56.660             | 32.330       | 50.86           |
| 2                   | 59.847             | 31.232       | 49.14           |
| Total:              |                    | 63.563       | 100.00          |

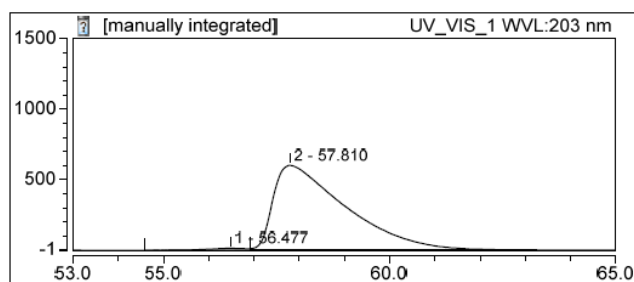

| Integration Results |                    |              |                 |
|---------------------|--------------------|--------------|-----------------|
| No.                 | Retention Time min | Area mAU*min | Relative Area % |
| 1                   | 56.477             | 11.633       | 1.03            |
| 2                   | 57.810             | 1113.654     | 98.97           |
| Total:              |                    | 1125.286     | 100.00          |

### ***Tert*-butyl (*R*)-4-((3-methyl-2,3-dihydrobenzofuran-3-yl)methyl)-3,6-dihydropyridine-1(2*H*)-carboxylate (**3l**)**

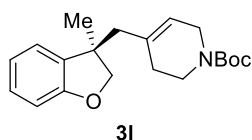

The compound was prepared according to the General Procedure from the reaction of **1a** (54.8 mg, 0.2 mmol) and **2l** (66.2 mg, 0.2 mmol).

52.0 mg, 79% yield, 96% ee, colorless oil.

**Chiral HPLC:** CHIRALCEL OJ-H, 25 °C, *i*PrOH-hexanes 2/98, 1 mL/min, 260 nm,  $t_R$ (major) = 12.4 min,  $t_R$ (minor) = 17.0 min.

$[\alpha]_D^{23} = -6$  ( $c = 1.0$ ,  $\text{CH}_2\text{Cl}_2$ ).

**$^1\text{H}$  NMR (400 MHz,  $\text{CDCl}_3$ ):**  $\delta$  7.14-7.06 (m, 2 H), 6.86 (dt,  $J = 0.8, 7.6$  Hz, 1 H), 6.77 (d,  $J = 8.0$

Hz, 1 H), 5.34 (s, 1 H), 4.44 (d,  $J = 8.4$  Hz, 1 H), 4.14 (d,  $J = 8.8$  Hz, 1 H), 3.91-3.76 (m, 2 H), 3.41 (s, 1 H), 3.29-3.23 (m, 1 H), 2.38-2.31 (m, 2 H), 1.82-1.76 (m, 2 H), 1.45 (s, 9 H), 1.34 (s, 3 H).

**$^{13}\text{C}$  NMR (100 MHz,  $\text{CDCl}_3$ ):**  $\delta$  159.2, 154.9, 135.0, 133.6, 128.2, 122.9, 122.3, 120.4, 109.6, 81.9, 79.4, 48.3, 45.5, 43.5, 40.9, 30.0, 28.4, 26.1.

**IR (neat,  $\text{cm}^{-1}$ ):** 2976, 2932, 1698, 1481, 1420, 1366, 1172, 980, 845, 753.

**HRMS (ESI):**  $[\text{M}+\text{H}]^+$  calcd for  $\text{C}_{20}\text{H}_{28}\text{NO}_3$  330.2064, found 330.2062.

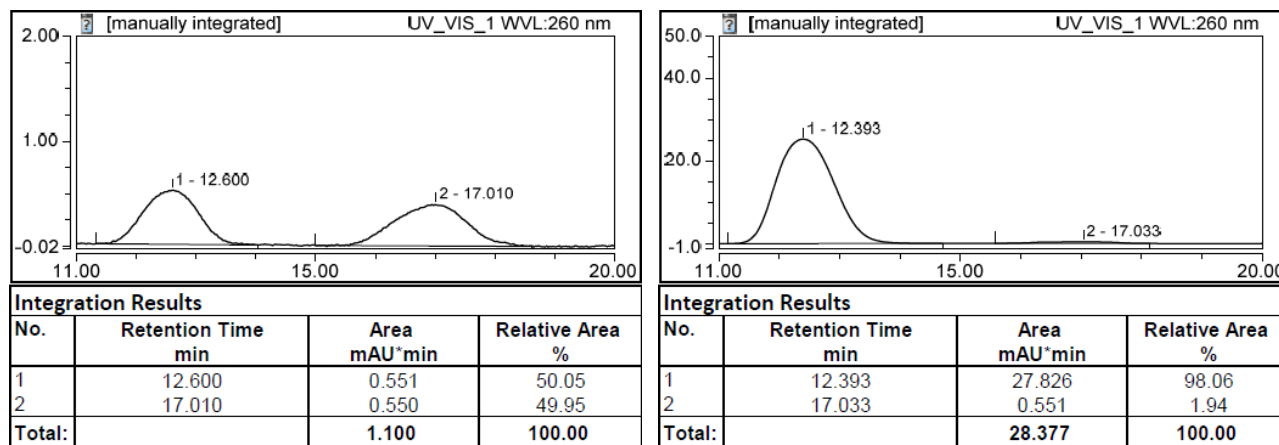

**(*R*)-3-((1*H*-inden-2-yl)methyl)-3-methyl-2,3-dihydrobenzofuran (3m)**

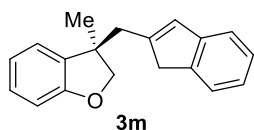

The compound was prepared according to the General Procedure from the reaction of **1a** (54.8 mg, 0.2 mmol) and **2m** (52.8 mg, 0.2 mmol) in DMF. 37.2 mg, 71% yield, 96% ee, colorless oil.

**Chiral HPLC:** CHIRALCEL OD-H, 25 °C,  $i$ PrOH-hexanes 5/95, 1 mL/min, 280 nm,  $t_R$ (major) = 6.2 min,  $t_R$ (minor) = 6.8 min.

$[\alpha]_D^{22} = +66$  ( $c = 1.0$ ,  $\text{CH}_2\text{Cl}_2$ ).

**$^1\text{H}$  NMR (400 MHz,  $\text{CDCl}_3$ ):**  $\delta$  7.30-7.07 (m, 6 H), 6.89 (dt,  $J = 1.2, 7.6$  Hz, 1 H), 6.76 (d,  $J = 8.0$  Hz, 1 H), 6.52 (m, 1 H), 4.52 (d,  $J = 8.8$  Hz, 1 H), 4.19 (d,  $J = 8.4$  Hz, 1 H), 3.15-2.95 (m, 2 H), 2.81 (s, 2 H), 1.41 (s, 3 H).

**$^{13}\text{C}$  NMR (100 MHz,  $\text{CDCl}_3$ ):**  $\delta$  159.3, 145.8, 144.8, 143.4, 134.9, 130.4, 128.3, 126.2, 124.0, 123.3, 122.8, 120.5, 120.1, 109.7, 81.8, 45.8, 42.4, 42.1, 26.5.

**IR (neat,  $\text{cm}^{-1}$ ):** 2962, 2885, 1610, 1481, 1392, 1265, 1101, 978, 831, 752.

**HRMS (ESI):**  $[\text{M}+\text{H}]^+$  calcd for  $\text{C}_{19}\text{H}_{19}\text{O}$  263.1430, found 263.1431.

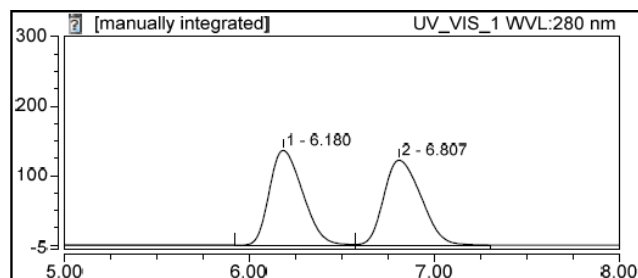

| Integration Results |                    |              |                 |
|---------------------|--------------------|--------------|-----------------|
| No.                 | Retention Time min | Area mAU*min | Relative Area % |
| 1                   | 6.180              | 28.276       | 49.98           |
| 2                   | 6.807              | 28.295       | 50.02           |
| Total:              |                    | 56.572       | 100.00          |

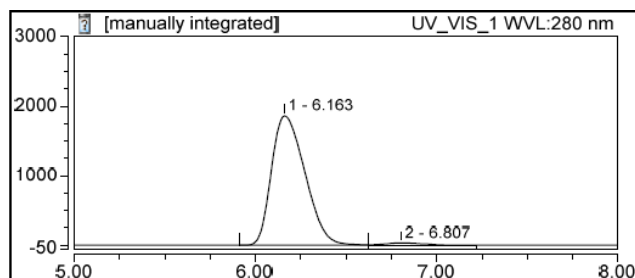

| Integration Results |                    |              |                 |
|---------------------|--------------------|--------------|-----------------|
| No.                 | Retention Time min | Area mAU*min | Relative Area % |
| 1                   | 6.163              | 398.223      | 98.11           |
| 2                   | 6.807              | 7.687        | 1.89            |
| Total:              |                    | 405.910      | 100.00          |

**(R)-3-((3,4-dihydronaphthalen-1-yl)methyl)-3-methyl-2,3-dihydrobenzofuran (3n)**

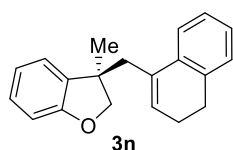

The compound was prepared according to the General Procedure from the reaction of **1a** (49 mg, 0.2 mmol) and **2n** (55.6 mg, 0.2 mmol) in DMF.

39.7 mg, 72% yield, 97% ee, colorless oil.

**Chiral HPLC:** CHIRALCEL OJ-H, 25 °C, *i*PrOH-hexanes 5/95, 1 mL/min, 260 nm,  $t_R$ (minor) = 11.5 min,  $t_R$ (major) = 15.3 min.

$[\alpha]_D^{22} = -25$  ( $c = 1.0$ , CH<sub>2</sub>Cl<sub>2</sub>).

**<sup>1</sup>H NMR (400 MHz, CDCl<sub>3</sub>):**  $\delta$  7.23-7.19 (m, 1 H), 7.12-7.05 (m, 5 H), 6.82-6.75 (m, 2 H), 5.72 (t,  $J = 4.8$  Hz, 1 H), 4.47 (d,  $J = 8.8$  Hz, 1 H), 4.00 (d,  $J = 8.8$  Hz, 1 H), 2.85-2.67 (m, 4 H), 2.20-2.15 (m, 2 H), 1.31 (s, 3 H).

**<sup>13</sup>C NMR (100 MHz, CDCl<sub>3</sub>):**  $\delta$  159.4, 136.5, 135.5, 135.4, 133.1, 129.4, 128.0, 127.5, 126.5, 126.1, 123.1, 123.0, 120.2, 109.6, 82.1, 46.1, 41.7, 28.6, 25.0, 23.2.

**IR (neat, cm<sup>-1</sup>):** 2963, 2881, 1655, 1597, 1480, 1234, 1016, 975, 833, 744.

**HRMS (ESI):**  $[M+K]^+$  calcd for C<sub>20</sub>H<sub>20</sub>OK 315.1146, found 315.1145.

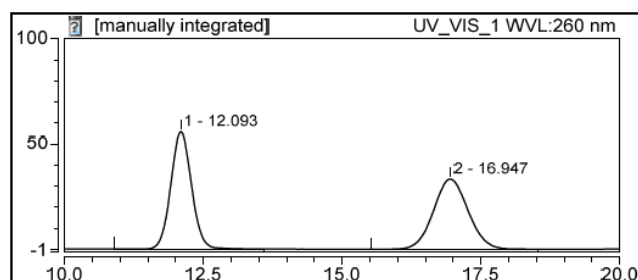

| Integration Results |                    |              |                 |
|---------------------|--------------------|--------------|-----------------|
| No.                 | Retention Time min | Area mAU*min | Relative Area % |
| 1                   | 12.093             | 24.237       | 49.91           |
| 2                   | 16.947             | 24.321       | 50.09           |
| Total:              |                    | 48.558       | 100.00          |

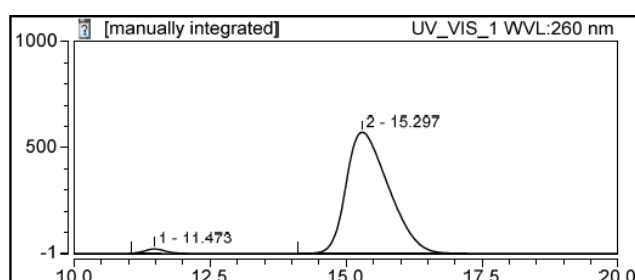

| Integration Results |                    |              |                 |
|---------------------|--------------------|--------------|-----------------|
| No.                 | Retention Time min | Area mAU*min | Relative Area % |
| 1                   | 11.473             | 8.712        | 1.66            |
| 2                   | 15.297             | 516.295      | 98.34           |
| Total:              |                    | 525.007      | 100.00          |

**(R)-3-methyl-3-(2-methyleneheptyl)-2,3-dihydrobenzofuran (3o)**

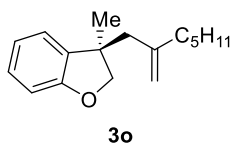

The compound was prepared according to the General Procedure from the reaction of **1a** (109.6 mg, 0.4 mmol) and **2o** (49.2 mg, 0.2 mmol) in THF. 34.6 mg, 71% yield, 90% ee, colorless oil.

**Chiral HPLC:** CHIRALPAK IB, 25 °C, *i*PrOH-hexanes 0.2/99.8, 0.75 mL/min, 280 nm,  $t_R$ (major) = 7.3 min,  $t_R$ (minor) = 11.6 min.

$[\alpha]_D^{20} = +8$  ( $c = 1.0$ , CH<sub>2</sub>Cl<sub>2</sub>).

**<sup>1</sup>H NMR (400 MHz, CDCl<sub>3</sub>):**  $\delta$  7.13-7.09 (m, 2 H), 6.88-6.84 (m, 1 H), 6.77 (d,  $J = 8.0$  Hz, 1 H), 4.85 (d,  $J = 1.6$  Hz, 1 H), 4.70 (s, 1H), 4.50 (d,  $J = 8.4$  Hz, 1 H), 4.16 (d,  $J = 8.8$  Hz, 1 H), 2.44-2.32 (m, 2 H), 1.84-1.68 (m, 2 H), 1.38-1.14 (m, 9 H), 0.86 (t,  $J = 7.2$  Hz, 3 H).

**<sup>13</sup>C NMR (100 MHz, CDCl<sub>3</sub>):**  $\delta$  159.2, 146.6, 135.5, 128.0, 122.9, 120.3, 113.4, 109.6, 82.0, 46.3, 45.3, 37.0, 31.5, 27.6, 26.3, 22.5, 14.0.

**IR (neat, cm<sup>-1</sup>):** 2958, 2876, 1638, 1599, 1482, 1232, 1018, 982, 896, 747.

**HRMS (ESI):**  $[M+H]^+$  calcd for C<sub>17</sub>H<sub>25</sub>O 245.1900, found 245.1902.

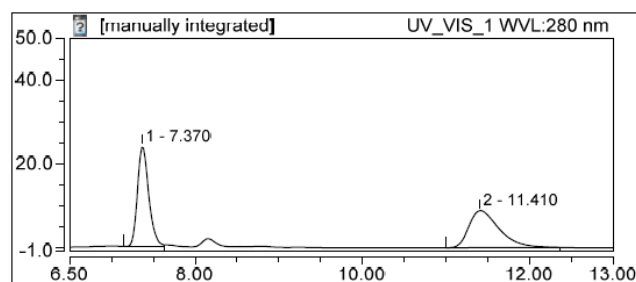

| Integration Results |                    |              |                 |
|---------------------|--------------------|--------------|-----------------|
| No.                 | Retention Time min | Area mAU*min | Relative Area % |
| 1                   | 7.370              | 3.754        | 50.28           |
| 2                   | 11.410             | 3.712        | 49.72           |
| Total:              |                    | 7.466        | 100.00          |

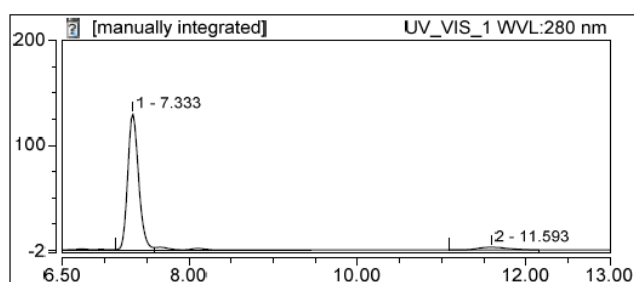

| Integration Results |                    |              |                 |
|---------------------|--------------------|--------------|-----------------|
| No.                 | Retention Time min | Area mAU*min | Relative Area % |
| 1                   | 7.333              | 19.423       | 94.94           |
| 2                   | 11.593             | 1.036        | 5.06            |
| Total:              |                    | 20.459       | 100.00          |

### Methyl (*R*)-6-((3-methyl-2,3-dihydrobenzofuran-3-yl)methyl)hept-6-enoate (**3p**)

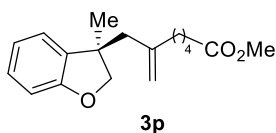

The compound was prepared according to the General Procedure from the reaction of **1a** (164.4 mg, 0.6 mmol) and **2p** (58.0 mg, 0.2 mmol). 32.8 mg, 57% yield, 92% ee, colorless oil.

**Chiral HPLC:** CHIRALPAK ID, 25 °C, *i*PrOH-hexanes 5/95, 1 mL/min, 203 nm,  $t_R$ (major) = 5.7 min,  $t_R$ (minor) = 6.4 min.

$[\alpha]_D^{20} = +4$  ( $c = 1.0$ , CH<sub>2</sub>Cl<sub>2</sub>).

**<sup>1</sup>H NMR (400 MHz, CDCl<sub>3</sub>):**  $\delta$  7.14-7.09 (m, 2 H), 6.87 (t,  $J = 7.2$  Hz, 1 H), 6.77 (d,  $J = 8.0$  Hz, 1 H), 4.86 (d,  $J = 0.8$  Hz, 1 H), 4.72 (s, 1 H), 4.50 (d,  $J = 8.8$  Hz, 1 H), 4.16 (d,  $J = 8.4$  Hz, 1 H), 3.66 (s, 3 H), 2.43-2.31 (m, 2 H), 2.27-2.23 (m, 2 H), 1.81-1.64 (m, 2 H), 1.56-1.42 (m, 2 H), 1.40-1.25

(m, 5 H).

**<sup>13</sup>C NMR (100 MHz, CDCl<sub>3</sub>):** δ 174.1, 159.3, 145.9, 135.3, 128.1, 122.8, 120.3, 113.9, 109.6, 81.9, 51.5, 46.3, 45.3, 36.5, 33.8, 27.3, 26.3, 24.4.

**IR (neat, cm<sup>-1</sup>):** 3006, 2959, 1739, 1482, 1459, 1276, 1262, 976, 776, 751.

**HRMS (ESI):** [M+H]<sup>+</sup> calcd for C<sub>18</sub>H<sub>25</sub>O<sub>3</sub> 289.1798, found 289.1800.

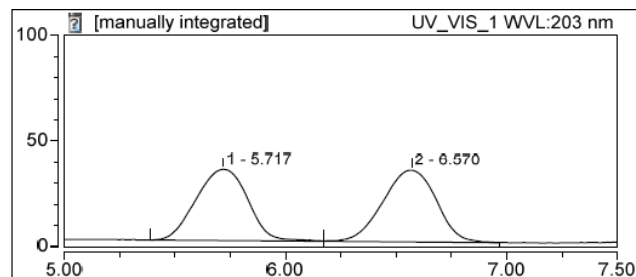

| Integration Results |                    |              |                 |
|---------------------|--------------------|--------------|-----------------|
| No.                 | Retention Time min | Area mAU*min | Relative Area % |
| 1                   | 5.717              | 9.172        | 49.02           |
| 2                   | 6.570              | 9.538        | 50.98           |
| Total:              |                    | 18.710       | 100.00          |

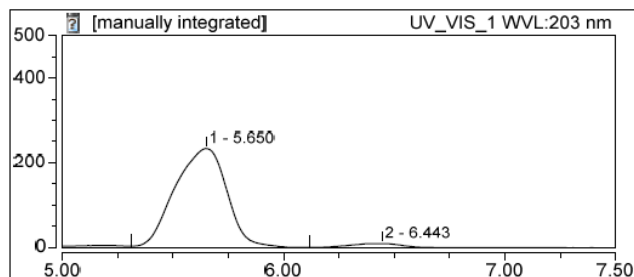

| Integration Results |                    |              |                 |
|---------------------|--------------------|--------------|-----------------|
| No.                 | Retention Time min | Area mAU*min | Relative Area % |
| 1                   | 5.650              | 64.017       | 95.96           |
| 2                   | 6.443              | 2.696        | 4.04            |
| Total:              |                    | 66.714       | 100.00          |

**(R)-6-((3-methyl-2,3-dihydrobenzofuran-3-yl)methyl)hept-6-en-1-yl acetate (3q)**

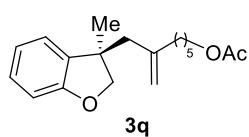

The compound was prepared according to the General Procedure from the reaction of **1a** (164.4 mg, 0.6 mmol) and **2q** (60.8 mg, 0.2 mmol).

34.6 mg, 54% yield, 93% ee, colorless oil.

**Chiral HPLC:** CHIRALPAK ID, 25 °C, <sup>i</sup>PrOH-hexanes 4/96, 1 mL/min, 280 nm, *t<sub>R</sub>*(major) = 6.0 min, *t<sub>R</sub>*(minor) = 6.6 min.

[α]<sub>D</sub><sup>20</sup> = +5 (c = 1.0, CH<sub>2</sub>Cl<sub>2</sub>).

**<sup>1</sup>H NMR (400 MHz, CDCl<sub>3</sub>):** δ 7.14-7.09 (m, 2 H), 6.86 (dt, *J* = 0.8, 7.2 Hz, 1 H), 6.77 (d, *J* = 8.0 Hz, 1 H), 4.85 (d, *J* = 1.2 Hz, 1 H), 4.72 (s, 1 H), 4.50 (d, *J* = 8.4 Hz, 1 H), 4.16 (d, *J* = 8.8 Hz, 1 H), 4.02 (t, *J* = 6.8 Hz, 2H), 2.43-2.31 (m, 2 H), 2.04 (s, 3 H), 1.84-1.64 (m, 2 H), 1.60-1.53 (m, 2 H), 1.40-1.19 (m, 7 H).

**<sup>13</sup>C NMR (100 MHz, CDCl<sub>3</sub>):** δ 171.2, 159.3, 146.1, 135.3, 128.1, 122.8, 120.3, 113.7, 109.6, 81.9, 64.5, 46.3, 45.3, 36.8, 28.4, 27.4, 26.3, 25.5, 21.0.

**IR (neat, cm<sup>-1</sup>):** 2939, 2866, 1739, 1597, 1482, 1366, 1239, 1046, 978, 751.

**HRMS (ESI):** [M+H]<sup>+</sup> calcd for C<sub>19</sub>H<sub>27</sub>O<sub>3</sub> 303.1955, found 303.1953.

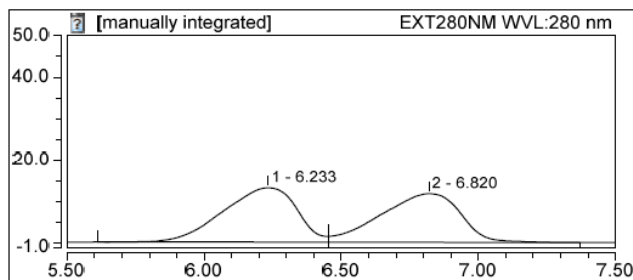

| Integration Results |                       |                 |                    |
|---------------------|-----------------------|-----------------|--------------------|
| No.                 | Retention Time<br>min | Area<br>mAU*min | Relative Area<br>% |
| 1                   | 6.233                 | 4.081           | 50.85              |
| 2                   | 6.820                 | 3.945           | 49.15              |
| Total:              |                       | 8.026           | 100.00             |

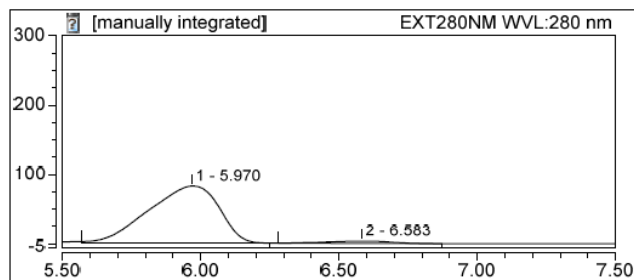

| Integration Results |                       |                 |                    |
|---------------------|-----------------------|-----------------|--------------------|
| No.                 | Retention Time<br>min | Area<br>mAU*min | Relative Area<br>% |
| 1                   | 5.970                 | 24.450          | 96.55              |
| 2                   | 6.583                 | 0.873           | 3.45               |
| Total:              |                       | 25.323          | 100.00             |

**(R)-5-(tert-butyl)-3-methyl-3-(2-propylpent-2-en-1-yl)-2,3-dihydrobenzofuran (3s)**

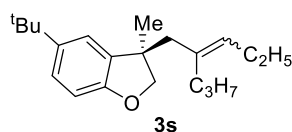

This compound was prepared according to the General Procedure from the reaction of **1b** (66.0 mg, 0.2 mmol) and **2s** (49.2mg, 0.2 mmol) in DMF.

18.0 mg, 30% yield, *E/Z* = 2.5/1, 91% ee, colorless oil. The *E*- and *Z*-isomers were determined by 1-D NOE experiments.

**Chiral HPLC:** CHIRALCEL OD-H, 25 °C, *i*PrOH-hexanes 0.4/99.6, 0.3 mL/min, 280 nm,  $t_{R1}$ (major) = 18.6 min,  $t_{R1}$ (minor) = 21.9 min;  $t_{R2}$ (major) = 19.4 min,  $t_{R2}$ (minor) = 20.9 min.

$[\alpha]_D^{23} = +33$  ( $c = 1.0$ , CH<sub>2</sub>Cl<sub>2</sub>).

**<sup>1</sup>H NMR (400 MHz, CDCl<sub>3</sub>):**  $\delta$  7.13 (td,  $J = 2.0$  Hz,  $J = 8.4$  Hz, 2 H), 7.20 (d,  $J = 8.4$  Hz, 1 H), 5.123 (t,  $J = 6.8$  Hz, 1 H), 4.47 (d,  $J = 8.4$  Hz, 1 H), 4.12 (d,  $J = 8.4$  Hz, 1 H), 2.40-2.21 (m, 2 H), 2.03-1.92 (m, 2 H), 1.87-1.58 (m, 2 H), 1.32-1.30 (m, 2 H), 1.32 (s, 3 H), 1.30 (s, 9 H), 0.92 (t,  $J = 7.6$  Hz, 3 H), 0.78 (t,  $J = 7.2$  Hz, 3 H).

**<sup>13</sup>C NMR (100 MHz, CDCl<sub>3</sub>):**  $\delta$  157.1, 143.2, 135.5, 135.1, 131.9, 124.6, 119.9, 108.6, 82.3, 46.7, 45.9, 40.0, 34.3, 31.8, 26.2, 21.7, 21.1, 14.6, 14.0.

**IR (neat, cm<sup>-1</sup>):** 2960, 2931, 1594, 1490, 1363, 1261, 1186, 1057, 989, 816.

**HRMS (ESI):**  $[M+H]^+$  calcd for C<sub>21</sub>H<sub>33</sub>O 301.2526, found 301.2533.

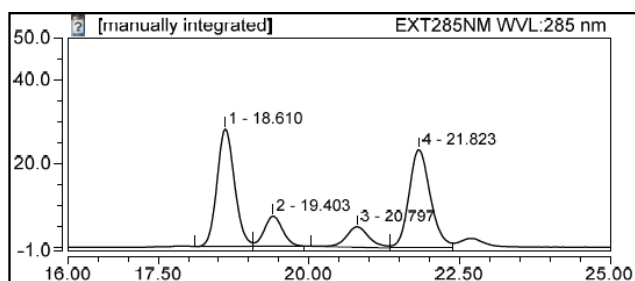

| Integration Results |                    |              |                 |
|---------------------|--------------------|--------------|-----------------|
| No.                 | Retention Time min | Area mAU*min | Relative Area % |
| 1                   | 18.610             | 9.506        | 39.79           |
| 2                   | 19.403             | 2.530        | 10.59           |
| 3                   | 20.797             | 2.145        | 8.98            |
| 4                   | 21.823             | 9.708        | 40.64           |
| Total:              |                    | 23.889       | 100.00          |

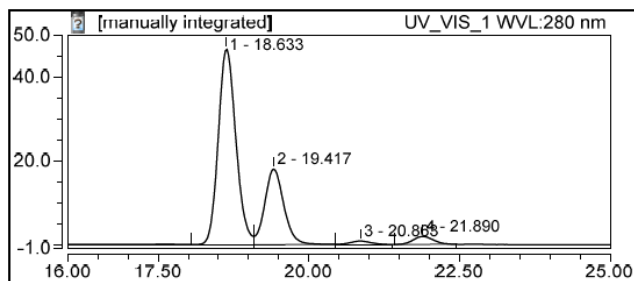

| Integration Results |                    |              |                 |
|---------------------|--------------------|--------------|-----------------|
| No.                 | Retention Time min | Area mAU*min | Relative Area % |
| 1                   | 18.633             | 15.919       | 67.28           |
| 2                   | 19.417             | 6.668        | 28.18           |
| 3                   | 20.863             | 0.328        | 1.39            |
| 4                   | 21.890             | 0.745        | 3.15            |
| Total:              |                    | 23.659       | 100.00          |

**(R)-5-(tert-butyl)-3-(2,3-dimethylbut-2-en-1-yl)-3-methyl-2,3-dihydrobenzofuran (3t)**

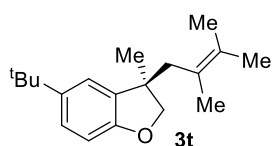

The compound was prepared according to the General Procedure from the reaction of **1b** (66.0 mg, 0.2 mmol) and **2t** (43.6 mg, 0.2 mmol) in DMF.

23.4 mg, 43% yield, 99.8% ee, colorless oil.

**Chiral HPLC:** CHIRALCEL OD-H, 25 °C, *i*PrOH-hexanes 0.4/99.6, 0.3 mL/min, 280 nm,  $t_R$ (minor) = 21.6 min,  $t_R$ (major) = 22.7 min.

$[\alpha]_D^{22} = +38$  (c = 1.0, CH<sub>2</sub>Cl<sub>2</sub>).

**<sup>1</sup>H NMR (400 MHz, CDCl<sub>3</sub>):** δ 7.13 (dd,  $J$  = 2.0 Hz,  $J$  = 8.0 Hz, 1 H), 7.20 (d,  $J$  = 2.0 Hz, 1 H), 7.08 (d,  $J$  = 8.4 Hz, 1 H), 4.37 (d,  $J$  = 8.4 Hz, 1 H), 4.09 (d,  $J$  = 8.4 Hz, 1 H), 2.61 (d,  $J$  = 13.6 Hz, 1 H), 2.23 (d,  $J$  = 13.6 Hz, 1 H), 1.63 (s, 3 H), 1.56 (s, 3 H), 1.41 (s, 3 H), 1.35 (s, 3 H), 1.28 (m, 9 H).

**<sup>13</sup>C NMR (100 MHz, CDCl<sub>3</sub>):** δ 157.2, 143.2, 135.0, 128.6, 124.6, 124.5, 120.2, 108.5, 83.4, 46.7, 44.5, 34.3, 31.8, 25.4, 20.9, 20.84, 20.82.

**IR (neat, cm<sup>-1</sup>):** 2961, 2917, 1738, 1648, 1490, 1462, 1262, 1057, 993, 815.

**HRMS (ESI):** [M+H]<sup>+</sup> calcd for C<sub>19</sub>H<sub>29</sub>O 273.2213, found 273.2219.

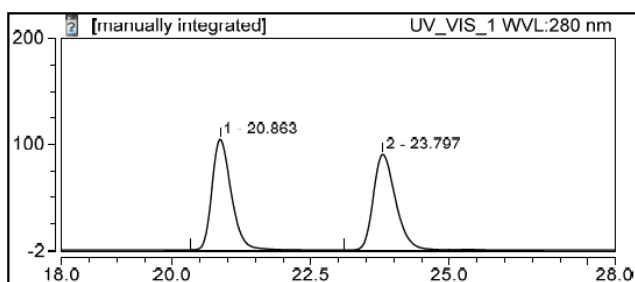

| Integration Results |                    |              |                 |
|---------------------|--------------------|--------------|-----------------|
| No.                 | Retention Time min | Area mAU*min | Relative Area % |
| 1                   | 20.863             | 42.465       | 50.20           |
| 2                   | 23.797             | 42.119       | 49.80           |
| Total:              |                    | 84.585       | 100.00          |

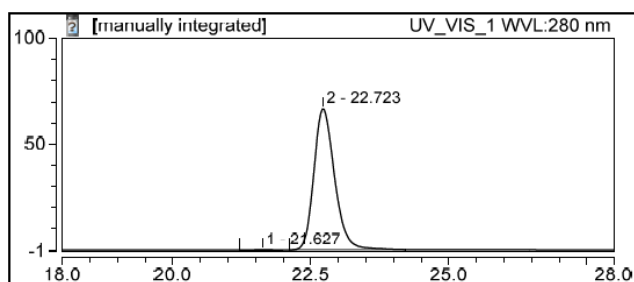

| Integration Results |                    |              |                 |
|---------------------|--------------------|--------------|-----------------|
| No.                 | Retention Time min | Area mAU*min | Relative Area % |
| 1                   | 21.627             | 0.028        | 0.10            |
| 2                   | 22.723             | 28.950       | 99.90           |
| Total:              |                    | 28.978       | 100.00          |

**(R)-3-benzyl-3-methyl-2,3-dihydrobenzofuran (3u)**



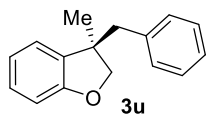

The compound was prepared according to the General Procedure from the reaction of **1a** (54.8 mg, 0.2 mmol) and **2v** (40.8 mg, 0.2 mmol).

31.4 mg, 70% yield, 98% ee, colorless oil.

**Chiral HPLC:** CHIRALPAK IA, 25 °C, *i*PrOH-hexanes 0.2/99.8, 0.75 mL/min, 220 nm,  $t_R$ (major) = 19.1 min,  $t_R$ (minor) = 22.7 min.

$[\alpha]_D^{21} = +1$  ( $c = 1.0$ , CH<sub>2</sub>Cl<sub>2</sub>).

**<sup>1</sup>H NMR (400 MHz, CDCl<sub>3</sub>):**  $\delta$  7.25-7.20 (m, 3 H), 7.15-7.11 (m, 1 H), 7.00-6.98 (m, 2 H), 6.95-6.92 (m, 1 H), 6.88-6.84 (m, 1 H), 6.76 (d,  $J = 8.0$  Hz, 1 H), 4.50 (d,  $J = 8.8$  Hz, 1 H), 4.05 (d,  $J = 8.8$  Hz, 1 H), 2.91-2.83 (m, 2 H), 1.35 (s, 3 H).

**<sup>13</sup>C NMR (100 MHz, CDCl<sub>3</sub>):**  $\delta$  159.5, 137.5, 134.8, 130.3, 128.1, 127.9, 126.4, 123.3, 120.2, 109.7, 81.8, 46.6, 46.2, 24.5.

**IR (neat, cm<sup>-1</sup>):** 3432, 2086, 1637, 1479, 1418, 1261, 1122, 1042, 750, 702.

**HRMS (ESI):**  $[M+H]^+$  calcd for C<sub>16</sub>H<sub>17</sub>O 225.1274, found 225.1272.

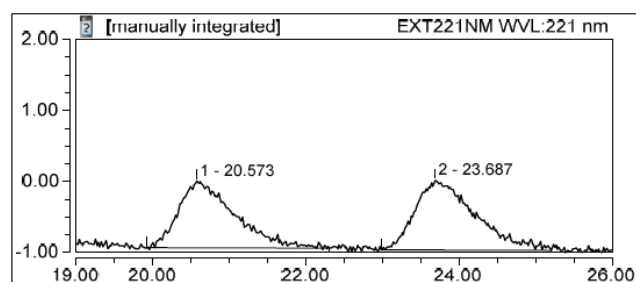

| Integration Results |                    |              |                 |
|---------------------|--------------------|--------------|-----------------|
| No.                 | Retention Time min | Area mAU*min | Relative Area % |
| 1                   | 20.573             | 0.791        | 47.03           |
| 2                   | 23.687             | 0.891        | 52.97           |
| Total:              |                    | 1.682        | 100.00          |

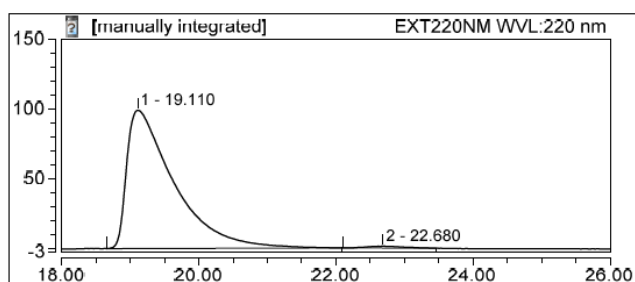

| Integration Results |                    |              |                 |
|---------------------|--------------------|--------------|-----------------|
| No.                 | Retention Time min | Area mAU*min | Relative Area % |
| 1                   | 19.110             | 79.310       | 98.91           |
| 2                   | 22.680             | 0.870        | 1.09            |
| Total:              |                    | 80.180       | 100.00          |

**(R)-4-((5-(*tert*-butyl)-3-methyl-2,3-dihydrobenzofuran-3-yl)methyl)-1-tosyl-1,2,3,6-tetrahydropyridine (**3v**)**

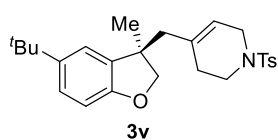

The compound was prepared according to the General Procedure from the reaction of **1b** (66.0 mg, 0.2 mmol) and **2k** (77.0 mg, 0.2 mmol).

65.9 mg, 75% yield, 97% ee, colorless oil.

**Chiral HPLC:** CHIRALPAK IA, 25 °C, *i*PrOH-hexanes 3/97, 1 mL/min, 279 nm,  $t_R$ (minor) = 32.7 min,  $t_R$ (major) = 37.8 min.

$[\alpha]_D^{24} = +14$  ( $c = 1.0$ , CH<sub>2</sub>Cl<sub>2</sub>).

**<sup>1</sup>H NMR (400 MHz, CDCl<sub>3</sub>):**  $\delta$  7.64 (d,  $J = 8.0$  Hz, 2 H), 7.31 (d,  $J = 8.0$  Hz, 2 H), 7.12 (dd,  $J = 2.0$ , 8.0 Hz, 1 H), 7.02 (d,  $J = 2.0$  Hz, 1 H), 6.66 (d,  $J = 8.4$  Hz, 1 H), 5.29 (s, 1 H), 4.33 (d,  $J = 8.4$  Hz, 1

H), 4.07 (d,  $J = 8.8$  Hz, 1 H), 3.60-3.46 (m, 2 H), 3.11-2.92 (m, 2 H), 2.42 (s, 3 H), 2.28 (s, 2 H), 1.91-1.79 (m, 2 H), 1.29 (s, 3 H), 1.27 (s, 9 H).

**$^{13}\text{C}$  NMR (100 MHz,  $\text{CDCl}_3$ ):**  $\delta$  157.0, 143.5, 143.4, 134.1, 133.6, 133.2, 129.6, 127.6, 124.9, 120.9, 119.7, 108.7, 82.2, 47.9, 45.5, 44.8, 42.9, 34.3, 31.7, 29.9, 25.7, 21.5.

**IR (neat,  $\text{cm}^{-1}$ ):** 2963, 2873, 1490, 1461, 1349, 1165, 1094, 950, 818, 736.

**HRMS (ESI):**  $[\text{M}+\text{H}]^+$  calcd for  $\text{C}_{26}\text{H}_{34}\text{NO}_3\text{S}$  440.2254, found 440.2253.

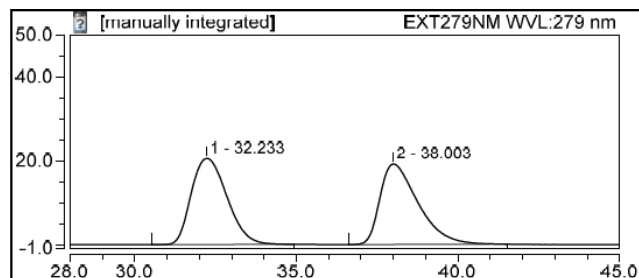

| Integration Results |                    |              |                 |
|---------------------|--------------------|--------------|-----------------|
| No.                 | Retention Time min | Area mAU*min | Relative Area % |
| 1                   | 32.233             | 26.305       | 50.04           |
| 2                   | 38.003             | 26.261       | 49.96           |
| Total:              |                    | 52.567       | 100.00          |

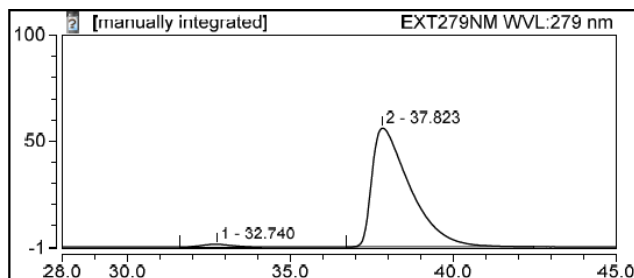

| Integration Results |                    |              |                 |
|---------------------|--------------------|--------------|-----------------|
| No.                 | Retention Time min | Area mAU*min | Relative Area % |
| 1                   | 32.740             | 1.229        | 1.59            |
| 2                   | 37.823             | 76.299       | 98.41           |
| Total:              |                    | 77.528       | 100.00          |

**(*R*)-4-((5-isopropyl-3,6-dimethyl-2,3-dihydrobenzofuran-3-yl)methyl)-1-tosyl-1,2,3,6-tetrahydropyridine (3w)**

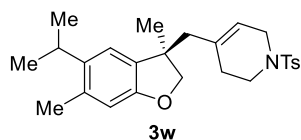

The compound (a colorless oil, 72.0 mg, 82% yield, 97% ee) was prepared according to the General Procedure from the reaction of **1c** (66.0 mg, 0.2 mmol) and **2k** (77.0 mg, 0.2 mmol). The gram scale reaction was conducted with **1c** (1.32 g, 4.0 mmol) and **2k** (1.54 g, 4.0 mmol) to afford **3w** with 72% yield (1.27 g) and 97% ee.

**Chiral HPLC:** CHIRALPAK IA, 25 °C, *i*PrOH-hexanes 3/97, 1 mL/min, 287 nm,  $t_R$ (minor) = 30.2 min,  $t_R$ (major) = 33.2 min.

$[\alpha]_D^{24} = +9$  ( $c = 1.0$ ,  $\text{CH}_2\text{Cl}_2$ ).

**$^1\text{H}$  NMR (400 MHz,  $\text{CDCl}_3$ ):**  $\delta$  7.64 (d,  $J = 8.4$  Hz, 2 H), 7.31 (d,  $J = 8.0$  Hz, 2 H), 6.87 (s, 1 H), 6.53 (s, 1 H), 5.29 (s, 1 H), 4.30 (d,  $J = 8.8$  Hz, 1 H), 4.05 (d,  $J = 8.8$  Hz, 1 H), 3.61-3.46 (m, 2 H), 3.13-3.03 (m, 3 H), 2.42 (s, 3 H), 2.27 (s, 5 H), 1.93-1.82 (m, 2 H), 1.27 (s, 3 H), 1.18-1.14 (m, 6 H).

**$^{13}\text{C}$  NMR (100 MHz,  $\text{CDCl}_3$ ):**  $\delta$  157.0, 143.4, 138.9, 135.0, 133.7, 133.2, 132.2, 129.6, 127.6, 120.8, 118.9, 111.0, 82.1, 47.9, 45.4, 44.8, 42.9, 29.9, 28.8, 25.9, 23.7, 23.4, 21.4, 19.6.

**IR (neat,  $\text{cm}^{-1}$ ):** 2960, 2926, 1489, 1459, 1349, 1165, 1094, 948, 818, 738.

**HRMS (ESI):**  $[\text{M}+\text{H}]^+$  calcd for  $\text{C}_{26}\text{H}_{34}\text{NO}_3\text{S}$  440.2254, found 440.2252.

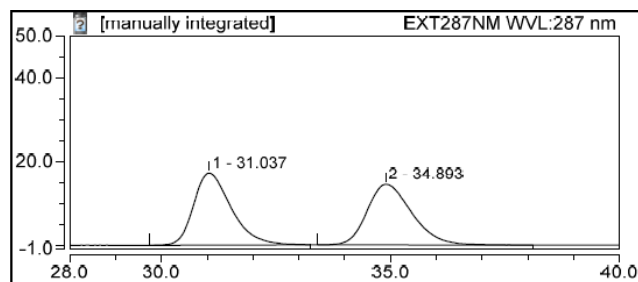

| Integration Results |                    |              |                 |
|---------------------|--------------------|--------------|-----------------|
| No.                 | Retention Time min | Area mAU*min | Relative Area % |
| 1                   | 31.037             | 16.436       | 50.02           |
| 2                   | 34.893             | 16.420       | 49.98           |
| Total:              |                    | 32.857       | 100.00          |

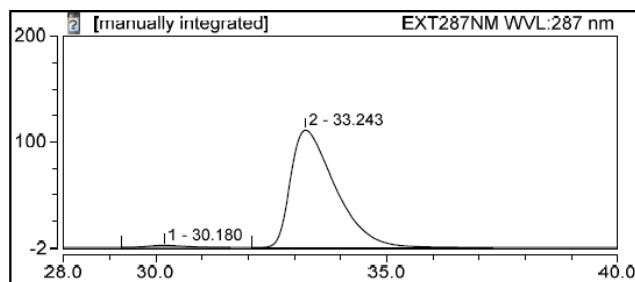

| Integration Results |                    |              |                 |
|---------------------|--------------------|--------------|-----------------|
| No.                 | Retention Time min | Area mAU*min | Relative Area % |
| 1                   | 30.180             | 1.732        | 1.37            |
| 2                   | 33.243             | 124.493      | 98.63           |
| Total:              |                    | 126.225      | 100.00          |

**(R)-4-((3,5-dimethyl-2,3-dihydrobenzofuran-3-yl)methyl)-1-tosyl-1,2,3,6-tetrahydropyridine**

**(3x)**

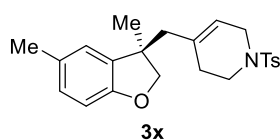

The compound was prepared according to the General Procedure from the reaction of **1d** (57.6 mg, 0.2 mmol) and **2k** (77.0 mg, 0.2 mmol).

47.6 mg, 63% yield, 97% ee, colorless oil.

**Chiral HPLC:** CHIRALPAK IA, 25 °C, *i*PrOH-hexanes 10/90, 1 mL/min, 281 nm,  $t_R$ (minor) = 17.3 min,  $t_R$ (major) = 27.3 min.

$[\alpha]_D^{24} = +12$  (c = 0.68, CH<sub>2</sub>Cl<sub>2</sub>).

**<sup>1</sup>H NMR (400 MHz, CDCl<sub>3</sub>):** δ 7.64 (d, *J* = 8.4 Hz, 2 H), 7.31 (d, *J* = 8.0 Hz, 2 H), 6.89 (d, *J* = 8.0 Hz, 1 H), 6.83 (s, 1 H), 6.62 (d, *J* = 8.0 Hz, 1 H), 5.30 (s, 1 H), 4.32 (d, *J* = 8.4 Hz, 1 H), 4.05 (d, *J* = 8.8 Hz, 1 H), 3.61-3.49 (m, 2 H), 3.11-2.95 (m, 2 H), 2.42 (s, 3 H), 2.31-2.23 (m, 2 H), 2.26 (s, 3 H), 1.94-1.80 (m, 2 H), 1.26 (s, 3 H).

**<sup>13</sup>C NMR (100 MHz, CDCl<sub>3</sub>):** δ 157.1, 143.5, 134.9, 133.6, 133.4, 129.7, 129.6, 128.6, 127.6, 123.3, 120.9, 109.2, 81.8, 47.8, 45.4, 44.8, 42.8, 30.0, 26.0, 21.5, 20.8.

**IR (neat, cm<sup>-1</sup>):** 2967, 2924, 1490, 1459, 1344, 1165, 1094, 982, 814, 688.

**HRMS (ESI):** [M+H]<sup>+</sup> calcd for C<sub>23</sub>H<sub>28</sub>NO<sub>3</sub>S 398.1784, found 229.1785.

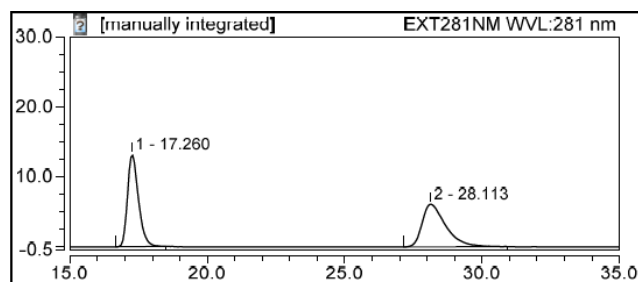

| Integration Results |                    |              |                 |
|---------------------|--------------------|--------------|-----------------|
| No.                 | Retention Time min | Area mAU*min | Relative Area % |
| 1                   | 17.260             | 6.092        | 50.10           |
| 2                   | 28.113             | 6.067        | 49.90           |
| Total:              |                    | 12.159       | 100.00          |

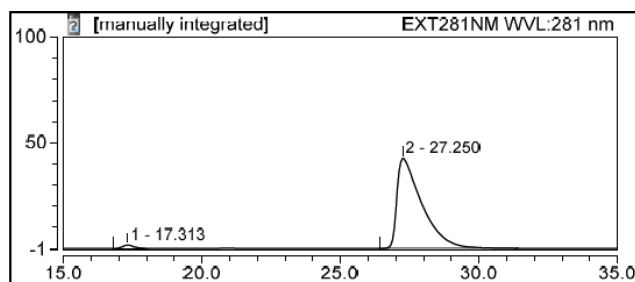

| Integration Results |                    |              |                 |
|---------------------|--------------------|--------------|-----------------|
| No.                 | Retention Time min | Area mAU*min | Relative Area % |
| 1                   | 17.313             | 0.678        | 1.51            |
| 2                   | 27.250             | 44.336       | 98.49           |
| Total:              |                    | 45.014       | 100.00          |

**(R)-3-(cyclohex-1-en-1-ylmethyl)-5-fluoro-3-methyl-2,3-dihydrobenzofuran (3y)**

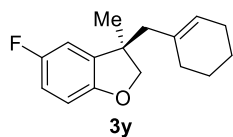

The compound was prepared according to the General Procedure from the reaction of **1e** (105.1 mg, 0.36 mmol) and **2a** (46.0 mg, 0.2 mmol). NiI<sub>2</sub> (9.5 mg, 0.030 mmol) and **L1** (11.4 mg, 0.042 mmol) were used.

16.7 mg, 38% yield, 99% ee, colorless oil.

**Chiral HPLC:** CHIRALPAK IA, 25 °C, *i*PrOH-hexanes 0.2/99.8, 0.75 mL/min, 289 nm, *t*<sub>R</sub>(major) = 13.2 min, *t*<sub>R</sub>(minor) = 21.6 min.

[α]<sub>D</sub><sup>21</sup> = -5 (c = 1.0, CH<sub>2</sub>Cl<sub>2</sub>).

**<sup>1</sup>H NMR (400 MHz, CDCl<sub>3</sub>):** δ 6.81-6.76 (m, 2 H), 6.68-6.65 (m, 1 H), 5.40 (s, 1 H), 4.48 (d, *J* = 8.8 Hz, 1 H), 4.16 (d, *J* = 8.8 Hz, 1 H), 2.31-2.22 (m, 2 H), 1.99 (s, 2 H), 1.78-1.62 (m, 2 H), 1.56-1.45 (m, 4 H), 1.30 (s, 3 H).

**<sup>13</sup>C NMR (100 MHz, CDCl<sub>3</sub>):** δ 157.5 (d, *J*<sub>C-F</sub> = 236.0 Hz), 155.1, 137.3 (d, *J*<sub>C-F</sub> = 8.0 Hz), 134.2, 126.3, 114.0 (d, *J*<sub>C-F</sub> = 24.0 Hz), 110.2 (d, *J*<sub>C-F</sub> = 24.0 Hz), 109.6 (d, *J*<sub>C-F</sub> = 8.0 Hz), 82.9, 48.8, 46.0, 30.2, 26.1, 25.4, 23.0, 22.1.

**<sup>19</sup>F NMR (376 MHz, CDCl<sub>3</sub>):** δ -124.40.

**IR (neat, cm<sup>-1</sup>):** 2961, 2850, 1591, 1486, 1261, 1175, 1092, 1039, 807, 751.

**HRMS (ESI):** [M+H]<sup>+</sup> calcd for C<sub>16</sub>H<sub>20</sub>FO 247.1493, found 247.1509.

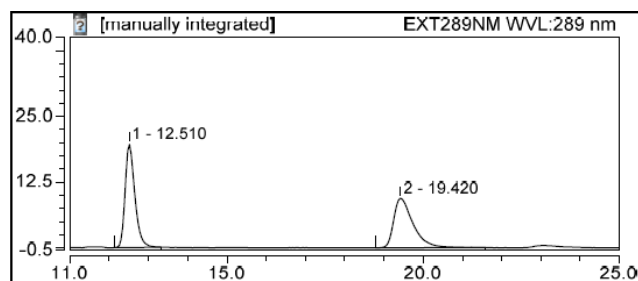

| Integration Results |                       |                 |                    |
|---------------------|-----------------------|-----------------|--------------------|
| No.                 | Retention Time<br>min | Area<br>mAU*min | Relative Area<br>% |
| 1                   | 12.510                | 5.589           | 51.06              |
| 2                   | 19.420                | 5.358           | 48.94              |
| Total:              |                       | 10.947          | 100.00             |

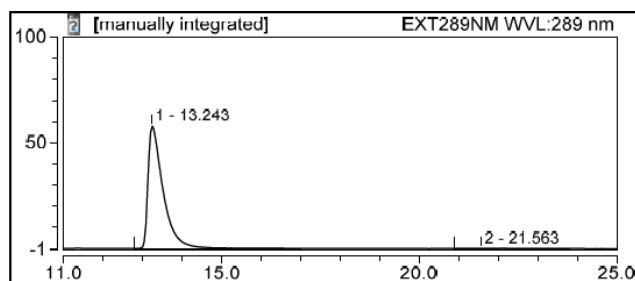

| Integration Results |                       |                 |                    |
|---------------------|-----------------------|-----------------|--------------------|
| No.                 | Retention Time<br>min | Area<br>mAU*min | Relative Area<br>% |
| 1                   | 13.243                | 25.627          | 99.56              |
| 2                   | 21.563                | 0.113           | 0.44               |
| Total:              |                       | 25.740          | 100.00             |

**(R)-4-((3-methyl-5-phenyl-2,3-dihydrobenzofuran-3-yl)methyl)-1-tosyl-1,2,3,6-tetrahydropyridine (3z)**

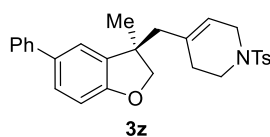

The compound was prepared according to the General Procedure from the reaction of **1f** (70.0 mg, 0.2 mmol) and **2k** (77.0 mg, 0.2 mmol).

48.7 mg, 55% yield, 95% ee, white solid, mp: 60-62 °C.

**Chiral HPLC:** CHIRALCEL OD-H, 25 °C, *i*PrOH-hexanes 5/95, 1 mL/min, 280 nm, *t*<sub>R</sub>(major) =

45.9 min,  $t_R(\text{minor}) = 54.3$  min.

$[\alpha]_D^{24} = +75$  ( $c = 1.0$ ,  $\text{CH}_2\text{Cl}_2$ ).

**$^1\text{H}$  NMR (400 MHz,  $\text{CDCl}_3$ ):**  $\delta$  7.64 (d,  $J = 8.0$  Hz, 2 H), 7.52-7.50 (m, 2 H), 7.40 (t,  $J = 8.0$  Hz, 2 H), 7.35 (dd,  $J = 2.0, 8.0$  Hz, 1 H), 7.31-7.28 (m, 3 H), 7.25 (d,  $J = 2.0$  Hz, 1 H), 6.80 (d,  $J = 8.0$  Hz, 1 H), 5.33 (s, 1 H), 4.41 (d,  $J = 8.8$  Hz, 1 H), 4.14 (d,  $J = 8.8$  Hz, 1 H), 3.62-3.47 (m, 2 H), 3.14-2.93 (m, 2 H), 2.42 (s, 3 H), 2.37-2.29 (m, 2 H), 1.97-1.85 (m, 2 H), 1.33 (s, 3 H).

**$^{13}\text{C}$  NMR (100 MHz,  $\text{CDCl}_3$ ):**  $\delta$  158.9, 143.5, 141.2, 135.5, 134.0, 133.5, 133.2, 129.6, 128.7, 127.6, 127.4, 126.7, 126.6, 121.6, 121.1, 109.8, 82.2, 47.9, 45.4, 44.8, 42.8, 30.0, 26.1, 21.5.

**IR (neat,  $\text{cm}^{-1}$ ):** 2963, 2853, 1601, 1482, 1344, 1165, 1096, 958, 818, 738.

**HRMS (ESI):**  $[\text{M}+\text{H}]^+$  calcd for  $\text{C}_{28}\text{H}_{30}\text{NO}_3\text{S}$  460.1941, found 460.1941.

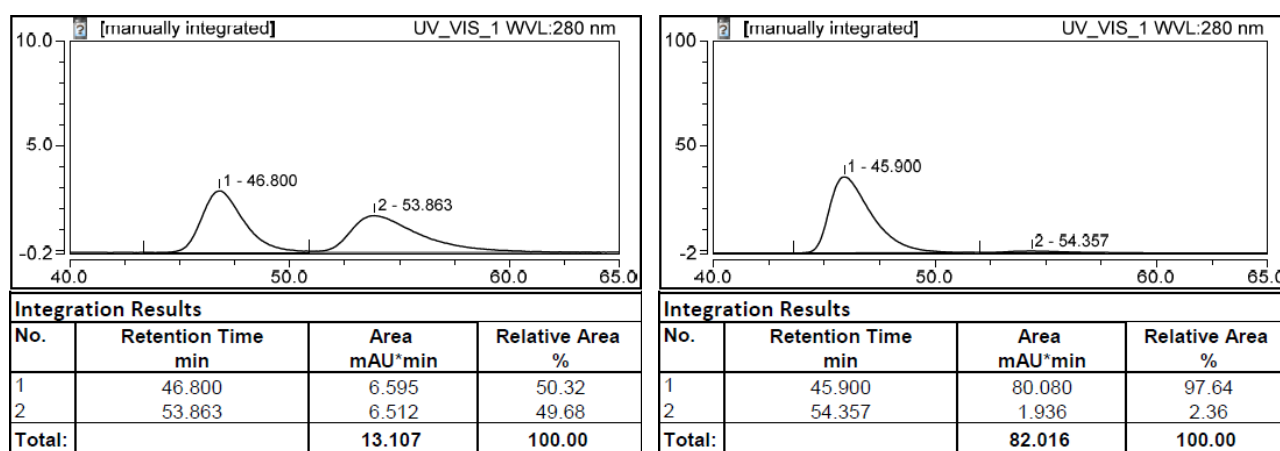

**(R)-3-(cyclohex-1-en-1-ylmethyl)-3,6-dimethyl-2,3-dihydrobenzofuran (3ab)**

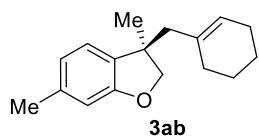

The compound was prepared according to the General Procedure from the reaction of **1h** (57.6 mg, 0.2 mmol) and **2a** (46.0 mg, 0.2 mmol).

29.0 mg, 60% yield, 98% ee, colorless oil.

**Chiral HPLC:** CHIRALPAK IA, 25 °C,  $i\text{PrOH}$ -hexanes 0.2/99.8, 0.75 mL/min, 284 nm,  $t_R(\text{major}) = 11.4$  min,  $t_R(\text{minor}) = 13.5$  min.

$[\alpha]_D^{21} = -8$  ( $c = 1.0$ ,  $\text{CH}_2\text{Cl}_2$ )

**$^1\text{H}$  NMR (400 MHz,  $\text{CDCl}_3$ ):**  $\delta$  6.95 (d,  $J = 7.6$  Hz, 1 H), 6.83 (dd,  $J = 0.4$  Hz,  $J = 7.2$  Hz, 1 H), 6.59 (s, 1 H), 5.41 (s, 1 H), 4.45 (d,  $J = 8.4$  Hz, 1 H), 4.13 (d,  $J = 8.4$  Hz, 1 H), 2.30 (s, 3 H), 2.27 (d,  $J = 6.0$  Hz, 2 H), 1.99 (s, 2 H), 1.77-1.64 (m, 2 H), 1.58-1.45 (m, 4 H), 1.28 (s, 3 H).

**$^{13}\text{C}$  NMR (100 MHz,  $\text{CDCl}_3$ ):**  $\delta$  159.5, 138.0, 134.7, 133.0, 125.8, 122.5, 121.0, 110.2, 82.6, 49.0, 45.2, 30.2, 26.3, 25.4, 23.0, 22.2, 21.5.

**IR (neat,  $\text{cm}^{-1}$ ):** 2923, 2836, 1592, 1495, 1425, 1251, 1122, 1007, 980, 751.

**HRMS (ESI):**  $[M+H]^+$  calcd for  $C_{17}H_{23}O$  243.1743, found 243.1749.

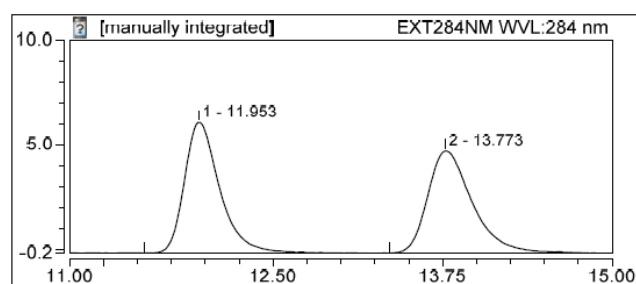

| Integration Results |                    |              |                 |
|---------------------|--------------------|--------------|-----------------|
| No.                 | Retention Time min | Area mAU*min | Relative Area % |
| 1                   | 11.953             | 1.905        | 50.16           |
| 2                   | 13.773             | 1.893        | 49.84           |
| Total:              |                    | 3.798        | 100.00          |

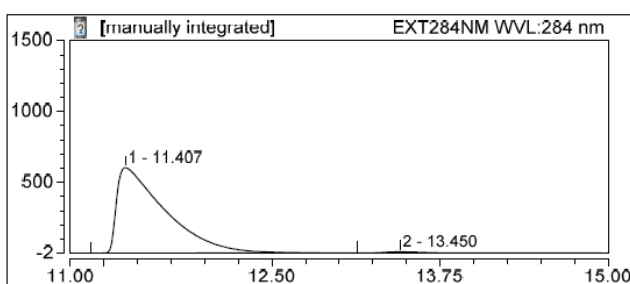

| Integration Results |                    |              |                 |
|---------------------|--------------------|--------------|-----------------|
| No.                 | Retention Time min | Area mAU*min | Relative Area % |
| 1                   | 11.407             | 251.311      | 98.93           |
| 2                   | 13.450             | 2.719        | 1.07            |
| Total:              |                    | 254.030      | 100.00          |

**(R)-3-(cyclohex-1-en-1-ylmethyl)-3,5,7-trimethyl-2,3-dihydrobenzofuran (3ac)**

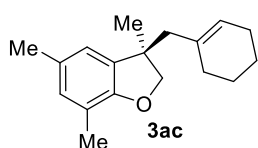

The compound was prepared according to the General Procedure from the reaction of **1i** (60.4 mg, 0.2 mmol) and **2a** (46.0 mg, 0.2 mmol).

33.3 mg, 65% yield, 90% ee, colorless oil.

**Chiral HPLC:** CHIRALCEL OD-H, 25 °C, *i*-PrOH-hexanes 0.2/99.8, 0.75 mL/min, 290 nm,  $t_R$ (major) = 10.9 min,  $t_R$ (minor) = 12.6 min.

$[\alpha]_D^{21} = -2$  ( $c = 1.0$ ,  $CH_2Cl_2$ ).

**$^1H$  NMR (400 MHz,  $CDCl_3$ ):**  $\delta$  6.75 (d,  $J = 0.8$  Hz, 1 H), 6.72 (d,  $J = 0.4$  Hz, 1 H), 5.42 (s, 1 H), 4.44 (d,  $J = 8.4$  Hz, 1 H), 4.12 (d,  $J = 8.4$  Hz, 1 H), 2.30-2.22 (m, 5 H), 2.17 (s, 3 H), 2.00 (s, 2 H), 1.78-1.65 (m, 2 H), 1.57-1.45 (m, 4 H), 1.27 (s, 3 H).

**$^{13}C$  NMR (100 MHz,  $CDCl_3$ ):**  $\delta$  155.4, 135.3, 134.8, 129.7, 129.4, 125.7, 120.8, 119.0, 82.3, 48.9, 45.8, 30.2, 25.9, 25.5, 23.1, 22.2, 20.8, 15.0.

**IR (neat,  $cm^{-1}$ ):** 3429, 2923, 2836, 1638, 1482, 1200, 1123, 1003, 854, 749.

**HRMS (ESI):**  $[M+H]^+$  calcd for  $C_{18}H_{25}O$  257.1900, found 257.1903.

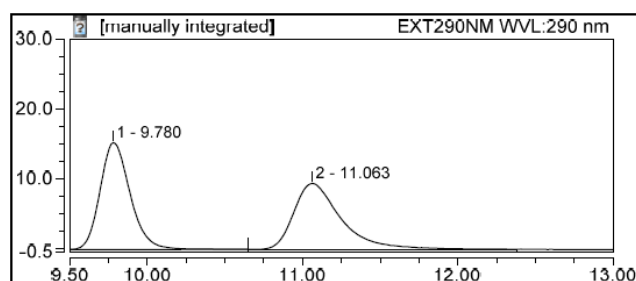

| Integration Results |                    |              |                 |
|---------------------|--------------------|--------------|-----------------|
| No.                 | Retention Time min | Area mAU*min | Relative Area % |
| 1                   | 9.780              | 3.450        | 50.82           |
| 2                   | 11.063             | 3.338        | 49.18           |
| Total:              |                    | 6.789        | 100.00          |

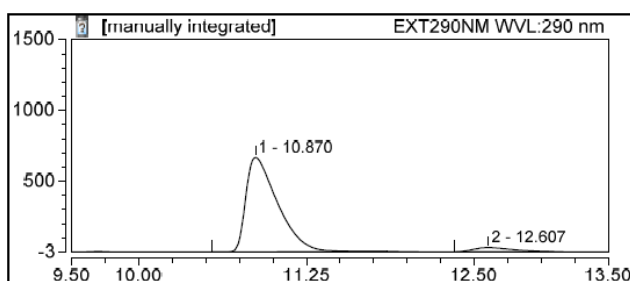

| Integration Results |                    |              |                 |
|---------------------|--------------------|--------------|-----------------|
| No.                 | Retention Time min | Area mAU*min | Relative Area % |
| 1                   | 10.870             | 181.991      | 94.98           |
| 2                   | 12.607             | 9.617        | 5.02            |
| Total:              |                    | 191.607      | 100.00          |

**(R)-8-((6-chloro-3-methyl-2,3-dihydrobenzofuran-3-yl)methyl)-1,4-dioxaspiro[4.5]dec-7-ene (3ae)**

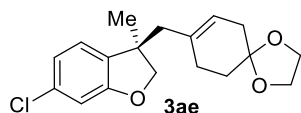

The compound was prepared according to the General Procedure from the reaction of **1k** (61.6 mg, 0.2 mmol) and **2h** (57.6 mg, 0.2 mmol) in DMF.

41.0 mg, 64% yield, 98% ee, colorless oil.

**Chiral HPLC:** CHIRALCEL OJ-H, 25 °C, *i*PrOH-hexanes 0.2/99.8, 0.75 mL/min, 260 nm,  $t_R$ (minor) = 10.4 min,  $t_R$ (major) = 12.5 min.

$[\alpha]_D^{21} = -8$  ( $c = 0.5$ , CH<sub>2</sub>Cl<sub>2</sub>).

**<sup>1</sup>H NMR (400 MHz, CDCl<sub>3</sub>):**  $\delta$  6.98 (d,  $J = 8.0$  Hz, 1 H), 6.83 (dd,  $J = 1.6$  Hz,  $J = 8.0$  Hz, 1 H), 6.76 (d,  $J = 1.6$  Hz, 1 H), 5.30 (s, 1 H), 4.47 (d,  $J = 8.4$  Hz, 1 H), 4.18 (d,  $J = 8.4$  Hz, 1 H), 3.96 (d,  $J = 2.4$  Hz, 4 H), 2.31-2.26 (m, 4 H), 1.96 (d,  $J = 5.6$  Hz, 2 H), 1.66 (t,  $J = 6.4$  Hz, 2 H), 1.32 (s, 3 H).

**<sup>13</sup>C NMR (100 MHz, CDCl<sub>3</sub>):**  $\delta$  160.2, 134.3, 134.0, 133.3, 123.6, 123.4, 120.4, 110.4, 107.6, 83.2, 64.4, 47.6, 45.3, 35.8, 31.2, 29.2, 26.0.

**IR (neat, cm<sup>-1</sup>):** 2917, 1593, 1480, 1417, 1316, 1260, 1118, 1042, 875, 804.

**HRMS (ESI):**  $[M+H]^+$  calcd for C<sub>18</sub>H<sub>22</sub>ClO<sub>3</sub> 321.1252, found 321.1259.

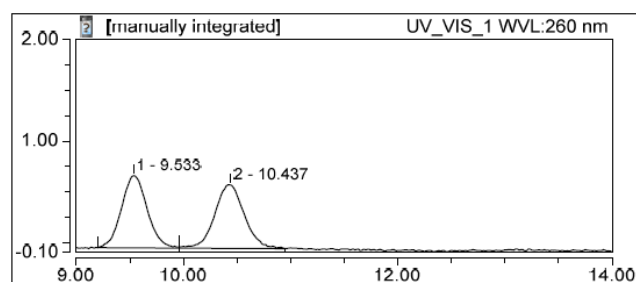

| Integration Results |                    |              |                 |
|---------------------|--------------------|--------------|-----------------|
| No.                 | Retention Time min | Area mAU*min | Relative Area % |
| 1                   | 9.533              | 0.199        | 49.80           |
| 2                   | 10.437             | 0.200        | 50.20           |
| Total:              |                    | 0.399        | 100.00          |

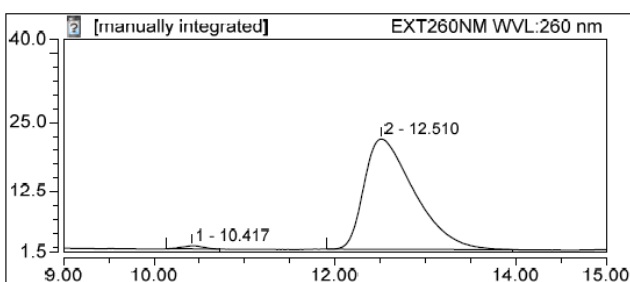

| Integration Results |                    |              |                 |
|---------------------|--------------------|--------------|-----------------|
| No.                 | Retention Time min | Area mAU*min | Relative Area % |
| 1                   | 10.417             | 0.153        | 1.17            |
| 2                   | 12.510             | 12.859       | 98.83           |
| Total:              |                    | 13.011       | 100.00          |

**(S)-3-(tert-butyl)-3-(cyclohex-1-en-1-ylmethyl)-2,3-dihydrobenzofuran (3af)**

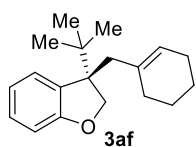

The compound was prepared according to the General Procedure from the reaction of **1l** (63.2 mg, 0.2 mmol) and **2a** (46.0 mg, 0.2 mmol).

33.0 mg, 65% yield, 98% ee, colorless oil.

**Chiral HPLC:** CHIRALCEL OD-H, 25 °C, *i*PrOH-hexanes 0.2/99.8, 0.75 mL/min, 295 nm,  $t_R$ (major) = 7.7 min,  $t_R$ (minor) = 10.9 min.

$[\alpha]_D^{21} = +68$  ( $c = 0.5$ , CH<sub>2</sub>Cl<sub>2</sub>).

**<sup>1</sup>H NMR (400 MHz, CDCl<sub>3</sub>):**  $\delta$  7.19-7.17 (m, 1 H), 7.10 (dt,  $J = 1.2$ , 7.6 Hz, 1 H), 6.80 (m, 1 H),

6.70 (d,  $J = 8.0$  Hz, 1 H), 5.31 (s, 1 H), 4.49-4.41 (m, 2 H), 2.56-2.53 (m, 1 H), 2.36-2.33 (m, 1 H), 1.92 (s, 2 H), 1.44-1.34 (m, 6 H), 0.93 (s, 9 H).

**$^{13}\text{C}$  NMR (100 MHz,  $\text{CDCl}_3$ ):**  $\delta$  160.6, 135.9, 131.9, 127.9, 126.4, 125.6, 119.2, 109.0, 76.1, 54.4, 42.3, 37.2, 30.0, 25.6, 25.5, 23.0, 22.1.

**IR (neat,  $\text{cm}^{-1}$ ):** 2961, 2935, 1687, 1655, 1459, 1217, 1112, 1084, 835, 751.

**HRMS (ESI):**  $[\text{M}+\text{H}]^+$  calcd for  $\text{C}_{19}\text{H}_{27}\text{O}$  271.2056, found 271.2058.

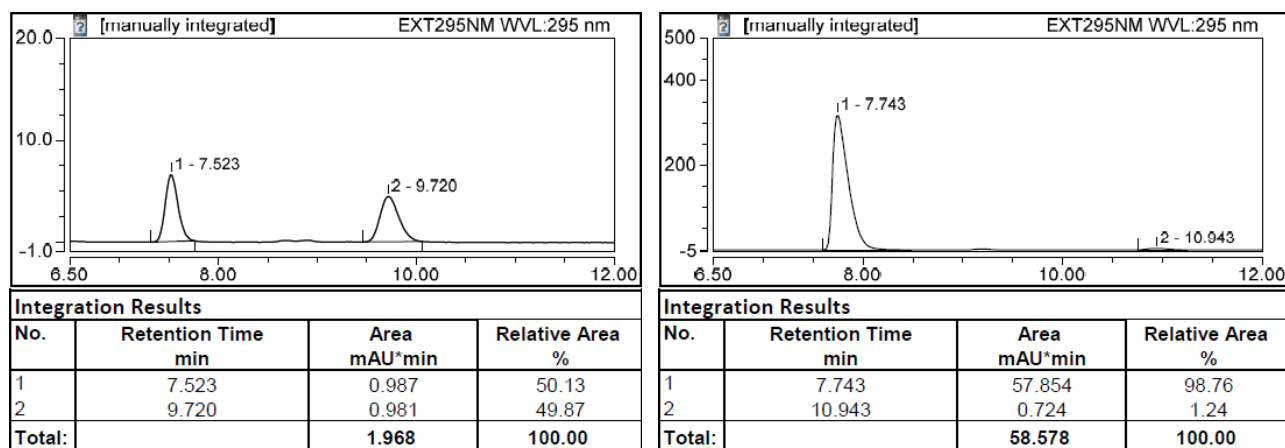

**(R)-3-(cyclohex-1-en-1-ylmethyl)-3-octyl-2,3-dihydrobenzofuran (3ag)**

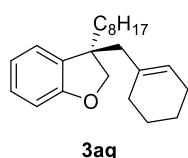

The compound was prepared according to the General Procedure from the reaction of **1m** (74.4 mg, 0.2 mmol) and **2a** (46.0 mg, 0.2 mmol).  
42.4 mg, 68% yield, 95% ee, colorless.

**Chiral HPLC:** CHIRALPAK IB, 25 °C,  $i\text{PrOH}$ -hexanes 0.2/99.8, 0.5 mL/min, 280 nm,  $t_R(\text{major}) = 9.0$  min,  $t_R(\text{minor}) = 10.1$  min.

$[\alpha]_D^{22} = -2$  ( $c = 0.5$ ,  $\text{CH}_2\text{Cl}_2$ ).

**$^1\text{H}$  NMR (400 MHz,  $\text{CDCl}_3$ ):**  $\delta$  7.10 (dt,  $J = 1.2, 7.6$  Hz, 1 H), 7.04 (dd,  $J = 1.2, 7.6$  Hz, 1 H), 6.84 (dt,  $J = 0.8, 7.6$  Hz, 1 H), 6.74 (d,  $J = 7.8$  Hz, 1 H), 5.38 (s, 1 H), 4.41 (d,  $J = 8.8$  Hz, 1 H), 4.26 (d,  $J = 8.4$  Hz, 1 H), 2.33 (s, 2 H), 1.98 (s, 2 H), 1.70-1.42 (m, 8 H), 1.32-1.00 (m, 12 H), 0.86 (t,  $J = 6.8$  Hz, 3 H).

**$^{13}\text{C}$  NMR (100 MHz,  $\text{CDCl}_3$ ):**  $\delta$  159.8, 134.6, 134.0, 127.9, 125.9, 123.7, 120.0, 109.3, 80.5, 48.9, 47.6, 39.5, 31.8, 30.2, 30.1, 29.4, 29.3, 25.5, 24.2, 23.0, 22.6, 22.1, 14.1.

**IR (neat,  $\text{cm}^{-1}$ ):** 2924, 2857, 1597, 1482, 1459, 1230, 1019, 975, 831, 745.

**HRMS (ESI):**  $[\text{M}+\text{H}]^+$  calcd for  $\text{C}_{23}\text{H}_{35}\text{O}$  327.2682, found 327.2682.



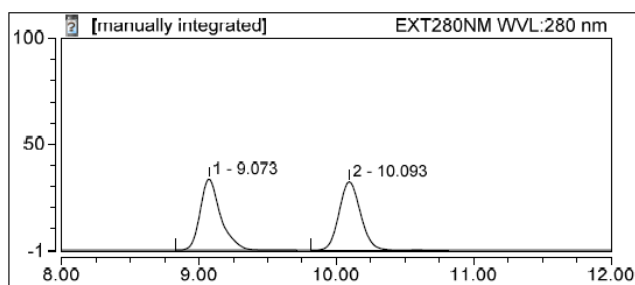

| Integration Results |                    |              |                 |
|---------------------|--------------------|--------------|-----------------|
| No.                 | Retention Time min | Area mAU*min | Relative Area % |
| 1                   | 9.073              | 5.795        | 49.95           |
| 2                   | 10.093             | 5.806        | 50.05           |
| Total:              |                    | 11.601       | 100.00          |

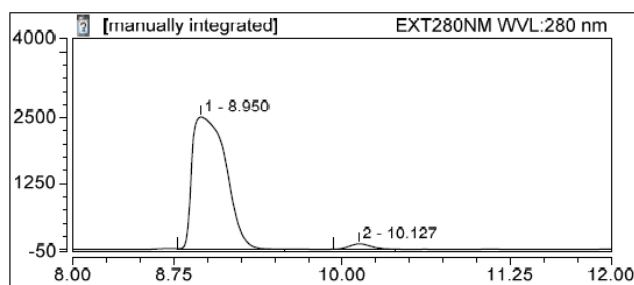

| Integration Results |                    |              |                 |
|---------------------|--------------------|--------------|-----------------|
| No.                 | Retention Time min | Area mAU*min | Relative Area % |
| 1                   | 8.950              | 725.404      | 97.48           |
| 2                   | 10.127             | 18.751       | 2.52            |
| Total:              |                    | 744.155      | 100.00          |

### (*R,E*)-3-(cyclooct-1-en-1-ylmethyl)-3-pentyl-2,3-dihydrobenzofuran (3ah)

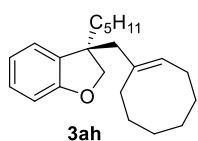

The compound was prepared according to the General Procedure from the reaction of **1n** (66.0 mg, 0.2 mmol) and **2e** (51.6 mg, 0.2 mmol).

26.8 mg, 46% yield, 93% ee, colorless oil.

**Chiral HPLC:** CHIRALPAK IB, 25 °C, *i*PrOH-hexanes 0.2/99.8, 0.75 mL/min, 280 nm,  $t_R$ (major) = 7.1 min,  $t_R$ (minor) = 7.5 min.

$[\alpha]_D^{22} = +10$  ( $c = 0.5$ ,  $\text{CH}_2\text{Cl}_2$ ).

**$^1\text{H}$  NMR (400 MHz,  $\text{CDCl}_3$ ):**  $\delta$  7.12-7.08 (m, 1 H), 7.04 (d,  $J = 7.6$  Hz, 1 H), 6.84 (t,  $J = 7.2$  Hz, 1 H), 6.75 (d,  $J = 8.0$  Hz, 1 H), 5.33 (t,  $J = 8.0$  Hz, 1 H), 4.45 (d,  $J = 8.8$  Hz, 1 H), 4.28 (d,  $J = 8.8$  Hz, 1 H), 2.42-2.31 (m, 2 H), 2.07-1.81 (m, 4 H), 1.69-1.57 (m, 2 H), 1.45-0.88 (m, 14 H), 0.83 (t,  $J = 6.8$  Hz, 3 H).

**$^{13}\text{C}$  NMR (100 MHz,  $\text{CDCl}_3$ ):**  $\delta$  159.8, 137.0, 134.0, 129.0, 127.8, 123.6, 120.0, 109.3, 80.3, 49.1, 45.4, 39.3, 32.4, 30.0, 29.4, 28.2, 26.70, 26.68, 26.0, 23.9, 22.5, 14.0.

**IR (neat,  $\text{cm}^{-1}$ ):** 2963, 2851, 1595, 1459, 1260, 1122, 1093, 978, 803, 748.

**HRMS (ESI):**  $[\text{M}+\text{H}]^+$  calcd for  $\text{C}_{22}\text{H}_{33}\text{O}$  313.2526, found 313.2527..

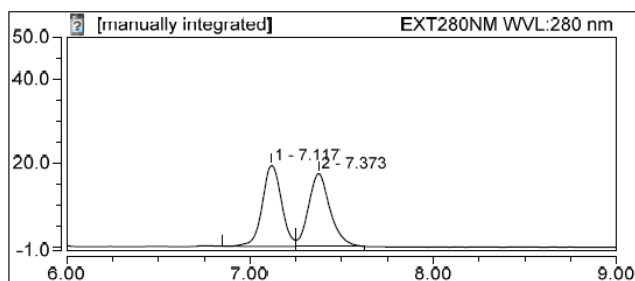

| Integration Results |                    |              |                 |
|---------------------|--------------------|--------------|-----------------|
| No.                 | Retention Time min | Area mAU*min | Relative Area % |
| 1                   | 7.117              | 2.355        | 50.00           |
| 2                   | 7.373              | 2.356        | 50.00           |
| Total:              |                    | 4.711        | 100.00          |

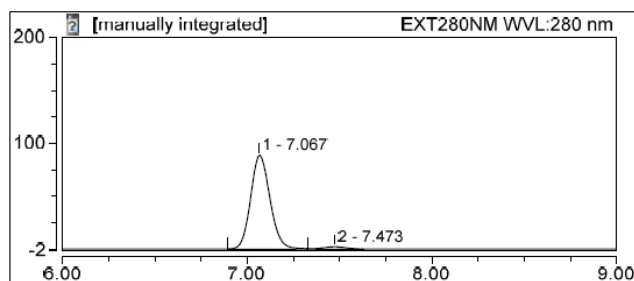

| Integration Results |                    |              |                 |
|---------------------|--------------------|--------------|-----------------|
| No.                 | Retention Time min | Area mAU*min | Relative Area % |
| 1                   | 7.067              | 10.870       | 96.69           |
| 2                   | 7.473              | 0.372        | 3.31            |
| Total:              |                    | 11.242       | 100.00          |

**(R)-4-((3-((but-3-en-1-yloxy)methyl)-2,3-dihydrobenzofuran-3-yl)methyl)-1-tosyl-1,2,3,6-tetrahydropyridine (3ai)**

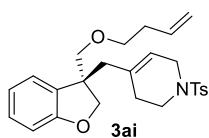

The compound was prepared according to the General Procedure from the reaction of **1o** (68.8 mg, 0.2 mmol) and **2k** (77.0 mg, 0.2 mmol) in DMF at 60 °C. 37.2 mg, 43% yield, 95% ee, colorless oil.

**Chiral HPLC:** CHIRALPAK IA, 25 °C, *i*PrOH-hexanes 10/90, 1 mL/min, 285 nm,  $t_R$ (minor) = 20.7 min,  $t_R$ (major) = 24.2 min.

$[\alpha]_D^{22} = -1$  ( $c = 1.0$ , CH<sub>2</sub>Cl<sub>2</sub>).

**<sup>1</sup>H NMR (400 MHz, CDCl<sub>3</sub>):**  $\delta$  7.63 (d,  $J = 8.0$  Hz, 2 H), 7.31 (d,  $J = 8.0$  Hz, 2 H), 7.15-7.07 (m, 2 H), 6.82 (dt,  $J = 1.2, 7.6$  Hz, 1 H), 6.74 (d,  $J = 8.0$  Hz, 1 H), 5.82-5.75 (m, 1 H), 5.31 (s, 1 H), 5.09-5.01 (m, 2 H), 4.28 (s, 2 H), 3.60-3.36 (m, 6 H), 3.10-2.89 (m, 2 H), 2.52-2.27 (m, 4 H), 2.42, (s, 3 H), 1.87-1.81 (m, 2 H).

**<sup>13</sup>C NMR (100 MHz, CDCl<sub>3</sub>):**  $\delta$  159.8, 143.5, 135.1, 133.3, 132.9, 131.1, 129.6, 128.8, 127.6, 124.2, 121.1, 120.1, 116.4, 109.7, 78.3, 75.7, 70.6, 49.9, 44.8, 42.8, 42.6, 34.0, 30.0, 21.5.

**IR (neat, cm<sup>-1</sup>):** 2924, 2857, 1597, 1482, 1347, 1165, 1098, 954, 755, 690.

**HRMS (ESI):** [M+H]<sup>+</sup> calcd for C<sub>26</sub>H<sub>33</sub>NO<sub>4</sub>S 454.2047, found 454.2061.

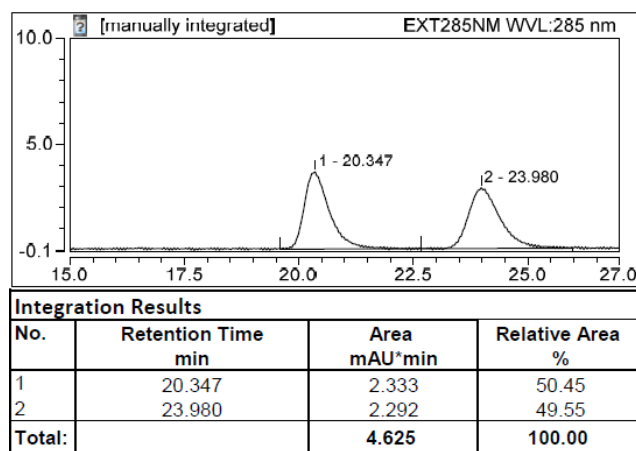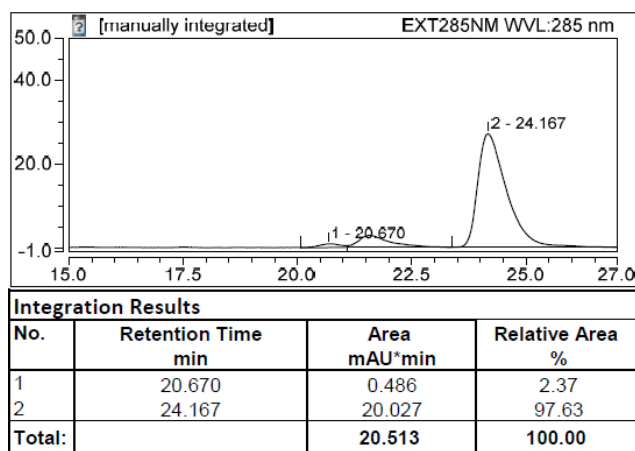

**(S)-4-(cyclohex-1-en-1-ylmethyl)-4-methylchromane (3aj)**

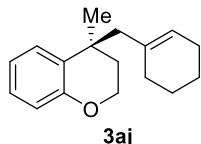

The compound was prepared according to the General Procedure from the reaction of **1p** (57.6 mg, 0.2 mmol) and **2a** (46.0 mg, 0.2 mmol). 28.1 mg, 58% yield, 94% ee, colorless oil.

**Chiral HPLC:** CHIRALCEL OD-H, 25 °C, *i*PrOH-hexanes 0/100, 0.3 mL/min, 226 nm,  $t_R$ (major) = 18.5 min,  $t_R$ (minor) = 19.0 min.

$[\alpha]_D^{21} = +1$  ( $c = 1.0$ , CH<sub>2</sub>Cl<sub>2</sub>).

**<sup>1</sup>H NMR (400 MHz, CDCl<sub>3</sub>):** δ 7.26-7.24 (m, 1 H), 7.06 (t, *J* = 8.0 Hz, 1 H), 6.88-6.84 (m, 1 H), 6.77 (d, *J* = 8.0 Hz, 1 H), 5.39 (s, 1 H), 4.21-4.14 (m, 2 H), 2.44-2.22 (m, 2 H), 2.05-1.66 (m, 6 H), 1.55-1.46 (m, 4 H), 1.31 (s, 3 H).

**<sup>13</sup>C NMR (100 MHz, CDCl<sub>3</sub>):** δ 153.9, 135.0, 131.1, 127.5, 126.9, 126.2, 120.1, 116.9, 63.0, 51.2, 34.5, 33.8, 30.7, 30.4, 25.5, 23.1, 22.2.

**IR (neat, cm<sup>-1</sup>):** 3410, 2918, 1594, 1447, 1420, 1261, 1117, 1042, 892, 750.

**HRMS (ESI):** [M+H]<sup>+</sup> calcd for C<sub>17</sub>H<sub>23</sub>O 243.1743, found 243.1748.

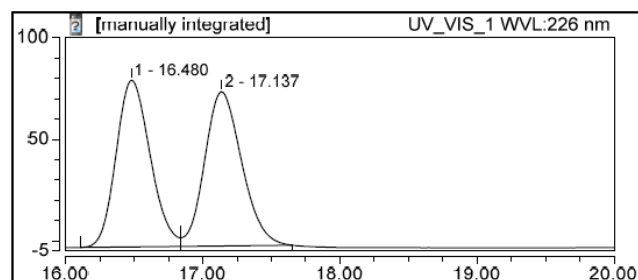

| Integration Results |                    |              |                 |
|---------------------|--------------------|--------------|-----------------|
| No.                 | Retention Time min | Area mAU*min | Relative Area % |
| 1                   | 16.480             | 23.612       | 49.82           |
| 2                   | 17.137             | 23.781       | 50.18           |
| Total:              |                    | 47.394       | 100.00          |

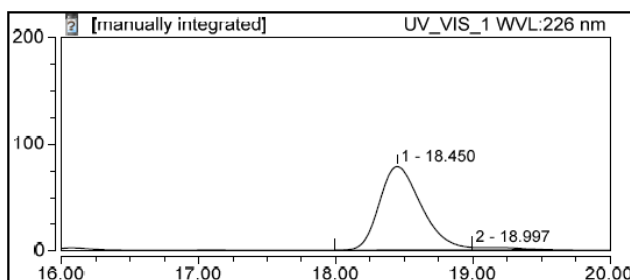

| Integration Results |                    |              |                 |
|---------------------|--------------------|--------------|-----------------|
| No.                 | Retention Time min | Area mAU*min | Relative Area % |
| 1                   | 18.450             | 27.891       | 97.13           |
| 2                   | 18.997             | 0.823        | 2.87            |
| Total:              |                    | 28.714       | 100.00          |

**(*R*)-(3-(cyclohex-1-en-1-ylmethyl)-3-methyl-2,3-dihydrobenzofuran-5-yl)(piperidin-1-yl)methanone (3al)**

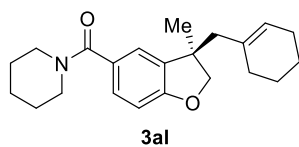

The compound was prepared according to the General Procedure from the reaction of **1r** (138.6 mg, 0.36 mmol) and **2a** (46.0 mg, 0.2 mmol).

30.6 mg, 45% yield, 92% ee, white solid, mp: 77-79 °C.

**Chiral HPLC:** CHIRALPAK IA, 25 °C, *i*PrOH-hexanes 5/95, 1 mL/min, 280 nm, *t*<sub>R</sub>(major) = 13.8 min, *t*<sub>R</sub>(minor) = 15.6 min.

[α]<sub>D</sub><sup>22</sup> = +22 (c = 1.0, CH<sub>2</sub>Cl<sub>2</sub>).

**<sup>1</sup>H NMR (400 MHz, CDCl<sub>3</sub>):** δ 7.18 (dd, *J* = 2.0, 4.0 Hz, 2 H), 6.74 (d, *J* = 8.8 Hz, 1 H), 5.40 (s, 1 H), 4.51 (d, *J* = 8.4 Hz, 1 H), 4.19 (d, *J* = 8.4 Hz, 1 H), 3.53 (brs, 4 H), 2.33-2.25 (m, 2 H), 1.98 (s, 2 H), 1.77-1.43 (m, 12 H), 1.32 (s, 3 H).

**<sup>13</sup>C NMR (100 MHz, CDCl<sub>3</sub>):** δ 170.7, 160.4, 136.0, 134.2, 128.4, 127.5, 126.2, 122.6, 108.9, 82.8, 49.0, 48.7, 45.4, 43.6, 30.1, 26.4, 26.2, 25.8, 25.3, 24.6, 22.9, 22.0.

**IR (neat, cm<sup>-1</sup>):** 3569, 3450, 1655, 1638, 1473, 1277, 1262, 1074, 766, 751.

**HRMS (ESI):** [M+H]<sup>+</sup> calcd for C<sub>22</sub>H<sub>30</sub>NO<sub>2</sub> 340.2271, found 340.2272.

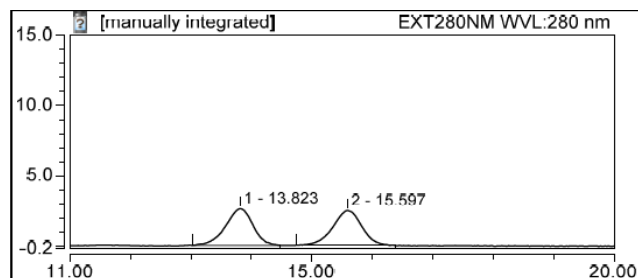

| Integration Results |                       |                 |                    |
|---------------------|-----------------------|-----------------|--------------------|
| No.                 | Retention Time<br>min | Area<br>mAU*min | Relative Area<br>% |
| 1                   | 13.823                | 1.373           | 49.97              |
| 2                   | 15.597                | 1.375           | 50.03              |
| Total:              |                       | 2.748           | 100.00             |

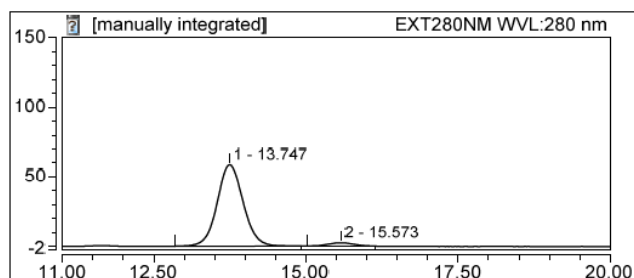

| Integration Results |                       |                 |                    |
|---------------------|-----------------------|-----------------|--------------------|
| No.                 | Retention Time<br>min | Area<br>mAU*min | Relative Area<br>% |
| 1                   | 13.747                | 28.995          | 96.12              |
| 2                   | 15.573                | 1.169           | 3.88               |
| Total:              |                       | 30.164          | 100.00             |

### ***Tert*-butyl (R)-3-(cyclohex-1-en-1-ylmethyl)-3-methylindoline-1-carboxylate (**3am**)**

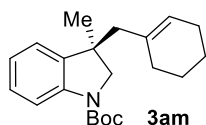

The compound was prepared according to the General Procedure from the reaction of **1x** (74.6 mg, 0.2 mmol) and **2a** (46.0 mg, 0.2 mmol) in DMF.

30.1 mg, 46% yield, 83% ee, colorless oil.

**Chiral HPLC:** CHIRALCEL OD-H, 25 °C, *i*PrOH-hexanes 0.2/99.8, 0.75 mL/min, 284 nm,  $t_R(\text{major}) = 21.5$  min,  $t_R(\text{minor}) = 24.2$  min.

$[\alpha]_D^{22} = -25$  ( $c = 2.0$ ,  $\text{CH}_2\text{Cl}_2$ ).

**$^1\text{H}$  NMR (400 MHz,  $\text{CDCl}_3$ , mixture of rotamers):**  $\delta$  [7.81 (s), 7.42 (s), 1 H], 7.15 (t,  $J = 8.0$  Hz, 1 H), 7.04 (d,  $J = 8.0$  Hz, 1 H), 6.94 (t,  $J = 8.0$  Hz, 1 H), 5.37 (s, 1 H), 3.97 (s, 1 H), 3.56 (s, 1 H), 2.22 (s, 2 H), 1.96 (s, 2 H), 1.64-1.40 (m, 15 H), 1.30 (s, 3 H).

**$^{13}\text{C}$  NMR (100 MHz,  $\text{CDCl}_3$ , mixture of rotamers):**  $\delta$  152.5, 142.1, 141.1, 140.2, 139.2, 134.6, 127.5, 125.8, 122.5, 122.1, 114.6, 81.3, 80.2, 59.7, 50.1, 43.1, 42.44, 30.1, 28.5, 27.3, 25.5, 23.0, 22.1.

**IR (neat,  $\text{cm}^{-1}$ ):** 2927, 1704, 1600, 1485, 1393, 1291, 1147, 1017, 859, 750.

**HRMS (ESI):**  $[\text{M}+\text{H}]^+$  calcd for  $\text{C}_{21}\text{H}_{30}\text{NO}_2$  328.2271, found 328.2277.

NOTE: Because of the amide bond rotation equilibrium, the rotamers of **3am** were observed on the NMR. This phenomenon is seen with many tertiary amides. For related references, see: ref. 19-20.

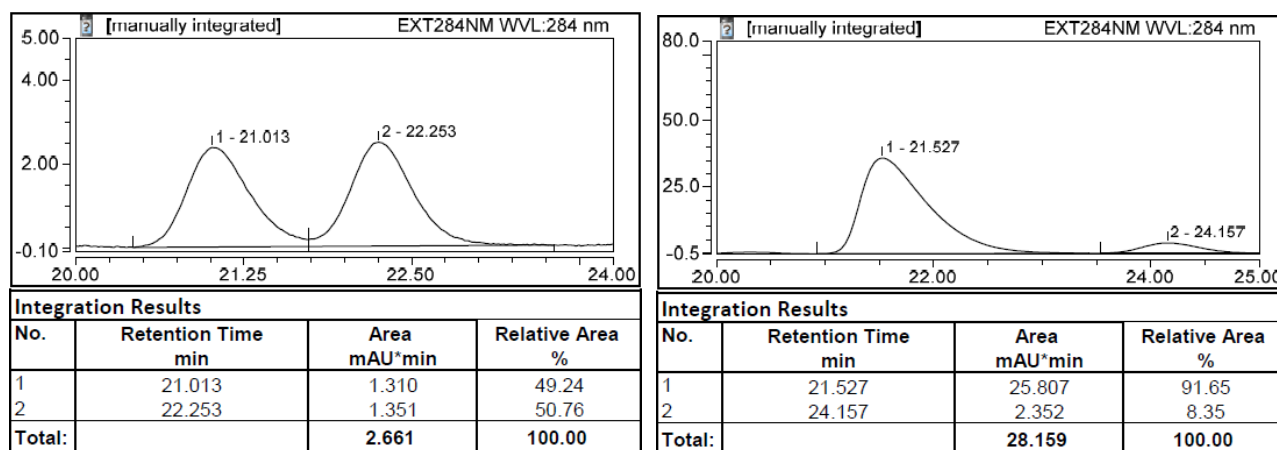

***Tert*-butyl(R)-3-methyl-3-((1-tosyl-1,2,3,6-tetrahydropyridin-4-yl)methyl)indoline-1-carboxylate (3an)**

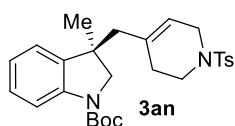

The compound was prepared according to the General Procedure from the reaction of **1x** (74.6mg, 0.2 mmol) and **2k** (77.0 mg, 0.2 mmol) in DMF.

48.2 mg, 50% yield, 91% ee, colorless oil.

**Chiral HPLC:** CHIRALPAK IA, 25 °C, *i*PrOH-hexanes 10/90, 1 mL/min, 280 nm,  $t_R$ (major) = 15.2 min,  $t_R$ (minor) = 16.7 min.

$[\alpha]_D^{22} = -13$  ( $c = 2.0$ , CH<sub>2</sub>Cl<sub>2</sub>).

**<sup>1</sup>H NMR (400 MHz, CDCl<sub>3</sub>, mixture of rotamers):**  $\delta$  [7.78 (s), 7.35 (s), 1 H], 7.62 (t,  $J = 8.0$  Hz, 2 H), 7.30 (d,  $J = 8.0$  Hz, 2 H), 7.15 (t,  $J = 8.0$  Hz, 1 H), 7.04 (d,  $J = 4.0$  Hz, 1 H), 6.94-6.91 (m, 1 H), 5.29 (d,  $J = 4.0$  Hz, 1 H), 3.87 (s, 1 H), 3.50 (m, 3 H), 2.97 (d,  $J = 4.0$  Hz, 2 H), 2.42 (s, 3 H), 2.23 (s, 2 H), 1.89-1.67 (m, 2 H), 1.51 (s, 9 H), 1.27 (d,  $J = 8.0$  Hz, 3 H).

**<sup>13</sup>C NMR (100 MHz, CDCl<sub>3</sub>, mixture of rotamers):**  $\delta$  152.2, 143.4, 141.9, 138.9, 133.5, 133.1, 129.6, 127.9, 127.6, 122.5, 122.2, 120.1, 114.7, 81.4, 59.3, 48.6, 44.7, 42.8, 42.5, 29.9, 28.4, 27.1, 21.5.

**IR (neat, cm<sup>-1</sup>):** 2975, 2925, 1698, 1598, 1484, 1393, 1164, 1018, 951, 712.

**HRMS (ESI):**  $[M+H]^+$  calcd for C<sub>27</sub>H<sub>35</sub>N<sub>2</sub>O<sub>4</sub>S 483.2312, found 483.2321.

NOTE: Because of the amide bond rotation equilibrium, the rotamers of **3an** were observed on the NMR. This phenomenon is seen with many tertiary amides. For related references, see: ref. 19-20.

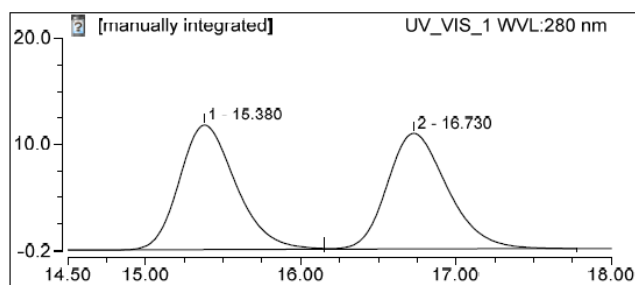

| Integration Results |                    |              |                 |
|---------------------|--------------------|--------------|-----------------|
| No.                 | Retention Time min | Area mAU*min | Relative Area % |
| 1                   | 15.380             | 4.970        | 50.25           |
| 2                   | 16.730             | 4.920        | 49.75           |
| Total:              |                    | 9.890        | 100.00          |

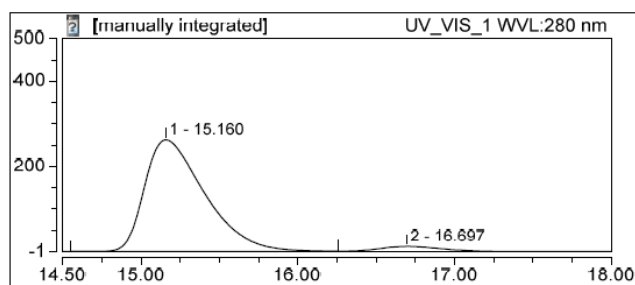

| Integration Results |                    |              |                 |
|---------------------|--------------------|--------------|-----------------|
| No.                 | Retention Time min | Area mAU*min | Relative Area % |
| 1                   | 15.160             | 116.761      | 95.63           |
| 2                   | 16.697             | 5.338        | 4.37            |
| Total:              |                    | 122.099      | 100.00          |

***Tert*-butyl(R)-3-((1,4-dioxaspiro[4.5]dec-7-en-8-yl)methyl)-3-methylindoline-1-carboxylate (**3ao**)**

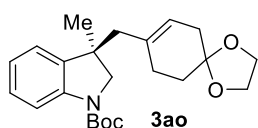

The compound was prepared according to the General Procedure from the reaction of **1x** (74.6mg, 0.2 mmol) and **2h** (57.6 mg, 0.2 mmol) in DMF.

29.3 mg, 38% yield, 84% ee, colorless oil.

**Chiral HPLC:** CHIRALPAK ID, 25 °C, *i*PrOH-hexanes 2/98, 1 mL/min, 280 nm,  $t_R$ (major) = 9.7 min,  $t_R$ (minor) = 12.7 min.

$[\alpha]_D^{21} = -11$  ( $c = 1.0$ , CH<sub>2</sub>Cl<sub>2</sub>).

**<sup>1</sup>H NMR (400 MHz, CDCl<sub>3</sub>):**  $\delta$  [7.81(s), 7.41 (s), 1 H], 7.16 (t,  $J = 8.0$  Hz, 1 H), 7.09 (d,  $J = 8.0$  Hz, 1 H), 6.95 (t,  $J = 4.0$  Hz, 1 H), 5.30 (s, 1 H), 3.97-3.89 (m, 5 H), 3.59 (s, 1 H), 2.27-2.23 (d,  $J = 4.0$  Hz), 1.89-1.76 (m, 2 H), 1.64-1.57 (m, 11 H), 1.32 (s, 3 H).

**<sup>13</sup>C NMR (150 MHz, CDCl<sub>3</sub>, mixture of rotamers):**  $\delta$  152.5, 142.1, 139.9, 134.3, 127.7, 122.7, 122.1, 114.7, 107.6, 81.4, 80.4, 64.3, 59.9, 48.7, 43.1, 35.9, 31.3, 29.1, 28.5, 27.0.

**IR (neat, cm<sup>-1</sup>):** 2925, 1703, 1599, 1485, 1393, 1256, 1147, 1080, 857, 751.

**HRMS (ESI):**  $[M+H]^+$  calcd for C<sub>23</sub>H<sub>32</sub>NO<sub>4</sub> 386.2326, found 386.2337.

NOTE: Because of the amide bond rotation equilibrium, the rotamers of **3ao** were observed on the NMR. This phenomenon is seen with many tertiary amides. For related references, see: ref. 19-20.

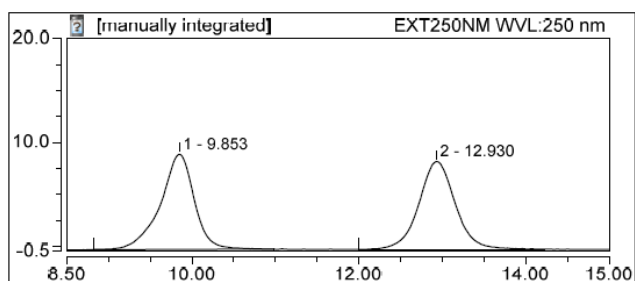

| Integration Results |                    |              |                 |
|---------------------|--------------------|--------------|-----------------|
| No.                 | Retention Time min | Area mAU*min | Relative Area % |
| 1                   | 9.853              | 4.322        | 50.33           |
| 2                   | 12.930             | 4.266        | 49.67           |
| Total:              |                    | 8.588        | 100.00          |

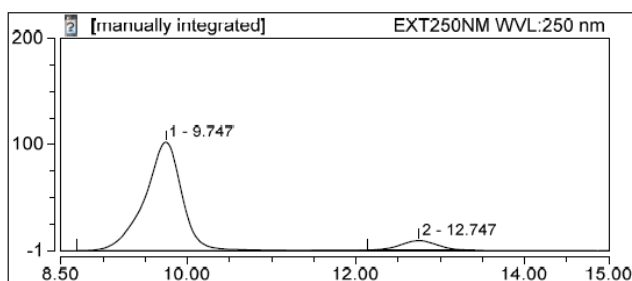

| Integration Results |                    |              |                 |
|---------------------|--------------------|--------------|-----------------|
| No.                 | Retention Time min | Area mAU*min | Relative Area % |
| 1                   | 9.747              | 52.292       | 91.80           |
| 2                   | 12.747             | 4.668        | 8.20            |
| Total:              |                    | 56.961       | 100.00          |

### ***Tert*-butyl (R)-3-((1*H*-inden-2-yl)methyl)-3-methylindoline-1-carboxylate (**3ap**)**

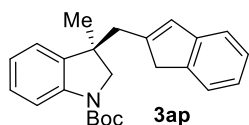

The compound was prepared according to the General Procedure from the reaction of **1x** (74.6 mg, 0.2 mmol) and **2m** (52.8 mg, 0.2 mmol) in DMF.

38.3 mg, 53% yield, 97% ee, colorless oil.

**Chiral HPLC:** CHIRALCEL OD-H, 25 °C, *i*PrOH-hexanes 4/96, 1 mL/min, 284 nm,  $t_R$ (major) = 5.4 min,  $t_R$ (minor) = 6.1 min.

$[\alpha]_D^{21} = -24$  ( $c = 1.0$ , CH<sub>2</sub>Cl<sub>2</sub>).

**<sup>1</sup>H NMR (400 MHz, CDCl<sub>3</sub>, mixture of isomers):**  $\delta$  [7.82 (s), 7.39 (s), 1 H], 7.37-7.07 (m, 6 H), 7.01-6.97 (m, 1 H), 6.51 (d,  $J = 4.0$  Hz, 1 H), 4.04-3.98 (m, 1 H), 3.65 (s, 1 H), 3.12-2.89 (m, 2 H), 2.81 (s, 2 H), 1.50 (s, 9 H), 1.40 (s, 3 H).

**<sup>13</sup>C NMR (100 MHz, CDCl<sub>3</sub>, mixture of isomers):**  $\delta$  152.4, 145.8, 144.9, 143.4, 142.1, 139.1, 130.4, 127.9, 126.2, 123.9, 123.3, 122.7, 122.3, 120.2, 114.8, 81.8, 80.5, 59.4, 43.5, 42.8, 42.5, 28.4, 27.9.

**IR (neat, cm<sup>-1</sup>):** 3424, 2975, 2928, 1700, 1599, 1460, 1392, 1147, 857, 751.

**HRMS (ESI):**  $[M+H]^+$  calcd for C<sub>24</sub>H<sub>28</sub>NO<sub>2</sub> 362.2125, found 362.2123.

NOTE: Because of the amide bond rotation equilibrium, the rotamers of **3ap** were observed on the NMR. This phenomenon is seen with many tertiary amides. For related references, see: ref. 19-20.

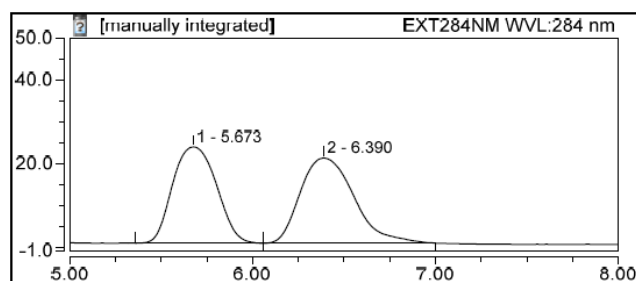

| Integration Results |                    |              |                 |
|---------------------|--------------------|--------------|-----------------|
| No.                 | Retention Time min | Area mAU*min | Relative Area % |
| 1                   | 5.673              | 6.398        | 48.03           |
| 2                   | 6.390              | 6.924        | 51.97           |
| Total:              |                    | 13.322       | 100.00          |

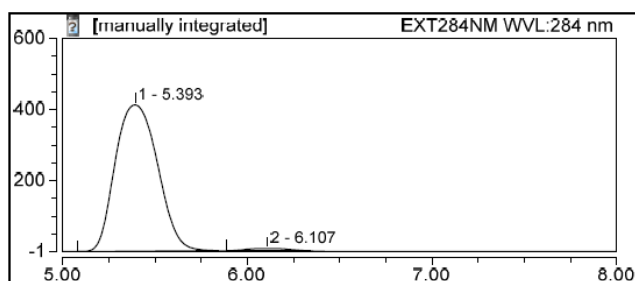

| Integration Results |                    |              |                 |
|---------------------|--------------------|--------------|-----------------|
| No.                 | Retention Time min | Area mAU*min | Relative Area % |
| 1                   | 5.393              | 109.721      | 98.41           |
| 2                   | 6.107              | 1.777        | 1.59            |
| Total:              |                    | 111.498      | 100.00          |

### (R)-1-(3-(cyclohex-1-en-1-ylmethyl)-3-methylindolin-1-yl)ethan-1-one (3aq)

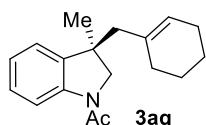

The compound was prepared according to the General Procedure from the reaction of **1y** (63.0 mg, 0.2 mmol) and **2a** (46.0 mg, 0.2 mmol) in DMF.

24.7 mg, 46% yield, 92% ee, colorless oil.

**Chiral HPLC:** CHIRALPAK IA, 25 °C, *i*PrOH-hexanes 10/90, 1 mL/min, 280 nm,  $t_R$ (major) = 6.7 min,  $t_R$ (minor) = 8.3 min.

$[\alpha]_D^{21} = -13$  ( $c = 1.0$ ,  $\text{CH}_2\text{Cl}_2$ ).

**$^1\text{H}$  NMR (400 MHz,  $\text{CDCl}_3$ ):**  $\delta$  8.15 (d,  $J = 8.0$  Hz, 1 H), 7.15 (t,  $J = 8.0$  Hz, 1 H), 7.12 (d,  $J = 8.0$  Hz, 1 H), 7.04 (d,  $J = 8.0$  Hz, 1 H), 5.42 (s, 1 H), 4.03 (d,  $J = 8.0$  Hz, 1 H), 3.64 (d,  $J = 8.0$  Hz, 1 H), 2.26-1.97 (m, 5 H), 1.65 (s, 2 H), 1.57-1.36 (m, 6 H), 1.31 (s, 3 H).

**$^{13}\text{C}$  NMR (100 MHz,  $\text{CDCl}_3$ ):**  $\delta$  168.4, 142.1, 139.6, 134.9, 127.8, 125.9, 123.6, 122.4, 116.9, 60.8, 50.3, 43.8, 30.0, 27.4, 25.5, 24.2, 22.9, 22.1.

**IR (neat,  $\text{cm}^{-1}$ ):** 2923, 1663, 1597, 1481, 1460, 1402, 1120, 1043, 753, 618.

**HRMS (ESI):**  $[\text{M}+\text{H}]^+$  calcd for  $\text{C}_{18}\text{H}_{23}\text{NO}$  270.1852, found 270.1859.

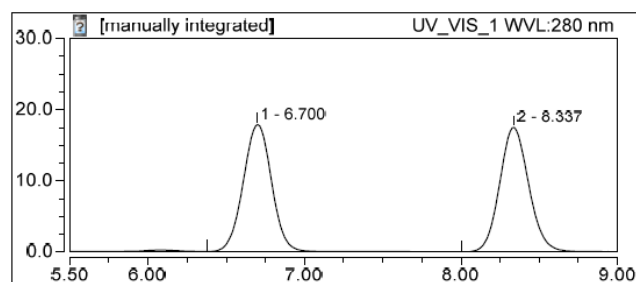

| Integration Results |                    |              |                 |
|---------------------|--------------------|--------------|-----------------|
| No.                 | Retention Time min | Area mAU*min | Relative Area % |
| 1                   | 6.700              | 3.726        | 49.53           |
| 2                   | 8.337              | 3.797        | 50.47           |
| Total:              |                    | 7.524        | 100.00          |

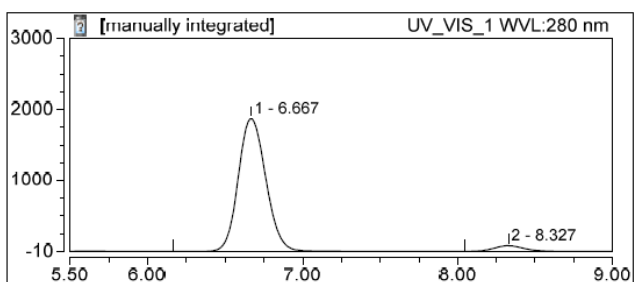

| Integration Results |                    |              |                 |
|---------------------|--------------------|--------------|-----------------|
| No.                 | Retention Time min | Area mAU*min | Relative Area % |
| 1                   | 6.667              | 384.636      | 95.82           |
| 2                   | 8.327              | 16.788       | 4.18            |
| Total:              |                    | 401.425      | 100.00          |

### *Tert*-butyl (R)-3-(cyclohex-1-en-1-ylmethyl)-3,6-dimethylindoline-1-carboxylate (3ar)



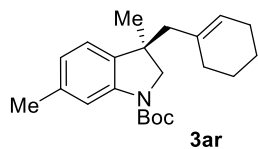

The compound was prepared according to the General Procedure from the reaction of **1z** (77.4 mg, 0.2 mmol) and **2a** (46.0 mg, 0.2 mmol) in DMF.

51.2 mg, 75% yield, 83% ee, colorless oil.

$[\alpha]_D^{21} = -21$  ( $c = 2.0$ ,  $\text{CH}_2\text{Cl}_2$ ).

**Chiral HPLC:** CHIRALCEL OD-H, 25 °C, *i*PrOH-hexanes 0.2/99.8, 0.75 mL/min, 280 nm,  $t_R(\text{major}) = 23.8$  min,  $t_R(\text{minor}) = 25.4$  min.

**$^1\text{H}$  NMR (600 MHz,  $\text{CDCl}_3$ , mixture of rotamers):**  $\delta$  [7.67 (s), 7.26 (s), 1 H], 6.97 (d,  $J = 6.0$  Hz, 1 H), 6.77 (d,  $J = 6.0$  Hz, 1 H), 5.37 (s, 1 H), 3.96 (s, 1 H), 3.59-3.53 (m, 1 H), 2.32 (s, 3 H), 2.21 (t,  $J = 12.0$  Hz, 2 H), 1.97 (s, 2 H), 1.65-1.42 (m, 15 H), 1.28 (s, 3 H).

**$^{13}\text{C}$  NMR (150 MHz,  $\text{CDCl}_3$ , mixture of rotamers):**  $\delta$  152.5, 142.3, 137.5, 136.7, 134.8, 125.7, 122.8, 122.3, 115.4, 80.2, 60.1, 50.1, 42.8, 30.2, 28.5, 27.4, 25.5, 23.1, 22.2, 21.7.

**IR (neat,  $\text{cm}^{-1}$ ):** 2926, 2836, 1705, 1592, 1498, 1389, 1243, 1161, 1027, 764.

**HRMS (ESI):**  $[\text{M}+\text{H}]^+$  calcd for  $\text{C}_{22}\text{H}_{32}\text{NO}_2$  342.2428, found 342.2434.

NOTE: Because of the amide bond rotation equilibrium, the rotamers of **3ar** were observed on the NMR. This phenomenon is seen with many tertiary amides. For related references, see: ref. 19-20.

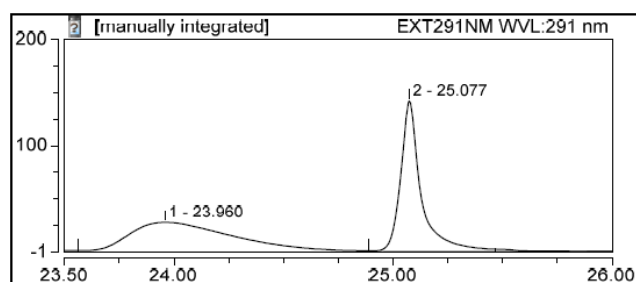

| Integration Results |                    |              |                 |
|---------------------|--------------------|--------------|-----------------|
| No.                 | Retention Time min | Area mAU*min | Relative Area % |
| 1                   | 23.960             | 15.431       | 49.72           |
| 2                   | 25.077             | 15.604       | 50.28           |
| Total:              |                    | 31.034       | 100.00          |

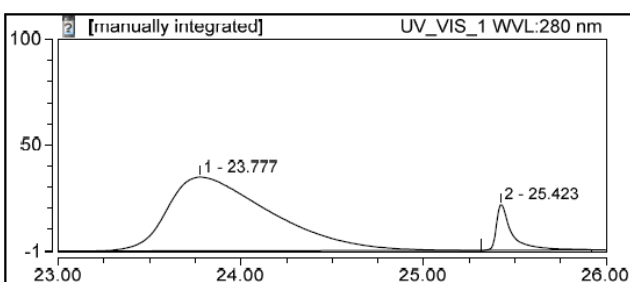

| Integration Results |                    |              |                 |
|---------------------|--------------------|--------------|-----------------|
| No.                 | Retention Time min | Area mAU*min | Relative Area % |
| 1                   | 23.777             | 22.871       | 91.44           |
| 2                   | 25.423             | 2.140        | 8.56            |
| Total:              |                    | 25.011       | 100.00          |

### ***Tert*-butyl(R)-3,6-dimethyl-3-((1-(tosyl)-1,2,3,6-tetrahydropyridin-4-yl)methyl)indoline-1-carboxylate (**3as**)**

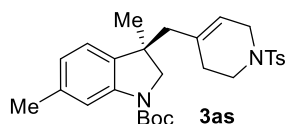

The compound was prepared according to the General Procedure from the reaction of **1z** (77.4 mg, 0.2 mmol) and **2k** (77.0 mg, 0.2 mmol) in DMF.

91.3 mg, 92% yield, 96% ee, colorless oil.

**Chiral HPLC:** CHIRALPAK IB, 25 °C, *i*PrOH-hexanes 2/98, 1 mL/min, 290 nm,  $t_R(\text{major}) = 30.0$  min,  $t_R(\text{minor}) = 33.7$  min.

$[\alpha]_D^{21} = -25$  ( $c = 2.0$ ,  $\text{CH}_2\text{Cl}_2$ ).

**<sup>1</sup>H NMR (400 MHz, CDCl<sub>3</sub>, mixture of rotamers):** [δ 7.64 (s), 7.27 (s), 1 H], 7.63 (d, *J* = 8.0 Hz, 2 H), 7.30 (d, *J* = 8.0 Hz, 2 H), 6.91 (d, *J* = 7.6 Hz, 1 H), 6.74 (d, *J* = 7.6 Hz, 1 H), 5.29 (s, 1 H), 3.85 (s, 1 H), 3.51 (s, 3 H), 2.98 (s, 2 H), 2.41 (s, 3 H), 2.31 (s, 3 H), 2.22 (s, 2 H), 1.89-1.72 (m, 2 H), 1.51 (s, 9 H), 1.25 (s, 3 H).

**<sup>13</sup>C NMR (100 MHz, CDCl<sub>3</sub>, mixture of rotamers):** δ 152.3, 143.4, 142.0, 137.7, 135.6, 133.6, 133.1, 129.5, 127.6, 122.8, 122.1, 120.7, 115.4, 81.4, 80.3, 59.5, 48.6, 44.7, 42.8, 42.5, 29.9, 28.3, 27.2, 21.6, 21.4.

**IR (neat, cm<sup>-1</sup>):** 3428, 2974, 1699, 1595, 1497, 1347, 1163, 1028, 890, 737.

**HRMS (ESI):** [M+H]<sup>+</sup> calcd for C<sub>28</sub>H<sub>37</sub>N<sub>2</sub>O<sub>4</sub>S 497.2477, found 497.2469.

NOTE: Because of the amide bond rotation equilibrium, the rotamers of **3as** were observed on the NMR. This phenomenon is seen with many tertiary amides. For related references, see: ref. 19-20.

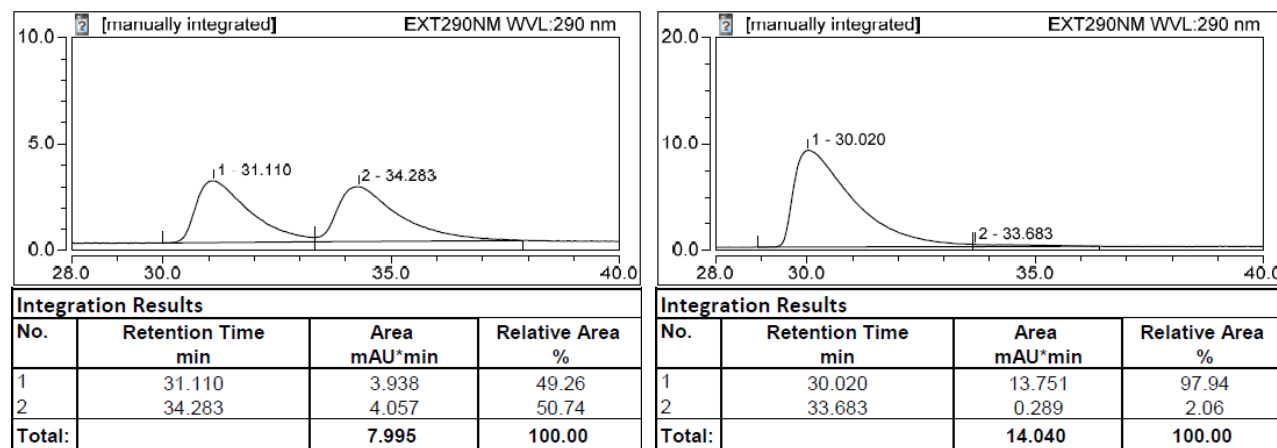

***Tert*-butyl (R)-3-(cyclohex-1-en-1-ylmethyl)-3,5-dimethylindoline-1-carboxylate (**3at**)**

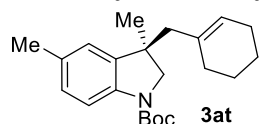

The compound was prepared according to the General Procedure from the reaction of **1aa** (77.4 mg, 0.2 mmol) and **2a** (46.0 mg, 0.2 mmol) in DMF.

49.1 mg, 72% yield, 85% ee, colorless oil.

[α]<sub>D</sub><sup>21</sup> = -7 (c = 1.5, CH<sub>2</sub>Cl<sub>2</sub>).

**Chiral HPLC:** CHIRALCEL OD-H, 25 °C, *i*-PrOH-hexanes 0.2/99.8, 0.75 mL/min, 280 nm, *t*<sub>R</sub>(minor) = 17.3 min, *t*<sub>R</sub>(major) = 18.7 min.

**<sup>1</sup>H NMR (400 MHz, CDCl<sub>3</sub>, mixture of rotamers):** δ [7.67 (s), 7.28 (s), 1 H], 6.95 (d, *J* = 8.0 Hz, 1 H), 6.88 (s, 1 H), 5.38 (s, 1 H), 3.96 (s, 1 H), 3.53 (m, 1 H), 2.30 (s, 3 H), 2.21 (s, 2 H), 1.96 (s, 2 H), 1.55-1.44 (m, 15 H), 1.28 (s, 3 H).

**<sup>13</sup>C NMR (100 MHz, CDCl<sub>3</sub>, mixture of rotamers):** δ 152.5, 139.8, 134.7, 131.5, 128.0, 125.7, 123.3, 114.3, 81.0, 80.1, 59.8, 50.0, 43.1, 42.5, 30.1, 28.5, 27.2, 25.5, 23.0, 22.2, 21.0.

**HRMS (ESI):** [M+H]<sup>+</sup> calcd for C<sub>22</sub>H<sub>32</sub>NO<sub>2</sub> 342.2428, found 342.2434.

**IR (neat, cm<sup>-1</sup>):** 3424, 2927, 1701, 1637, 1494, 1456, 1390, 1243, 1019, 858, 763.

**HRMS (ESI):** [M+H]<sup>+</sup> calcd for C<sub>22</sub>H<sub>32</sub>NO<sub>2</sub> 342.2428, found 342.2432.

NOTE: Because of the amide bond rotation equilibrium, the rotamers of **3at** were observed on the NMR. This phenomenon is seen with many tertiary amides. For related references, see: ref. 19-20.

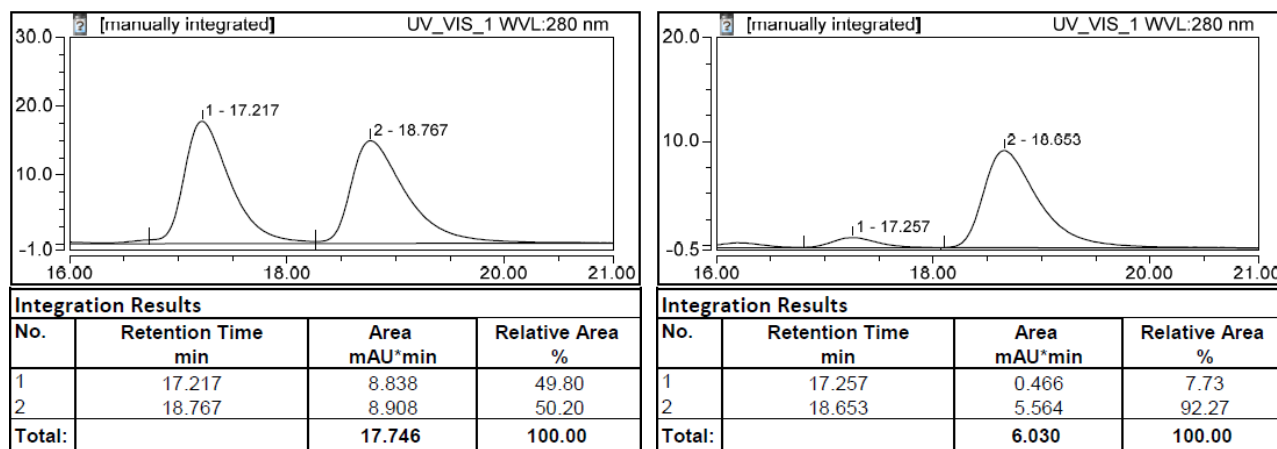

***Tert*-butyl(R)-6-chloro-3-(cyclohex-1-en-1-ylmethyl)-3-methylindoline-1-carboxylate (**3au**)**

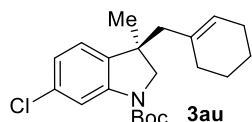

The compound was prepared according to the General Procedure from the reaction of **1ab** (81.4 mg, 0.2 mmol) and **2a** (46.0 mg, 0.2 mmol) in DMF.

41.9 mg, 58% yield, 96% ee, colorless oil.

$[\alpha]_D^{21} = -49$  ( $c = 1.0$ , CH<sub>2</sub>Cl<sub>2</sub>).

**Chiral HPLC:** CHIRALCEL OD-H, 25 °C, *i*PrOH-hexanes 0.2/99.8, 0.75 mL/min, 280 nm,  $t_R$ (minor) = 13.8 min,  $t_R$ (major) = 16.3 min.

**<sup>1</sup>H NMR (400 MHz, CDCl<sub>3</sub>, mixture of rotamers):**  $\delta$  [7.85 (s), 7.40 (s), 1 H], 6.97 (d,  $J = 8.0$  Hz, 1 H), 6.91 (dd,  $J = 4.0$  Hz, 1 H), 5.36 (s, 1 H), 3.98 (d,  $J = 8.0$  Hz, 1 H), 3.57 (s, 1 H), 2.20-2.19 (m, 2 H), 1.96 (d,  $J = 8.0$  Hz, 2 H), 1.60-1.44 (m, 15 H), 1.29 (s, 3 H).

**<sup>13</sup>C NMR (100 MHz, CDCl<sub>3</sub>, mixture of rotamers):**  $\delta$  152.2, 143.3, 137.8, 134.3, 133.1, 126.1, 123.3, 122.0, 115.0, 81.9, 80.7, 60.0, 50.0, 42.9, 42.2, 30.2, 28.4, 27.4, 25.5, 23.0, 22.1.

**IR (neat, cm<sup>-1</sup>):** 2928, 2836, 1706, 1599, 1486, 1386, 1152, 1081, 921, 860.

**HRMS (ESI):** [M+H]<sup>+</sup> calcd for C<sub>21</sub>H<sub>29</sub>ClNO<sub>2</sub> 362.1881, found 362.1889.

NOTE: Because of the amide bond rotation equilibrium, the rotamers of **3au** were observed on the NMR. This phenomenon is seen with many tertiary amides. For related references, see: ref. 19-20.

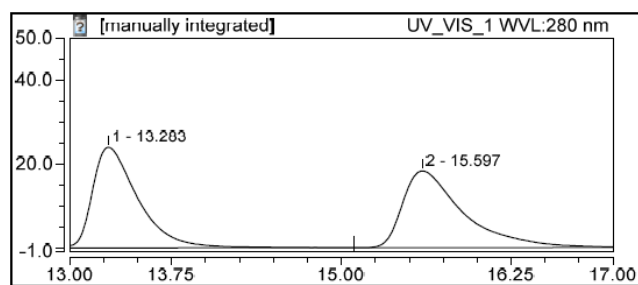

| Integration Results |                    |              |                 |
|---------------------|--------------------|--------------|-----------------|
| No.                 | Retention Time min | Area mAU*min | Relative Area % |
| 1                   | 13.283             | 9.340        | 49.56           |
| 2                   | 15.597             | 9.505        | 50.44           |
| Total:              |                    | 18.845       | 100.00          |

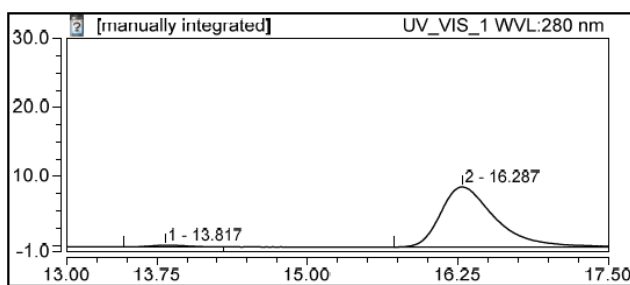

| Integration Results |                    |              |                 |
|---------------------|--------------------|--------------|-----------------|
| No.                 | Retention Time min | Area mAU*min | Relative Area % |
| 1                   | 13.817             | 0.092        | 1.96            |
| 2                   | 16.287             | 4.616        | 98.04           |
| Total:              |                    | 4.708        | 100.00          |

**(R)-8-((1-methyl-2,3-dihydro-1H-inden-1-yl)methyl)-1,4-dioxaspiro[4.5]dec-7-ene (3av)**

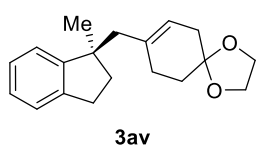

3av

The compound was prepared according to the General Procedure from the reaction of **1ac** (54.4 mg, 0.2 mmol) and **2h** (57.6 mg, 0.2 mmol).

43.2 mg, 76% yield, 90% ee, colorless oil.

**Chiral HPLC:** CHIRALCEL OJ-H, 25 °C, *i*-PrOH-hexanes 5/95, 1 mL/min, 273 nm,  $t_R$ (major) = 7.1 min,  $t_R$ (minor) = 8.1 min.

$[\alpha]_D^{25} = +18$  (c = 0.78, CH<sub>2</sub>Cl<sub>2</sub>).

**<sup>1</sup>H NMR (400 MHz, CDCl<sub>3</sub>):** δ 7.18-7.10 (m, 4 H), 5.28 (d, *J* = 3.2 Hz, 1 H), 3.97-3.90 (m, 4 H), 2.93-2.78 (m, 2 H), 2.28-2.20 (m, 4 H), 2.14-2.08 (m, 1 H), 1.89-1.81 (m, 3 H), 1.66-1.59 (m, 2 H), 1.26 (s, 3 H).

**<sup>13</sup>C NMR (100 MHz, CDCl<sub>3</sub>):** δ 151.4, 143.1, 135.5, 126.2, 126.0, 124.4, 122.7, 122.0, 107.8, 64.2, 48.5, 47.7, 38.9, 35.8, 31.3, 30.3, 29.3, 27.5.

**IR (neat, cm<sup>-1</sup>):** 2956, 2928, 1479, 1450, 11377, 1256, 1112, 1060, 863, 759.

**HRMS (ESI):** [M+H]<sup>+</sup> calcd for C<sub>19</sub>H<sub>25</sub>O<sub>2</sub> 285.1849, found 285.1851.

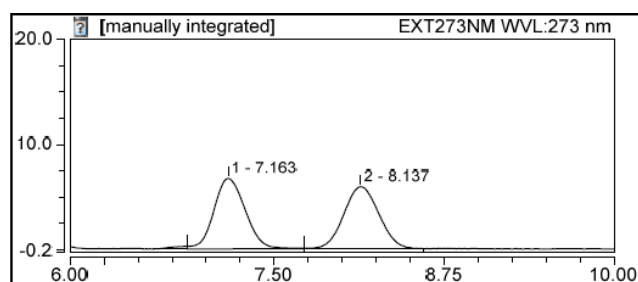

| Integration Results |                    |              |                 |
|---------------------|--------------------|--------------|-----------------|
| No.                 | Retention Time min | Area mAU*min | Relative Area % |
| 1                   | 7.163              | 1.798        | 50.41           |
| 2                   | 8.137              | 1.768        | 49.59           |
| Total:              |                    | 3.566        | 100.00          |

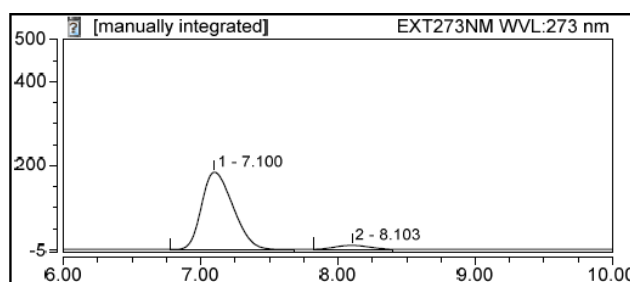

| Integration Results |                    |              |                 |
|---------------------|--------------------|--------------|-----------------|
| No.                 | Retention Time min | Area mAU*min | Relative Area % |
| 1                   | 7.100              | 48.776       | 94.87           |
| 2                   | 8.103              | 2.635        | 5.13            |
| Total:              |                    | 51.411       | 100.00          |

**(R)-4-((1-methyl-2,3-dihydro-1H-inden-1-yl)methyl)-1-tosyl-1,2,3,6-tetrahydropyridine (3aw)**

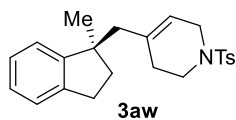

The compound was prepared according to the General Procedure from the reaction of **1ac** (54.4 mg, 0.2 mmol) and **2k** (77.0 mg, 0.2 mmol) in DMF.

43.4 mg, 57% yield, 84% ee, colorless oil.

**Chiral HPLC:** CHIRALCEL AS-H, 25 °C, *i*PrOH-hexanes 5/95, 1 mL/min, 260 nm,  $t_R$ (minor) = 29.1 min,  $t_R$ (major) = 30.6 min.

$[\alpha]_D^{22} = -4$  ( $c = 1.0$ ,  $\text{CH}_2\text{Cl}_2$ ).

**$^1\text{H}$  NMR (400 MHz,  $\text{CDCl}_3$ ):**  $\delta$  7.64 (d,  $J = 8.0$  Hz, 2 H), 7.30 (d,  $J = 8.4$  Hz, 2 H), 7.26-7.04 (m, 4 H), 5.26 (s, 1 H), 3.63-3.45 (m, 2 H), 3.15-2.88 (m, 2 H), 2.83-2.80 (m, 2 H), 2.42 (s, 3 H), 2.26-2.18 (m, 2 H), 2.05-2.00 (m, 1 H), 1.98-1.74 (m, 3 H), 1.20 (s, 3 H).

**$^{13}\text{C}$  NMR (100 MHz,  $\text{CDCl}_3$ ):**  $\delta$  150.8, 143.4, 142.9, 134.7, 133.3, 129.5, 127.6, 126.4, 126.1, 124.5, 122.5, 120.0, 48.8, 47.6, 44.8, 42.9, 38.4, 30.3, 30.2, 27.6, 21.4.

**IR (neat,  $\text{cm}^{-1}$ ):** 3386, 2924, 1600, 1458, 1346, 1162, 1096, 1039, 816, 761.

**HRMS (ESI):**  $[\text{M}+\text{H}]^+$  calcd for  $\text{C}_{23}\text{H}_{28}\text{NO}_2\text{S}$  382.1835, found 382.1842.

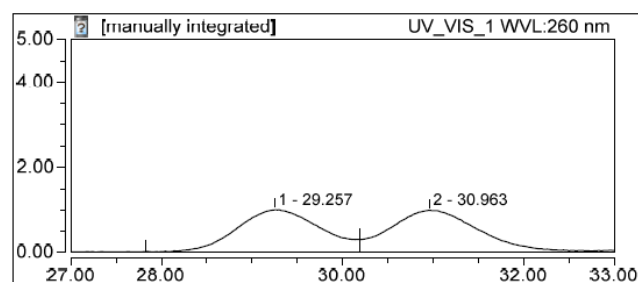

| Integration Results |                    |              |                 |
|---------------------|--------------------|--------------|-----------------|
| No.                 | Retention Time min | Area mAU*min | Relative Area % |
| 1                   | 29.257             | 1.041        | 49.01           |
| 2                   | 30.963             | 1.084        | 50.99           |
| Total:              |                    | 2.125        | 100.00          |

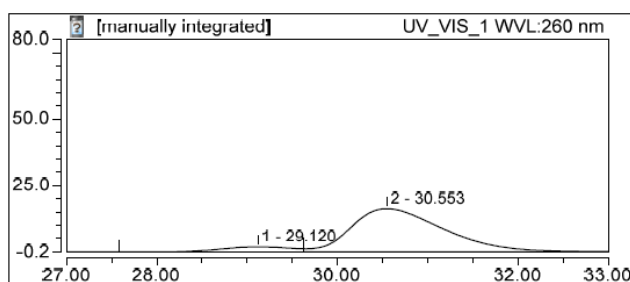

| Integration Results |                    |              |                 |
|---------------------|--------------------|--------------|-----------------|
| No.                 | Retention Time min | Area mAU*min | Relative Area % |
| 1                   | 29.120             | 1.717        | 8.10            |
| 2                   | 30.553             | 19.473       | 91.90           |
| Total:              |                    | 21.190       | 100.00          |

### (R)-2-((1-methyl-2,3-dihydro-1H-inden-1-yl)methyl)-1H-indene (**3ax**)

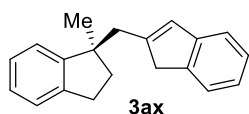

The compound was prepared according to the General Procedure from the reaction of **1ac** (54.4 mg, 0.2 mmol) and **2m** (52.8 mg, 0.2 mmol) in DMF.

23.4 mg, 45% yield, 92% ee, colorless oil.

**Chiral HPLC:** CHIRALCEL OJ-H, 25 °C, *i*PrOH-hexanes 5/95, 1 mL/min, 260 nm,  $t_R$ (minor) = 8.0 min,  $t_R$ (major) = 10.6 min.

$[\alpha]_D^{21} = -1$  ( $c = 1.0$ ,  $\text{CH}_2\text{Cl}_2$ ).

**$^1\text{H}$  NMR (400 MHz,  $\text{CDCl}_3$ ):**  $\delta$  7.23-7.18 (m, 2 H), 7.15-7.00 (m, 5 H), 6.99 (d,  $J = 1.2$  Hz, 1 H), 6.43 (s, 1 H), 3.05-2.85 (m, 2 H), 2.79-2.65 (m, 4 H), 2.15-1.76 (m, 2 H), 1.26 (s, 3 H).

**$^{13}\text{C}$  NMR (100 MHz,  $\text{CDCl}_3$ ):**  $\delta$  151.0, 147.7, 145.3, 143.6, 143.2, 129.7, 126.5, 126.3, 126.1, 124.6, 123.6, 123.3, 122.6, 119.9, 48.1, 43.0, 42.8, 38.3, 30.2, 27.9.

**IR (neat, cm<sup>-1</sup>):** 3440, 2962, 1636, 1459, 1416, 1316, 1260, 1094, 798, 755

**HRMS (ESI):** [M+H]<sup>+</sup> calcd for C<sub>20</sub>H<sub>21</sub> 261.1644, found 261.1638.

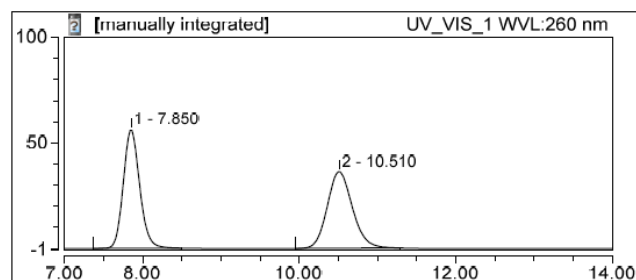

| Integration Results |                    |              |                 |
|---------------------|--------------------|--------------|-----------------|
| No.                 | Retention Time min | Area mAU*min | Relative Area % |
| 1                   | 7.850              | 13.595       | 50.12           |
| 2                   | 10.510             | 13.527       | 49.88           |
| Total:              |                    | 27.122       | 100.00          |

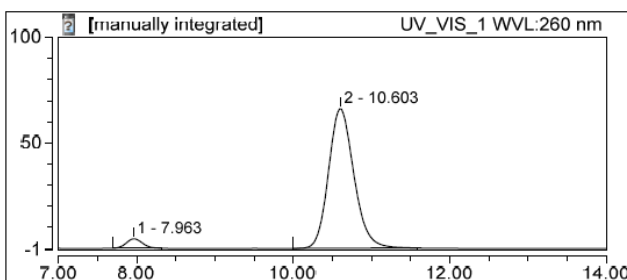

| Integration Results |                    |              |                 |
|---------------------|--------------------|--------------|-----------------|
| No.                 | Retention Time min | Area mAU*min | Relative Area % |
| 1                   | 7.963              | 1.054        | 4.07            |
| 2                   | 10.603             | 24.852       | 95.93           |
| Total:              |                    | 25.906       | 100.00          |

**(R)-4-((1-methyl-2,3-dihydro-1H-inden-1-yl)methyl)-1,2-dihydronaphthalene (3ay)**

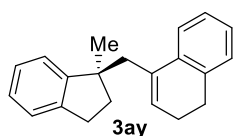

The compound was prepared according to the General Procedure from the reaction of **1ac** (54.4 mg, 0.2 mmol) and **2n** (55.6 mg, 0.2 mmol) in DMF.

25.2mg, 46% yield, 89% ee, colorless oil.

**Chiral HPLC:** CHIRALCEL OJ-H, 25 °C, <sup>i</sup>PrOH-hexanes 4/96, 1 mL/min, 260 nm, *t<sub>R</sub>*(minor) = 5.1 min, *t<sub>R</sub>*(major) = 5.8 min.

[α]<sub>D</sub><sup>23</sup> = -1 (c = 1.0, CH<sub>2</sub>Cl<sub>2</sub>).

**<sup>1</sup>H NMR (400 MHz, CDCl<sub>3</sub>):** δ 7.20-7.06 (m, 8 H), 5.66 (t, *J* = 4.8 Hz, 1 H), 2.88-2.60 (m, 6 H), 2.18-2.08 (m, 3 H), 1.76-1.69 (m, 1 H), 1.25 (s, 3 H).

**<sup>13</sup>C NMR (100 MHz, CDCl<sub>3</sub>):** δ 151.4, 143.2, 136.4, 136.1, 134.1, 128.8, 127.4, 126.3, 126.2, 125.9, 125.9, 124.4, 123.1, 123.0, 48.3, 42.3, 39.1, 30.2, 28.8, 27.1, 23.3.

**IR (neat, cm<sup>-1</sup>):** 3023, 2930, 1945, 1600, 1478, 1311, 1109, 1023, 756, 670.

**HRMS (ESI):** [M+H]<sup>+</sup> calcd for C<sub>21</sub>H<sub>23</sub> 275.1797, found 275.1794.

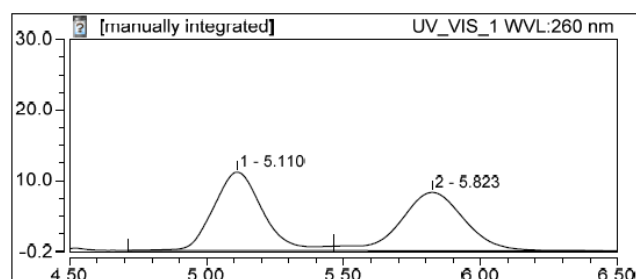

| Integration Results |                    |              |                 |
|---------------------|--------------------|--------------|-----------------|
| No.                 | Retention Time min | Area mAU*min | Relative Area % |
| 1                   | 5.110              | 2.301        | 50.84           |
| 2                   | 5.823              | 2.225        | 49.16           |
| Total:              |                    | 4.527        | 100.00          |

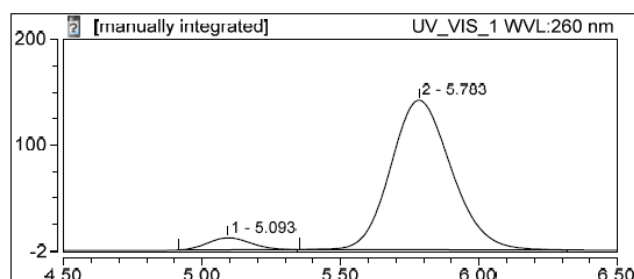

| Integration Results |                    |              |                 |
|---------------------|--------------------|--------------|-----------------|
| No.                 | Retention Time min | Area mAU*min | Relative Area % |
| 1                   | 5.093              | 2.028        | 5.32            |
| 2                   | 5.783              | 36.078       | 94.68           |
| Total:              |                    | 38.106       | 100.00          |

**(R)-2-((1,5-dimethyl-2,3-dihydro-1H-inden-1-yl)methyl)-1H-indene (3az)**

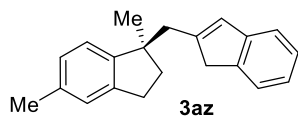

The compound was prepared according to the General Procedure from the reaction of **1ad** (57.2 mg, 0.2 mmol) and **2m** (57.6 mg, 0.2 mmol) in DMF. 18.6 mg, 34% yield, 95% ee, colorless oil.

**Chiral HPLC:** CHIRALCEL OJ-H, 25 °C, *i*PrOH-hexanes 5/95, 1 mL/min, 260 nm,  $t_R$ (minor) = 8.5 min,  $t_R$ (major) = 9.2 min.

$[\alpha]_D^{21} = +12$  ( $c = 0.5$ ,  $\text{CH}_2\text{Cl}_2$ ).

**$^1\text{H}$  NMR (400 MHz,  $\text{CDCl}_3$ ):**  $\delta$  7.30-7.20 (m, 3 H), 7.09-7.00 (m, 4 H), 6.50 (s, 1 H), 3.14-2.96 (m, 2 H), 2.82-2.70 (m, 4 H), 2.33 (s, 3 H), 2.18-1.87 (m, 2 H), 1.31 (s, 3H).

**$^{13}\text{C}$  NMR (100 MHz,  $\text{CDCl}_3$ ):**  $\delta$  147.9, 147.5, 145.3, 143.6, 143.4, 136.1, 129.6, 127.1, 126.1, 125.3, 123.6, 123.3, 122.4, 119.9, 47.7, 43.1, 42.8, 38.6, 30.1, 27.9, 21.3.

**IR (neat,  $\text{cm}^{-1}$ ):** 2922, 1959, 1593, 1460, 1421, 1260, 1119, 1037, 831, 799.

**HRMS (ESI):**  $[\text{M}+\text{H}]^+$  calcd for  $\text{C}_{21}\text{H}_{23}$  275.1794, found 275.1783.

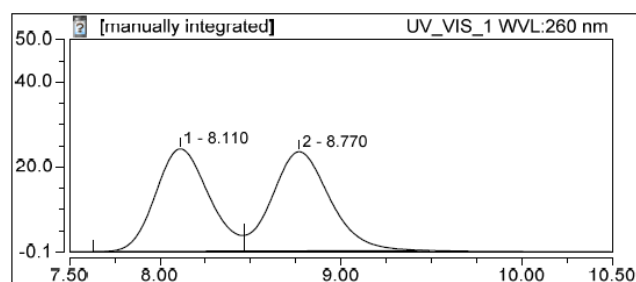

| Integration Results |                    |              |                 |
|---------------------|--------------------|--------------|-----------------|
| No.                 | Retention Time min | Area mAU*min | Relative Area % |
| 1                   | 8.110              | 8.265        | 48.87           |
| 2                   | 8.770              | 8.647        | 51.13           |
| Total:              |                    | 16.911       | 100.00          |

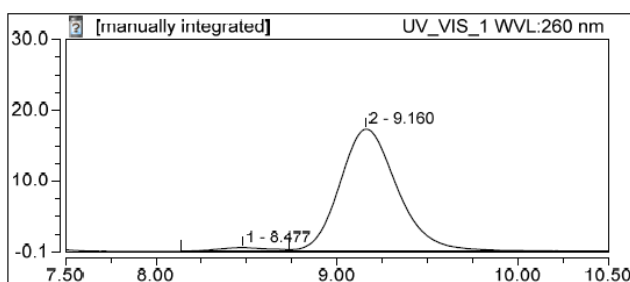

| Integration Results |                    |              |                 |
|---------------------|--------------------|--------------|-----------------|
| No.                 | Retention Time min | Area mAU*min | Relative Area % |
| 1                   | 8.477              | 0.170        | 2.60            |
| 2                   | 9.160              | 6.378        | 97.40           |
| Total:              |                    | 6.547        | 100.00          |

**(R)-8-((1,5-dimethyl-2,3-dihydro-1H-inden-1-yl)methyl)-1,4-dioxaspiro[4.5]dec-7-ene (3ba)**

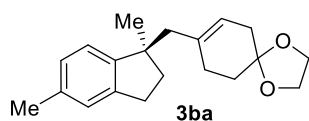

The compound was prepared according to the General Procedure from the reaction of **1ad** (57.2 mg, 0.2 mmol) and **2h** (57.6 mg, 0.2 mmol) in DMF. 22.1 mg, 37% yield, 90% ee, colorless oil.

**Chiral HPLC:** CHIRALCEL OJ-H, 25 °C, *i*PrOH-hexanes 5/95, 1 mL/min, 271 nm,  $t_R$ (major) = 6.0 min,  $t_R$ (minor) = 7.5 min.

$[\alpha]_D^{21} = +7$  ( $c = 1.0$ ,  $\text{CH}_2\text{Cl}_2$ ).

**$^1\text{H}$  NMR (400 MHz,  $\text{CDCl}_3$ ):**  $\delta$  7.02-6.96 (m, 3 H), 5.28 (s, 1 H), 3.97-3.93 (m, 4 H), 2.87-2.79 (m, 2 H), 2.31 (s, 3 H), 2.25-2.18 (m, 4 H), 2.13-2.07 (m, 1 H), 1.92 (s, 2 H), 1.90-1.79 (m, 1 H), 1.65-1.56 (m, 2 H), 1.24 (s, 3 H).

**$^{13}\text{C}$  NMR (100 MHz,  $\text{CDCl}_3$ ):**  $\delta$  148.7, 143.3, 135.9, 135.7, 126.8, 125.1, 122.5, 121.9, 107.9, 64.3, 48.5, 47.4, 39.2, 35.9, 31.4, 30.2, 29.4, 27.5, 21.2.

**IR (neat,  $\text{cm}^{-1}$ ):** 3370, 2921, 1590, 1453, 1424, 1378, 1259, 1115, 862, 816.

**HRMS (ESI):**  $[\text{M}+\text{H}]^+$  calcd for  $\text{C}_{20}\text{H}_{27}\text{O}$  298.1933, found 298.1939.

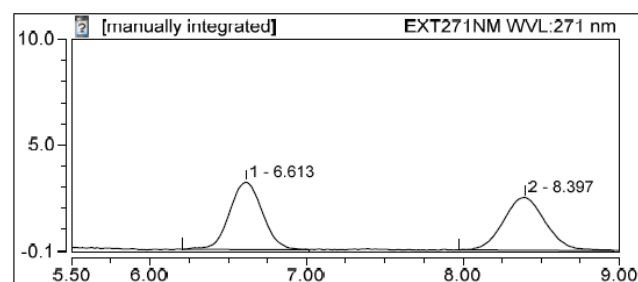

| Integration Results |                    |              |                 |
|---------------------|--------------------|--------------|-----------------|
| No.                 | Retention Time min | Area mAU*min | Relative Area % |
| 1                   | 6.613              | 0.777        | 50.02           |
| 2                   | 8.397              | 0.777        | 49.98           |
| Total:              |                    | 1.554        | 100.00          |

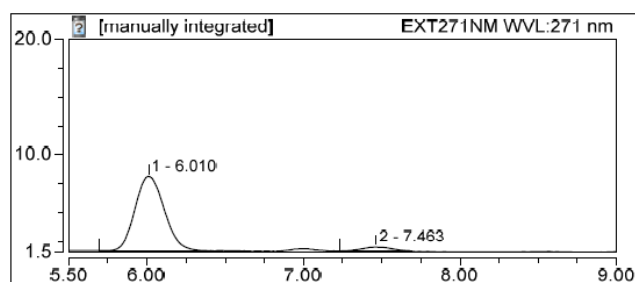

| Integration Results |                    |              |                 |
|---------------------|--------------------|--------------|-----------------|
| No.                 | Retention Time min | Area mAU*min | Relative Area % |
| 1                   | 6.010              | 1.394        | 94.93           |
| 2                   | 7.463              | 0.074        | 5.07            |
| Total:              |                    | 1.469        | 100.00          |

**(R)-4-((5-methyl-6,7-dihydro-5H-indeno[5,6-d][1,3]dioxol-5-yl)methyl)-1-tosyl-1,2,3,6-tetrahydropyridine (3bb)**

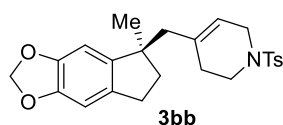

The compound was prepared according to the General Procedure from the reaction of **1ae** (63.2 mg, 0.2 mmol) and **2k** (77.0 mg, 0.2 mmol) in DMF.

42.5 mg, 50% yield, 94% ee, colorless oil.

**Chiral HPLC:** CHIRALCEL OD-H, 25 °C,  $i$ PrOH-hexanes 5/95, 1 mL/min, 293 nm,  $t_R$ (minor) = 29.0 min,  $t_R$ (major) = 31.0 min.

$[\alpha]_D^{21} = +14$  ( $c = 1.0$ ,  $\text{CH}_2\text{Cl}_2$ ).

**$^1\text{H}$  NMR (400 MHz,  $\text{CDCl}_3$ ):**  $\delta$  7.64 (d,  $J = 8.4$  Hz, 2 H), 7.31 (d,  $J = 8.0$  Hz, 2 H), 6.61 (s, 1 H), 6.53 (s, 1 H), 5.90 (dd,  $J = 1.2$  Hz,  $J = 7.2$  Hz, 2 H), 5.27 (s, 1 H), 3.63-3.44 (m, 2 H), 3.17-2.88 (m, 2 H), 2.72-2.68 (m, 2 H), 2.42 (s, 3 H), 2.20-2.13 (m, 2 H), 2.06-1.99 (m, 1 H), 1.86-1.73 (m, 3 H), 1.15 (s, 3 H).

**$^{13}\text{C}$  NMR (100 MHz,  $\text{CDCl}_3$ ):**  $\delta$  146.5, 146.4, 143.9, 143.4, 135.5, 134.7, 133.3, 129.6, 127.6, 120.0, 105.0, 103.2, 100.9, 49.0, 47.4, 44.8, 43.0, 38.7, 30.3, 30.2, 30.0, 21.5.

**IR (neat,  $\text{cm}^{-1}$ ):** 3435, 2086, 1638, 1474, 1417, 1349, 1162, 1097, 943, 711.

**HRMS (ESI):**  $[\text{M}+\text{H}]^+$  calcd for  $\text{C}_{24}\text{H}_{28}\text{NO}_4\text{S}$  426.1734, found 426.1743.



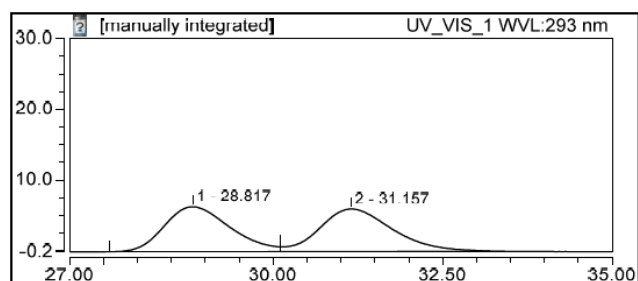

| Integration Results |                    |              |                 |
|---------------------|--------------------|--------------|-----------------|
| No.                 | Retention Time min | Area mAU*min | Relative Area % |
| 1                   | 28.817             | 7.157        | 49.21           |
| 2                   | 31.157             | 7.387        | 50.79           |
| Total:              |                    | 14.544       | 100.00          |

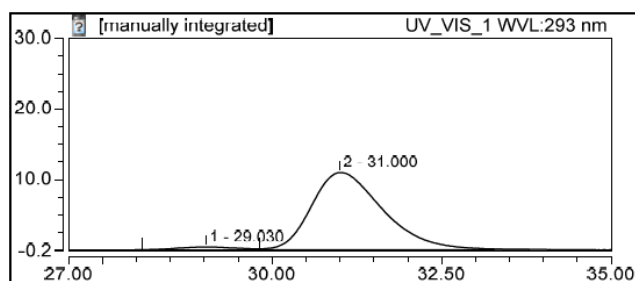

| Integration Results |                    |              |                 |
|---------------------|--------------------|--------------|-----------------|
| No.                 | Retention Time min | Area mAU*min | Relative Area % |
| 1                   | 29.030             | 0.406        | 2.95            |
| 2                   | 31.000             | 13.333       | 97.05           |
| Total:              |                    | 13.739       | 100.00          |

**(R)-5-((1H-inden-2-yl)methyl)-5-methyl-6,7-dihydro-5H-indeno[5,6-d][1,3]dioxole (3bc)**

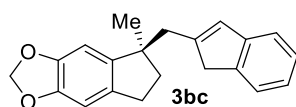

The compound was prepared according to the General Procedure from the reaction of **1ae** (63.2 mg, 0.2 mmol) and **2m** (77.0 mg, 0.2 mmol) in DMF.

31.0 mg, 51% yield, 94% ee, colorless oil.

**Chiral HPLC:** CHIRALCEL OJ-H, 25 °C, *i*PrOH-hexanes 10/90, 1 mL/min, 260 nm,  $t_R$ (minor) = 13.0 min,  $t_R$ (major) = 24.9 min.

$[\alpha]_D^{21} = +55$  (c = 1.0, CH<sub>2</sub>Cl<sub>2</sub>).

**<sup>1</sup>H NMR (400 MHz, CDCl<sub>3</sub>):** δ 7.31-7.27 (m, 2 H), 7.20 (d, *J* = 8.0 Hz, 1 H), 7.08 (t, *J* = 8.0 Hz, 1 H), 6.65 (s, 1 H), 6.61 (s, 1 H), 6.49 (s, 1 H), 5.93 (d, *J* = 16.0 Hz, 2 H), 3.15-2.96 (m, 2 H), 2.77-2.65 (m, 4 H), 2.20-1.87 (m, 2 H), 1.28 (s, 3 H).

**<sup>13</sup>C NMR (100 MHz, CDCl<sub>3</sub>):** δ 147.6, 146.6, 146.5, 145.3, 144.0, 143.6, 135.8, 129.7, 126.1, 123.7, 123.3, 120.0, 105.0, 103.3, 100.9, 47.9, 43.2, 42.7, 38.7, 30.2, 28.2.

**IR (neat, cm<sup>-1</sup>):** 2922, 1594, 1474, 1422, 1304, 1248, 1121, 1039, 941, 857.

**HRMS (ESI):** [M+H]<sup>+</sup> calcd for C<sub>21</sub>H<sub>21</sub>O<sub>2</sub> 305.1536, found 305.1552.

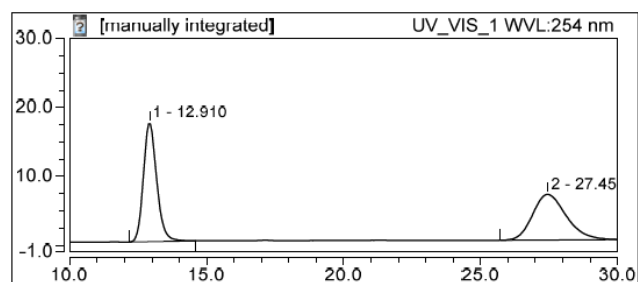

| Integration Results |                    |              |                 |
|---------------------|--------------------|--------------|-----------------|
| No.                 | Retention Time min | Area mAU*min | Relative Area % |
| 1                   | 12.910             | 9.726        | 50.76           |
| 2                   | 27.457             | 9.433        | 49.24           |
| Total:              |                    | 19.158       | 100.00          |

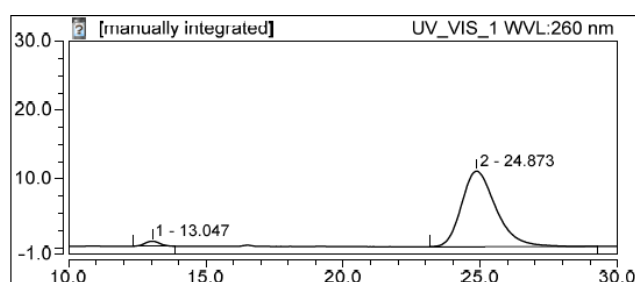

| Integration Results |                    |              |                 |
|---------------------|--------------------|--------------|-----------------|
| No.                 | Retention Time min | Area mAU*min | Relative Area % |
| 1                   | 13.047             | 0.450        | 2.73            |
| 2                   | 24.873             | 16.018       | 97.27           |
| Total:              |                    | 16.468       | 100.00          |

**Tert-butyl ((S)-1-(((S)-3,3-dimethyl-1-(4-(((R)-3-methyl-2,3-dihydrobenzofuran-3-yl)methyl)-**

### 3,6-dihydropyridin-1(2*H*)-yl)-1-oxobutan-2-yl)amino)-1-oxo-3-phenylpropan-2-yl)carbamate

(4)

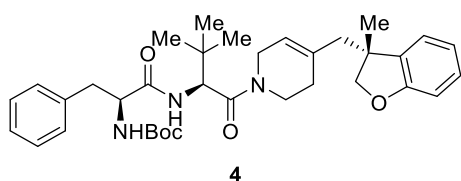

4

The compound was prepared according to the General Procedure from the reaction of **1a** (98.3 mg, 0.36 mmol) and **2w** (118.2 mg, 0.2 mmol).

91.9 mg, 78% yield, 97% de, white solid, mp: 66-68 °C.

**Chiral HPLC:** CHIRALPAK IA, 25 °C, *i*PrOH-hexanes 18/82, 0.2 mL/min, 280 nm,  $t_R$ (minor) = 131.5 min,  $t_R$ (major) = 138.2 min.

$[\alpha]_D^{23} = -18$  ( $c = 0.5$ , CH<sub>2</sub>Cl<sub>2</sub>).

**<sup>1</sup>H NMR (400 MHz, CDCl<sub>3</sub>, mixture of rotamers):**  $\delta$  7.25-7.06 (m, 7 H), 6.89-6.71 (m, 3 H), 5.40-5.34 (m, 1 H), 5.15 (s, 1 H), 4.82-4.76 (m, 1 H), 4.46-4.33 (m, 2 H), 4.16-3.02 (m, 7 H), 2.39-2.31 (m, 2 H), 1.91-1.56 (m, 2 H), 1.40-1.33 (m, 12 H), 0.92-0.83 (m, 9 H).

**<sup>13</sup>C NMR (100 MHz, CDCl<sub>3</sub>, mixture of rotamers):**  $\delta$  170.8, 170.6, 169.5, 169.4, 169.0, 159.28, 159.25, 159.22, 159.15, 155.1, 155.0, 136.5, 135.1, 134.8, 134.5, 134.4, 133.4, 133.2, 129.14, 129.10, 129.0, 128.5, 128.34, 128.25, 128.20, 128.15, 126.8, 126.6, 122.8, 122.7, 122.1, 121.2, 121.1, 120.33, 120.29, 109.6, 109.5, 81.8, 81.7, 81.6, 81.4, 79.8, 55.7, 54.6, 54.2, 54.0, 48.4, 48.0, 45.6, 45.43, 45.41, 45.3, 43.4, 43.3, 42.04, 42.00, 38.8, 38.7, 38.3, 38.0, 37.9, 35.80, 35.75, 35.7, 35.5, 30.2, 30.1, 29.7, 29.6, 28.13, 28.08, 26.4, 26.3, 26.1, 26.0, 25.9.

**IR (neat, cm<sup>-1</sup>):** 2993, 2963, 1675, 1477, 1362, 1321, 1226, 1182, 1088, 754, 688.

**HRMS (ESI):** [M+H]<sup>+</sup> calcd for C<sub>35</sub>H<sub>48</sub>N<sub>3</sub>O<sub>5</sub> 590.3588, found 590.3602.

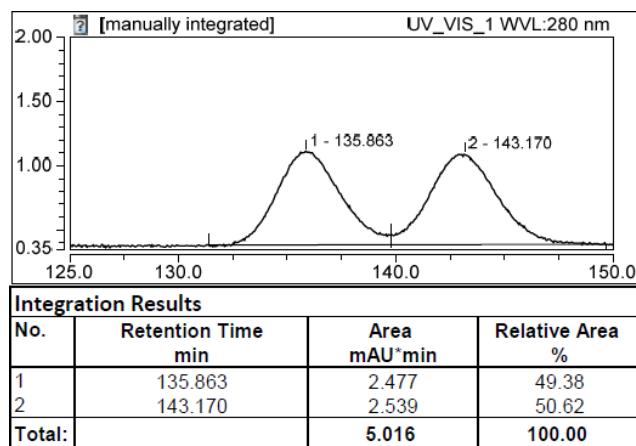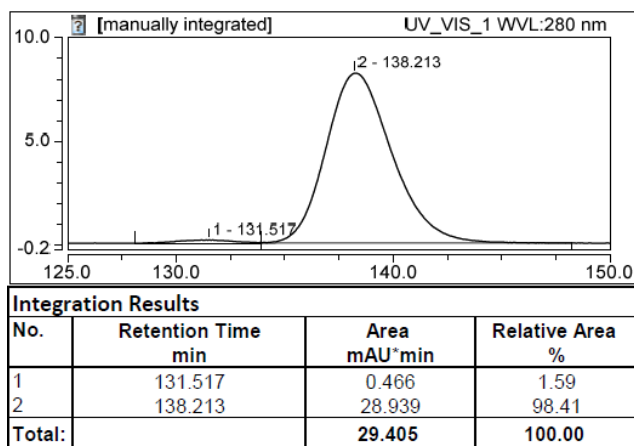

NOTE: Because of the amide bond rotation equilibrium, the rotamers of **4** were observed on the NMR. This phenomenon is seen with many tertiary amides. For related references, see: ref. 19-20.

(*R*)-5-((3-methyl-2,3-dihydrobenzofuran-3-yl)methyl)hex-5-en-1-yl 2-(1-(4-chlorobenzoyl)-5-

**methoxy-2-methyl-1H-indol-3-yl)acetate (5)**

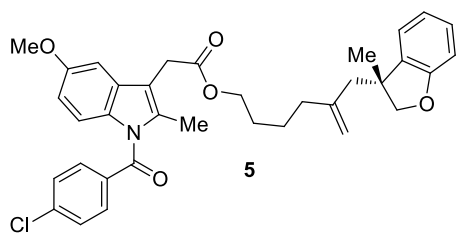

The compound was prepared according to the General Procedure from the reaction of **1a** (164.4 mg, 0.6 mmol) and **2x** (115.6 mg, 0.2 mmol).

49.1 mg, 42% yield, 94% ee, colorless oil.

**Chiral HPLC:** CHIRALPAK IB, 25 °C, *i*PrOH-hexanes 3/97,

1 mL/min, 203 nm,  $t_R$ (minor) = 31.8 min,  $t_R$ (major) = 33.8 min.

$[\alpha]_D^{21} = +1$  ( $c = 1.0$ ,  $\text{CH}_2\text{Cl}_2$ ).

**$^1\text{H}$  NMR (400 MHz,  $\text{CDCl}_3$ ):**  $\delta$  7.65 (d,  $J = 8.4$  Hz, 2 H), 7.46 (d,  $J = 8.4$  Hz, 2 H), 7.13-7.05 (m, 2 H), 6.96 (d,  $J = 2.4$  Hz, 1 H), 6.87-6.82 (m, 2 H), 6.76 (d,  $J = 8.0$  Hz, 1 H), 6.67-6.65 (m, 1 H), 4.80 (s, 1 H), 4.71 (s, 1 H), 4.47 (d,  $J = 8.8$  Hz, 1 H), 4.14 (d,  $J = 8.4$  Hz, 1 H), 4.03 (m, 2 H), 3.82 (s, 3 H), 3.65 (s, 2 H), 2.38 (s, 3 H), 2.34-2.27 (m, 2 H), 1.79-1.65 (m, 2 H), 1.54-1.44 (m, 2 H), 1.37-1.30 (m, 2 H), 1.34 (s, 3 H).

**$^{13}\text{C}$  NMR (100 MHz,  $\text{CDCl}_3$ ):**  $\delta$  170.9, 168.2, 159.3, 156.0, 145.7, 139.2, 135.8, 135.2, 133.9, 131.1, 130.8, 130.6, 129.1, 128.1, 122.8, 120.3, 114.9, 113.9, 112.7, 111.6, 109.6, 101.3, 81.8, 64.8, 55.6, 46.3, 45.3, 36.3, 30.4, 28.1, 26.3, 24.1, 13.3.

**IR (neat,  $\text{cm}^{-1}$ ):** 2943, 1735, 1687, 1597, 1480, 1321, 1224, 1167, 833, 755.

**HRMS (ESI):**  $[\text{M}+\text{H}]^+$  calcd for  $\text{C}_{35}\text{H}_{37}\text{ClINO}_5$  586.2355, found 586.2361.

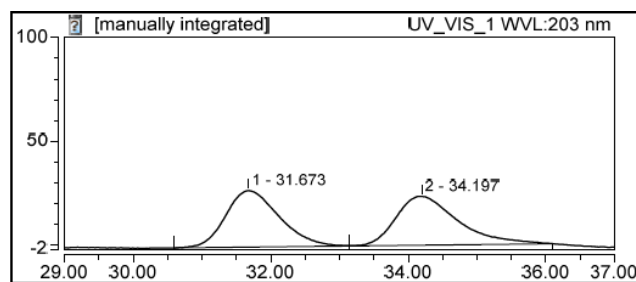

| Integration Results |                    |              |                 |
|---------------------|--------------------|--------------|-----------------|
| No.                 | Retention Time min | Area mAU*min | Relative Area % |
| 1                   | 31.673             | 24.693       | 50.11           |
| 2                   | 34.197             | 24.583       | 49.89           |
| Total:              |                    | 49.276       | 100.00          |

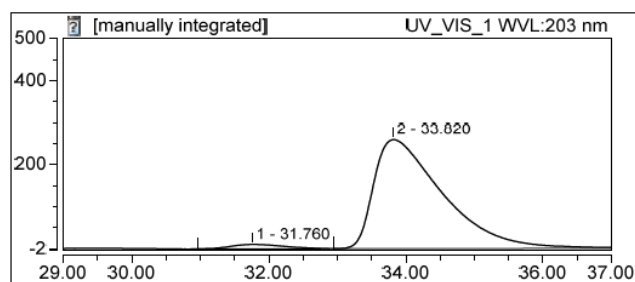

| Integration Results |                    |              |                 |
|---------------------|--------------------|--------------|-----------------|
| No.                 | Retention Time min | Area mAU*min | Relative Area % |
| 1                   | 31.760             | 9.443        | 3.03            |
| 2                   | 33.820             | 302.615      | 96.97           |
| Total:              |                    | 312.057      | 100.00          |

**(R)-2-(1-(4-chlorobenzoyl)-5-methoxy-2-methyl-1H-indol-3-yl)-1-(4-((3-methyl-2,3-dihydrobenzofuran-3-yl)methyl)-3,6-dihydropyridin-1(2H)-yl)ethan-1-one (6)**

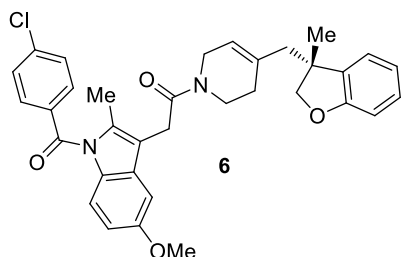

The compound was prepared according to the General Procedure from the reaction of **1a** (98.6 mg, 0.36 mmol) and **2y** (114.0 mg, 0.2 mmol).

73.8 mg, 65% yield, >99% ee, white solid, mp: 66-68 °C.

**Chiral HPLC:** CHIRALCEL OD-H, 25 °C, *i*PrOH-hexanes 30/70, 1 mL/min, 260 nm, *t*<sub>R</sub>(minor) = 19.7 min, *t*<sub>R</sub>(major) = 33.2 min. Approximate 1.25:1 ratio of rotamers.

[ $\alpha$ ]<sub>D</sub><sup>23</sup> = -6 (c = 0.5, CH<sub>2</sub>Cl<sub>2</sub>).

**<sup>1</sup>H NMR (400 MHz, CDCl<sub>3</sub>):**  $\delta$  7.65 (d, *J* = 8.4 Hz, 2 H), 7.45 (d, *J* = 7.6 Hz, 2 H), 7.12-7.08 (m, 1 H), 7.02 (t, *J* = 6.4 Hz, 1 H), 6.98 (d, *J* = 2.4 Hz, 1 H), 6.86-6.81 (m, 2 H), 6.73 (dd, *J* = 2.0, 8.0 Hz, 1 H), 6.64 (dd, *J* = 2.4, 9.2 Hz, 1 H), [5.38 (s), 5.27 (s), 1 H], 4.39-4.34 (m, 1 H), 4.16-3.90 (m, 3 H), 3.80 (d, *J* = 2.8 Hz, 3 H), 3.68-3.32 (m, 4 H), 2.36-2.29 (m, 5 H), 1.89-1.54 (m, 2 H), 1.30-1.25 (m, 3 H).

**<sup>13</sup>C NMR (100 MHz, CDCl<sub>3</sub>):**  $\delta$  168.71, 168.67, 168.1, 159.2, 155.8, 139.1, 139.0, 135.1, 135.0, 134.9, 134.7, 134.6, 133.81, 133.75, 132.9, 131.1, 130.70, 130.68, 130.62, 130.60, 128.98, 128.96, 128.20, 128.15, 122.7, 120.9, 120.31, 120.28, 114.7, 113.2, 111.4, 111.3, 109.6, 109.5, 101.4, 101.3, 81.70, 81.65, 55.54, 55.52, 48.2, 45.4, 45.3, 44.9, 42.8, 42.2, 38.7, 30.5, 30.4, 30.1, 29.6, 25.9, 25.8, 13.4, 13.3.

**IR (neat, cm<sup>-1</sup>):** 3302, 2970, 1709, 1627, 1482, 1455, 1262, 1172, 1017, 751.

**HRMS (ESI):** [M+H]<sup>+</sup> calcd for C<sub>34</sub>H<sub>34</sub>ClN<sub>2</sub>O<sub>4</sub> 569.2202, found 569.2209.

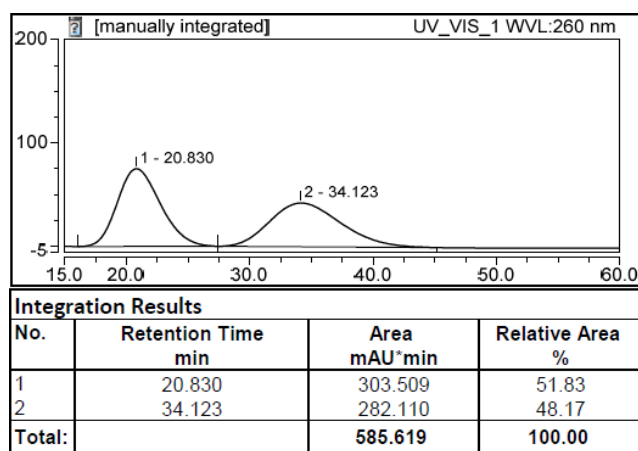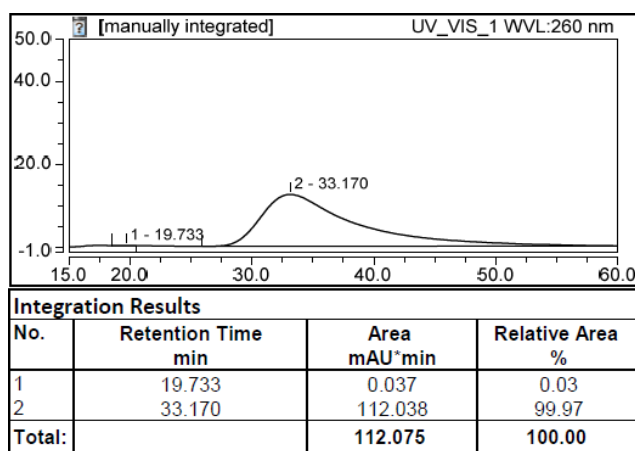

NOTE: Because of the amide bond rotation equilibrium, the rotamers of **4** were observed on the NMR. This phenomenon is seen with many tertiary amides. For related references, see: ref. 19-20.

**(8*S*,9*S*,13*S*,14*S*)-13-methyl-17-(((*R*)-3-methyl-2,3-dihydrobenzofuran-3-yl)methyl)-7,8,9,11,12,13,14,15-octahydro-6*H*-cyclopenta[*a*]phenanthren-3-yl acetate (**7**)**

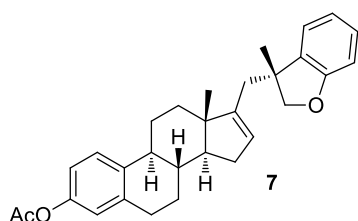

The compound was prepared according to the General Procedure from the reaction of **1a** (98.6 mg, 0.36 mmol) and **2z** (88.8 mg, 0.2 mmol).

75.1 mg, 85% yield, 99% de, white solid, mp: 123-125 °C.

**Chiral HPLC:** CHIRALPAK IA, 25 °C, *i*PrOH-hexanes 5/95, 1 mL/min, 288 nm,  $t_R$ (major) = 6.4 min,  $t_R$ (minor) = 7.8 min.

$[\alpha]_D^{20} = -61$  ( $c = 1.36$ , CH<sub>2</sub>Cl<sub>2</sub>).

**<sup>1</sup>H NMR (400 MHz, CDCl<sub>3</sub>):**  $\delta$  7.26-7.23 (m, 1 H), 7.15-7.09 (m, 2 H), 6.90-6.78 (m, 4 H), 5.16 (d,  $J = 1.2$  Hz, 1 H), 4.53 (d,  $J = 8.4$  Hz, 1 H), 4.27 (d,  $J = 8.4$  Hz, 1 H), 2.90-2.86 (m, 2 H), 2.46-2.11 (m, 8 H), 1.96-1.88 (m, 2 H), 1.76-1.73 (m, 1 H), 1.62-1.33 (m, 8 H), 1.33 (s, 3 H).

**<sup>13</sup>C NMR (100 MHz, CDCl<sub>3</sub>):**  $\delta$  169.8, 159.0, 150.8, 148.3, 138.2, 138.2, 136.2, 128.0, 126.0, 123.4, 122.6, 121.4, 120.4, 118.4, 109.5, 81.9, 55.3, 47.5, 44.5, 44.4, 37.2, 37.0, 34.4, 31.3, 29.4, 27.5, 26.9, 26.2, 21.1, 15.4.

**IR (neat, cm<sup>-1</sup>):** 2930, 2851, 1765, 1597, 1482, 1370, 1207, 1016, 974, 751.

**HRMS (ESI):** [M+H]<sup>+</sup> calcd for C<sub>30</sub>H<sub>35</sub>O<sub>3</sub> 443.2581, found 443.2587.

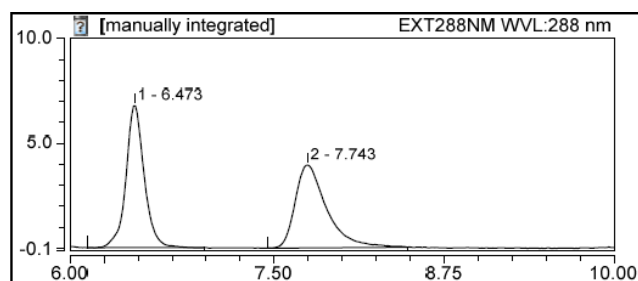

| Integration Results |                    |              |                 |
|---------------------|--------------------|--------------|-----------------|
| No.                 | Retention Time min | Area mAU*min | Relative Area % |
| 1                   | 6.473              | 1.051        | 49.78           |
| 2                   | 7.743              | 1.061        | 50.22           |
| Total:              |                    | 2.112        | 100.00          |

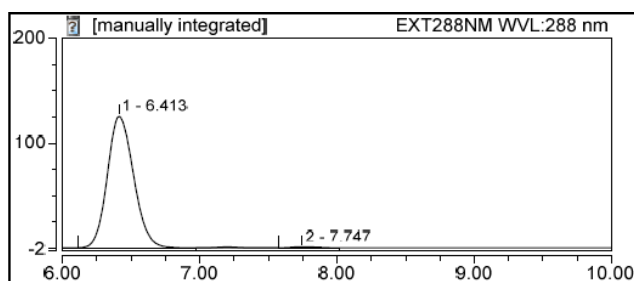

| Integration Results |                    |              |                 |
|---------------------|--------------------|--------------|-----------------|
| No.                 | Retention Time min | Area mAU*min | Relative Area % |
| 1                   | 6.413              | 27.970       | 99.30           |
| 2                   | 7.747              | 0.198        | 0.70            |
| Total:              |                    | 28.168       | 100.00          |

(8*R*,9*S*,10*R*,13*S*,14*S*,17*S*)-10,13-dimethyl-3-(((*R*)-3-methyl-2,3-dihydrobenzofuran-3-yl)methyl)-2,7,8,9,10,11,12,13,14,15,16,17-dodecahydro-1*H*-cyclopenta[*a*]phenanthren-17-yl acetate (**8**)

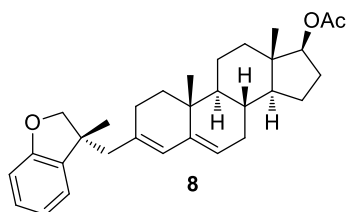

The compound was prepared according to the General Procedure from the reaction of **1a** (98.6 mg, 0.36 mmol) and **2aa** (92.4 mg, 0.2 mmol). 49.7 mg, 54% yield, 94% de, white solid, mp: 47-49 °C.

**Chiral HPLC:** CHIRALPAK IA, 25 °C, *i*PrOH-hexanes 5/95, 1 mL/min, 280 nm,  $t_R$ (major) = 4.8 min,  $t_R$ (minor) = 8.2 min.

$[\alpha]_D^{21} = -73$  ( $c = 1.0$ , CH<sub>2</sub>Cl<sub>2</sub>).

**<sup>1</sup>H NMR (400 MHz, CDCl<sub>3</sub>):**  $\delta$  7.14-7.09 (m, 2 H), 6.86 (t,  $J = 7.2$  Hz, 1 H), 6.75 (d,  $J = 8.0$  Hz, 1 H), 5.75 (s, 1 H), 5.34 (d,  $J = 2.8$  Hz, 1 H), 4.62-4.58 (m, 1 H), 4.49 (d,  $J = 8.8$  Hz, 1 H), 4.16 (d,  $J = 8.4$  Hz, 1 H), 2.38-2.33 (m, 2 H), 2.20-2.14 (m, 2 H), 2.04 (s, 3 H), 1.77-0.94 (m, 18 H), 0.85 (s, 3 H), 0.82 (s, 3 H).

**$^{13}\text{C}$  NMR (100 MHz,  $\text{CDCl}_3$ ):**  $\delta$  171.2, 159.4, 141.7, 135.4, 133.5, 128.5, 128.0, 123.0, 121.9, 120.3, 109.5, 82.7, 82.1, 51.2, 49.2, 48.2, 45.8, 42.5, 36.7, 34.7, 34.2, 31.6, 31.3, 27.9, 27.5, 26.4, 23.5, 21.2, 20.5, 18.7, 12.0.

**IR (neat,  $\text{cm}^{-1}$ ):** 2963, 1735, 1481, 1459, 1373, 1247, 1034, 978, 751, 689.

**HRMS (ESI):**  $[\text{M}+\text{H}]^+$  calcd for  $\text{C}_{31}\text{H}_{41}\text{O}_3$  461.3050, found 461.3068.

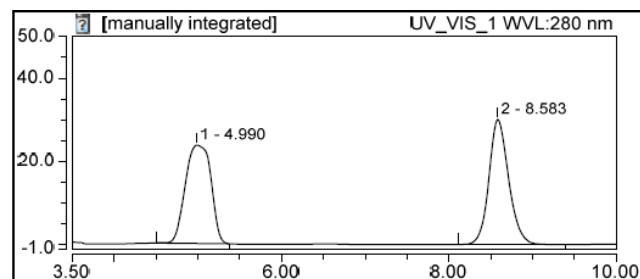

| Integration Results |                       |                 |                    |
|---------------------|-----------------------|-----------------|--------------------|
| No.                 | Retention Time<br>min | Area<br>mAU*min | Relative Area<br>% |
| 1                   | 4.990                 | 8.353           | 50.48              |
| 2                   | 8.583                 | 8.195           | 49.52              |
| Total:              |                       | 16.548          | 100.00             |

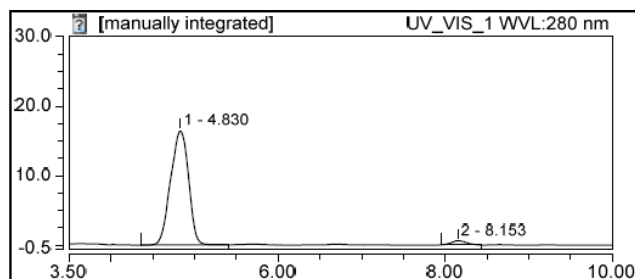

| Integration Results |                       |                 |                    |
|---------------------|-----------------------|-----------------|--------------------|
| No.                 | Retention Time<br>min | Area<br>mAU*min | Relative Area<br>% |
| 1                   | 4.830                 | 4.074           | 97.15              |
| 2                   | 8.153                 | 0.120           | 2.85               |
| Total:              |                       | 4.193           | 100.00             |

## 5. Mechanistic Investigation

### 5.1 Study of the Reaction of Alkenyl Triflate with Alkene

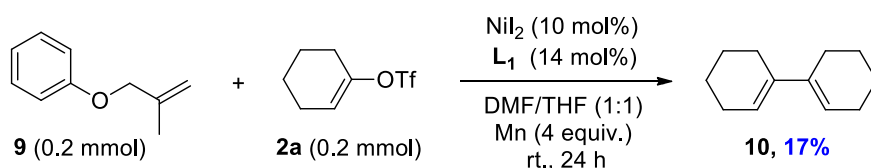

The procedure was conducted in an argon-filled glove box. To a reaction tube equipped with a magnetic stir bar was charged with  $\text{NiI}_2$  (6.3 mg, 0.020 mmol), **L1** (7.6 mg, 0.028 mmol), Mn (44.0 mg, 0.8 mmol), and DMF/THF (0.5 mL/0.5 mL). The reaction mixture was stirred for 5 min. Substrates **9** (29.6 mg, 0.2 mmol) and **2a** (46 mg, 0.2 mmol) were then added. The reaction tube was sealed with a rubber septum, and removed from the glove box. The reaction mixture was stirred at 25 °C for 24 h. The reaction mixture was diluted with ethyl acetate (10 mL), washed with water, brine, and dried over anhydrous  $\text{Na}_2\text{SO}_4$ . A 0.2 mL of solution was collected, diluted with ethyl acetate (2 mL), and analyzed by GC.

The reaction afforded alkenyl dimer **10** with 17% yield and trace of protonated product alkenyl-H. No cross product was observed, and substrate **9** remained intact.

### 5.2 The reactivity of alkene tethered Ar-I and alkenyl-OTf towards Ni(0)

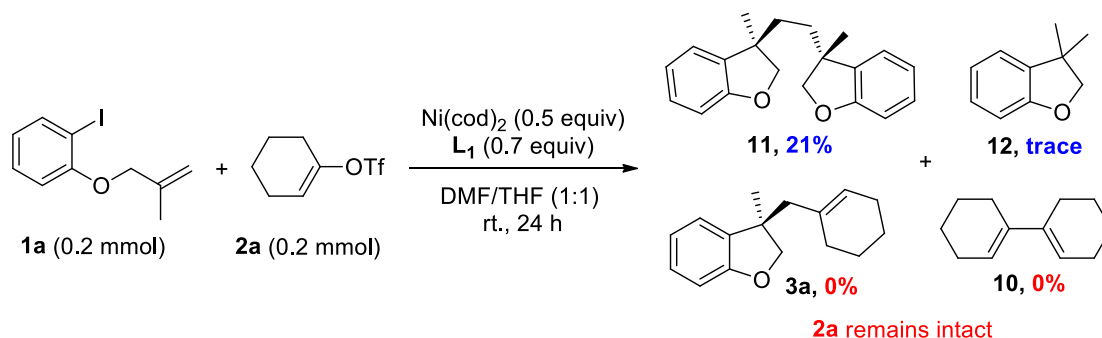

The procedure was conducted in an argon-filled glove box. To a reaction tube equipped with a magnetic stir bar was charged with  $\text{Ni}(\text{cod})_2$  (27.4 mg, 0.10 mmol), **L1** (38.2 mg, 0.14 mmol), and DMF/THF (0.5 mL/0.5 mL). The reaction mixture was stirred for 5 min. Substrates **1a** (54.8 mg, 0.2 mmol) and **2a** (46 mg, 0.2 mmol) were then added. The reaction tube was sealed with a rubber septum, and removed from the glove box. The reaction mixture was stirred at 25 °C for 24 h. The reaction mixture was diluted with ethyl acetate (10 mL), washed with water, brine, and dried over anhydrous  $\text{Na}_2\text{SO}_4$ . A 0.2 mL of solution was collected, diluted with ethyl acetate (2 mL), and

analyzed by GC.

The reaction afforded dimer **11** with 21% yield, and trace of protonated product **12**. Alkenyl triflate **2a** remained intact.

### 1,2-Bis((R)-3-methyl-2,3-dihydrobenzofuran-3-yl)ethane (**11**, known<sup>39</sup>)

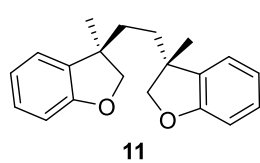

<sup>1</sup>H NMR (400 MHz, CDCl<sub>3</sub>): δ 7.15-7.09 (m, 4 H), 6.86 (t, *J* = 8.0 Hz, 2 H), 6.75 (d, *J* = 8.0 Hz, 2 H), 4.59 (d, *J* = 8.0 Hz, 2 H), 4.05 (d, *J* = 8.0 Hz, 2 H), 1.84 (s, 4 H), 1.35 (s, 6 H).

<sup>13</sup>C NMR (100 MHz, CDCl<sub>3</sub>): δ 159.5, 135.4, 128.0, 126.5, 120.1, 109.6, 82.2, 46.8, 39.2, 25.0.

### 5.3 Enantioselectivity of the Formation of Cross-product **3x** and Protonated Byproduct **13**

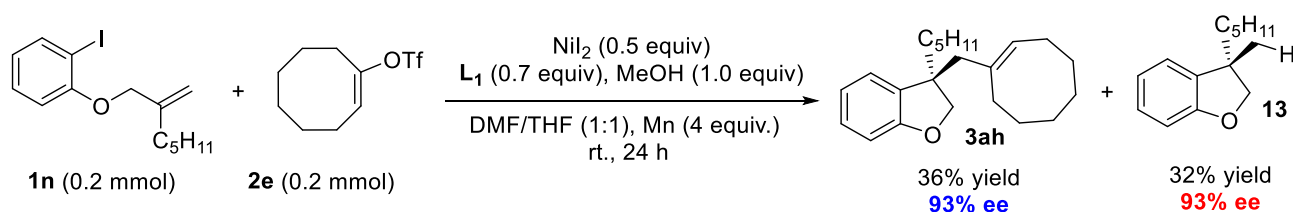

The procedure was conducted in an argon-filled glove box. To a reaction tube equipped with a magnetic stir bar was charged with NiI<sub>2</sub> (31.5 mg, 0.10 mmol), **L1** (38.2 mg, 0.14 mmol), Mn (44.0 mg, 4.0 equiv.), and DMF/THF (0.5 mL/0.5 mL). The reaction mixture was stirred for 5 min. Substrates **1n** (66.0 mg, 0.2 mmol), **2e** (51.6 mg, 0.2 mmol) and MeOH (6.4 mg, 0.2 mmol) were then added. The reaction tube was sealed with a rubber septum, and removed from the glove box. The reaction mixture was stirred at 25 °C for 24 h. The reaction mixture was diluted with ethyl acetate (10 mL), washed with water, brine, dried over anhydrous Na<sub>2</sub>SO<sub>4</sub>, and concentrated under reduced pressure. The residue was purified by flash chromatography on silica gel to afford **3ah** (22.4 mg, 36% yield, 93% ee) and **13** (13.9 mg, 32% yield, 93% ee).

### (S)-3-methyl-3-pentyl-2,3-dihydrobenzofuran (**13**, known)

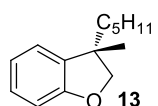

13.9 mg, 32% yield, 93% ee, colorless oil. The <sup>1</sup>H NMR and <sup>13</sup>C NMR are consistent with that reported in ref.7.

**Chiral HPLC:** CHIRALPAK IB, 25 °C, *i*PrOH-hexanes 0.2/99.8, 0.75 mL/min, 280 nm, *t*<sub>R</sub>(major)= 7.6 min, *t*<sub>R</sub>(minor)= 8.3 min.

[α]<sub>D</sub><sup>22</sup> = +2 (c = 0.5, CH<sub>2</sub>Cl<sub>2</sub>).

<sup>1</sup>H NMR (400 MHz, CDCl<sub>3</sub>): δ 7.14-7.10 (m, 1 H), 7.08-7.06 (m, 1 H), 6.87 (dt, *J* = 0.8, 7.2 Hz, 1



H), 6.78 (d,  $J = 8.0$  Hz, 1 H), 4.35 (d,  $J = 8.4$  Hz, 1 H), 4.15 (d,  $J = 8.4$  Hz, 1 H), 1.62-1.20 (m, 8 H), 1.33 (s, 3 H), 0.85 (t,  $J = 7.2$  Hz, 3 H).

**$^{13}\text{C}$  NMR (100 MHz,  $\text{CDCl}_3$ ):**  $\delta$  159.5, 135.5, 127.9, 122.8, 120.4, 109.5, 82.5, 45.2, 40.9, 32.3, 25.6, 24.3, 22.5, 14.0.

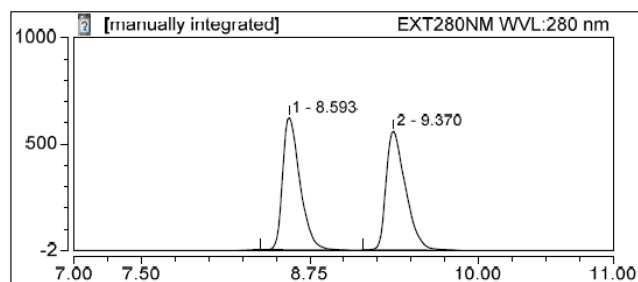

| Integration Results |                       |                 |                    |
|---------------------|-----------------------|-----------------|--------------------|
| No.                 | Retention Time<br>min | Area<br>mAU*min | Relative Area<br>% |
| 1                   | 8.593                 | 92.645          | 49.82              |
| 2                   | 9.370                 | 93.310          | 50.18              |
| Total:              |                       | 185.955         | 100.00             |

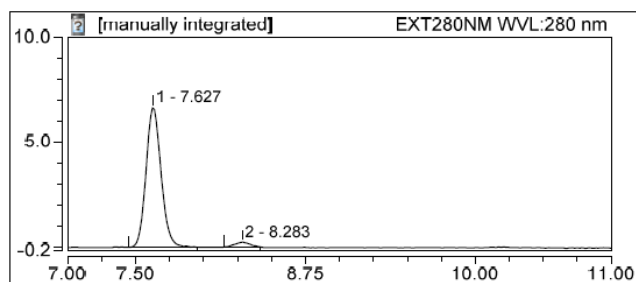

| Integration Results |                       |                 |                    |
|---------------------|-----------------------|-----------------|--------------------|
| No.                 | Retention Time<br>min | Area<br>mAU*min | Relative Area<br>% |
| 1                   | 7.627                 | 0.865           | 96.64              |
| 2                   | 8.283                 | 0.030           | 3.36               |
| Total:              |                       | 0.895           | 100.00             |

## 6. Crystallographic Data for Compound 3z (CCDC 1890459)

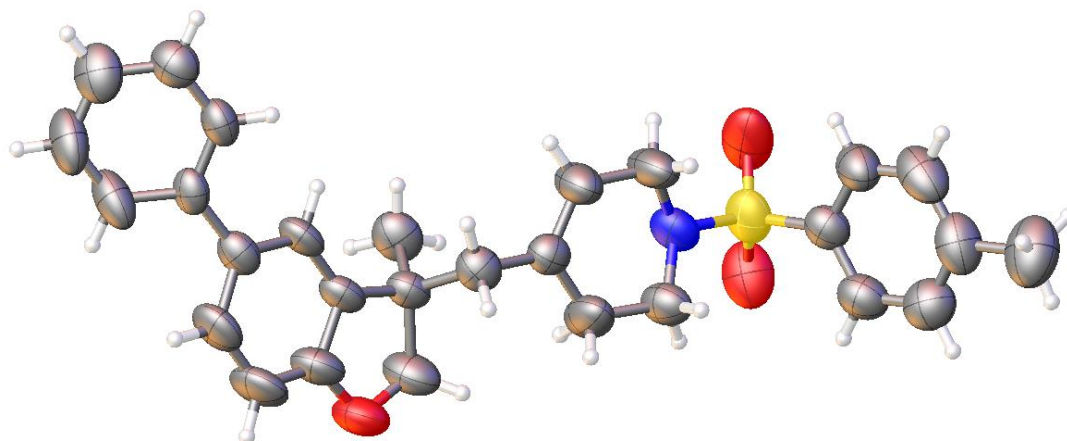

tianzhx\_1015

**Table 1** Crystal data and structure refinement for tianzhx\_1015.

|                                  |                                                   |
|----------------------------------|---------------------------------------------------|
| Identification code              | tianzhx_1015                                      |
| Empirical formula                | C <sub>28</sub> H <sub>29</sub> NO <sub>3</sub> S |
| Formula weight                   | 460.59                                            |
| Temperature/K                    | 295.6(2)                                          |
| Crystal system                   | orthorhombic                                      |
| Space group                      | P2 <sub>1</sub> 2 <sub>1</sub> 2 <sub>1</sub>     |
| a/Å                              | 8.5255(6)                                         |
| b/Å                              | 10.9187(9)                                        |
| c/Å                              | 26.122(3)                                         |
| $\alpha$ /°                      | 90.00                                             |
| $\beta$ /°                       | 90.00                                             |
| $\gamma$ /°                      | 90.00                                             |
| Volume/Å <sup>3</sup>            | 2431.7(4)                                         |
| Z                                | 4                                                 |
| $\rho_{\text{calc}}/\text{cm}^3$ | 1.258                                             |
| $\mu/\text{mm}^{-1}$             | 1.413                                             |
| F(000)                           | 980.0                                             |
| Crystal size/mm <sup>3</sup>     | 0.21 × 0.15 × 0.14                                |
| Radiation                        | CuK $\alpha$ ( $\lambda$ = 1.54184)               |

2 $\theta$  range for data collection/ $^{\circ}$  8.78 to 133.18

Index ranges  $-6 \leq h \leq 10$ ,  $-12 \leq k \leq 12$ ,  $-31 \leq l \leq 29$

Reflections collected 7508

Independent reflections 4101 [ $R_{\text{int}} = 0.0426$ ,  $R_{\text{sigma}} = 0.0706$ ]

Data/restraints/parameters 4101/0/300

Goodness-of-fit on  $F^2$  1.121

Final R indexes [ $I \geq 2\sigma(I)$ ]  $R_1 = 0.0730$ ,  $wR_2 = 0.1894$

Final R indexes [all data]  $R_1 = 0.1101$ ,  $wR_2 = 0.2606$

Largest diff. peak/hole /  $e \text{ \AA}^{-3}$  0.22/-0.57

Flack parameter -0.07(5)

**Table 2 Fractional Atomic Coordinates ( $\times 10^4$ ) and Equivalent Isotropic Displacement Parameters ( $\text{\AA}^2 \times 10^3$ ) for tianzhx\_1015.  $U_{\text{eq}}$  is defined as 1/3 of of the trace of the orthogonalised  $U_{\text{ij}}$  tensor.**

| Atom | $x$         | $y$         | $z$        | $U(\text{eq})$ |
|------|-------------|-------------|------------|----------------|
| S1   | -7953.1(18) | -5233.5(19) | -1431.7(7) | 83.3(5)        |
| O1   | -16535(6)   | -5867(5)    | -2890(2)   | 93.8(16)       |
| O2   | -6624(5)    | -4766(8)    | -1707(2)   | 124(2)         |
| O3   | -8104(7)    | -6521(5)    | -1341(2)   | 104.8(18)      |
| N1   | -9511(5)    | -4815(5)    | -1751(2)   | 74.0(14)       |
| C1   | -15865(6)   | -1118(5)    | -4366(2)   | 64.1(14)       |
| C2   | -15793(7)   | -320(6)     | -4773(3)   | 76.9(17)       |
| C3   | -16732(9)   | -510(7)     | -5196(3)   | 92(2)          |
| C4   | -17749(10)  | -1480(7)    | -5193(3)   | 100(3)         |
| C5   | -17808(8)   | -2271(6)    | -4788(3)   | 90(2)          |
| C6   | -16866(6)   | -2107(5)    | -4358(2)   | 57.5(12)       |
| C7   | -16885(6)   | -3006(5)    | -3934(2)   | 61.7(13)       |
| C8   | -18210(6)   | -3694(6)    | -3825(3)   | 83(2)          |
| C9   | -18188(7)   | -4643(7)    | -3454(3)   | 96(2)          |
| C10  | -16782(7)   | -4917(6)    | -3234(3)   | 78.0(18)       |

|     |           |          |          |          |
|-----|-----------|----------|----------|----------|
| C11 | -15439(6) | -4256(5) | -3319(2) | 60.5(14) |
| C12 | -15497(5) | -3300(5) | -3677(2) | 62.1(14) |
| C13 | -14100(6) | -4756(5) | -3016(2) | 60.2(13) |
| C14 | -14910(8) | -5917(6) | -2782(3) | 90(2)    |
| C15 | -12688(7) | -5088(6) | -3341(3) | 80.5(18) |
| C16 | -13666(7) | -3817(5) | -2590(2) | 67.4(15) |
| C17 | -12237(7) | -4108(5) | -2283(2) | 60.4(13) |
| C18 | -10875(8) | -3444(6) | -2329(3) | 85(2)    |
| C19 | -9535(8)  | -3563(7) | -1979(3) | 97(3)    |
| C20 | -11012(7) | -5163(6) | -1526(3) | 78.9(18) |
| C21 | -12284(8) | -5084(9) | -1905(3) | 100(3)   |
| C22 | -7990(7)  | -4483(5) | -846(2)  | 67.2(15) |
| C23 | -7293(8)  | -3357(6) | -784(3)  | 83.2(19) |
| C24 | -7248(10) | -2772(6) | -318(4)  | 99(3)    |
| C25 | -7870(10) | -3356(7) | 108(3)   | 93(2)    |
| C26 | -8583(9)  | -4458(7) | 65(3)    | 90(2)    |
| C27 | -8636(7)  | -5048(6) | -417(3)  | 79.9(18) |
| C28 | -7765(14) | -2741(8) | 635(4)   | 131(4)   |

**Table 3 Anisotropic Displacement Parameters ( $\text{\AA}^2 \times 10^3$ ) for tianzhx\_1015. The Anisotropic displacement factor exponent takes the form:  $-2\pi^2[h^2a^{*2}U_{11}+2hka^*b^*U_{12}+\dots]$ .**

| Atom | $U_{11}$ | $U_{22}$  | $U_{33}$ | $U_{23}$ | $U_{13}$ | $U_{12}$ |
|------|----------|-----------|----------|----------|----------|----------|
| S1   | 51.2(7)  | 111.1(13) | 87.7(11) | -5.9(10) | -7.5(7)  | 15.6(8)  |
| O1   | 68(3)    | 88(3)     | 125(4)   | 18(3)    | 5(3)     | -25(2)   |
| O2   | 47(2)    | 229(7)    | 97(4)    | -7(5)    | 6(2)     | 12(4)    |
| O3   | 101(4)   | 91(3)     | 122(4)   | -17(3)   | -26(3)   | 40(3)    |
| N1   | 45(2)    | 82(3)     | 95(4)    | 0(3)     | 2(2)     | 0(2)     |
| C1   | 50(3)    | 74(3)     | 68(3)    | -12(3)   | -13(2)   | 4(2)     |

|     |         |        |        |        |        |        |
|-----|---------|--------|--------|--------|--------|--------|
| C2  | 63(3)   | 72(4)  | 96(5)  | 1(4)   | -6(3)  | 6(3)   |
| C3  | 89(5)   | 85(4)  | 103(5) | -2(4)  | -23(4) | 27(4)  |
| C4  | 106(6)  | 95(5)  | 101(6) | -12(4) | -55(5) | 19(4)  |
| C5  | 78(4)   | 74(4)  | 118(6) | -16(4) | -45(4) | 6(3)   |
| C6  | 41(2)   | 71(3)  | 61(3)  | -8(3)  | -10(2) | 13(2)  |
| C7  | 41(2)   | 66(3)  | 79(4)  | -9(3)  | -3(2)  | 4(2)   |
| C8  | 37(3)   | 94(4)  | 118(6) | -4(4)  | -13(3) | -5(3)  |
| C9  | 42(3)   | 105(5) | 141(7) | 18(5)  | 1(3)   | -22(3) |
| C10 | 51(3)   | 72(4)  | 111(5) | 7(4)   | 9(3)   | -14(3) |
| C11 | 36(2)   | 62(3)  | 83(4)  | -5(3)  | 6(2)   | -7(2)  |
| C12 | 32(2)   | 65(3)  | 89(4)  | -7(3)  | -2(2)  | -8(2)  |
| C13 | 47(2)   | 62(3)  | 72(3)  | -1(3)  | 4(2)   | -7(2)  |
| C14 | 68(4)   | 66(4)  | 134(7) | 13(4)  | -2(4)  | -11(3) |
| C15 | 58(3)   | 88(4)  | 95(5)  | -10(4) | 5(3)   | 12(3)  |
| C16 | 58(3)   | 68(3)  | 77(4)  | -5(3)  | 2(3)   | 8(2)   |
| C17 | 58(3)   | 59(3)  | 64(3)  | -3(3)  | 4(3)   | 1(2)   |
| C18 | 72(4)   | 81(4)  | 102(5) | 24(4)  | -17(4) | -21(3) |
| C19 | 67(4)   | 105(5) | 120(6) | 42(5)  | -20(4) | -30(4) |
| C20 | 53(3)   | 82(4)  | 102(5) | 18(4)  | -2(3)  | -2(3)  |
| C21 | 55(3)   | 148(7) | 97(5)  | 38(5)  | -5(3)  | -20(4) |
| C22 | 50(3)   | 70(3)  | 81(4)  | -1(3)  | -1(3)  | 4(3)   |
| C23 | 83(4)   | 79(4)  | 88(5)  | 12(4)  | -21(4) | -10(3) |
| C24 | 97(5)   | 64(4)  | 138(7) | 2(4)   | -38(5) | 2(4)   |
| C25 | 95(5)   | 81(5)  | 101(5) | -21(4) | -23(5) | 23(4)  |
| C26 | 84(4)   | 87(5)  | 99(5)  | 10(4)  | -1(4)  | 13(4)  |
| C27 | 63(3)   | 75(4)  | 102(5) | 3(4)   | 0(3)   | -1(3)  |
| C28 | 162(10) | 113(7) | 118(7) | 4(6)   | -35(7) | 32(7)  |

**Table 4 Bond Lengths for tianzhx\_1015.**

| Atom | Atom | Length/Å  | Atom | Atom | Length/Å  |
|------|------|-----------|------|------|-----------|
| S1   | O2   | 1.436(6)  | C10  | C11  | 1.371(7)  |
| S1   | O3   | 1.431(6)  | C11  | C12  | 1.401(8)  |
| S1   | N1   | 1.633(5)  | C11  | C13  | 1.494(8)  |
| S1   | C22  | 1.735(6)  | C13  | C14  | 1.566(8)  |
| O1   | C10  | 1.390(8)  | C13  | C15  | 1.516(7)  |
| O1   | C14  | 1.415(8)  | C13  | C16  | 1.557(8)  |
| N1   | C19  | 1.492(8)  | C16  | C17  | 1.493(8)  |
| N1   | C20  | 1.458(7)  | C17  | C18  | 1.374(8)  |
| C1   | C2   | 1.376(9)  | C17  | C21  | 1.452(9)  |
| C1   | C6   | 1.377(8)  | C18  | C19  | 1.468(9)  |
| C2   | C3   | 1.381(10) | C20  | C21  | 1.471(9)  |
| C3   | C4   | 1.369(11) | C22  | C23  | 1.376(9)  |
| C4   | C5   | 1.367(11) | C22  | C27  | 1.394(9)  |
| C5   | C6   | 1.392(8)  | C23  | C24  | 1.376(10) |
| C6   | C7   | 1.480(8)  | C24  | C25  | 1.389(12) |
| C7   | C8   | 1.386(8)  | C25  | C26  | 1.353(10) |
| C7   | C12  | 1.398(7)  | C25  | C28  | 1.533(11) |
| C8   | C9   | 1.421(10) | C26  | C27  | 1.415(10) |
| C9   | C10  | 1.362(9)  |      |      |           |

**Table 5 Bond Angles for tianzhx\_1015.**

| Atom | Atom | Atom | Angle/°  | Atom | Atom | Atom | Angle/°  |
|------|------|------|----------|------|------|------|----------|
| O2   | S1   | N1   | 106.7(3) | C12  | C11  | C13  | 130.8(4) |
| O2   | S1   | C22  | 106.7(4) | C7   | C12  | C11  | 121.4(5) |
| O3   | S1   | O2   | 120.2(4) | C11  | C13  | C14  | 99.5(5)  |
| O3   | S1   | N1   | 106.6(3) | C11  | C13  | C15  | 113.4(5) |

|     |     |     |          |     |     |     |          |
|-----|-----|-----|----------|-----|-----|-----|----------|
| O3  | S1  | C22 | 108.5(3) | C11 | C13 | C16 | 108.7(5) |
| N1  | S1  | C22 | 107.6(3) | C15 | C13 | C14 | 112.0(5) |
| C10 | O1  | C14 | 107.8(5) | C15 | C13 | C16 | 111.7(5) |
| C19 | N1  | S1  | 118.2(4) | C16 | C13 | C14 | 111.0(5) |
| C20 | N1  | S1  | 115.8(5) | O1  | C14 | C13 | 108.9(6) |
| C20 | N1  | C19 | 112.8(5) | C17 | C16 | C13 | 115.9(5) |
| C2  | C1  | C6  | 122.5(5) | C18 | C17 | C16 | 122.0(6) |
| C1  | C2  | C3  | 119.8(7) | C18 | C17 | C21 | 118.1(6) |
| C4  | C3  | C2  | 118.6(8) | C21 | C17 | C16 | 119.9(5) |
| C5  | C4  | C3  | 121.1(7) | C17 | C18 | C19 | 123.8(6) |
| C4  | C5  | C6  | 121.4(6) | C18 | C19 | N1  | 109.9(5) |
| C1  | C6  | C5  | 116.5(6) | N1  | C20 | C21 | 111.2(6) |
| C1  | C6  | C7  | 122.6(5) | C17 | C21 | C20 | 118.6(6) |
| C5  | C6  | C7  | 120.8(6) | C23 | C22 | S1  | 121.2(5) |
| C8  | C7  | C6  | 121.4(5) | C23 | C22 | C27 | 118.2(6) |
| C8  | C7  | C12 | 117.8(6) | C27 | C22 | S1  | 120.5(5) |
| C12 | C7  | C6  | 120.2(5) | C24 | C23 | C22 | 122.1(7) |
| C7  | C8  | C9  | 121.7(6) | C23 | C24 | C25 | 119.1(7) |
| C10 | C9  | C8  | 117.3(5) | C24 | C25 | C28 | 119.7(8) |
| C9  | C10 | O1  | 124.7(5) | C26 | C25 | C24 | 120.9(8) |
| C9  | C10 | C11 | 123.5(7) | C26 | C25 | C28 | 119.4(9) |
| C11 | C10 | O1  | 111.8(6) | C25 | C26 | C27 | 119.6(8) |
| C10 | C11 | C12 | 118.1(5) | C22 | C27 | C26 | 120.1(6) |
| C10 | C11 | C13 | 111.1(5) |     |     |     |          |

**Table 6 Torsion Angles for tianzhx\_1015.**

| A  | B  | C   | D   | Angle/°  | A   | B  | C   | D   | Angle/° |
|----|----|-----|-----|----------|-----|----|-----|-----|---------|
| S1 | N1 | C19 | C18 | 169.1(6) | C10 | O1 | C14 | C13 | 9.7(8)  |

|              |           |              |           |
|--------------|-----------|--------------|-----------|
| S1 N1 C20C21 | -162.9(6) | C10C11C12C7  | 1.2(9)    |
| S1 C22C23C24 | -177.1(6) | C10C11C13C14 | 5.4(7)    |
| S1 C22C27C26 | 176.5(5)  | C10C11C13C15 | 124.5(6)  |
| O1C10C11C12  | 177.2(5)  | C10C11C13C16 | -110.8(6) |
| O1C10C11C13  | 0.1(8)    | C11C13C14O1  | -9.1(8)   |
| O2S1 N1 C19  | -39.6(7)  | C11C13C16C17 | -173.8(5) |
| O2S1 N1 C20  | -178.0(6) | C12C7 C8 C9  | 2.0(10)   |
| O2S1 C22C23  | 23.9(6)   | C12C11C13C14 | -171.3(6) |
| O2S1 C22C27  | -151.6(5) | C12C11C13C15 | -52.2(9)  |
| O3S1 N1 C19  | -169.2(6) | C12C11C13C16 | 72.6(8)   |
| O3S1 N1 C20  | 52.4(6)   | C13C11C12C7  | 177.7(6)  |
| O3S1 C22C23  | 154.7(5)  | C13C16C17C18 | 109.4(7)  |
| O3S1 C22C27  | -20.9(6)  | C13C16C17C21 | -73.5(8)  |
| N1S1 C22C23  | -90.3(6)  | C14O1 C10C9  | 175.3(8)  |
| N1S1 C22C27  | 94.2(5)   | C14O1 C10C11 | -6.3(9)   |
| N1C20C21C17  | -36.0(10) | C14C13C16C17 | 77.8(6)   |
| C1C2 C3 C4   | 1.7(11)   | C15C13C14O1  | -129.2(6) |
| C1C6 C7 C8   | 155.2(6)  | C15C13C16C17 | -48.0(7)  |
| C1C6 C7 C12  | -33.5(8)  | C16C13C14O1  | 105.3(7)  |
| C2C1 C6 C5   | 0.5(9)    | C16C17C18C19 | 169.6(7)  |
| C2C1 C6 C7   | 176.6(5)  | C16C17C21C20 | -165.6(6) |
| C2C3 C4 C5   | -2.0(12)  | C17C18C19N1  | 27.0(11)  |
| C3C4 C5 C6   | 1.5(12)   | C18C17C21C20 | 11.7(11)  |
| C4C5 C6 C1   | -0.7(10)  | C19N1 C20C21 | 56.6(9)   |
| C4C5 C6 C7   | -176.9(6) | C20N1 C19C18 | -51.3(9)  |
| C5C6 C7 C8   | -28.8(9)  | C21C17C18C19 | -7.6(12)  |
| C5C6 C7 C12  | 142.5(6)  | C22S1 N1 C19 | 74.6(6)   |
| C6C1 C2 C3   | -1.0(9)   | C22S1 N1 C20 | -63.8(6)  |
| C6C7 C8 C9   | 173.5(6)  | C22C23C24C25 | 2.7(12)   |



|                |           |                 |           |
|----------------|-----------|-----------------|-----------|
| C6 C7 C12 C11  | -171.8(5) | C23 C22 C27 C26 | 0.8(10)   |
| C7 C8 C9 C10   | -4.9(12)  | C23 C24 C25 C26 | -3.3(12)  |
| C8 C7 C12 C11  | -0.2(9)   | C23 C24 C25 C28 | 177.3(7)  |
| C8 C9 C10 O1   | -175.7(7) | C24 C25 C26 C27 | 2.7(11)   |
| C8 C9 C10 C11  | 6.1(12)   | C25 C26 C27 C22 | -1.5(10)  |
| C9 C10 C11 C12 | -4.4(11)  | C27 C22 C23 C24 | -1.4(10)  |
| C9 C10 C11 C13 | 178.5(7)  | C28 C25 C26 C27 | -177.9(7) |

**Table 7 Hydrogen Atom Coordinates ( $\text{\AA} \times 10^4$ ) and Isotropic Displacement Parameters ( $\text{\AA}^2 \times 10^3$ ) for tianzhx\_1015.**

| Atom | <i>x</i> | <i>y</i> | <i>z</i> | U(eq) |
|------|----------|----------|----------|-------|
| H1   | -15214   | -985     | -4086    | 77    |
| H2   | -15113   | 346      | -4763    | 92    |
| H3   | -16676   | 11       | -5477    | 111   |
| H4   | -18411   | -1603    | -5471    | 121   |
| H5   | -18493   | -2934    | -4800    | 108   |
| H8   | -19136   | -3530    | -4000    | 99    |
| H9   | -19098   | -5061    | -3364    | 115   |
| H12  | -14593   | -2852    | -3744    | 74    |
| H14A | -14459   | -6652    | -2930    | 107   |
| H14B | -14743   | -5939    | -2415    | 107   |
| H15A | -13018   | -5592    | -3622    | 121   |
| H15B | -11943   | -5529    | -3136    | 121   |
| H15C | -12211   | -4354    | -3469    | 121   |
| H16A | -13519   | -3023    | -2748    | 81    |
| H16B | -14549   | -3749    | -2357    | 81    |
| H18  | -10797   | -2887    | -2597    | 102   |
| H19A | -9615    | -2956    | -1709    | 117   |

|      |        |       |       |     |
|------|--------|-------|-------|-----|
| H19B | -8567  | -3418 | -2165 | 117 |
| H20A | -11245 | -4627 | -1240 | 95  |
| H20B | -10945 | -5994 | -1397 | 95  |
| H21A | -12318 | -5856 | -2089 | 120 |
| H21B | -13265 | -5010 | -1719 | 120 |
| H23  | -6836  | -2979 | -1067 | 100 |
| H24  | -6808  | -1996 | -289  | 119 |
| H26  | -9035  | -4825 | 351   | 108 |
| H27  | -9104  | -5815 | -447  | 96  |
| H28A | -8182  | -3282 | 891   | 197 |
| H28B | -8359  | -1994 | 632   | 197 |
| H28C | -6689  | -2562 | 712   | 197 |

## 7. References

- (1) Armarego, W. L. F.; Chai, C. C. L. *Purification of laboratory chemicals*, 5th ed., Butterworth-Heinemann, **2003**.
- (2) Gao, Y.; Xiong, W.-F.; Chen, H.-J.; Wu, W.-Q.; Peng, J.-W.; Gao, Y.-L.; Jiang, H.-F. Pd-Catalyzed Highly Regio- and Stereoselective Formation of C–C Double Bonds: An Efficient Method for the Synthesis of Benzofuran-, Dihydrobenzofuran-, and Indoline-Containing Alkenes. *J. Org. Chem.* **2015**, *80*, 7456.
- (3) Ramesh, K.; Basuli, S.; Satyanarayana, G. Microwave-Assisted Domino Palladium Catalysis in Water: A Diverse Synthesis of 3, 3'-Disubstituted Heterocyclic Compounds. *Eur. J. Org. Chem.* **2018**, 2171.
- (4) Yao, T.-L.; He, D. Palladium-Catalyzed Domino Heck/Aryne Carbopalladation/C–H Functionalization: Synthesis of Heterocycle-Fused 9, 10-Dihydrophenanthrenes. *Org. Lett.* **2017**, *19*, 842.
- (5) Wu, X.-X.; Chen, W.-L.; Shen, Y.; Chen, S.; Xu, P.-F.; Liang, Y.-M. M. Palladium-Catalyzed Domino Heck/Intermolecular C–H Bond Functionalization: Efficient Synthesis of Alkylated Polyfluoroarene Derivatives. *Org. Lett.* **2016**, *18*, 1784.
- (6) Hu, M.; Gao, Y.; Wu, W. Q.; Li, J. X.; Li, C. S.; Zhang, H.; Jiang, H. F. Efficient assembly of ynones via palladium-catalyzed sequential carbonylation/alkynylation. *Org. Biomol. Chem.*, **2018**, *16*, 7383.
- (7) Zhang, Z.-M.; Xu, B.; Qian, Y.-Y.; Wu, L.-Z.; Wu, Y.-Q.; Zhou, L.-J.; Liu Y.; Zhang, J.-L. Palladium-Catalyzed Enantioselective Reductive Heck Reactions: Convenient Access to 3,3-Disubstituted 2,3-Dihydrobenzofuran. *Angew. Chem. Int. Ed.* **2018**, *57*, 10373.
- (8) Thapa, S.; Basnet, P.; Giri, R. Copper-Catalyzed Dicarbofunctionalization of Unactivated Olefins by Tandem Cyclization/Cross-Coupling. *J. Am. Chem. Soc.* **2017**, *139*, 5700.
- (9) Jaimes, M. C. B.; Weingand, V.; Rominger, F.; Hashmi, A. S. K. From Ynamides to Highly Substituted Benzo[b]furans: Gold(I)-Catalyzed 5-endo-dig-Cyclization/Rearrangement of Alkyl Oxonium Intermediates. *Chem. Eur. J.* **2013**, *19*, 12504.
- (10) Rueping, M.; Leiendecker, M.; Das, A.; Poissona, T.; Bui, L. Potassium tert-butoxide mediated Heck-type cyclization/isomerization–benzofurans from organocatalytic radical cross-coupling reactions. *Chem. Commun.* **2011**, *47*, 10629.
- (11) Revol, G.; McCallum, T.; Morin, M.; Gagosz, F.; Barriault, L. Photoredox Transformations with Dimeric Gold Complexes. *Angew. Chem. Int. Ed.* **2013**, *52*, 13342.
- (12) Lockner, J. W.; Dixon, D. D.; Risgaard, R.; Baran, P. S. Practical Radical Cyclizations with Arylboronic Acids and Trifluoroborates. *Org. Lett.* **2011**, *13*, 5628.
- (13) Zheng, H.-J.; Zhu, Y.-G.; Shi, Y. Palladium(0)-Catalyzed Heck Reaction/C–H Activation/Amination Sequence with Diaziridinone: A Facile Approach to Indoline. *Angew. Chem. Int. Ed.* **2014**, *53*, 11280.
- (14) (a) Solé D.; Mariani, F.; Fernández, I.; Sierra, M. A. Intramolecular Pd(0)-Catalyzed Reactions of (2-Iodoanilino)-aldehydes: A Joint Experimental–Computational Study. *J. Org. Chem.* **2012**, *77*, 10272. (b) Hérouin, J.; Schneider, C.; Gillaizeau, I.; Hoarau, C. Palladium-Catalyzed Domino Allenamide Carbopalladation/Direct C–H Allylation of Heteroarenes: Synthesis of Primprinine and Papaverine Analogues.

- (15) Iain, D. G. W.; Stefanie, R.; Toste, F. D. Asymmetric Synthesis of Medium-Sized Rings by Intramolecular Au(I)-Catalyzed Cyclopropanation. *J. Am. Chem. Soc.* **2009**, *131*, 2056.
- (16) Mariusz, J. B. A Convenient Synthesis of 2-Arylbenzo[b]furans from Aryl Halides and 2-Halophenols by Catalytic One-Pot Cascade Method. *ACS Catal.* **2016**, *6*, 2429.
- (17) Stephen, G. N.; Jennifer, K. H.; Norman, N.; Mark, L. Palladium-Catalyzed Carbohalogenation: Bromide to Iodide Exchange and Domino Processes. *J. Am. Chem. Soc.* **2011**, *133*, 14916.
- (18) Luo, Z.-S.; Mohamed, N. A synthetic approach for (*S*)-(3-benzyl-3-methyl-2,3-dihydro-benzofuran-6-yl)-piperidin-1-yl-methanone, a Selective CB2 Receptor Agonist. *Tetrahedron Letters*. **2012**, *53*, 3316.
- (19) Croft, A. K.; Foley, M. K. Proline-rich Proteins-deriving a Basis for Residue-based Selectivity in Polyphenolic Binding. *Org. Biomol. Chem.*, **2008**, *6*, 1594.
- (20) Alt, I. T.; Gutoff, C.; Plietker, B. Fe-catalyzed Intramolecular Aminations of C(sp<sup>3</sup>)-H-bonds of alkylarylazides. *Angew. Chem. Int. Ed.* **2015**, *54*, 10545.
- (21) Shan, X. H.; Yang, B.; Zheng, H. X.; Qu, J. P.; Kang, Y. B. Phenanthroline-tBuOK Promoted Intramolecular C-H Arylation of Indoles with ArI under Transition-Metal-Free Conditions. *Org. Lett.* **2018**, *20*, 7898.
- (22) Su, X.-L.; Huang, H.-G.; Yuan, Y.-F.; Li, Y. Radical Desulfur-Fragmentation and Reconstruction of Enol Triflates: Facile Access to  $\alpha$ -Trifluoromethyl Ketones. *Angew. Chem. Int. Ed.* **2017**, *56*, 1338.
- (23) (a) Overman, L. E.; Tanis, P. S. Origin of Stereocontrol in the Construction of the 12-Oxatricyclo[6.3.1.0<sup>2,7</sup>]dodecane Ring System by Prins Pinacol Reactions. *J. Org. Chem.*, **2010**, *75*, 455. (b) Crisp, G. T.; Scott, W. J. A Convenient One-Pot Procedure for the Conversion of Terminal Acetylenic Alcohols (and O-Derivatives) into (*E*)-Olefinic Alcohols (or Derivatives). *Synthesis*. **1985**, 335.
- (24) Dürr, A. B.; Yin, G.; Kalvet, I.; Napolya, F.; Schoenebeck, F. Nickel-catalyzed trifluoromethylthiolation of Csp<sup>2</sup>-O bonds. *Chem. Sci.* **2016**, *7*, 1076.
- (25) Lippincott, D. J.; Linstadt, R. T. H.; Maser, M. R.; Lipshutz, B. H. Synthesis of Functionalized [3], [4], [5] and [6]Dendralenes through Palladium-Catalyzed Cross-Couplings of Substituted Allenates. *Angew. Chem. Int. Ed.* **2017**, *56*, 847.
- (26) Navendu, J.; Quyen, N.; Tom, G. D. Development of a Suzuki Cross-Coupling Reaction between 2-Azidoarylboronic Pinacolate Esters and Vinyl Triflates To Enable the Synthesis of [2,3]-Fused Indole Heterocycles. *J. Org. Chem.* **2014**, *79*, 2781.
- (27) Si, T.-D.; Li, B.-W.; Xiong, W.-R.; Xu, B.; Tang, W.-J. Efficient cross-coupling of aryl/alkenyl triflates with acyclic secondary alkylboronic acids. *Org. Biomol. Chem.* **2017**, *15*, 9903.
- (28) Tsuyoshi, U.; Hideyuki, K.; Kei, M. Trichlorophenyl Formate: Highly Reactive and Easily Accessible Crystalline CO Surrogate for Palladium-Catalyzed Carbonylation of Aryl/Alkenyl Halides and Triflates. *Org. Lett.* **2012**, *14*, 5370.
- (29) Clark, J. R.; Feng, K.-B.; Sookezian, A.; White, M. C. Manganese-Catalysed Benzylic C(sp<sup>3</sup>)-H Amination for Late-stage Functionalization. *Nat. Chem.* **2018**, *10*, 583.

- (30) Jigajinni, V. B.; Wightman, R. H. Hydrogenolysis of Enol Triflates; A New Method for the Reduction of Ketones to Methylene Compounds. *Tetrahedron Letters*, **1982**, 23, 117.
- (31) Patel, H. H.; Sigman, M. S. Enantioselective Palladium-Catalyzed Alkenylation of Trisubstituted Alkenols To Form Allylic Quaternary Centers. *J. Am. Chem. Soc.* **2016**, 138, 14226.
- (32) Peter, J. S.; Thomas, E. D. Preparation of Vinyl Trifluoromethanesulfonates: 3-Methyl-2-Buten-2-yl Triflate. *Org. Synth.* **1974**, 54, 79.
- (33) Hu, J. T.; Zheng, B.; Chen, Y. C.; Xiao, Q. Expedient synthesis of 9,10-phenanthrenes via LiOPiv-promoted and palladium-catalysed aryne annulation by vinyl triflates. *Org. Chem. Front.*, **2018**, 5, 2045.
- (34) Huang, H.; Ash, J.; Kang, J. Y. Tf<sub>2</sub>O-Promoted Activating Strategy of Phosphate Analogues: Synthesis of Mixed Phosphates and Phosphinate. *Org. Lett.* **2018**, 20, 4938.
- (35) Zhang, X.-J.; Xie, X.; Liu, Y.-H. Nickel-Catalyzed Highly Regioselective Hydrocyanation of Terminal Alkynes with Zn(CN)<sub>2</sub> Using Water as the Hydrogen Source. *J. Am. Chem. Soc.* **2018**, 140, 7385.
- (36) Goh, S. S.; Baars, H.; Gockel, B.; Anderson, E. A. Metal-Catalyzed Syntheses of Abridged CDE Rings of Rubriflordilactones A and B. *Org. Lett.*, **2012**, 14, 6278.
- (37) Odrizola, A.; Oiartide, M.; Palomo, C. Enantioselective Synthesis of Quaternary  $\Delta^4$ - and  $\Delta^5$ -Dehydroprolines Based on a Two-Step Formal [3+2] Cycloaddition of  $\alpha$ -Aryl and  $\alpha$ -Alkyl Isocyano(thio)acetates with Vinyl Ketones. *Chem. Eur. J.* **2017**, 23, 12758.
- (38) Bischo, A. J.; Nelson, B. M.; Niemeyer, Z. L.; Sigman, M. S.; Movassaghi, M. Quantitative Modeling of Bis(pyridine)silver(I) Permanganate Oxidation of Hydantoin Derivatives: Guidelines for Predicting the Site of Oxidation in Complex Substrates. *J. Am. Chem. Soc.* **2017**, 139, 15539.
- (39) Wang, W.; Zhou, R.; Jiang, Z.-J.; Wang, X.; Fu, H.-Y.; Zheng, X.-L.; Chen, H.; Li, R.-X. Palladium-Catalyzed Domino Mizoroki-Heck/Intermolecular C(sp<sup>3</sup>)-H Activation Sequence: An Approach to the Formation of C(sp<sup>3</sup>)-C(sp<sup>3</sup>) Bonds. *Eur. J. Org. Chem.* **2015**, 2015, 2579.

## 8. Copies of NMR Spectra

1c-1;  $^1\text{H}$  NMR (400MHz,  $\text{CDCl}_3$ );  $^{13}\text{C}$  NMR (100MHz,  $\text{CDCl}_3$ )

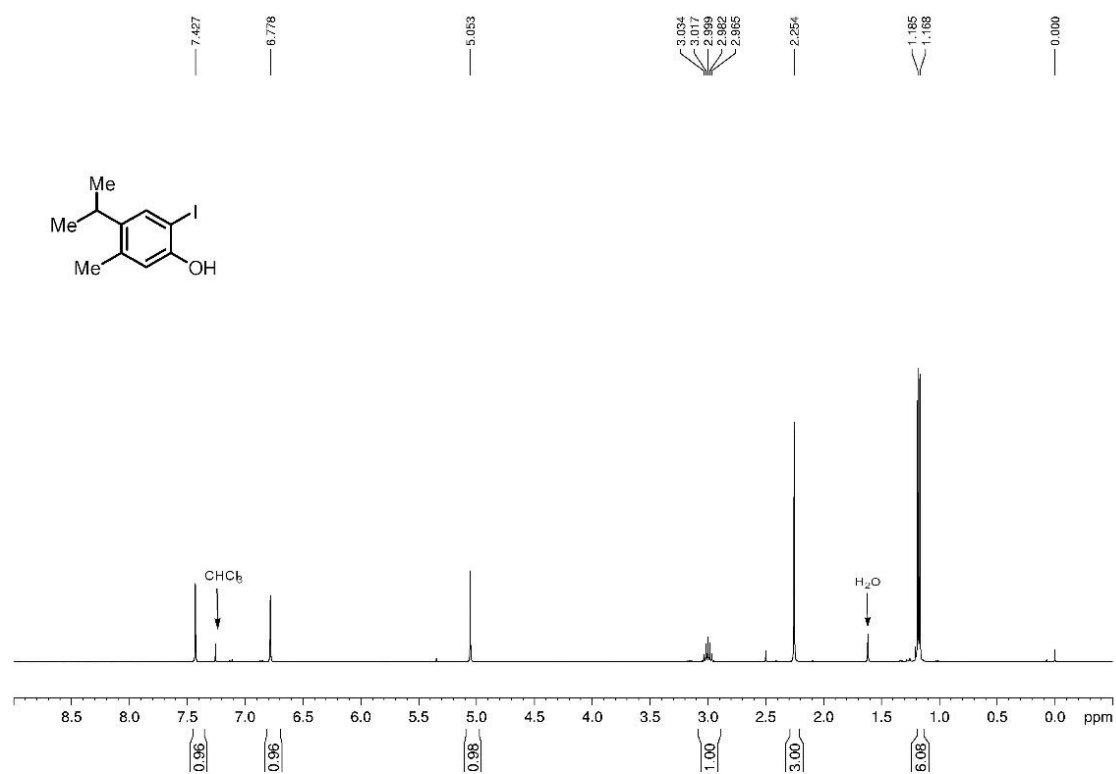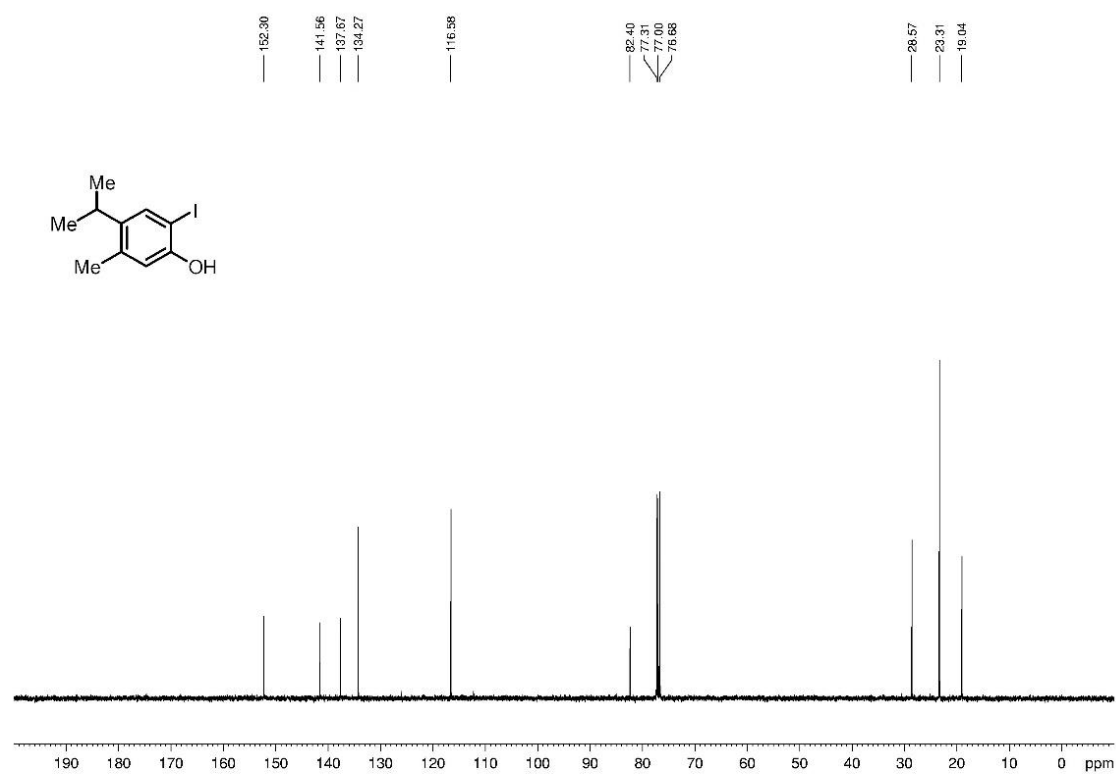

**1c;  $^1\text{H}$  NMR (400MHz,  $\text{CDCl}_3$ );  $^{13}\text{C}$  NMR (100MHz,  $\text{CDCl}_3$ )**

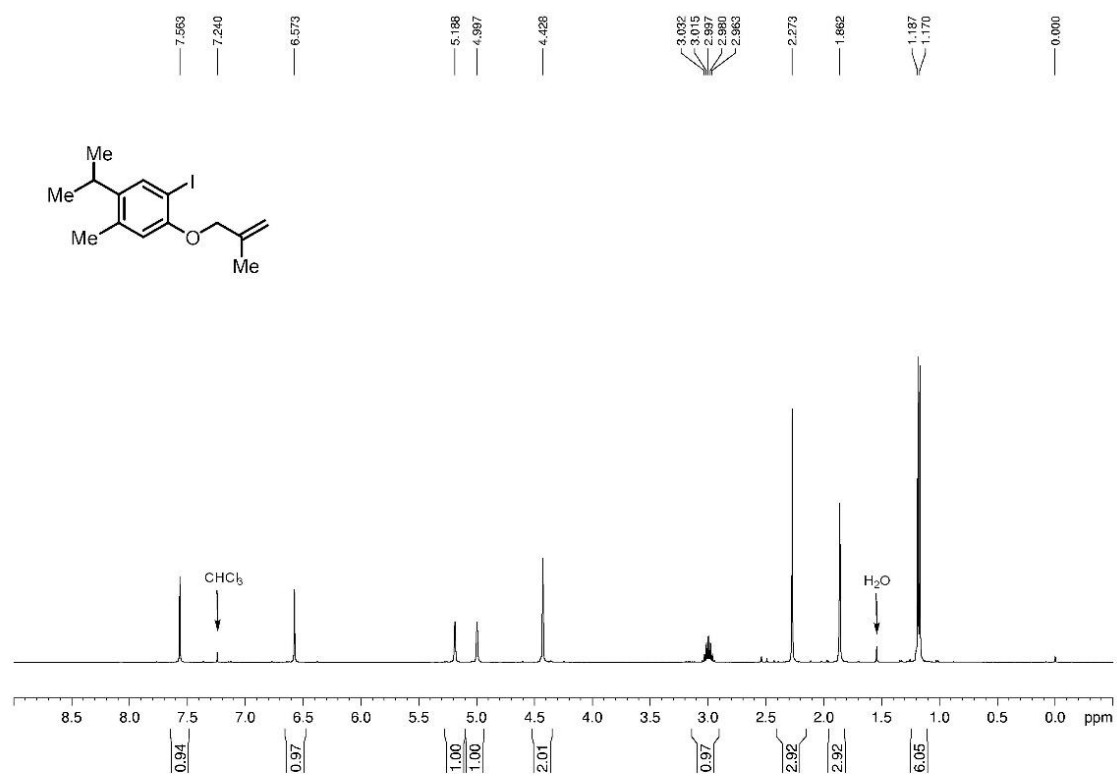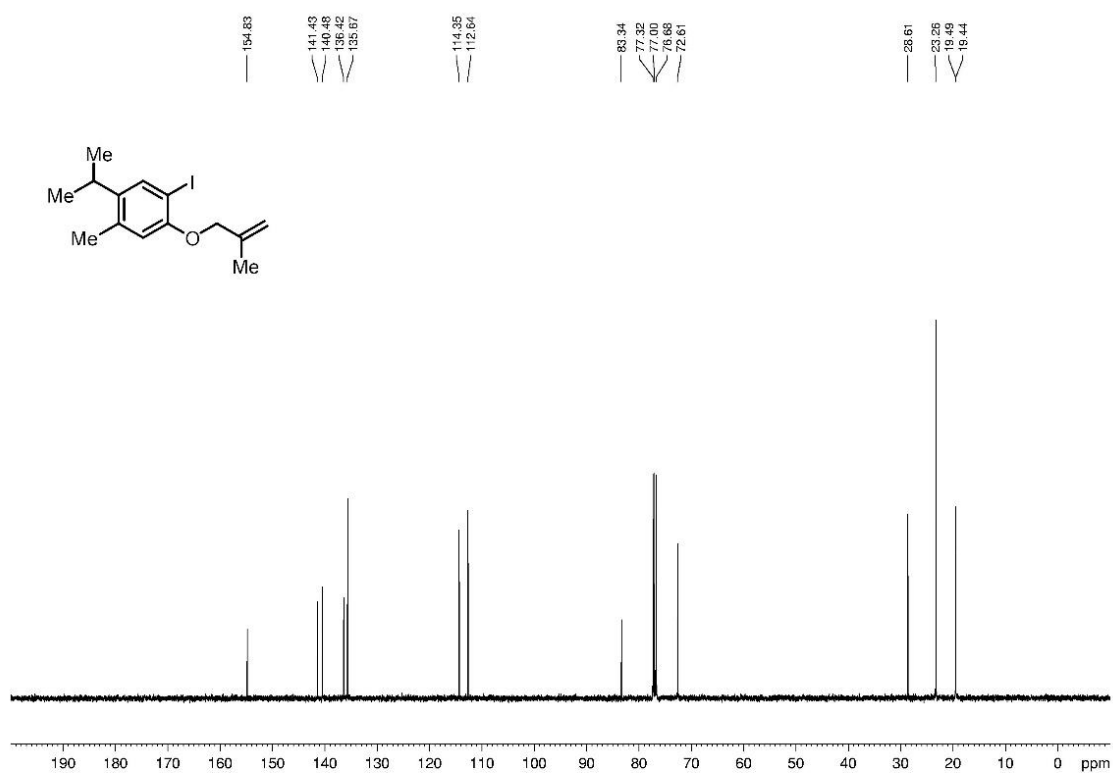

1g;  $^1\text{H}$  NMR (400MHz,  $\text{CDCl}_3$ );  $^{13}\text{C}$  NMR (100MHz,  $\text{CDCl}_3$ )

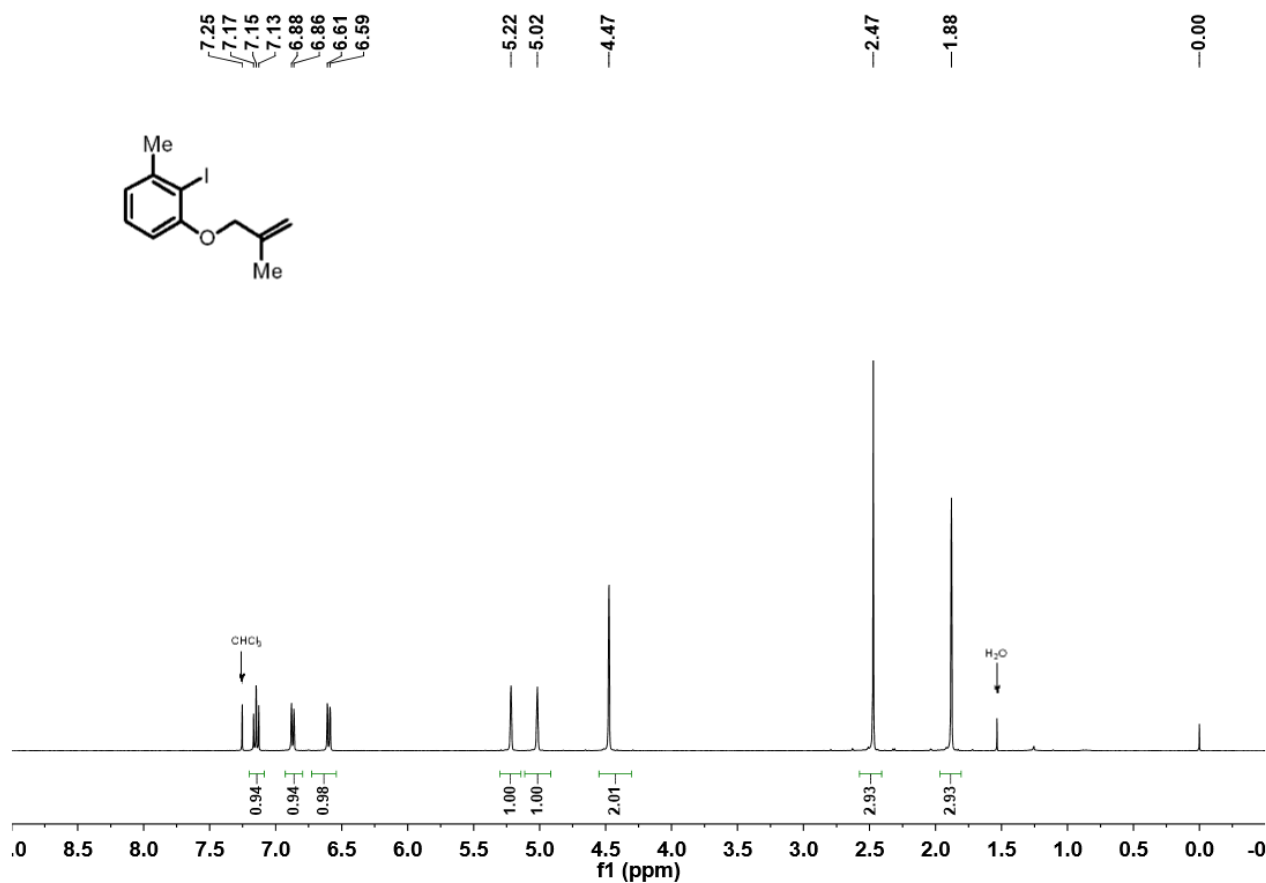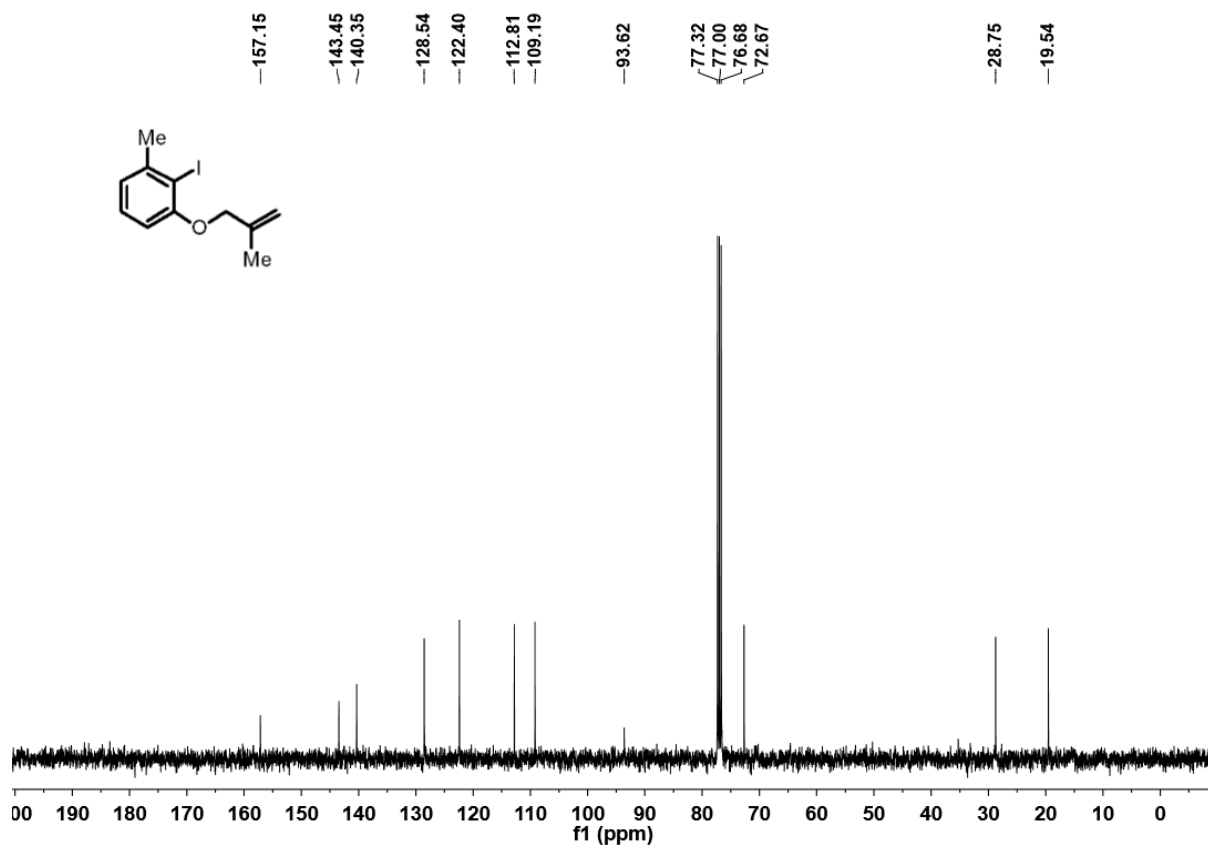



**1i;  $^1\text{H}$  NMR (400MHz,  $\text{CDCl}_3$ );  $^{13}\text{C}$  NMR (100MHz,  $\text{CDCl}_3$ )**

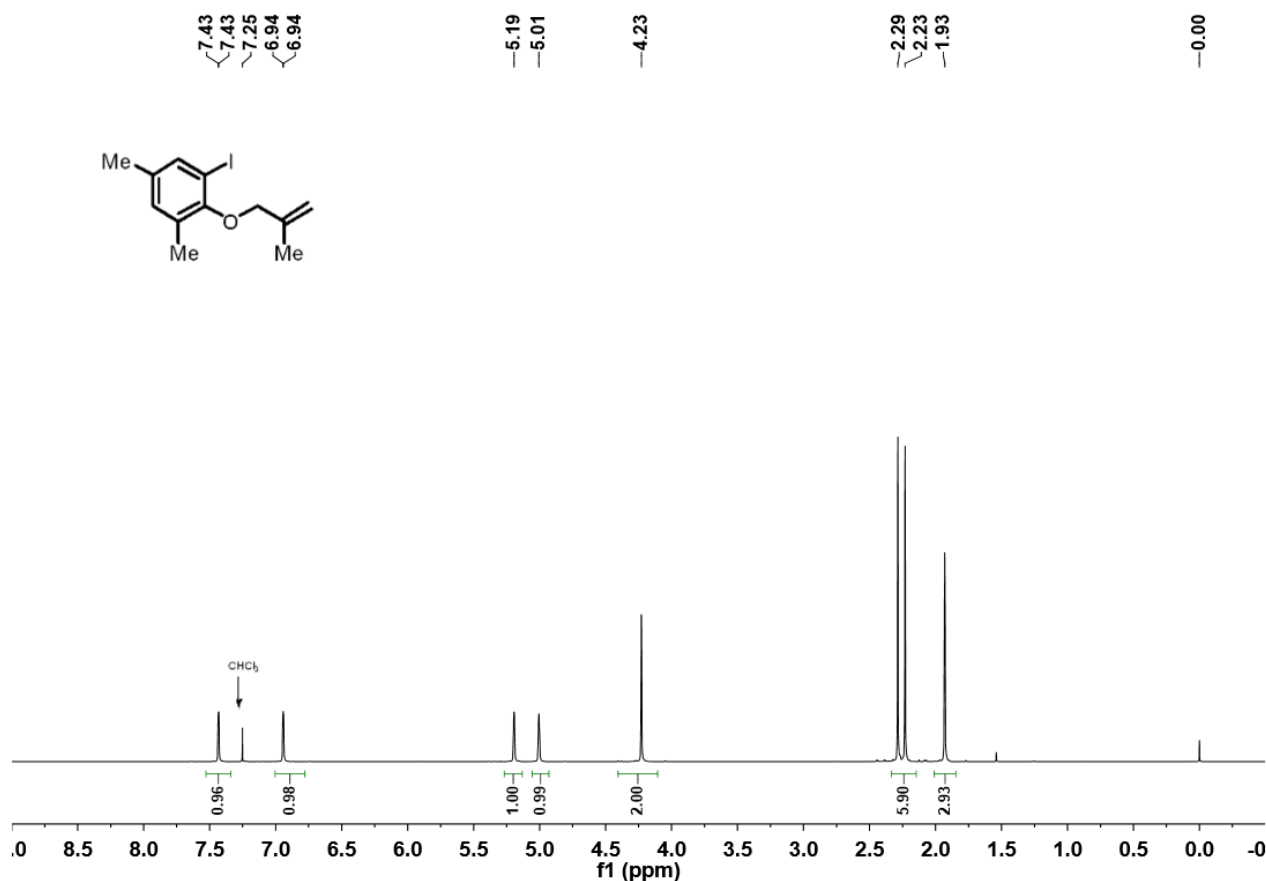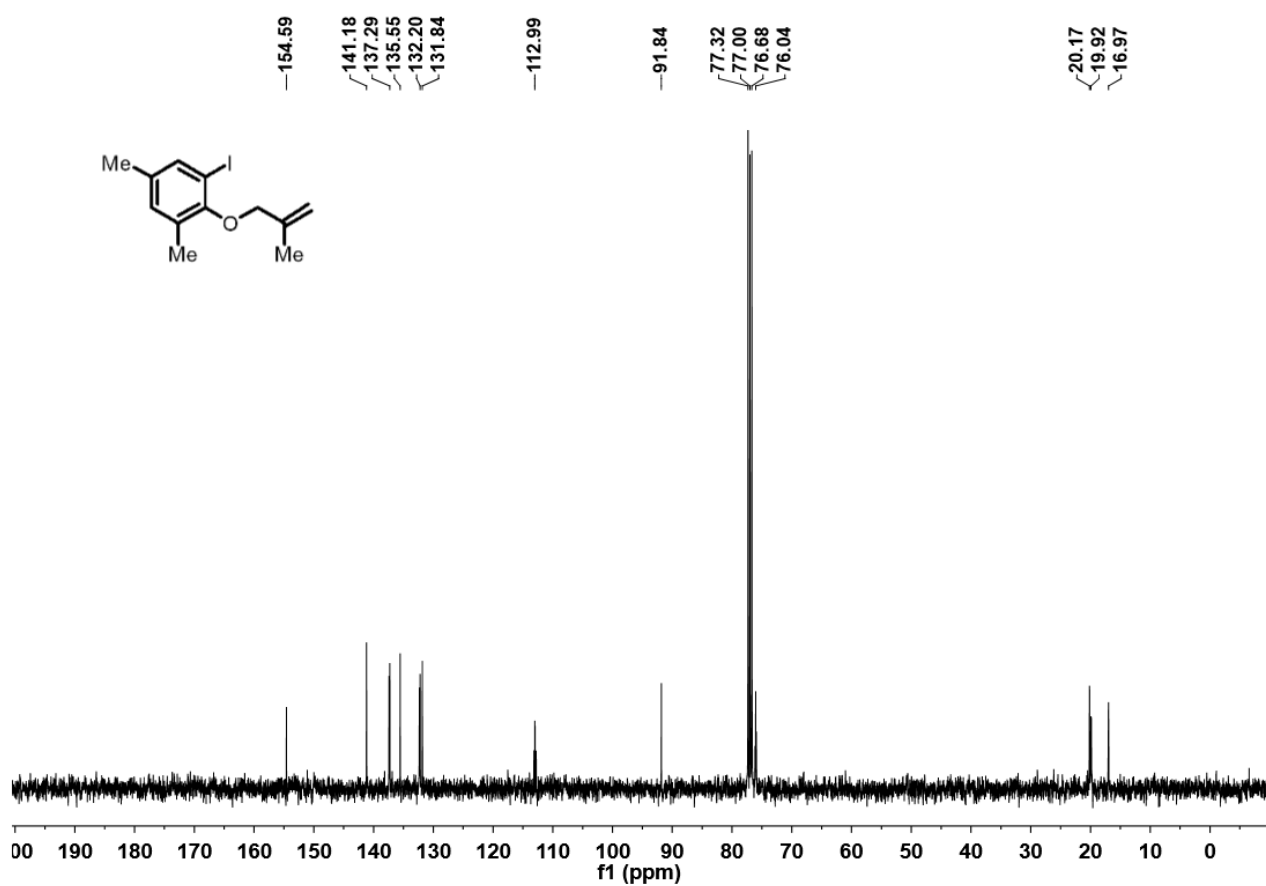

1j;  $^1\text{H}$  NMR (400MHz,  $\text{CDCl}_3$ );  $^{13}\text{C}$  NMR (100MHz,  $\text{CDCl}_3$ )

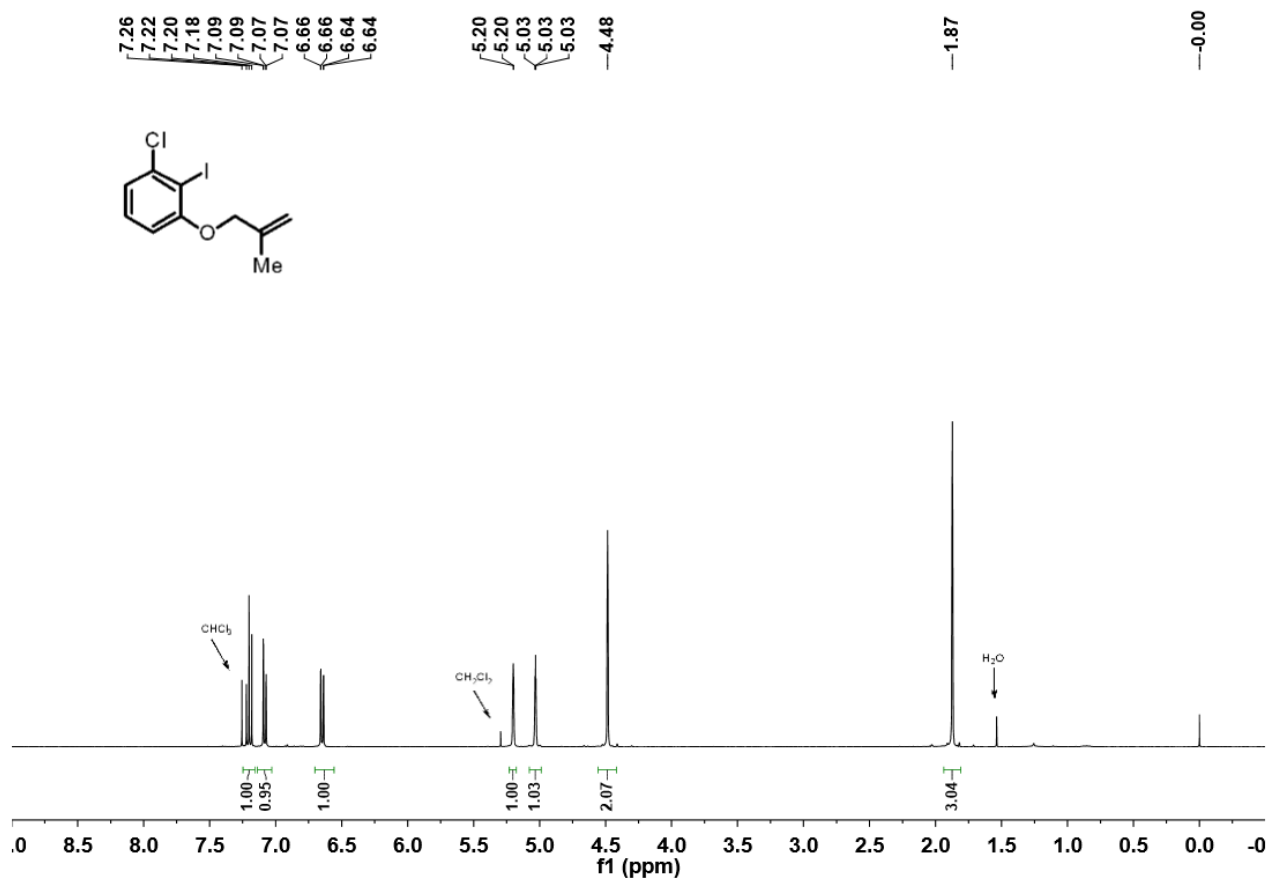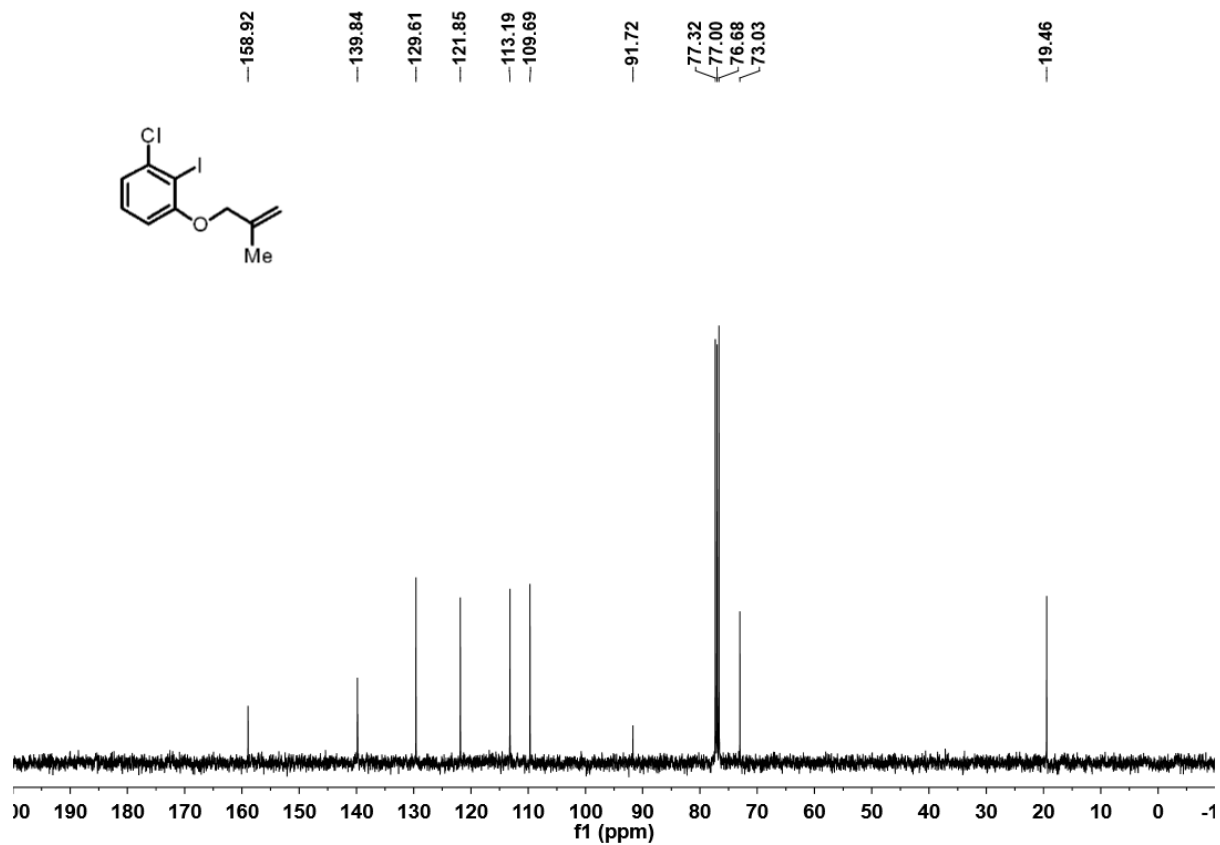

11;  $^1\text{H}$  NMR (400MHz,  $\text{CDCl}_3$ );  $^{13}\text{C}$  NMR (100MHz,  $\text{CDCl}_3$ )

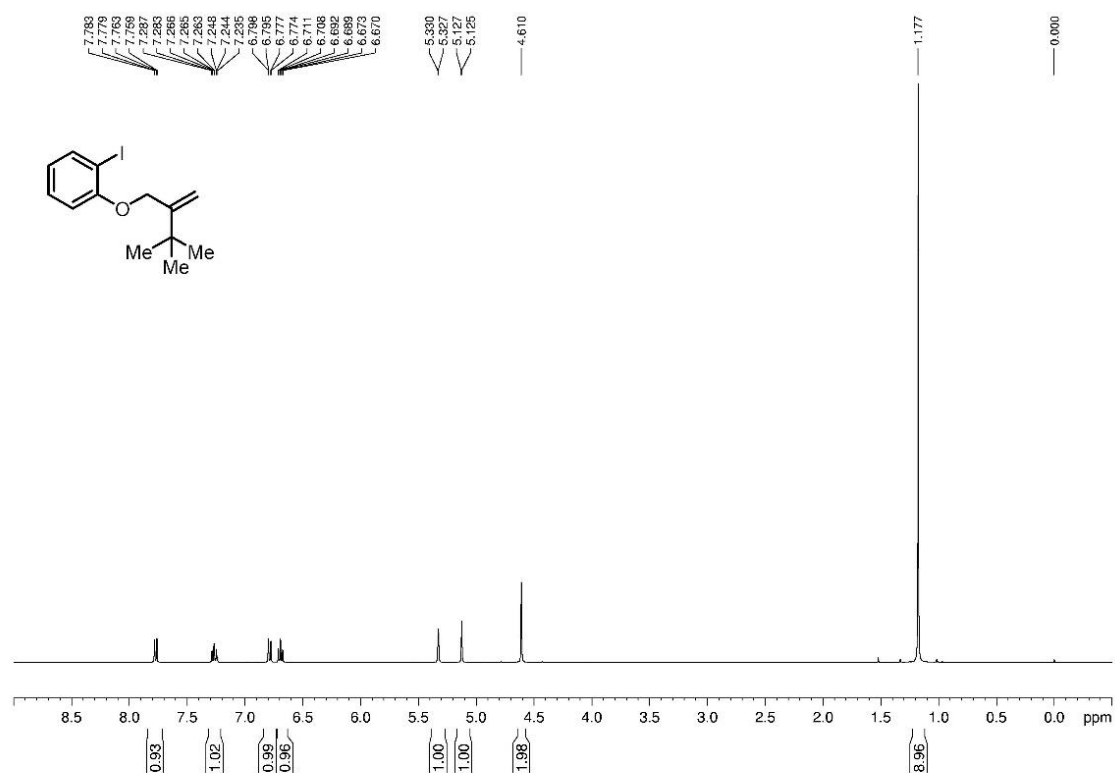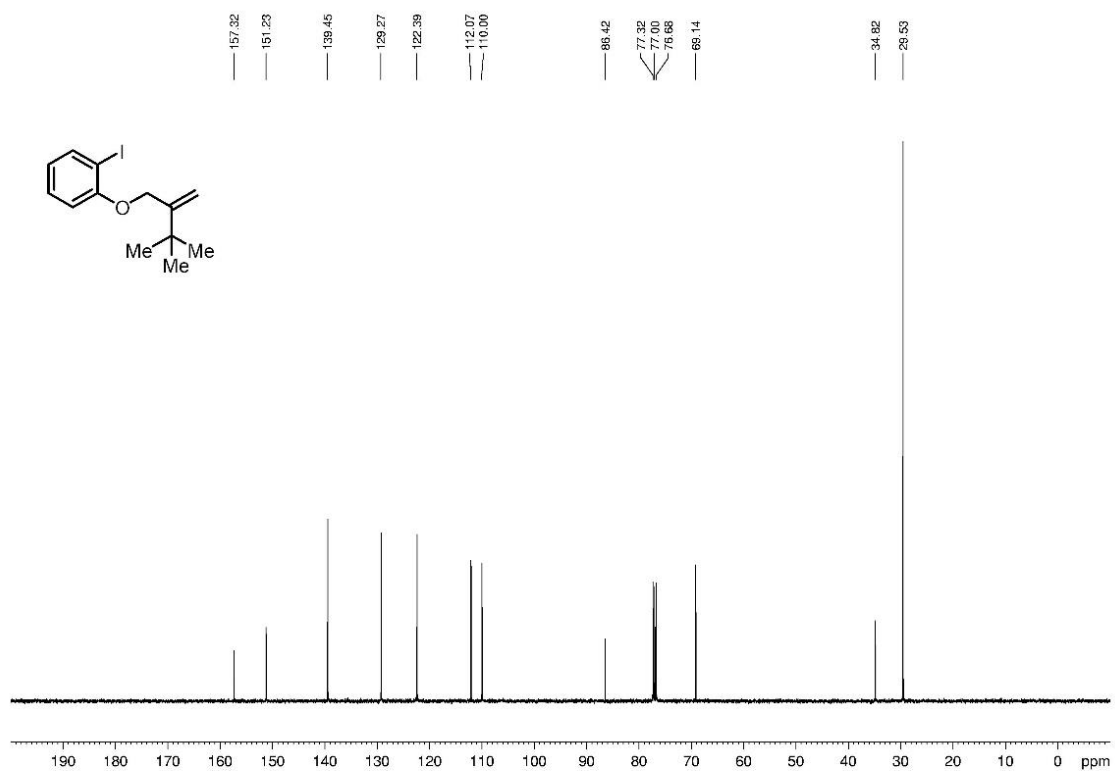

**1m;  $^1\text{H}$  NMR (400MHz,  $\text{CDCl}_3$ );  $^{13}\text{C}$  NMR (100MHz,  $\text{CDCl}_3$ )**

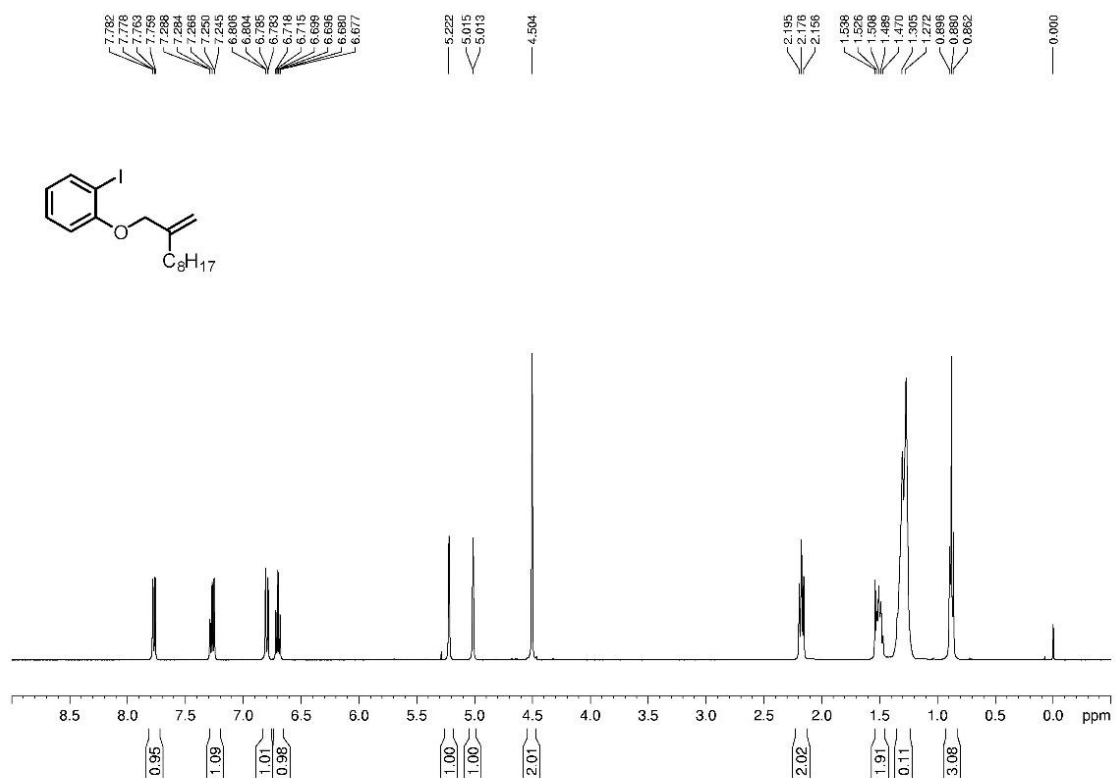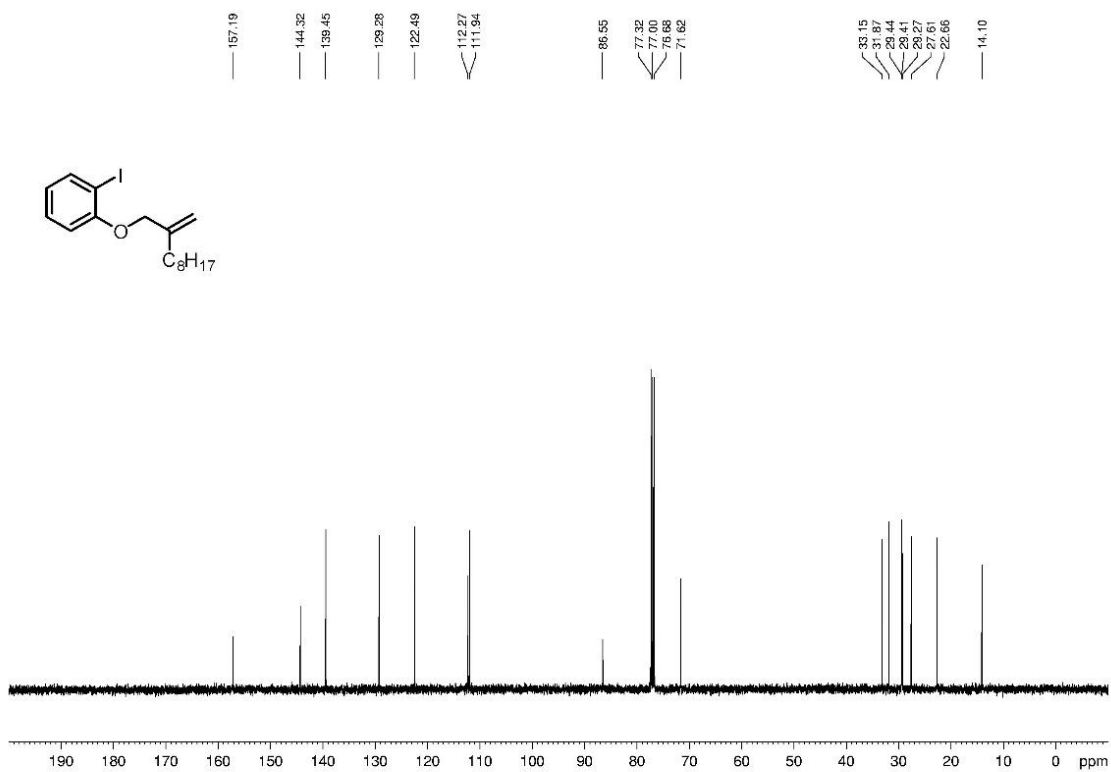

**1o;  $^1\text{H}$  NMR (400MHz,  $\text{CDCl}_3$ );  $^{13}\text{C}$  NMR (100MHz,  $\text{CDCl}_3$ )**

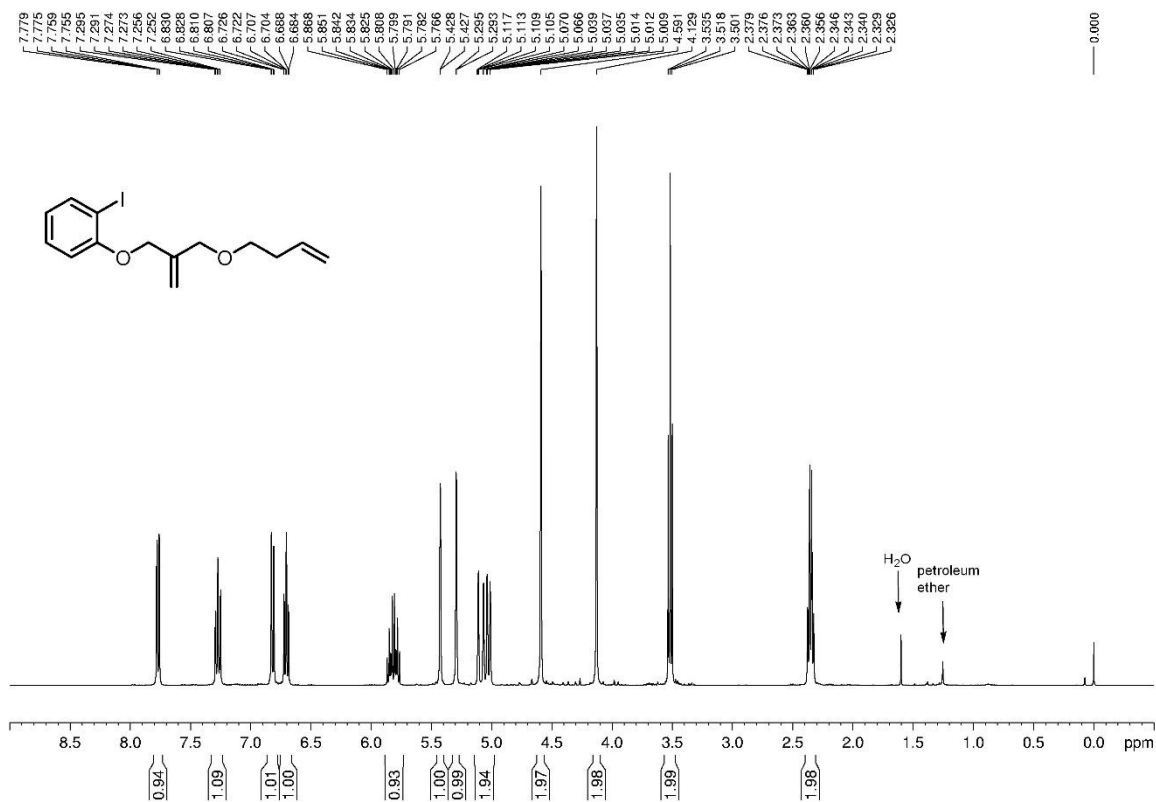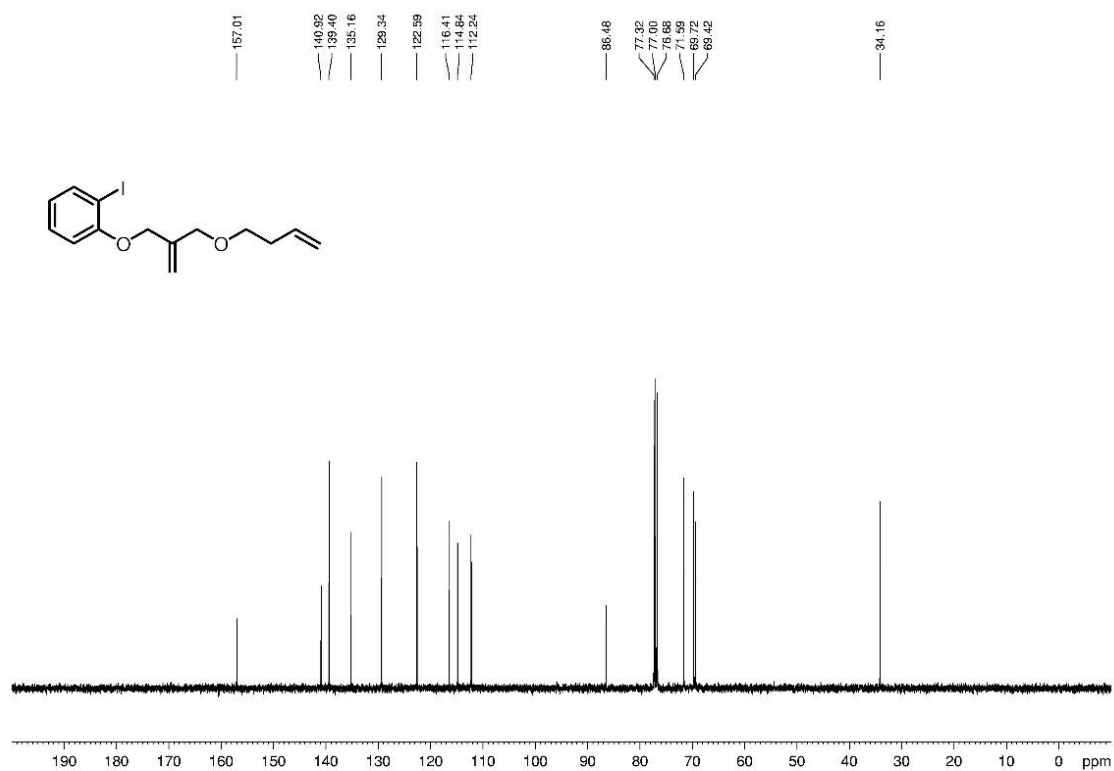

**1q;  $^1\text{H}$  NMR (400MHz,  $\text{CDCl}_3$ );  $^{13}\text{C}$  NMR (100MHz,  $\text{CDCl}_3$ )**

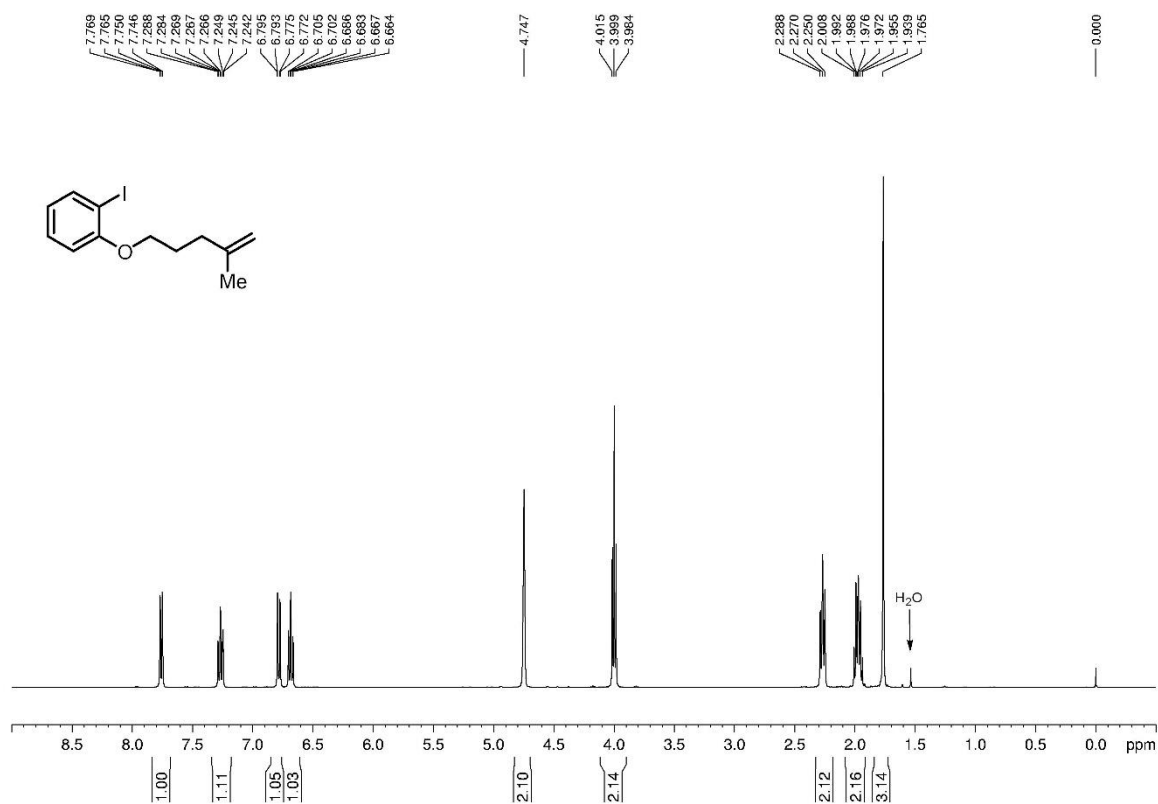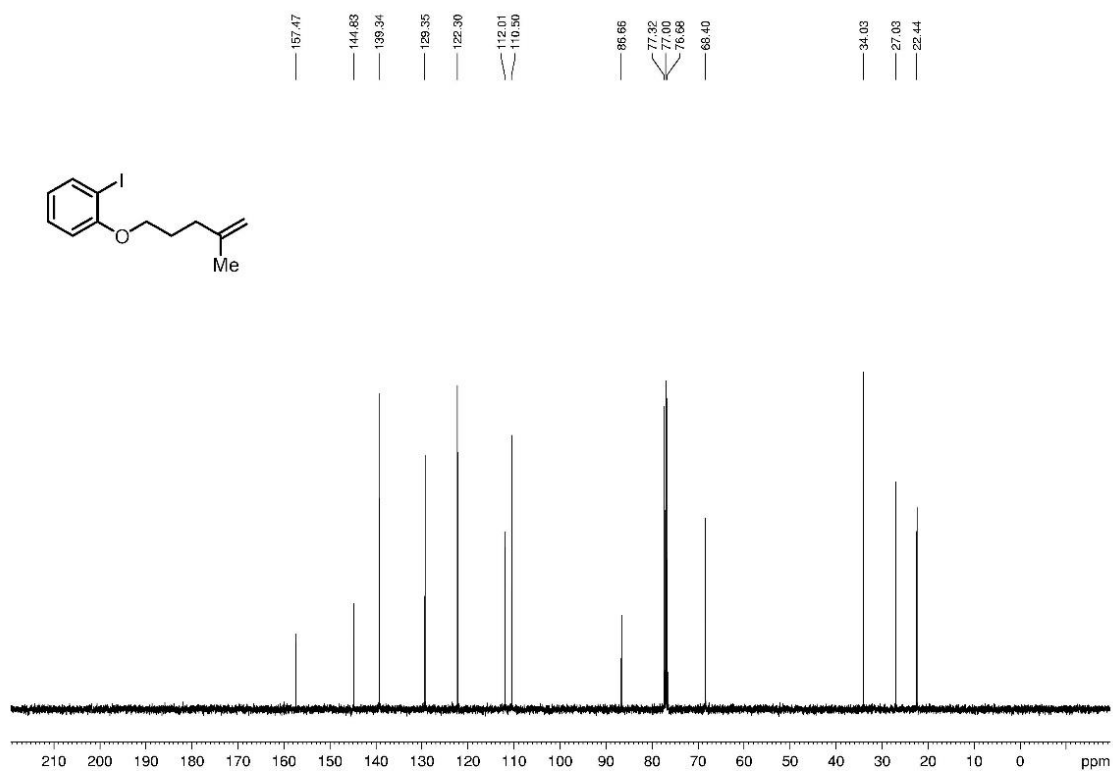

**1r-1;  $^1\text{H}$  NMR (400MHz,  $\text{CDCl}_3$ );  $^{13}\text{C}$  NMR (100MHz,  $\text{CDCl}_3$ )**

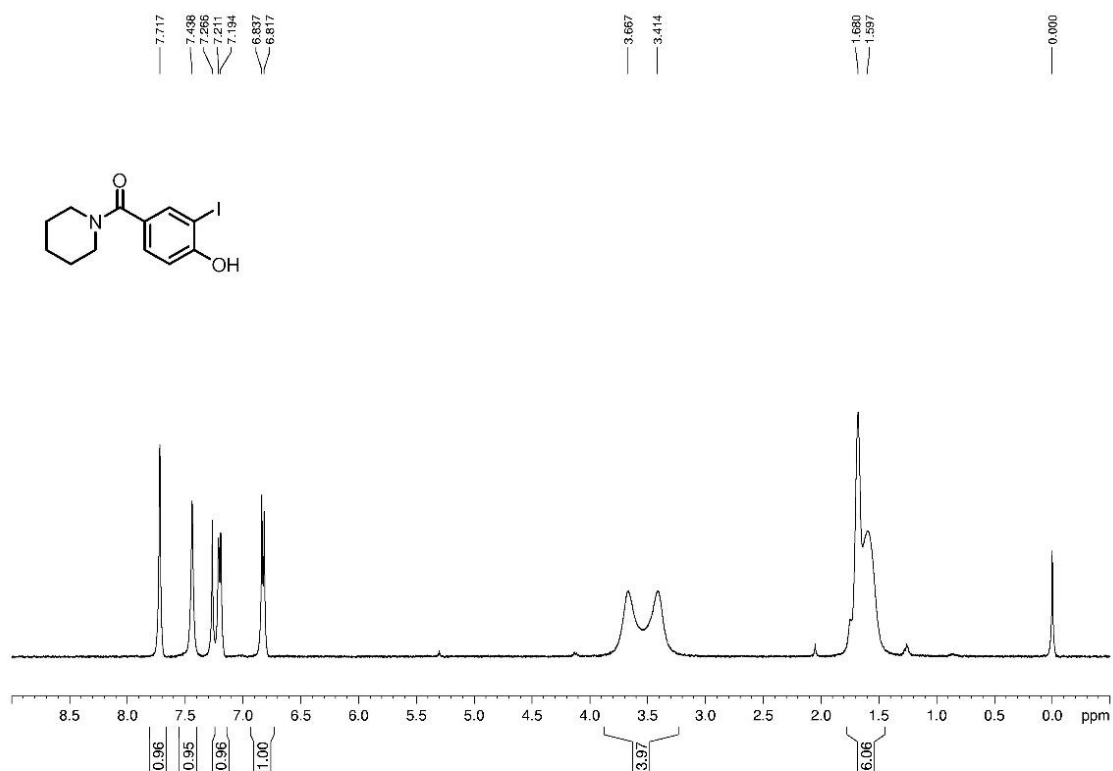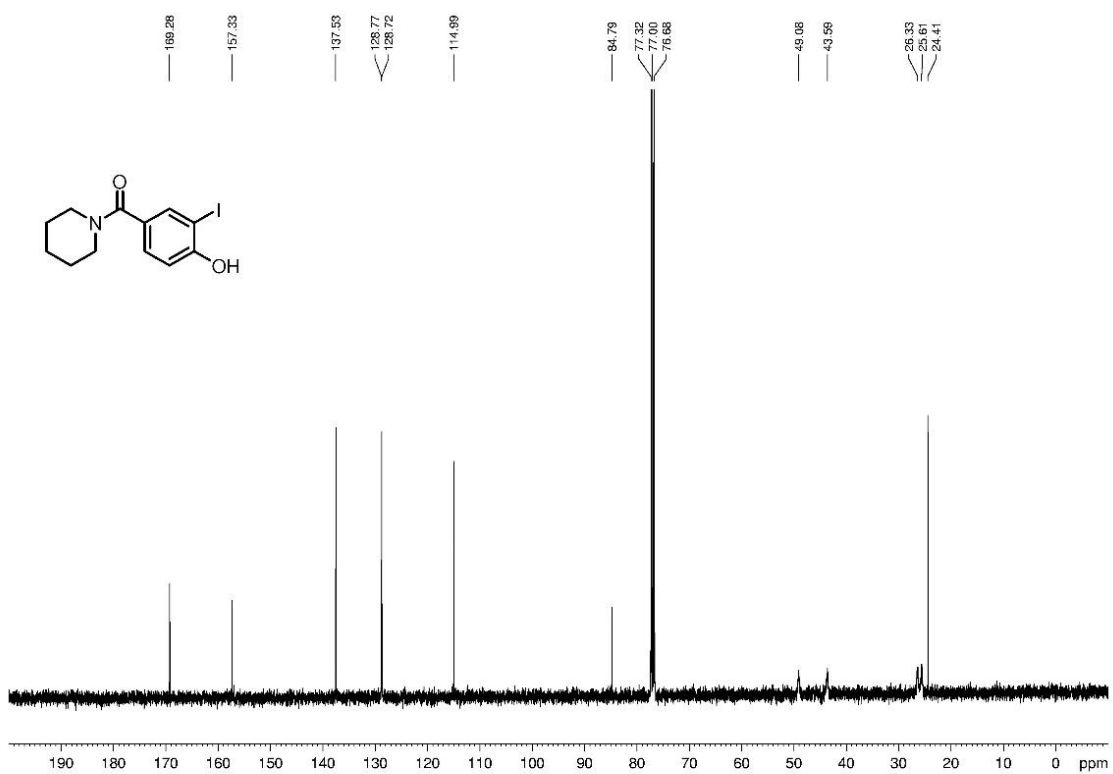

**1r;  $^1\text{H}$  NMR (400MHz,  $\text{CDCl}_3$ );  $^{13}\text{C}$  NMR (100MHz,  $\text{CDCl}_3$ )**

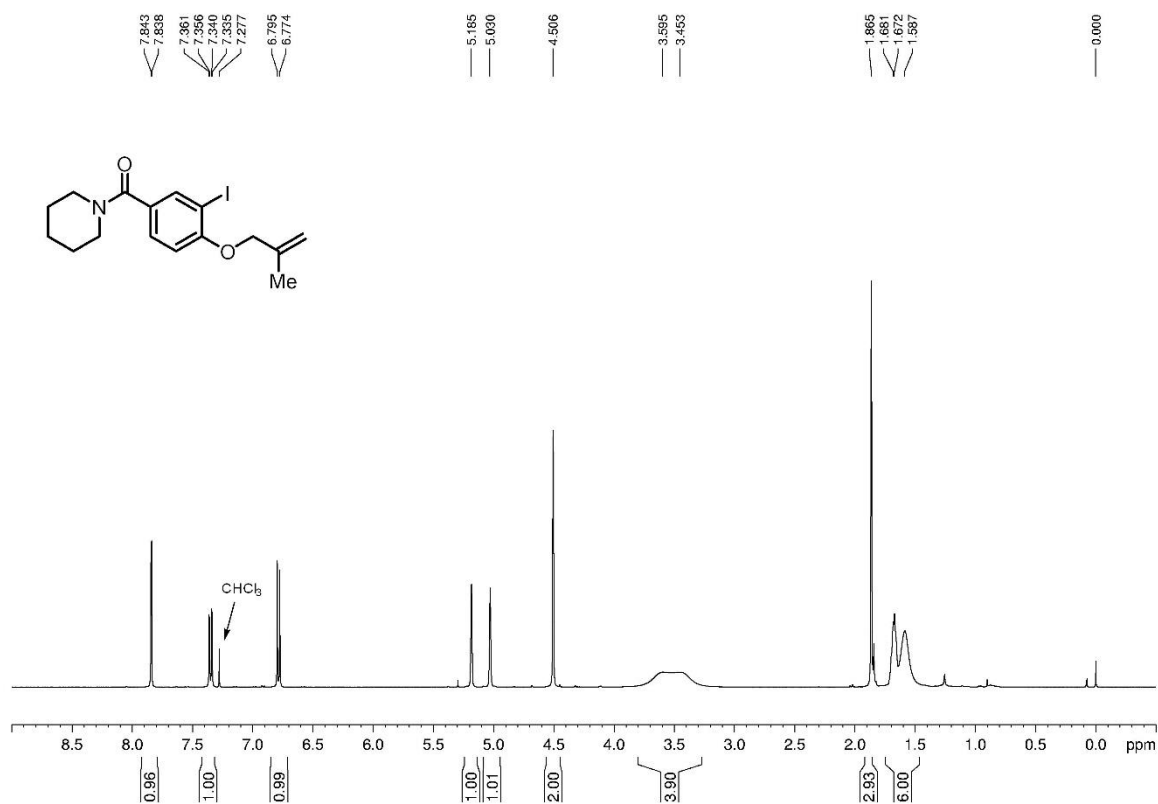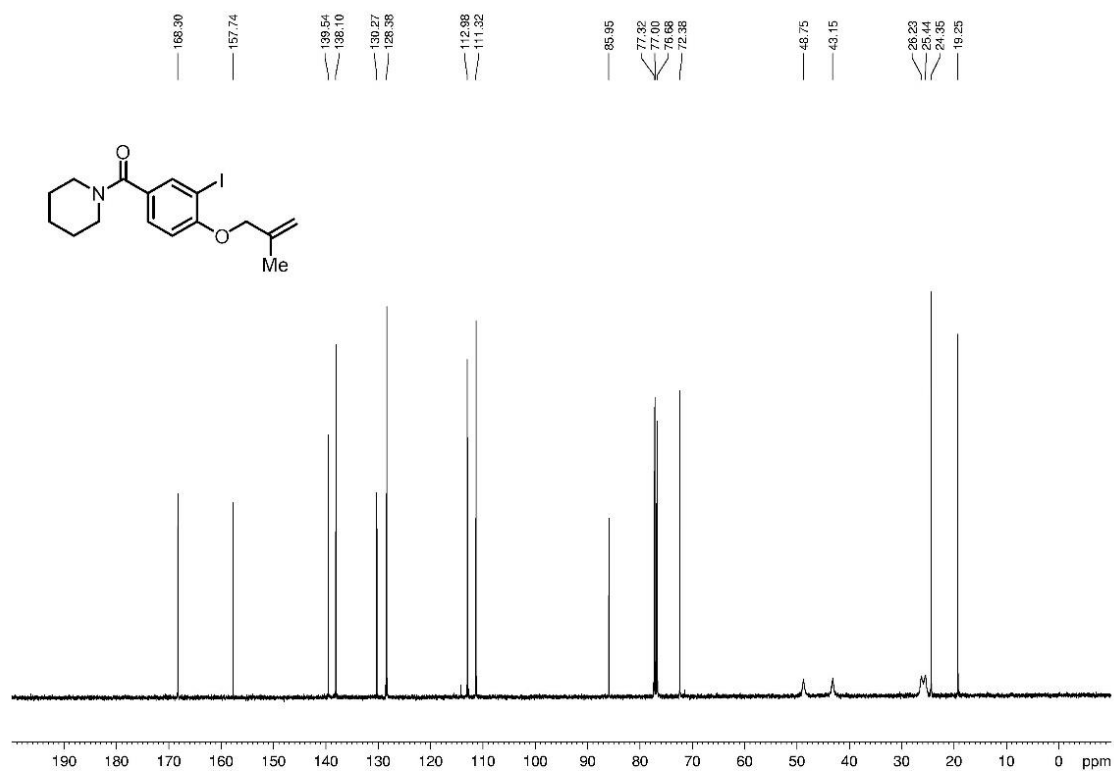



**1z;  $^1\text{H}$  NMR (400MHz,  $\text{CDCl}_3$ );  $^{13}\text{C}$  NMR (100MHz,  $\text{CDCl}_3$ )**

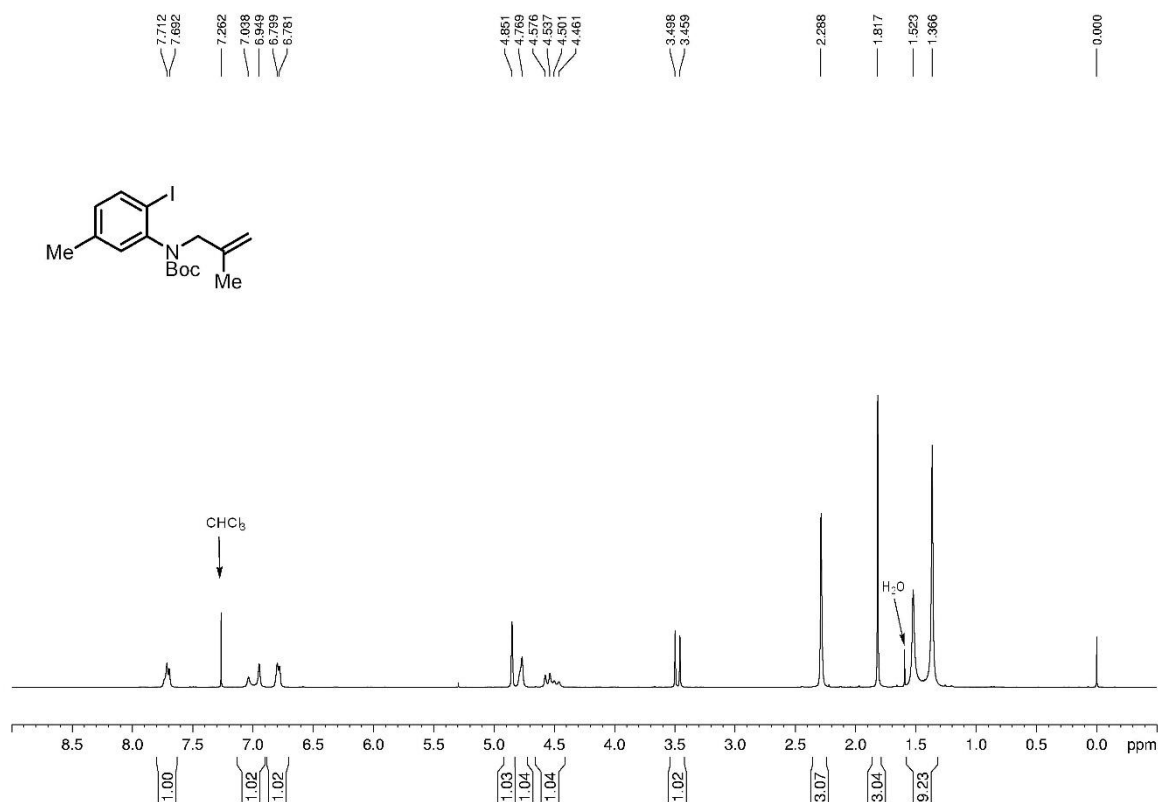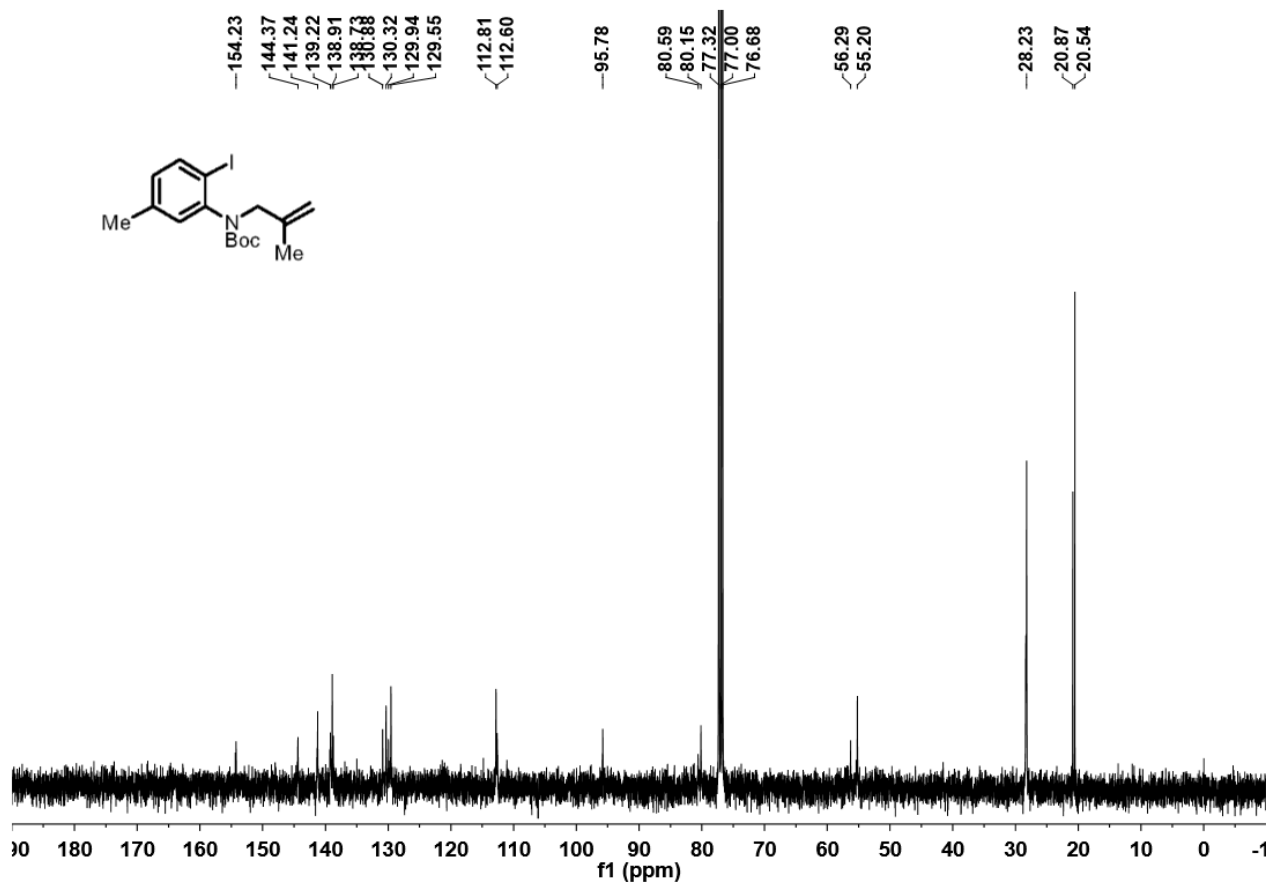

**1aa;  $^1\text{H}$  NMR (400MHz,  $\text{CDCl}_3$ );  $^{13}\text{C}$  NMR (100MHz,  $\text{CDCl}_3$ )**

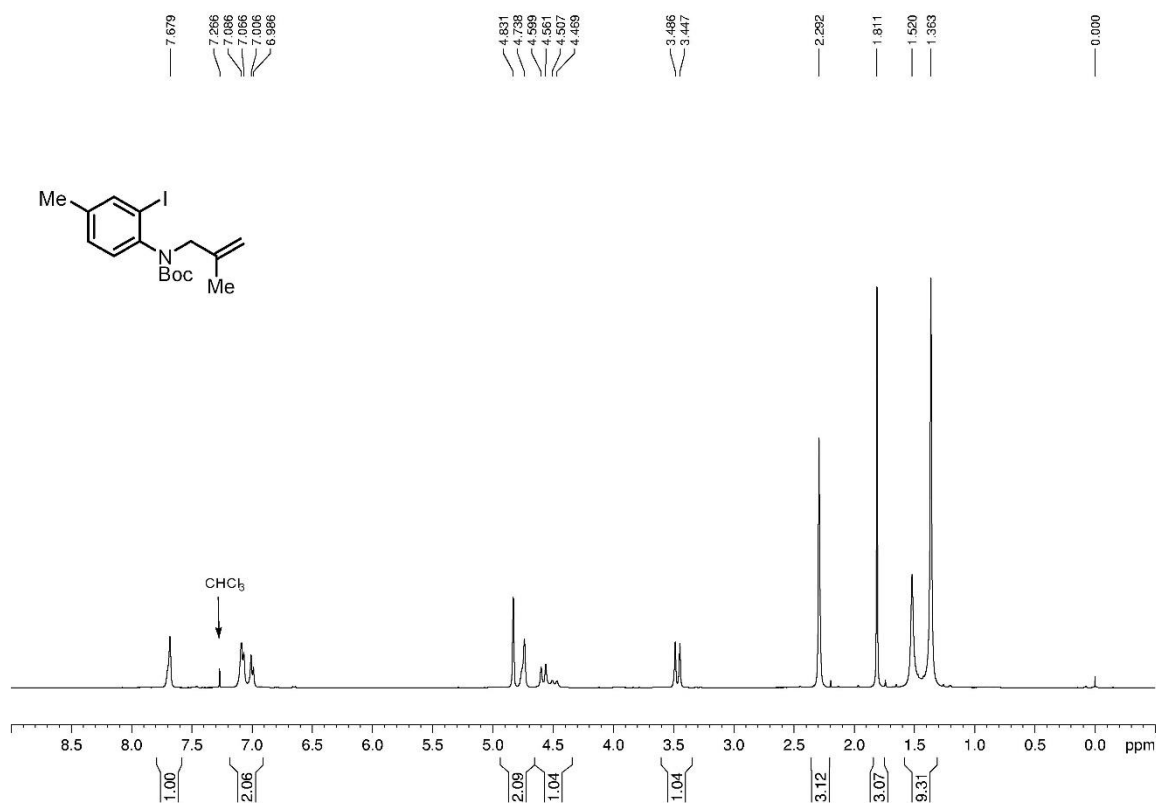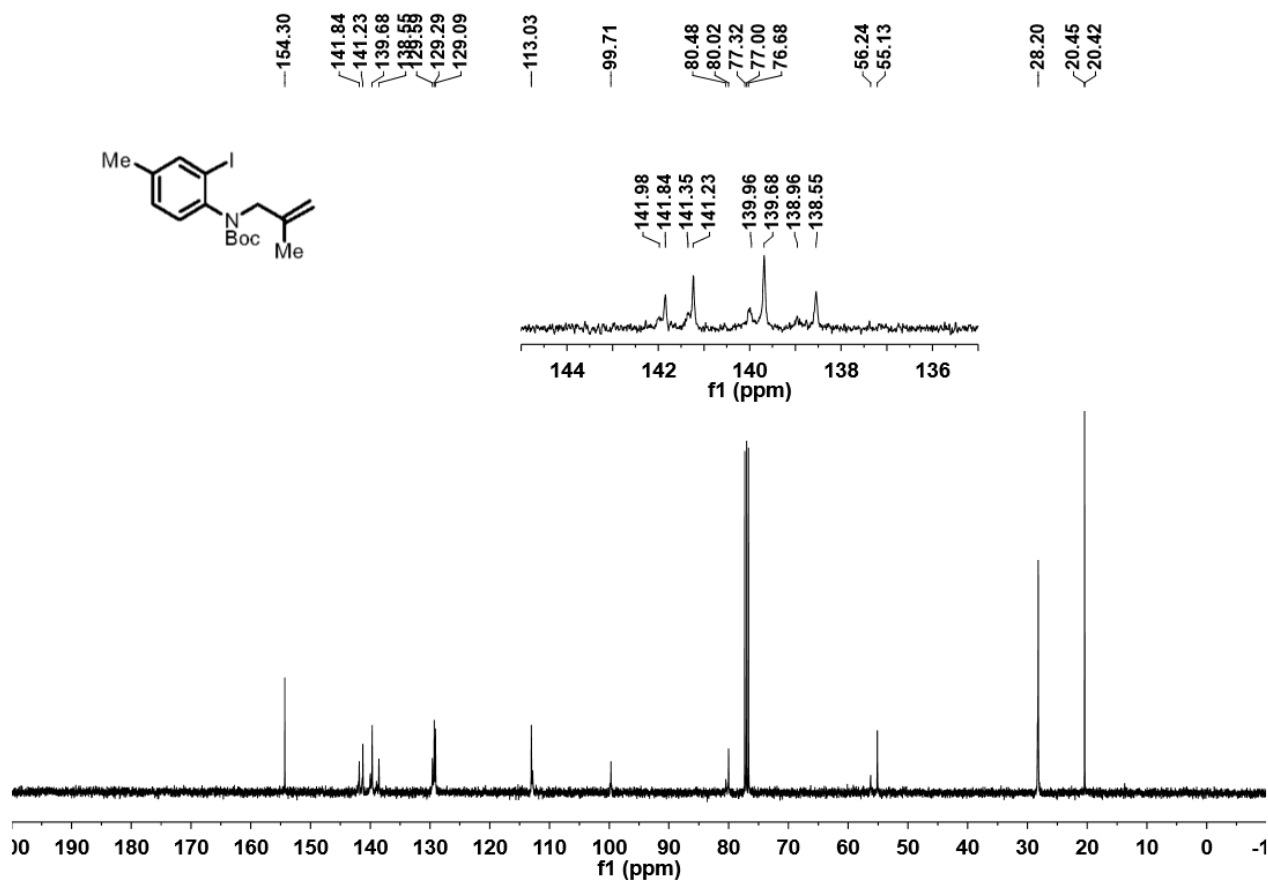

**1ab;  $^1\text{H}$  NMR (400MHz,  $\text{CDCl}_3$ );  $^{13}\text{C}$  NMR (100MHz,  $\text{CDCl}_3$ )**

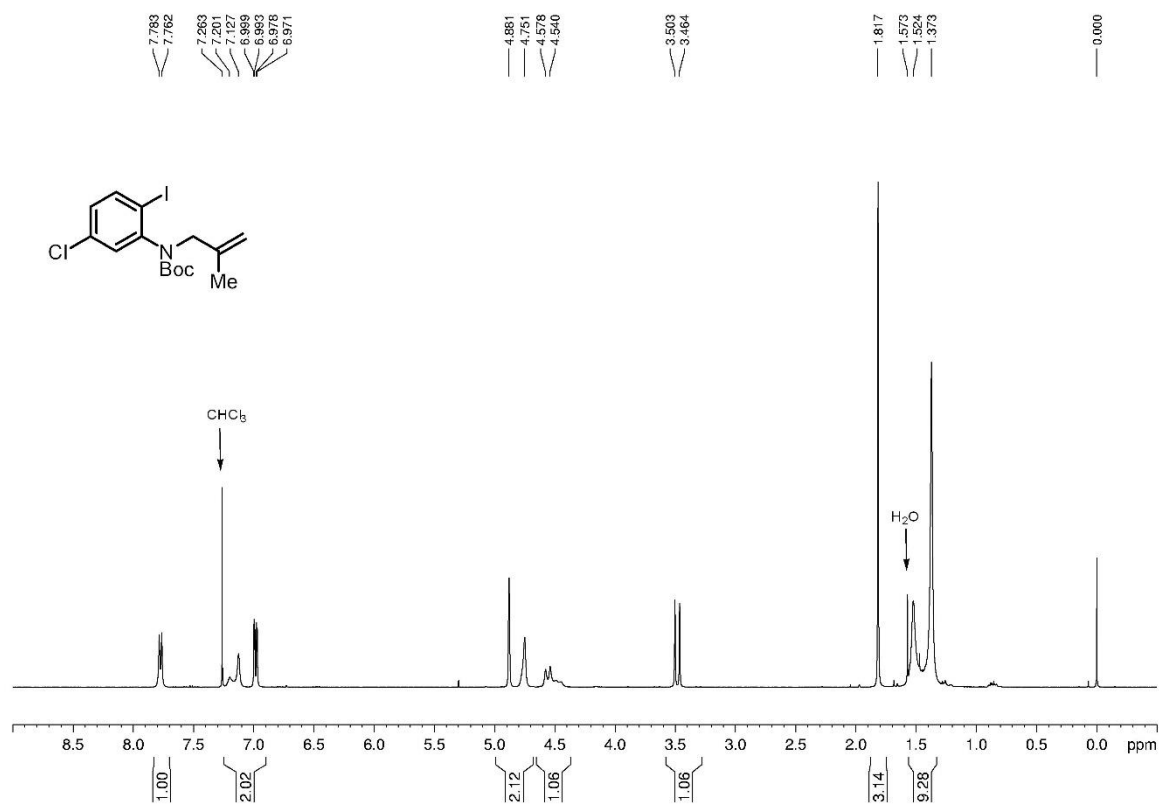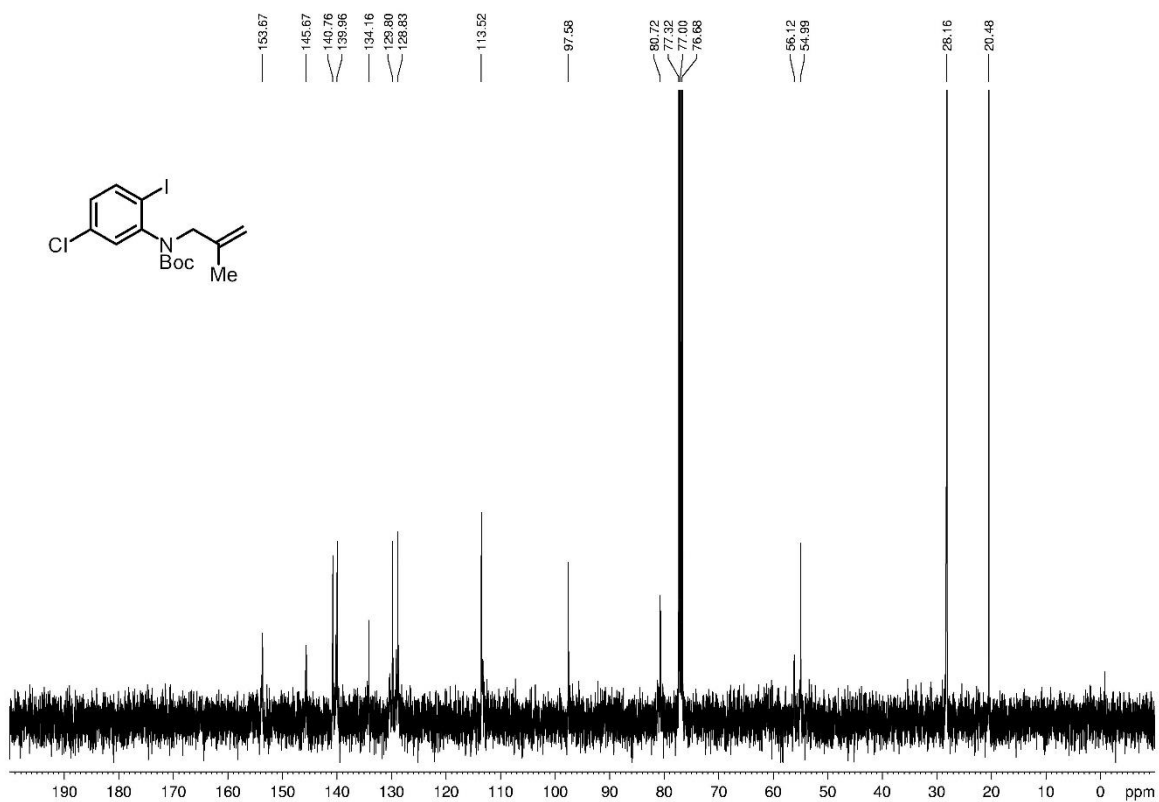

**1ad;  $^1\text{H}$  NMR (400MHz,  $\text{CDCl}_3$ );  $^{13}\text{C}$  NMR (100MHz,  $\text{CDCl}_3$ )**

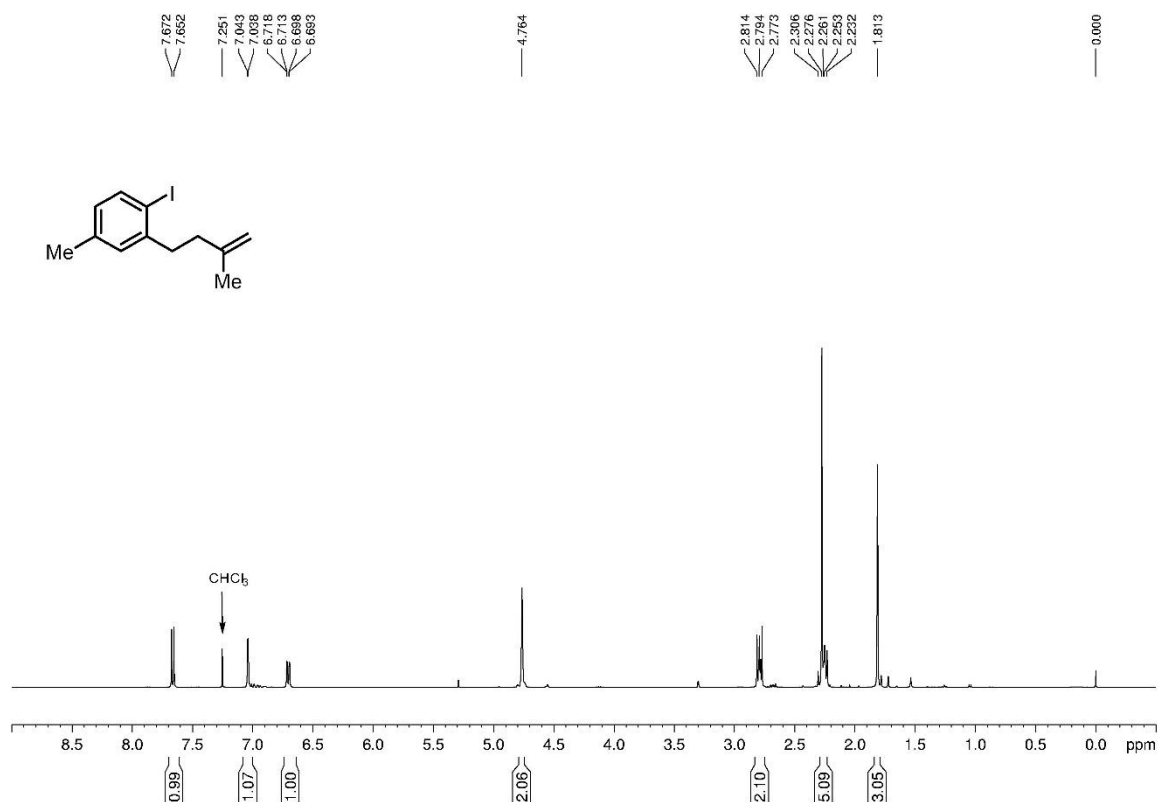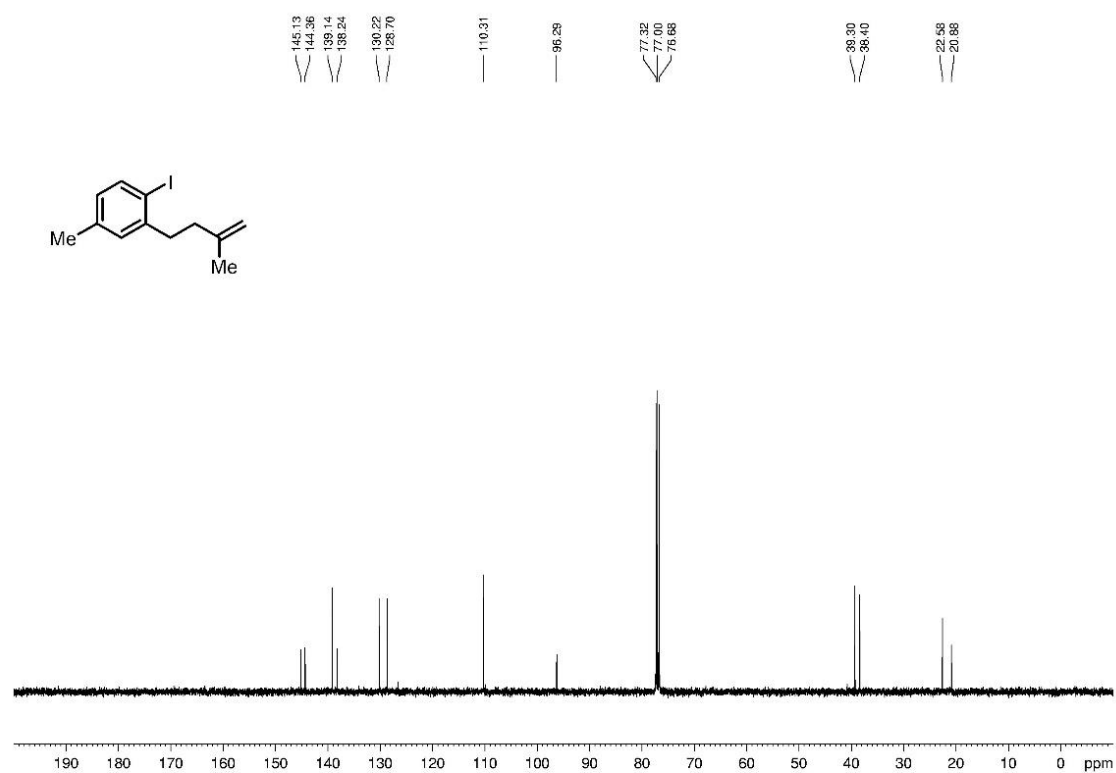

**1ae;  $^1\text{H}$  NMR (400MHz,  $\text{CDCl}_3$ );  $^{13}\text{C}$  NMR (100MHz,  $\text{CDCl}_3$ )**

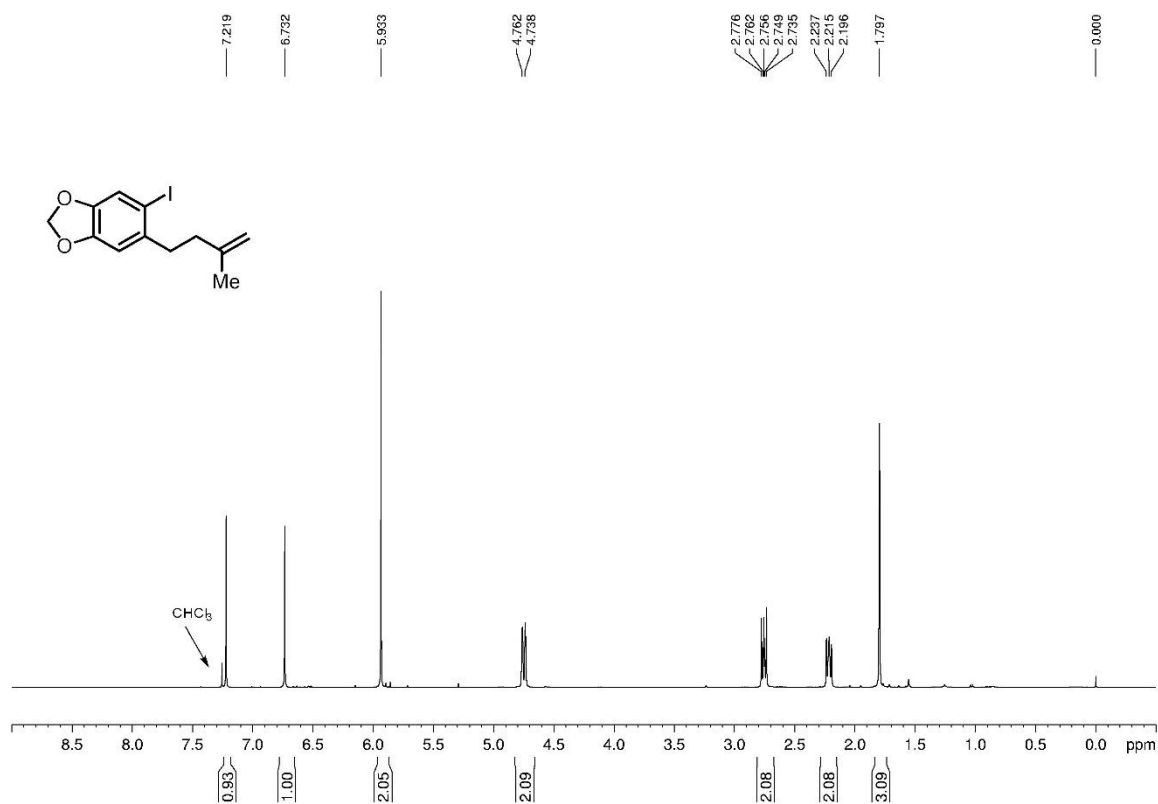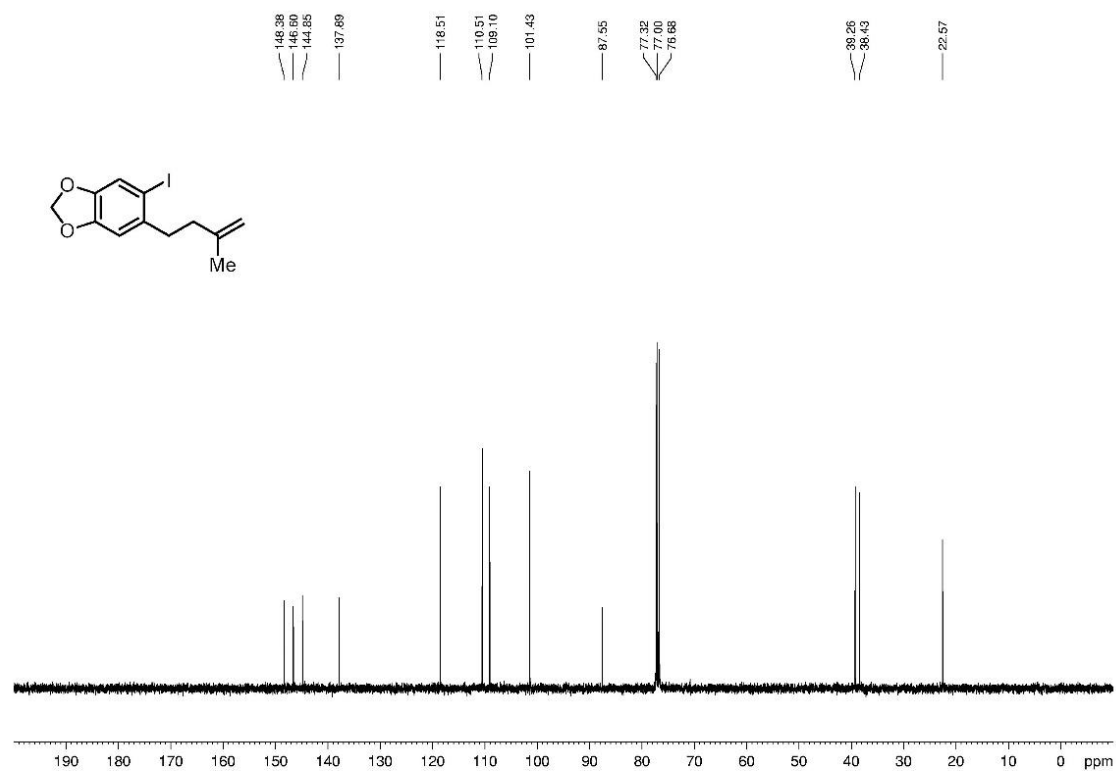

1af;  $^1\text{H}$  NMR (400MHz,  $\text{CDCl}_3$ );  $^{13}\text{C}$  NMR (100MHz,  $\text{CDCl}_3$ )

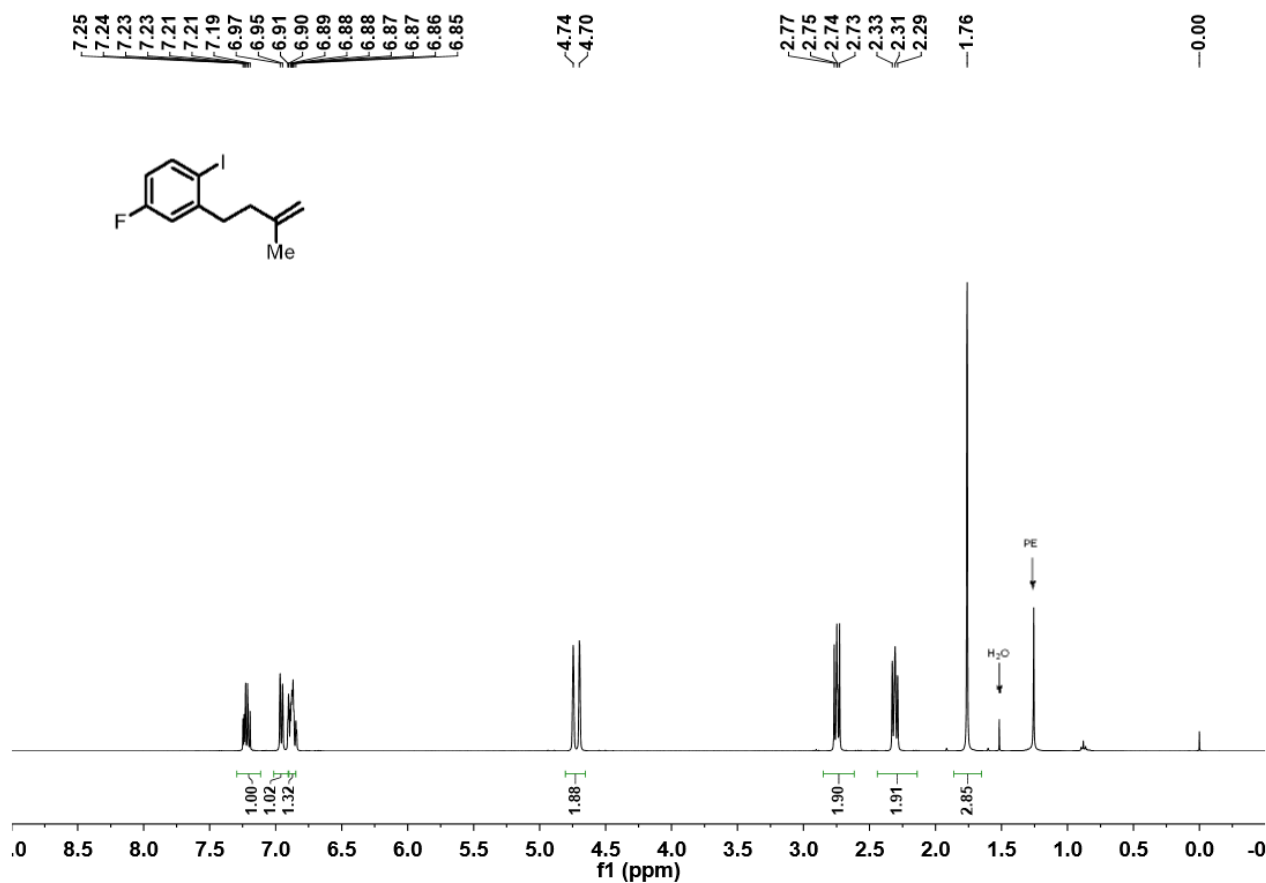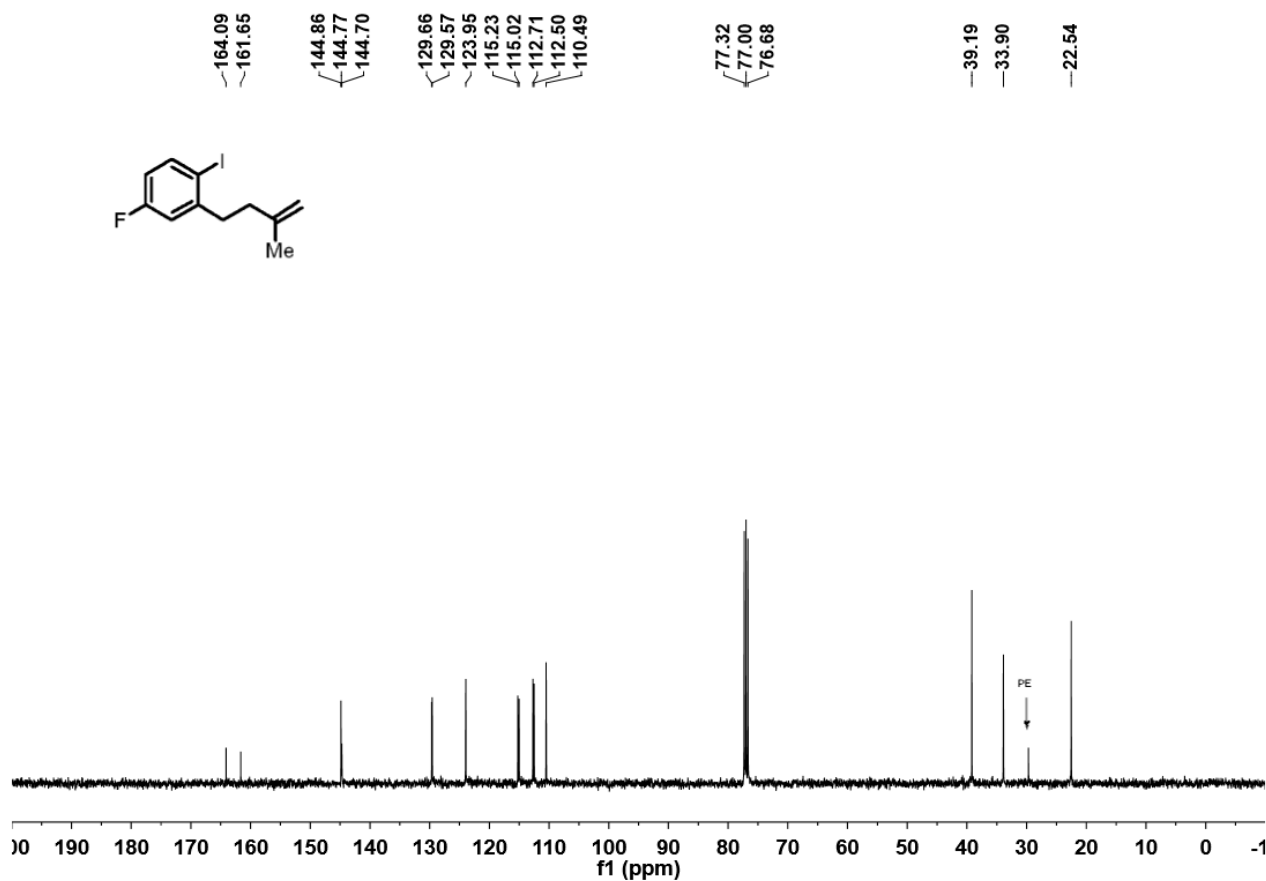

**1af;  $^{19}\text{F}$  NMR (376MHz,  $\text{CDCl}_3$ )**

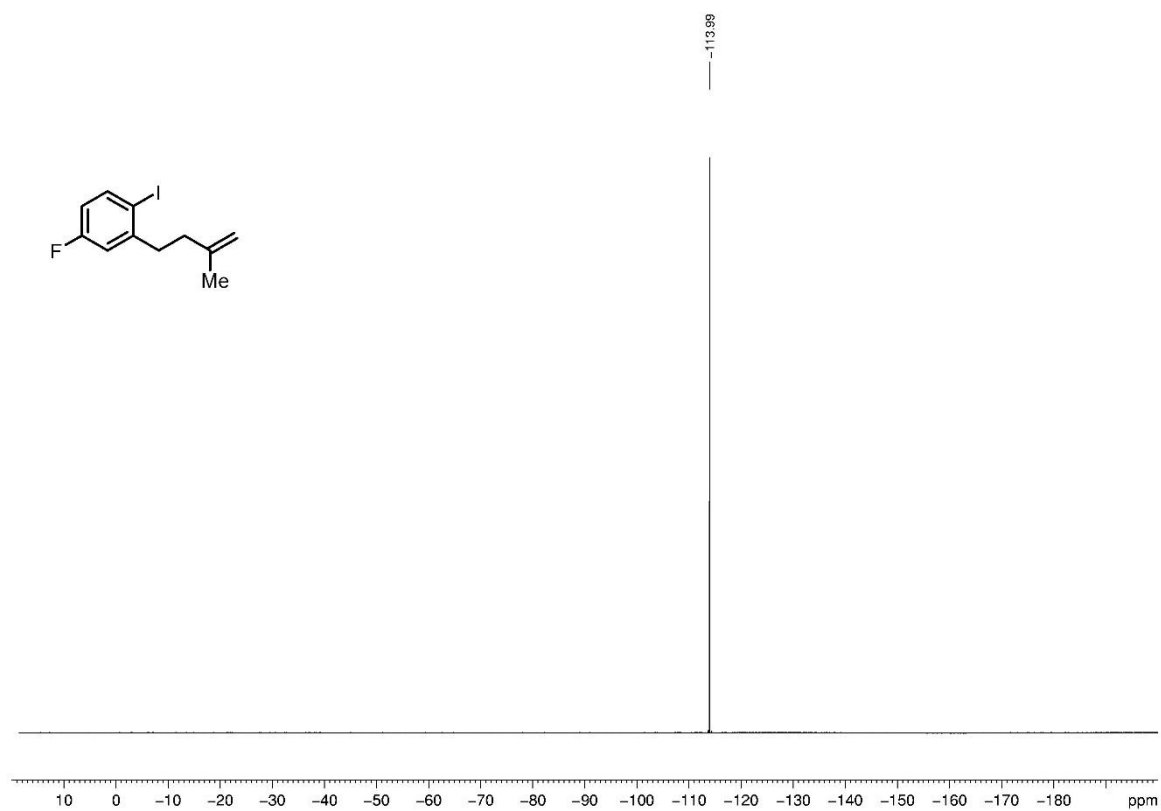

2o;  $^1\text{H}$  NMR (600MHz,  $\text{CDCl}_3$ );  $^{13}\text{C}$  NMR (150MHz,  $\text{CDCl}_3$ )

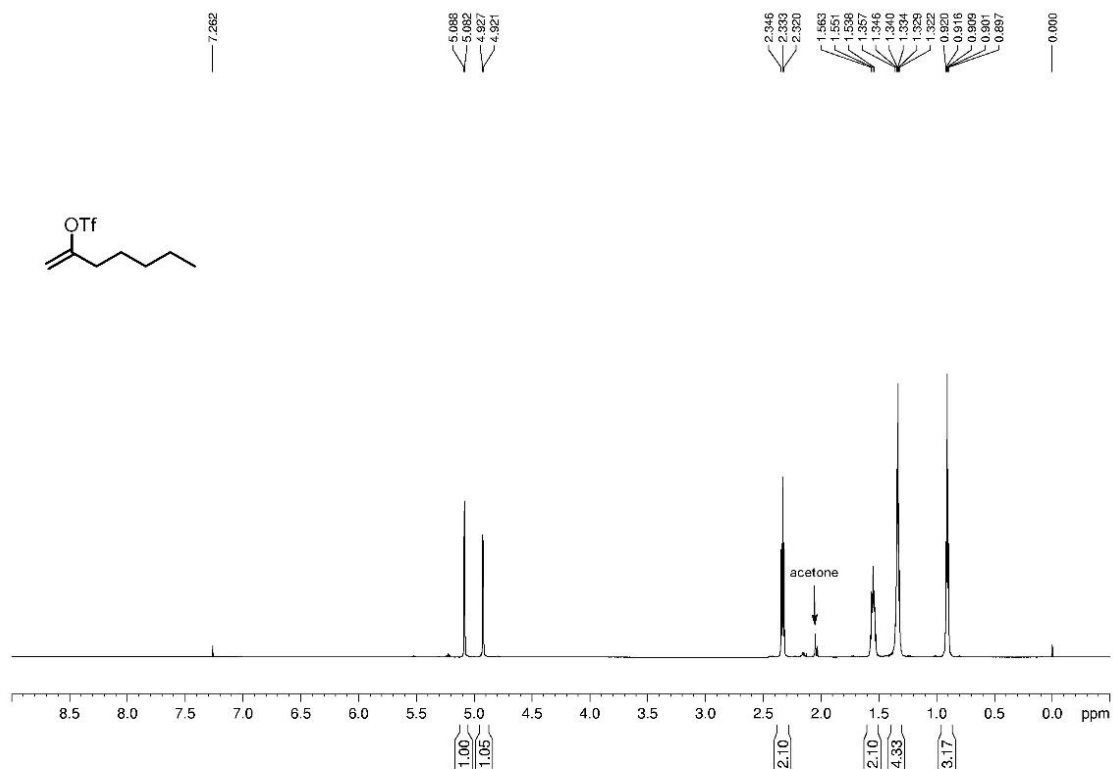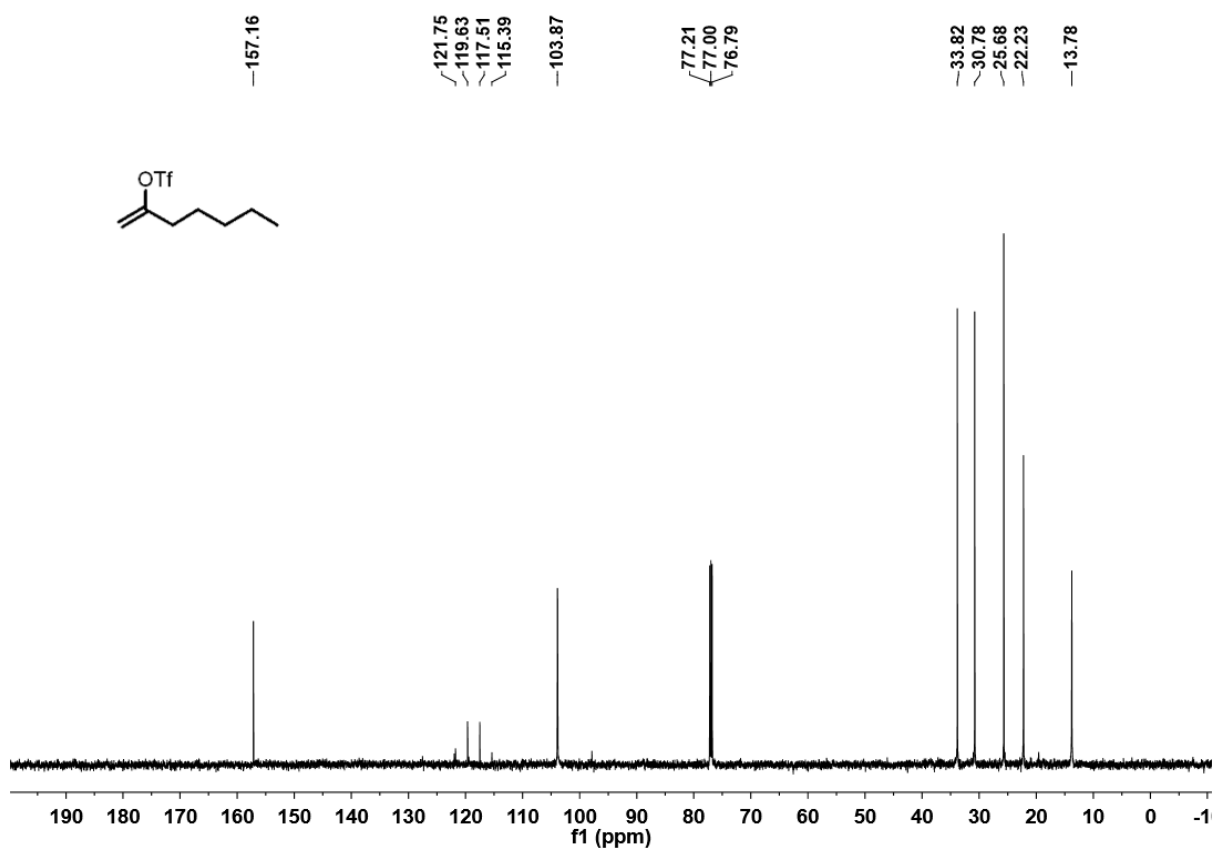



2o;  $^{19}\text{F}$  NMR (564MHz,  $\text{CDCl}_3$ )

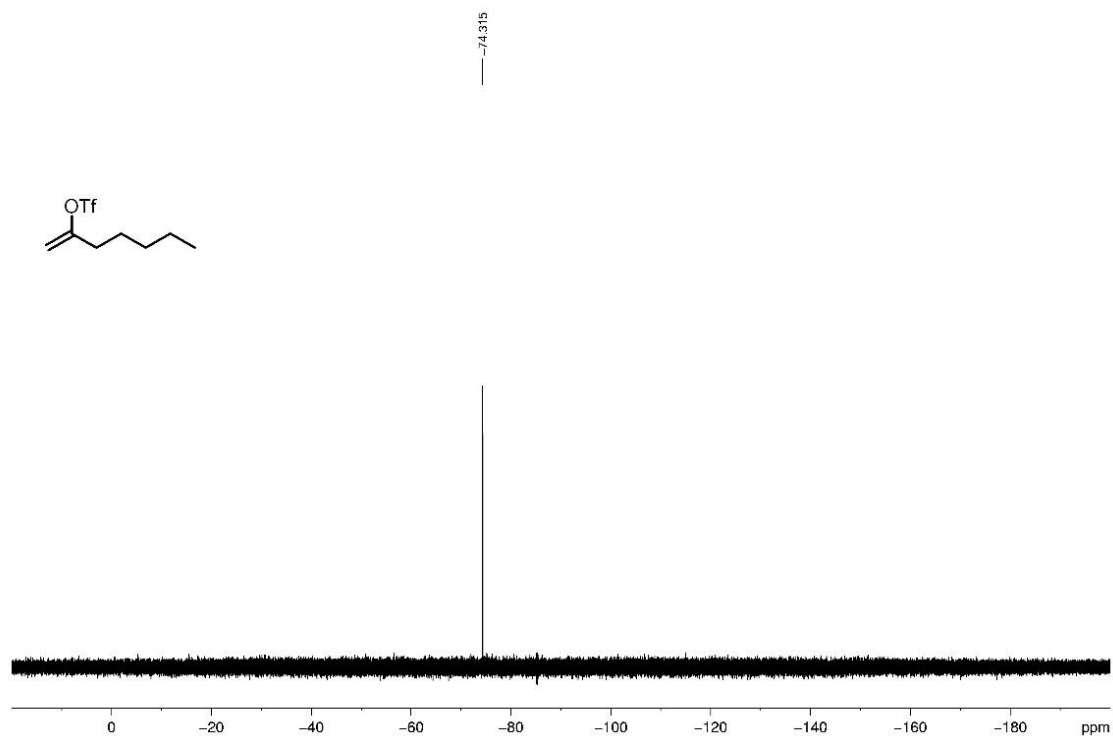

**2p;  $^1\text{H}$  NMR (400MHz,  $\text{CDCl}_3$ );  $^{13}\text{C}$  NMR (100MHz,  $\text{CDCl}_3$ )**

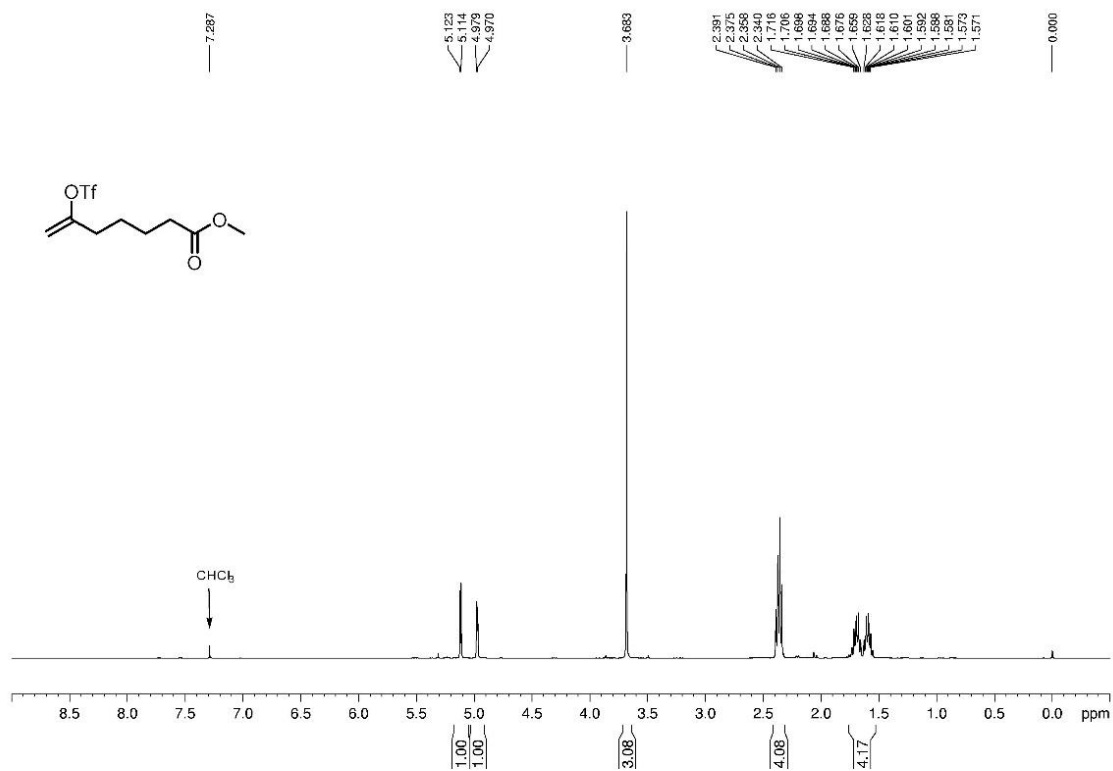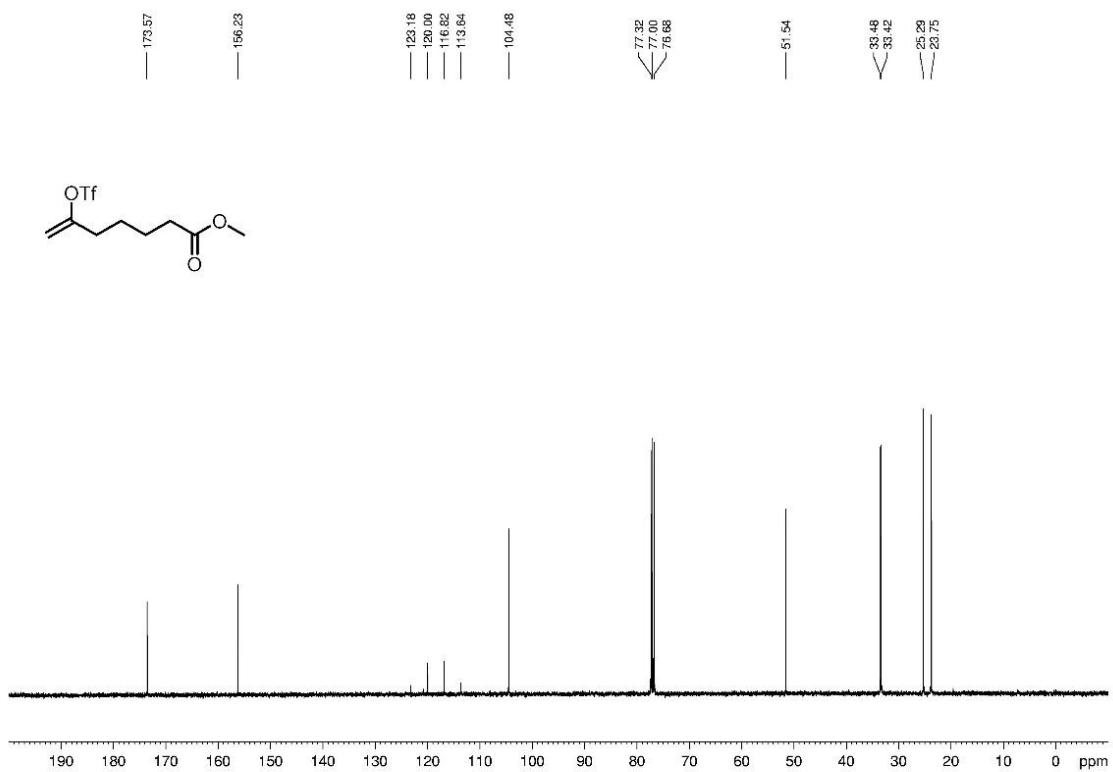

2p;  $^{19}\text{F}$  NMR (376MHz,  $\text{CDCl}_3$ )

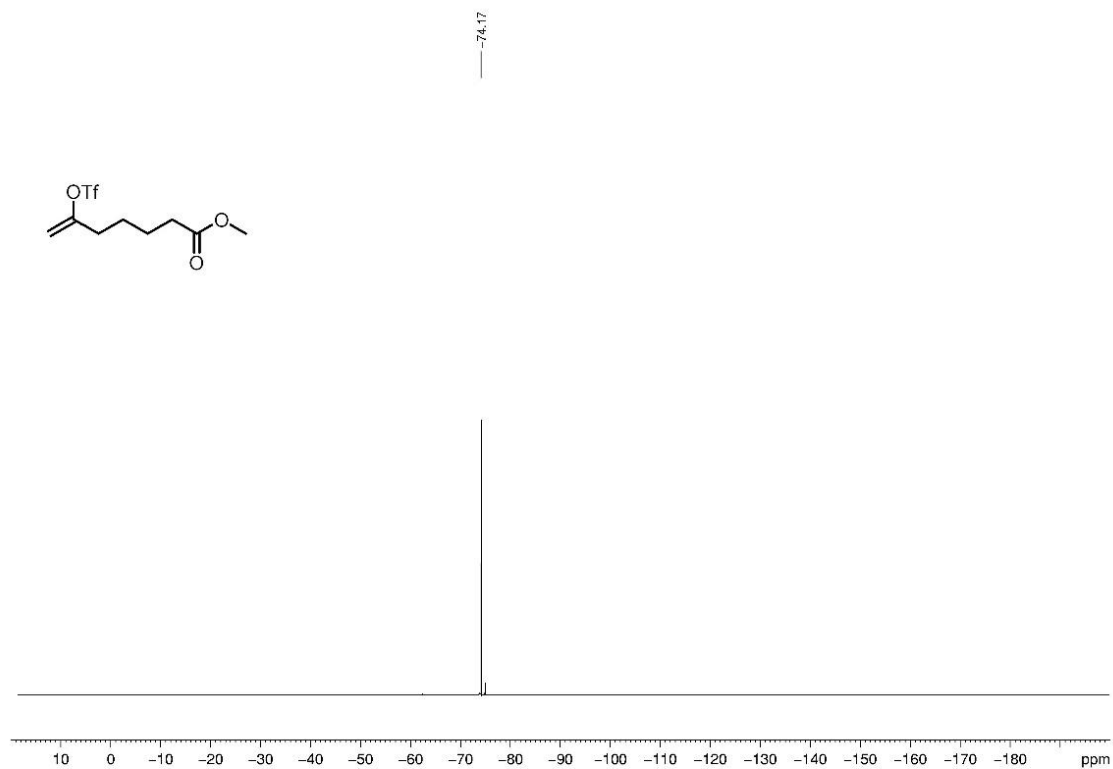

**2q;  $^1\text{H}$  NMR (400MHz,  $\text{CDCl}_3$ );  $^{13}\text{C}$  NMR (100MHz,  $\text{CDCl}_3$ )**

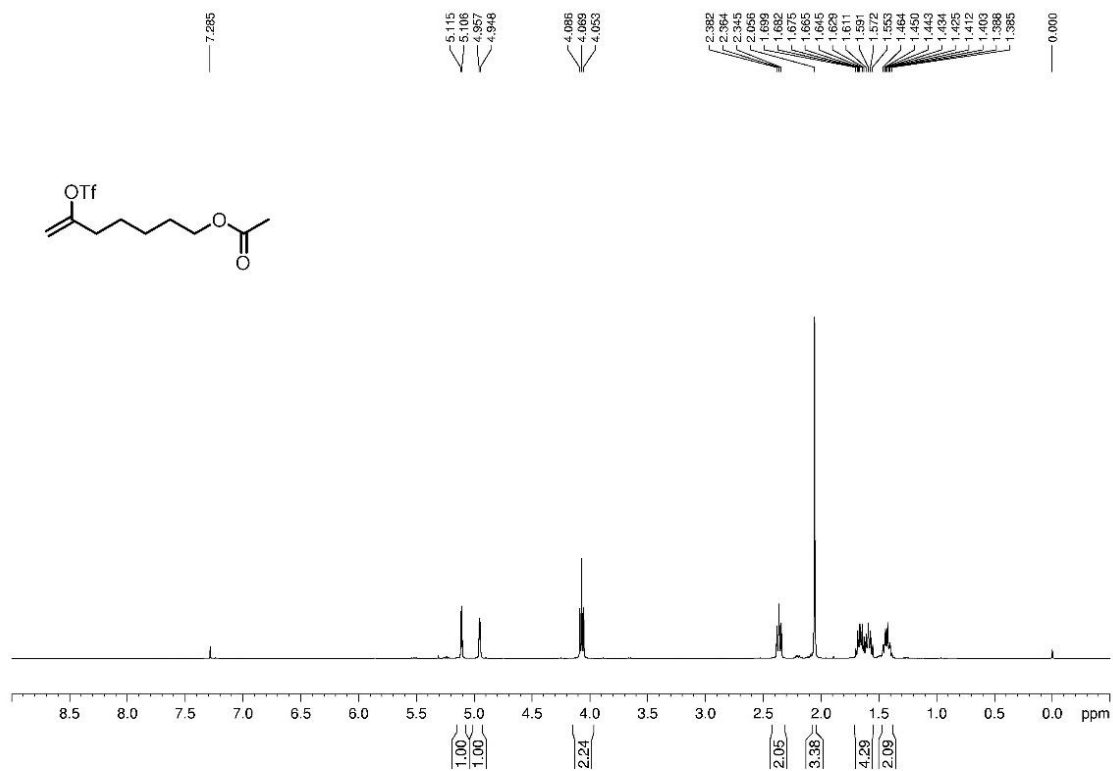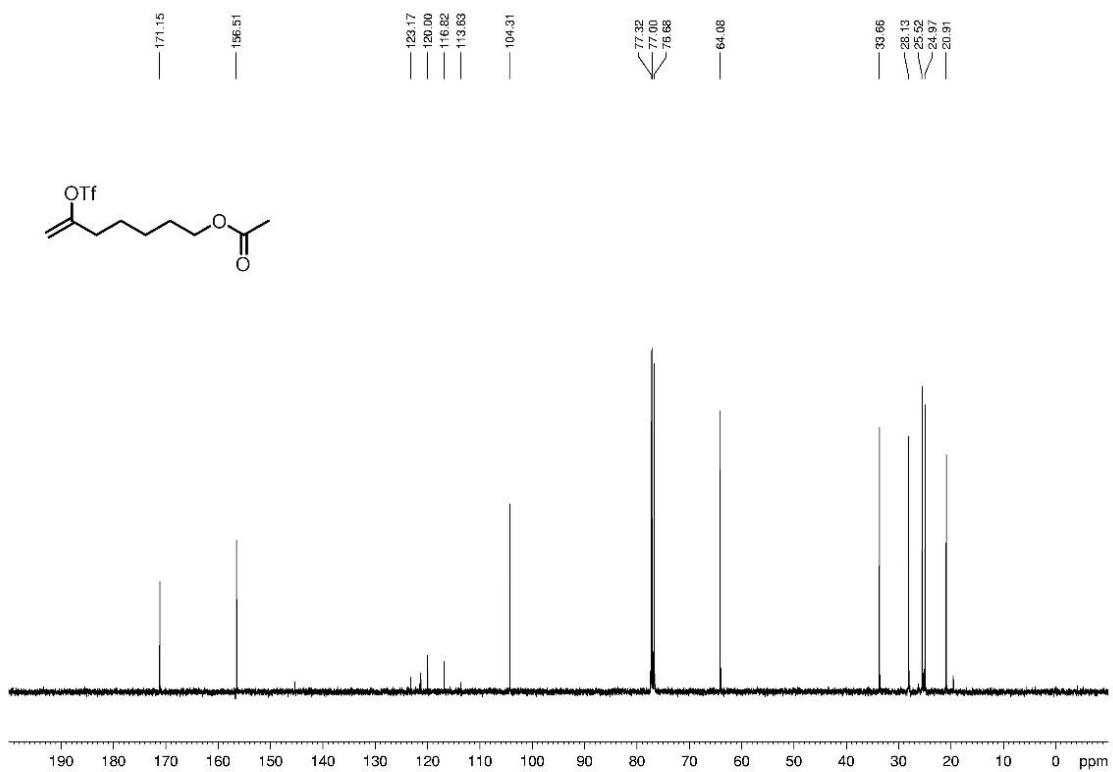

**2q;  $^{19}\text{F}$  NMR (376MHz,  $\text{CDCl}_3$ )**

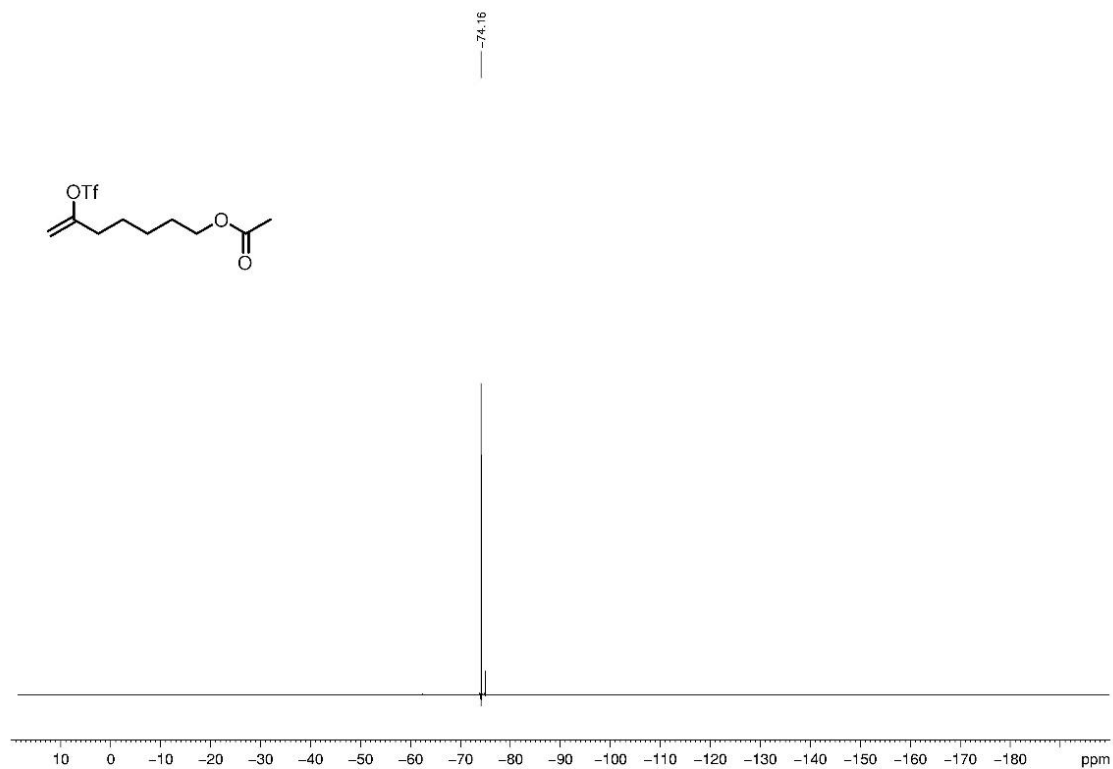

**2w-1;  $^1\text{H}$  NMR (400MHz,  $\text{CDCl}_3$ );  $^{13}\text{C}$  NMR (100MHz,  $\text{CDCl}_3$ )**

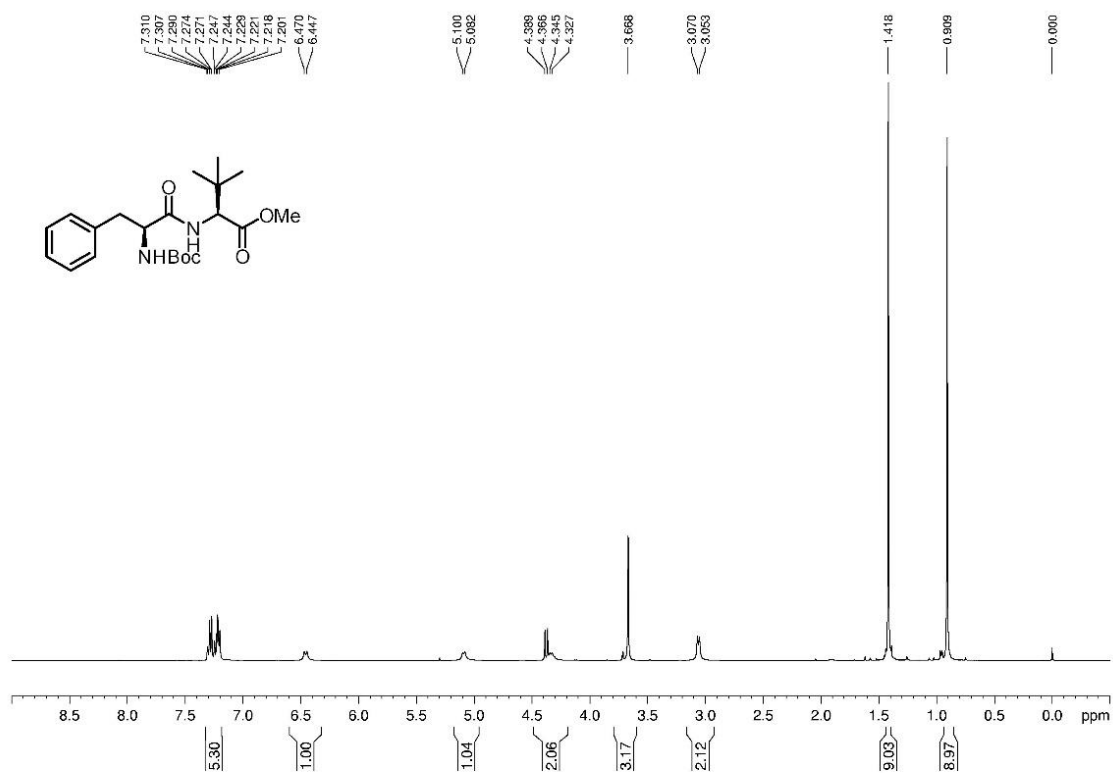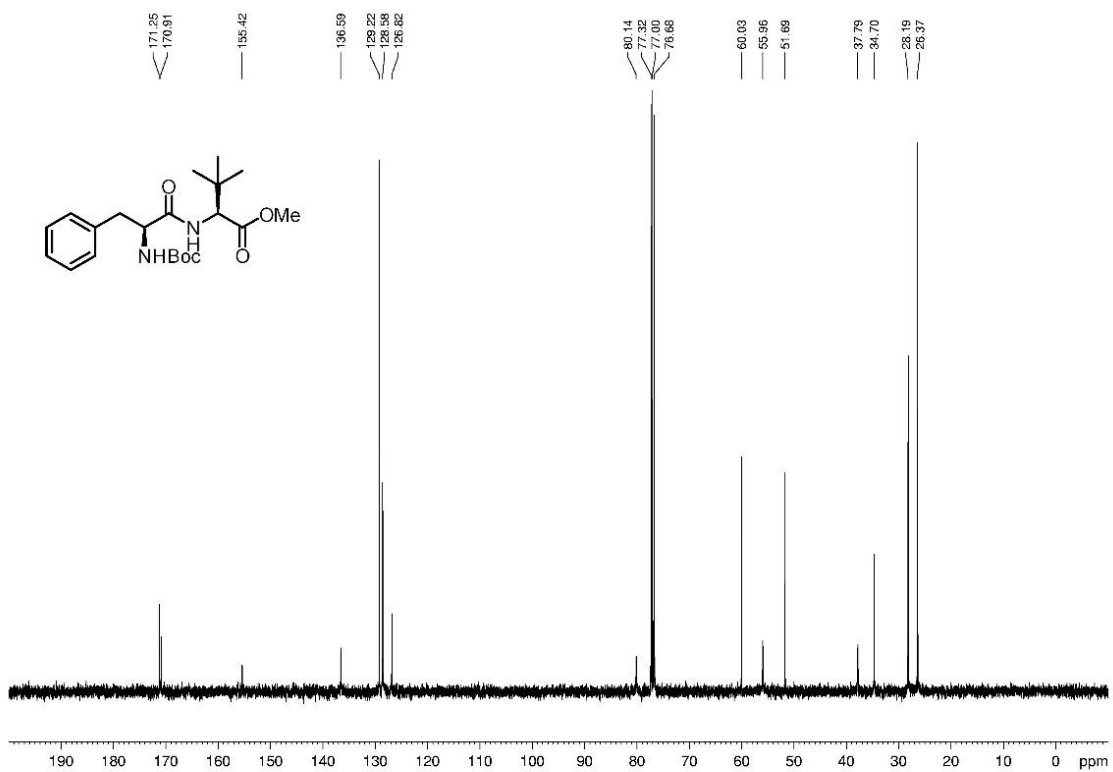

2w;  $^1\text{H}$  NMR (400MHz,  $\text{CDCl}_3$ );  $^{13}\text{C}$  NMR (100MHz,  $\text{CDCl}_3$ )

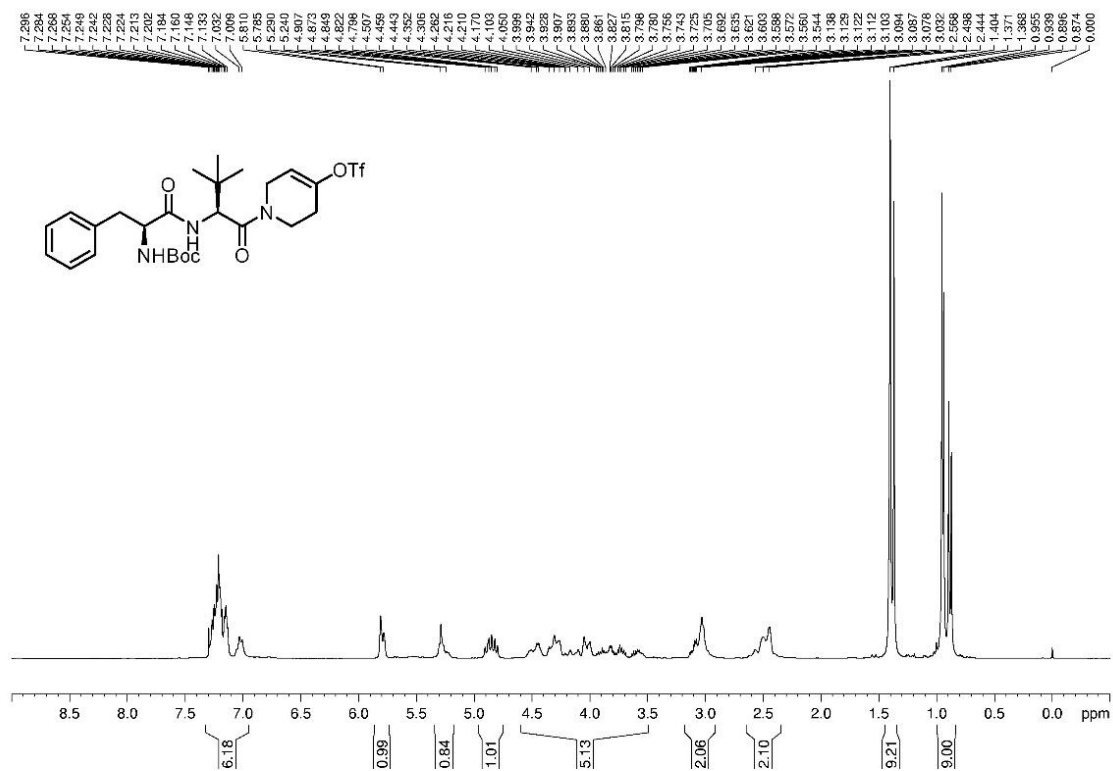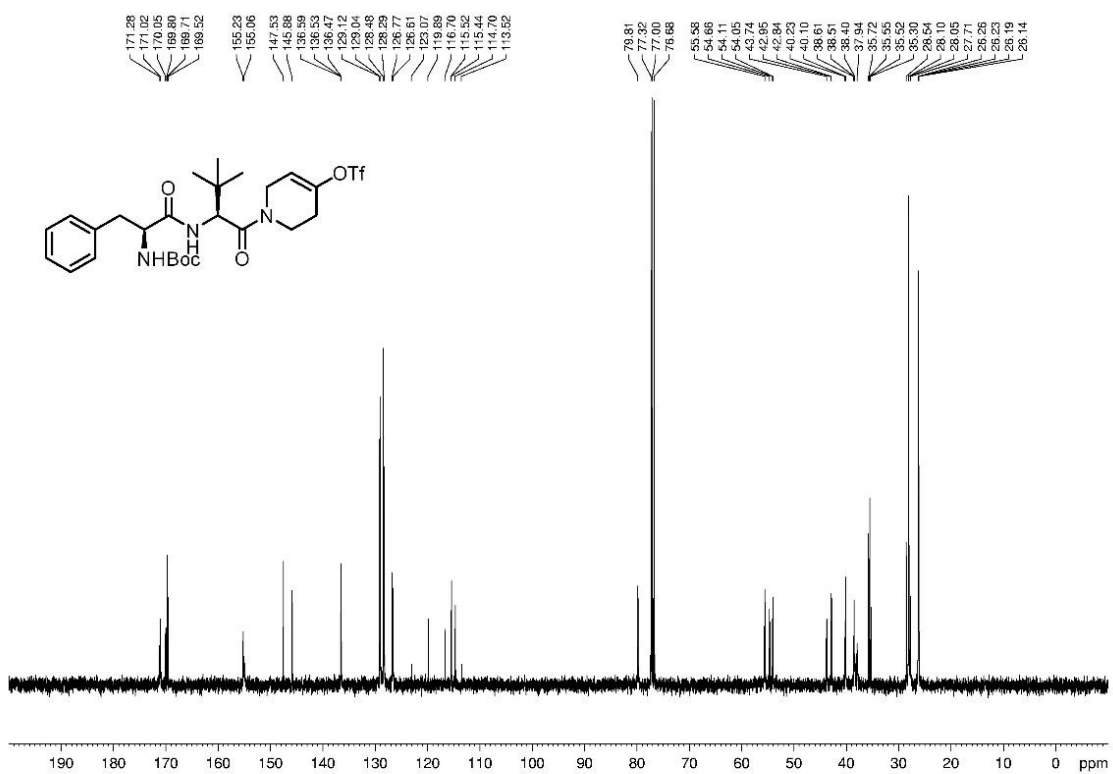

**2w;  $^{19}\text{F}$  NMR (376MHz,  $\text{CDCl}_3$ )**

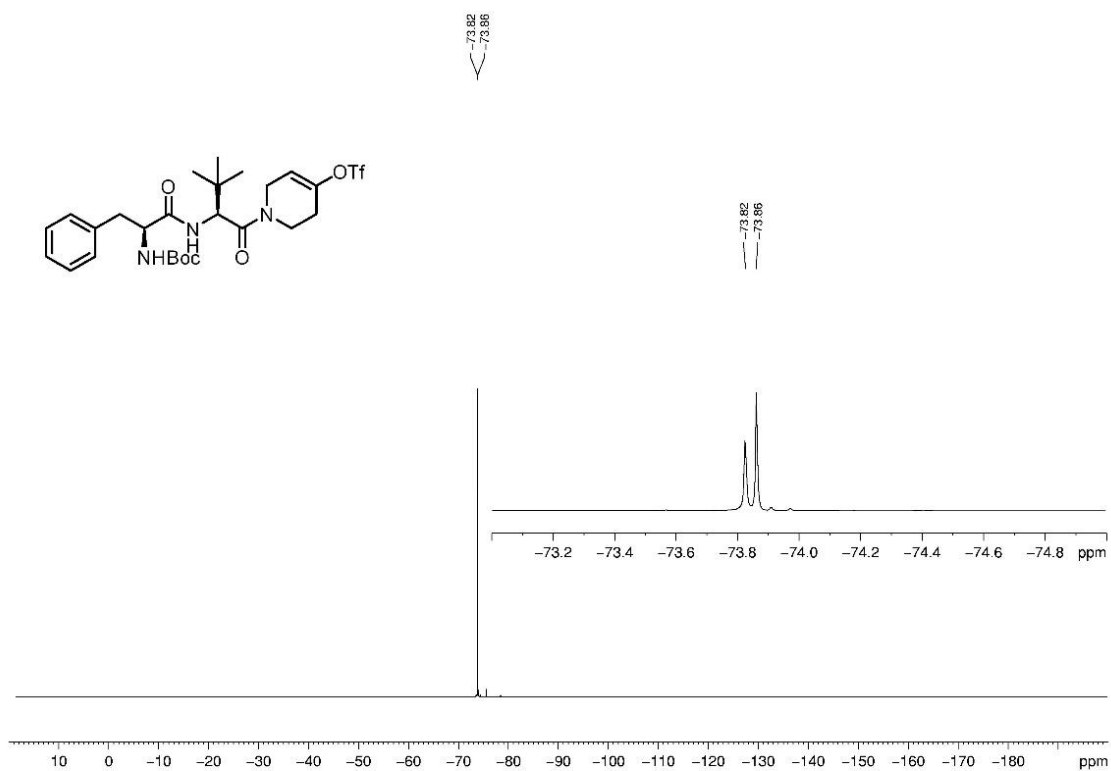



2x-1;  $^1\text{H}$  NMR (400MHz,  $\text{CDCl}_3$ );  $^{13}\text{C}$  NMR (100MHz,  $\text{CDCl}_3$ )

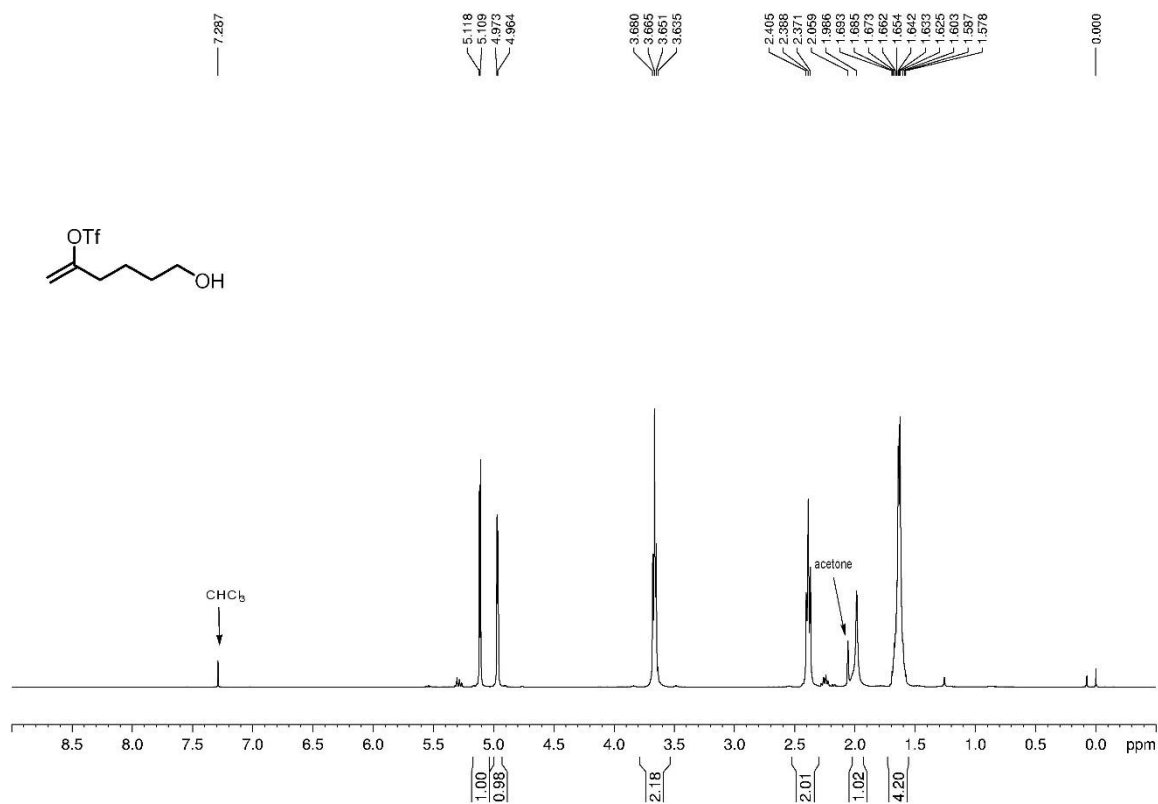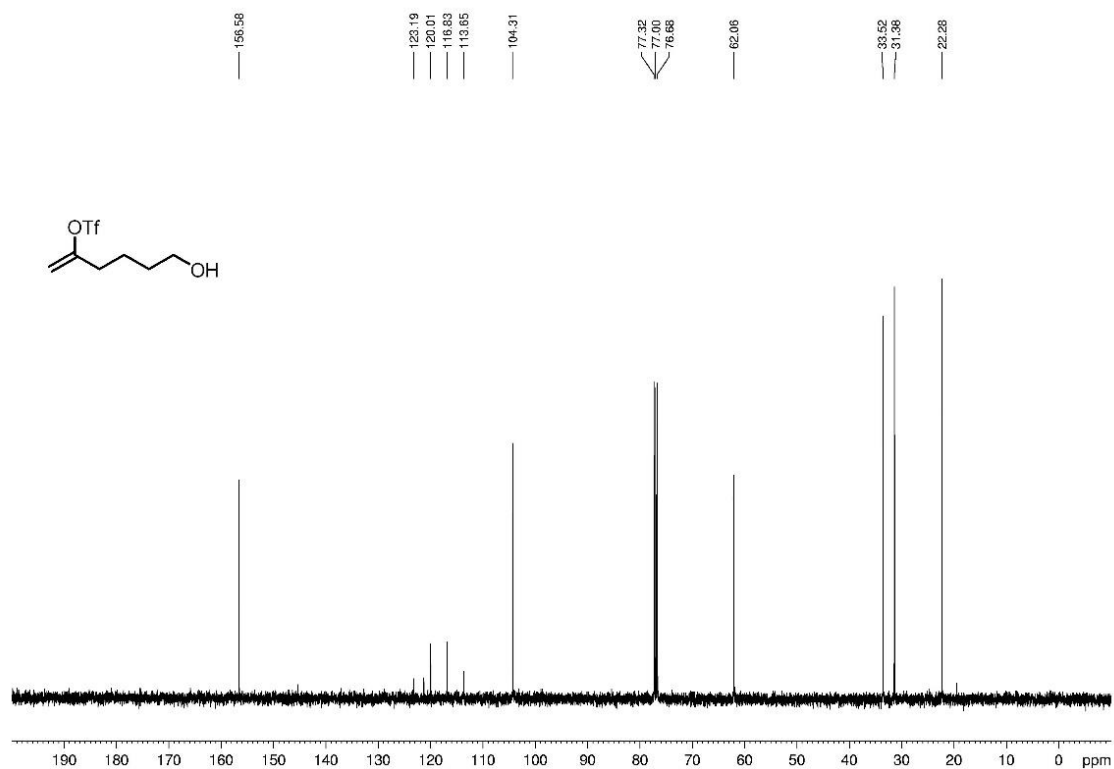

2x-1;  $^{19}\text{F}$  NMR (376MHz,  $\text{CDCl}_3$ )

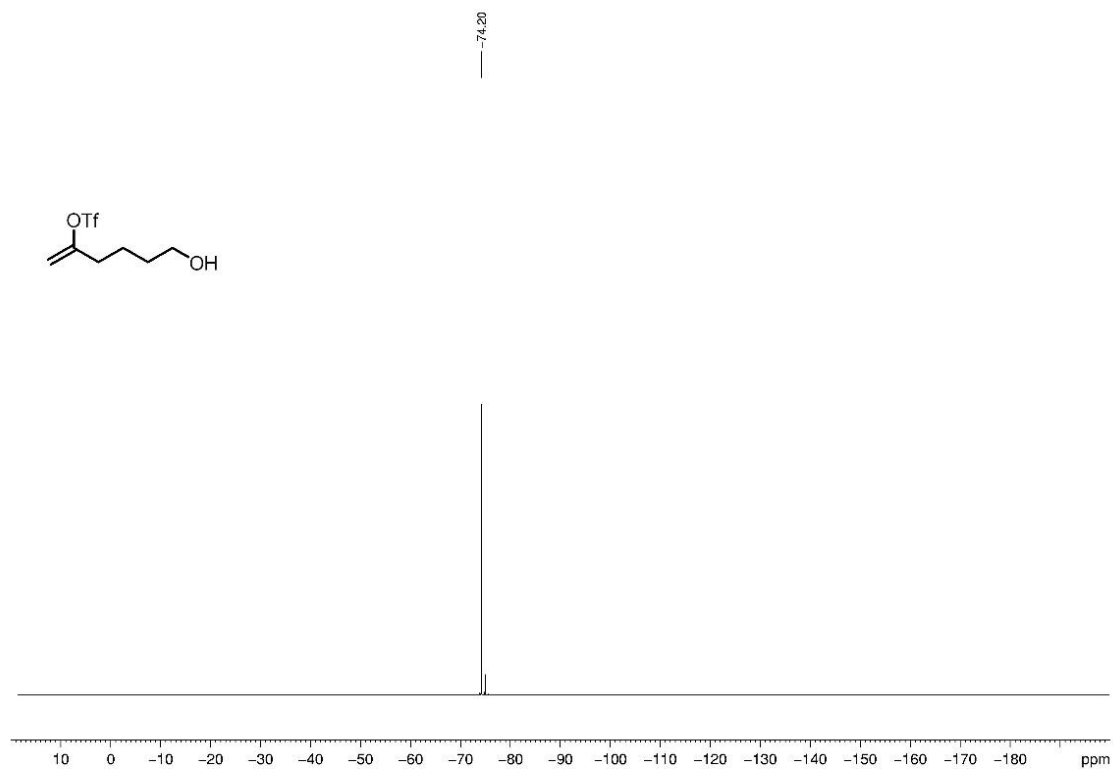

**2x;  $^1\text{H}$  NMR (400MHz,  $\text{CDCl}_3$ );  $^{13}\text{C}$  NMR (100MHz,  $\text{CDCl}_3$ )**

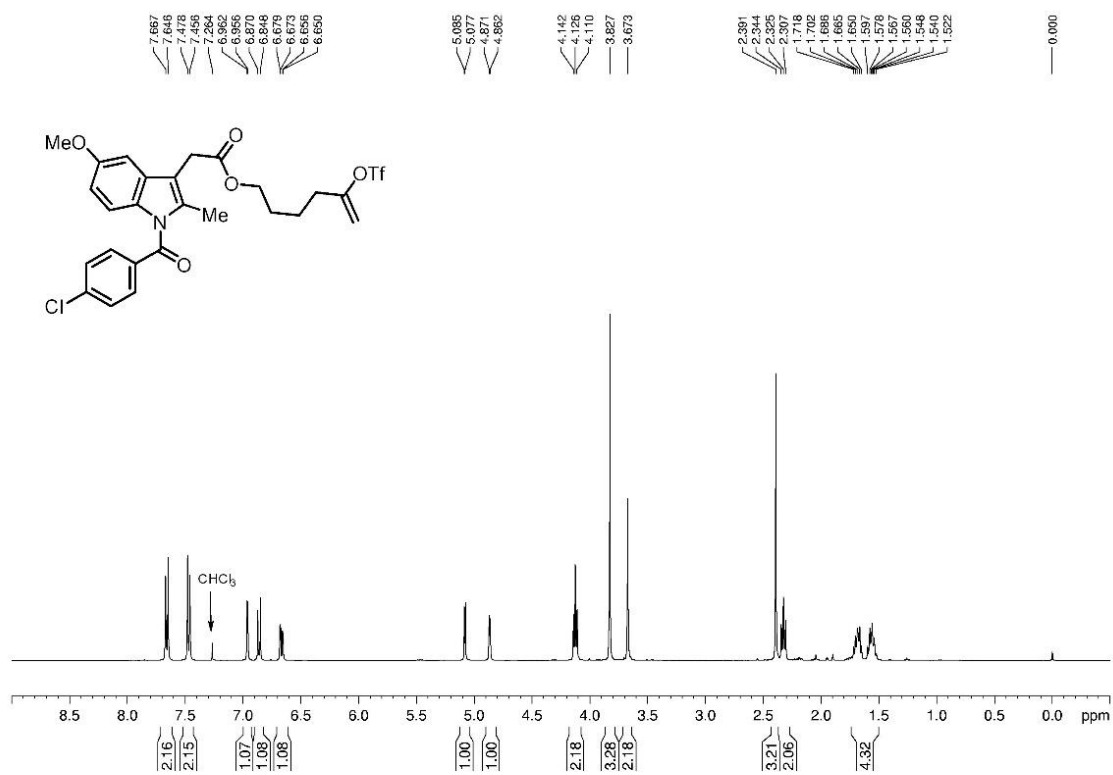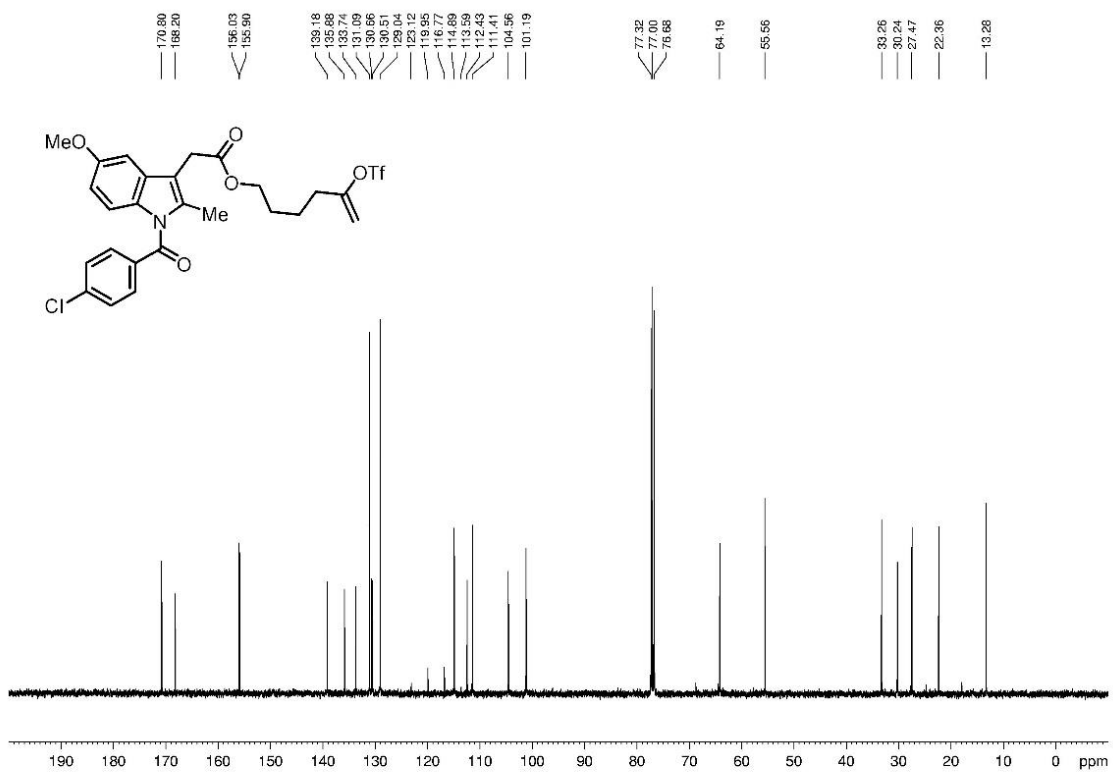

**2x;  $^{19}\text{F}$  NMR (376MHz,  $\text{CDCl}_3$ )**

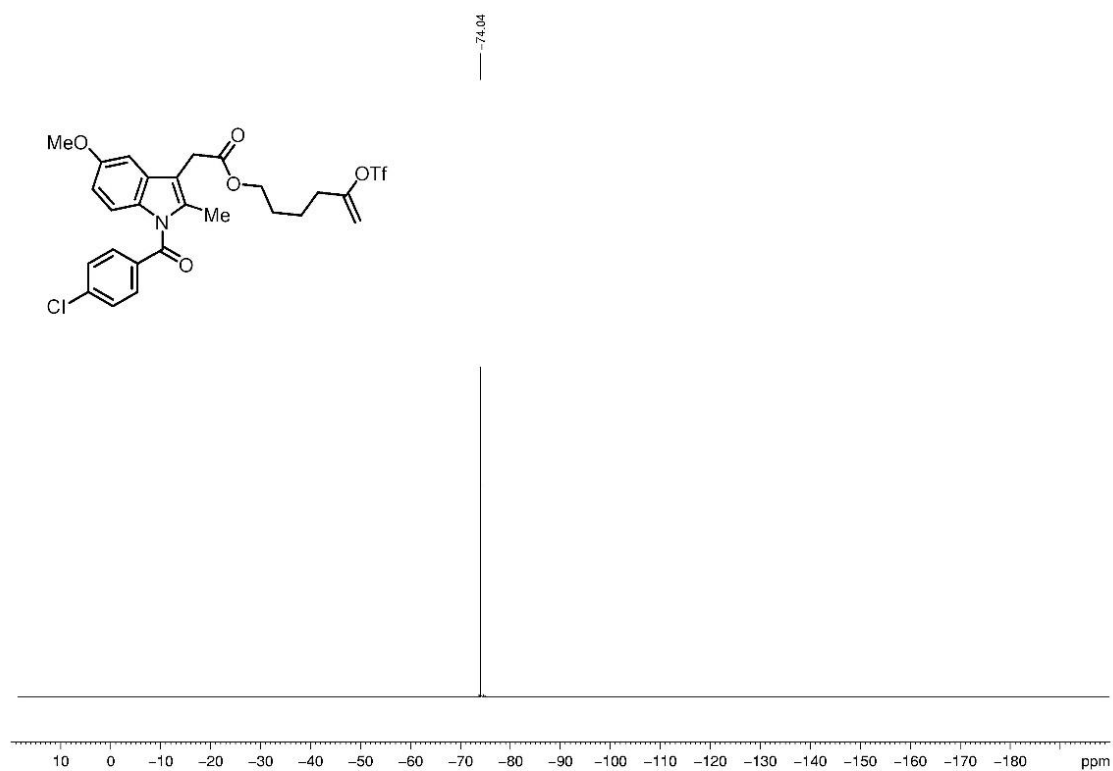

**2y;  $^1\text{H}$  NMR (600MHz,  $\text{CDCl}_3$ );  $^{13}\text{C}$  NMR (150MHz,  $\text{CDCl}_3$ )**

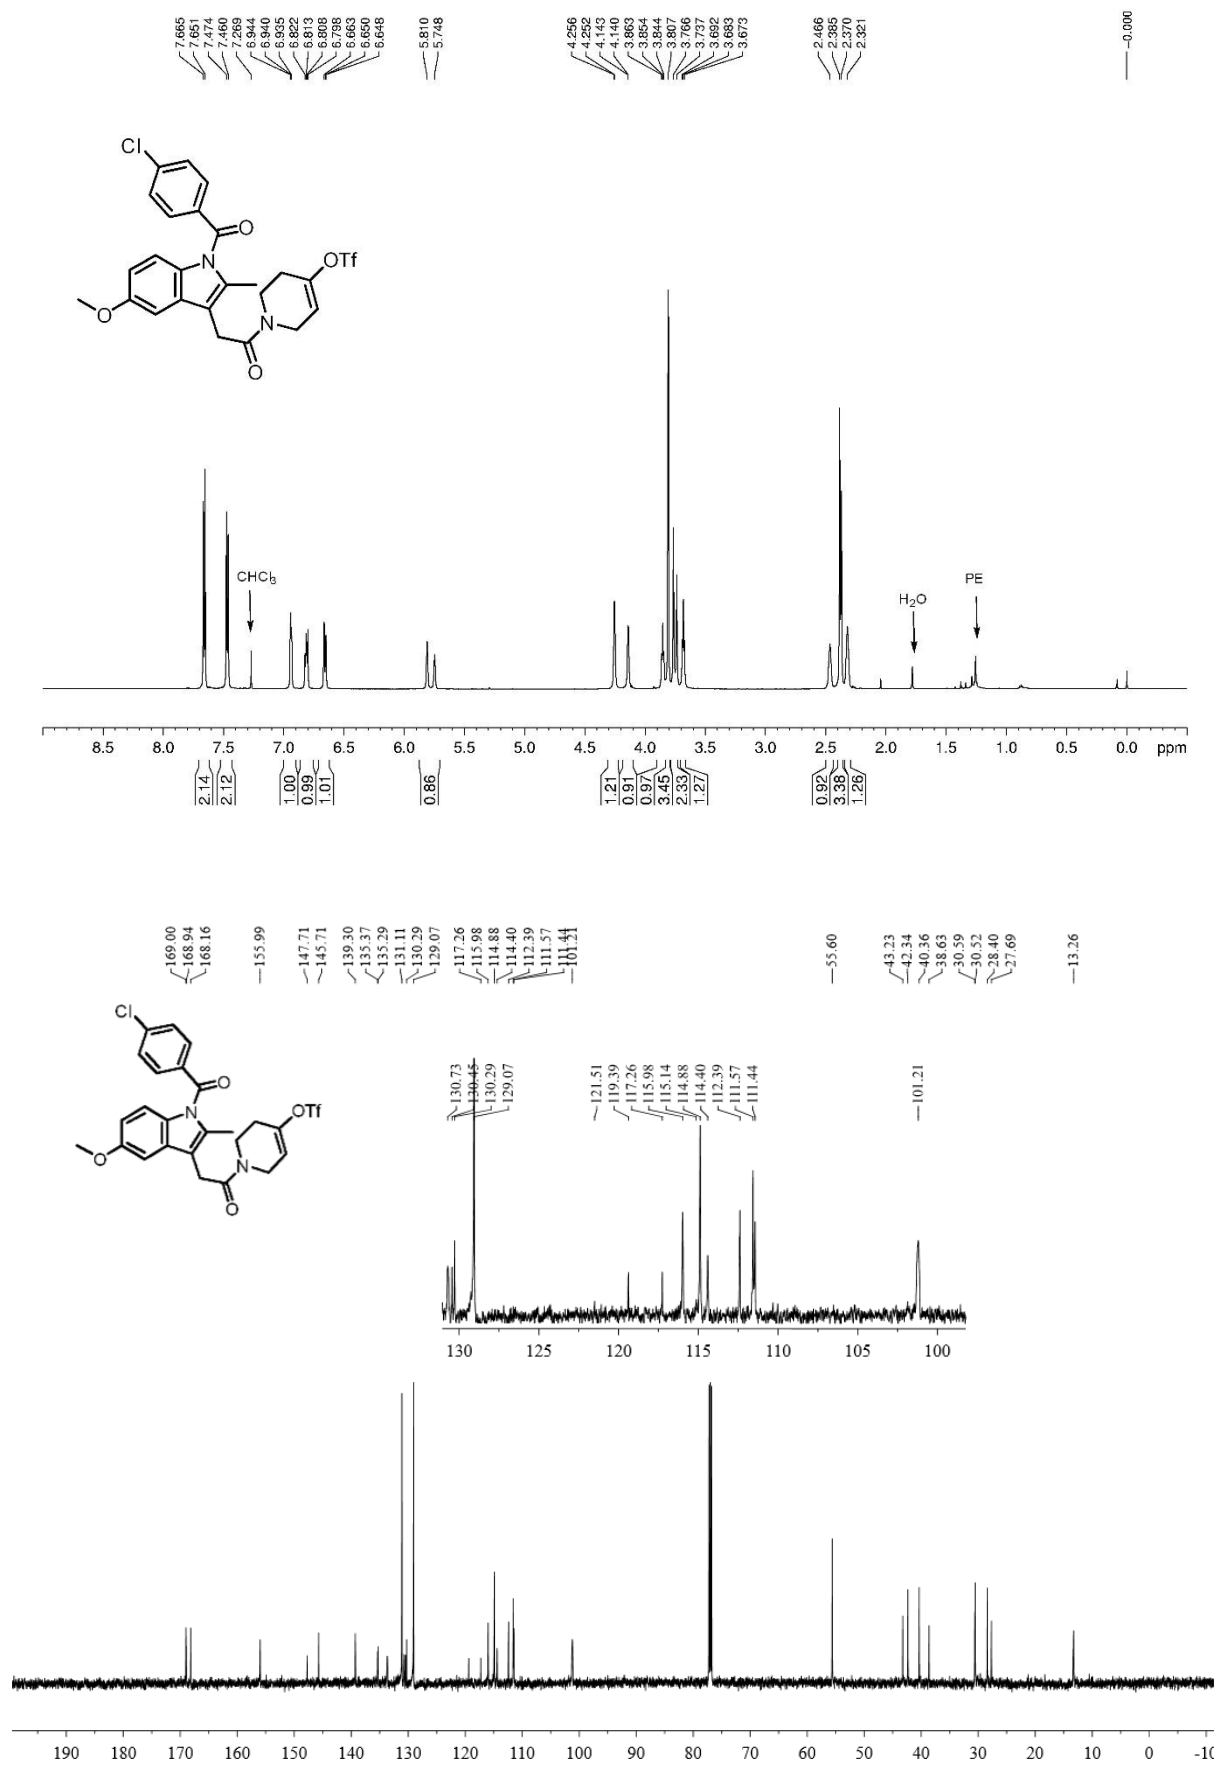

**2y;  $^{19}\text{F}$  NMR (376MHz,  $\text{CDCl}_3$ )**

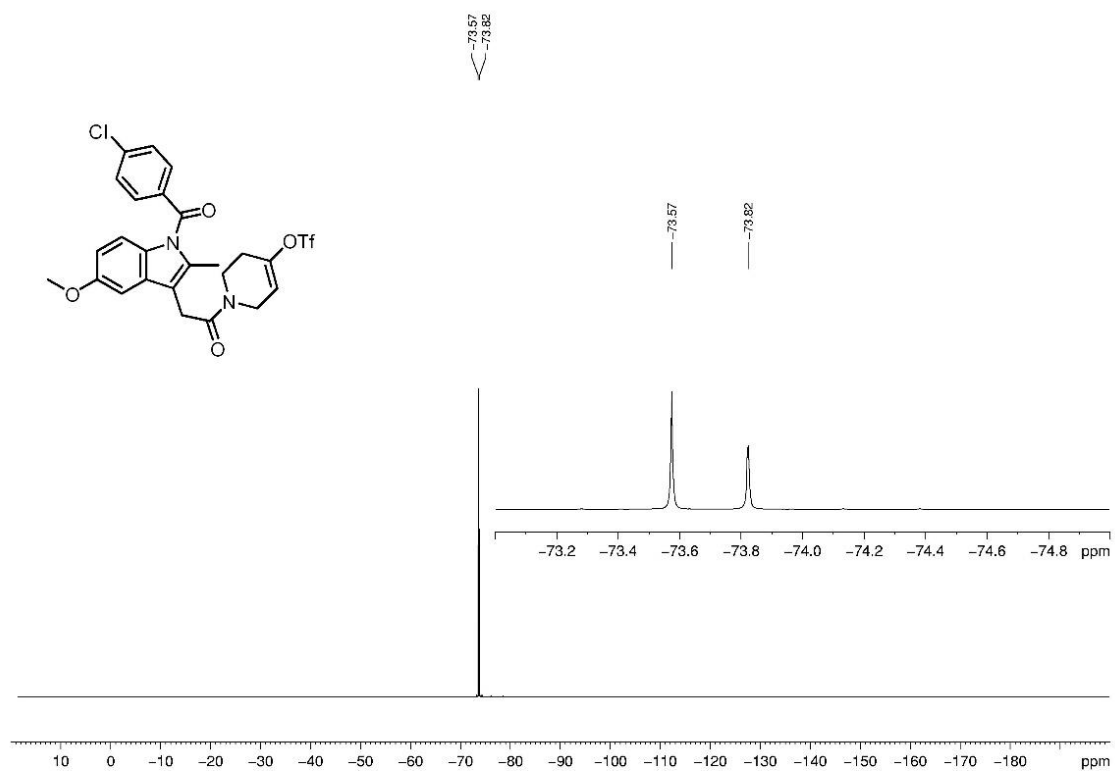

**3a;  $^1\text{H}$  NMR (400MHz,  $\text{CDCl}_3$ );  $^{13}\text{C}$  NMR (100MHz,  $\text{CDCl}_3$ )**

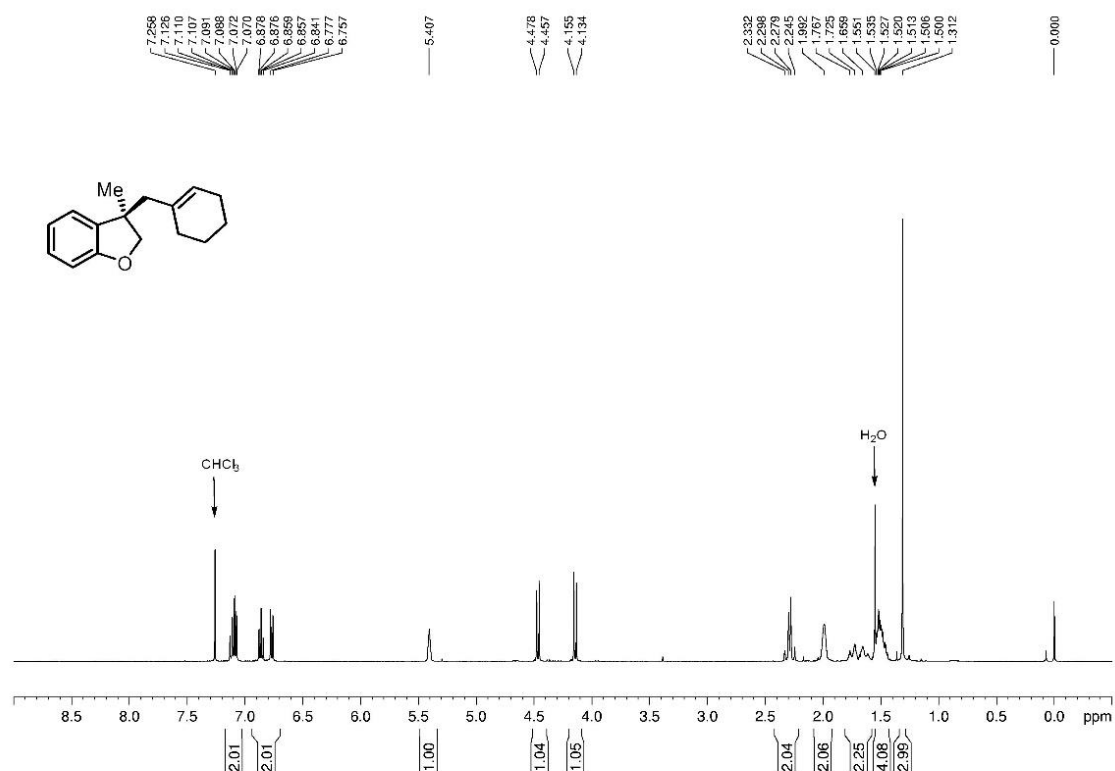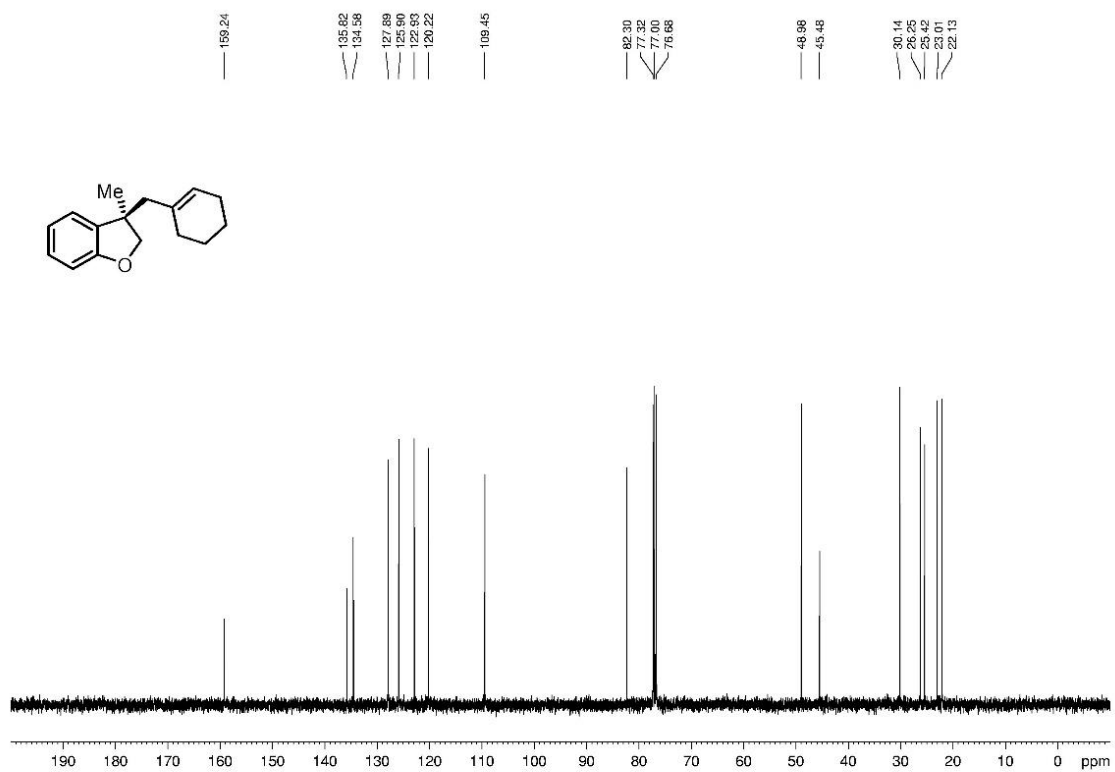

**3b;  $^1\text{H}$  NMR (400MHz,  $\text{CDCl}_3$ );  $^{13}\text{C}$  NMR (100MHz,  $\text{CDCl}_3$ )**

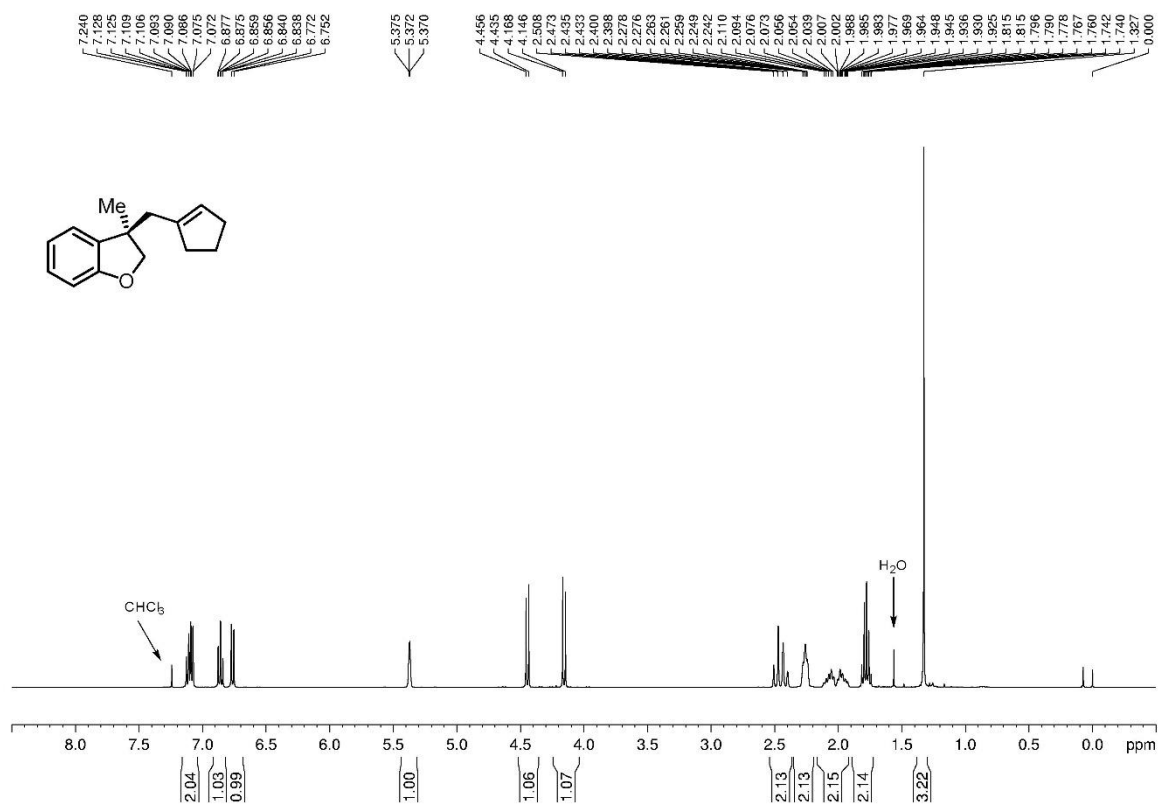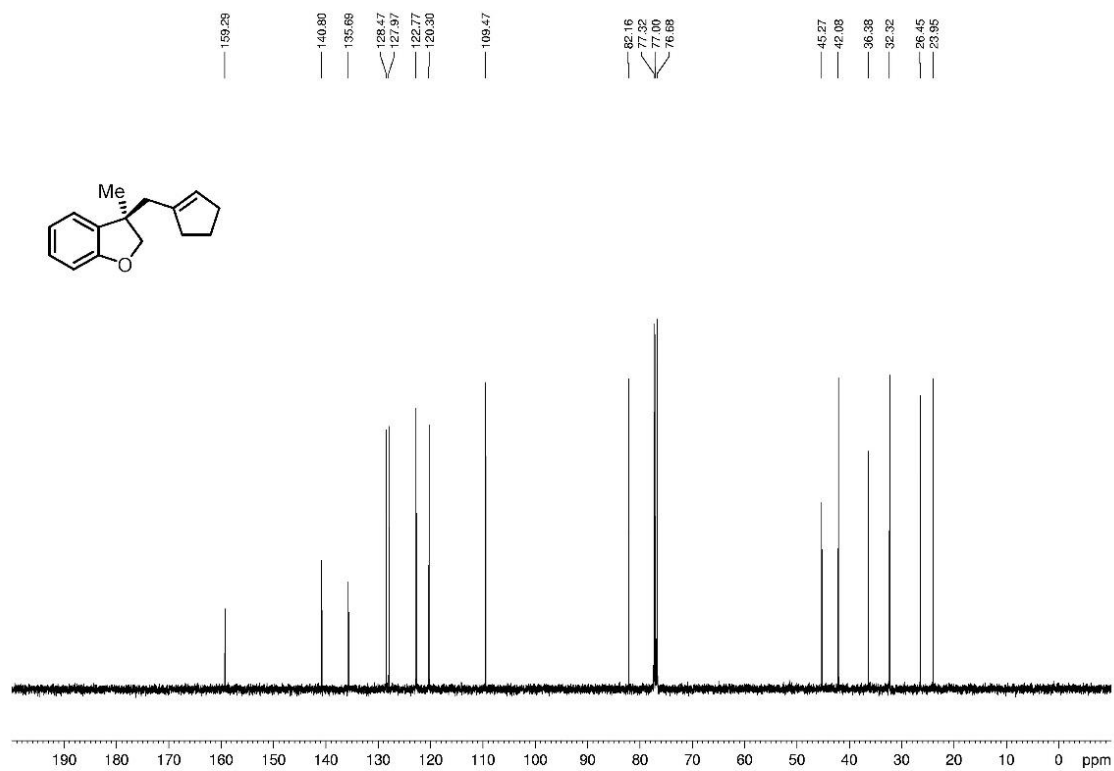



**3c;  $^1\text{H}$  NMR (400MHz,  $\text{CDCl}_3$ );  $^{13}\text{C}$  NMR (100MHz,  $\text{CDCl}_3$ )**

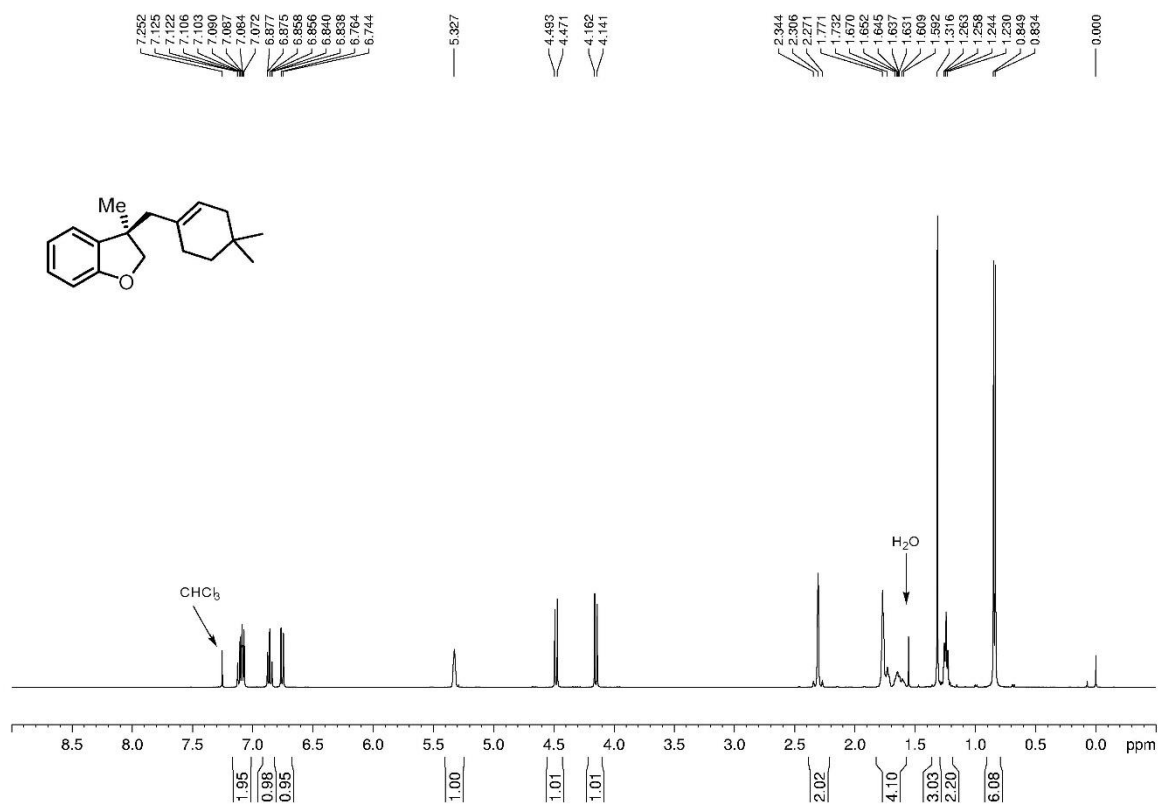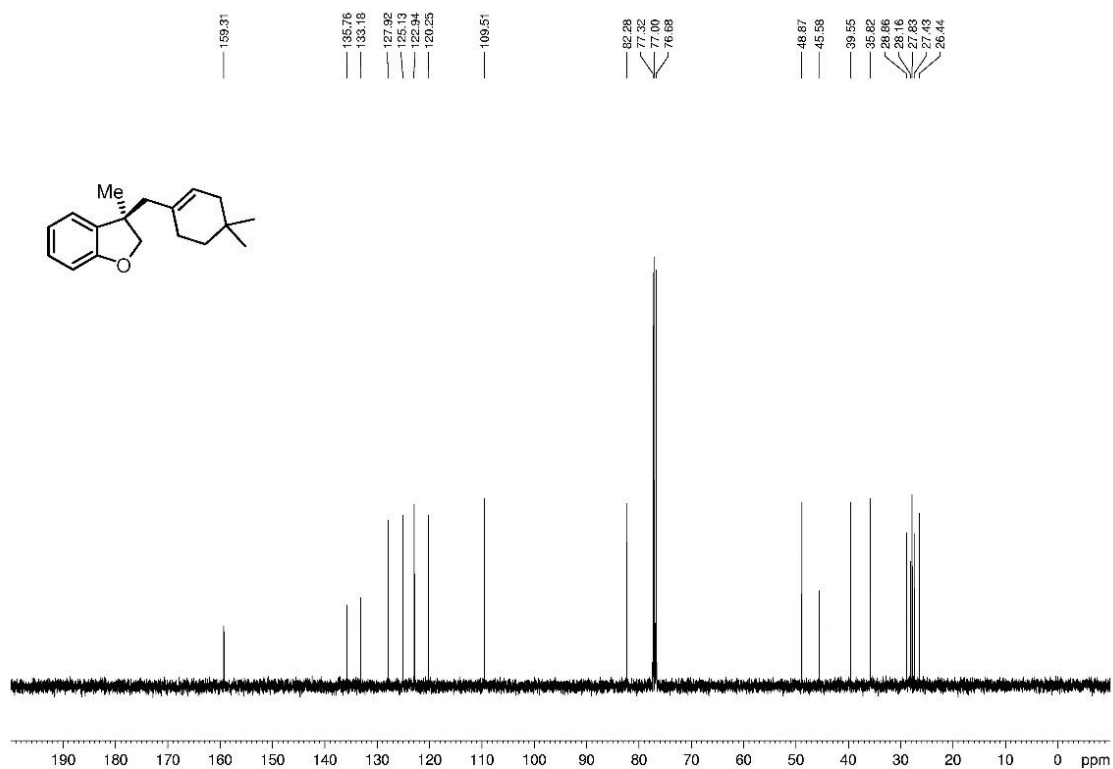

**3d;  $^1\text{H}$  NMR (400MHz,  $\text{CDCl}_3$ );  $^{13}\text{C}$  NMR (100MHz,  $\text{CDCl}_3$ )**

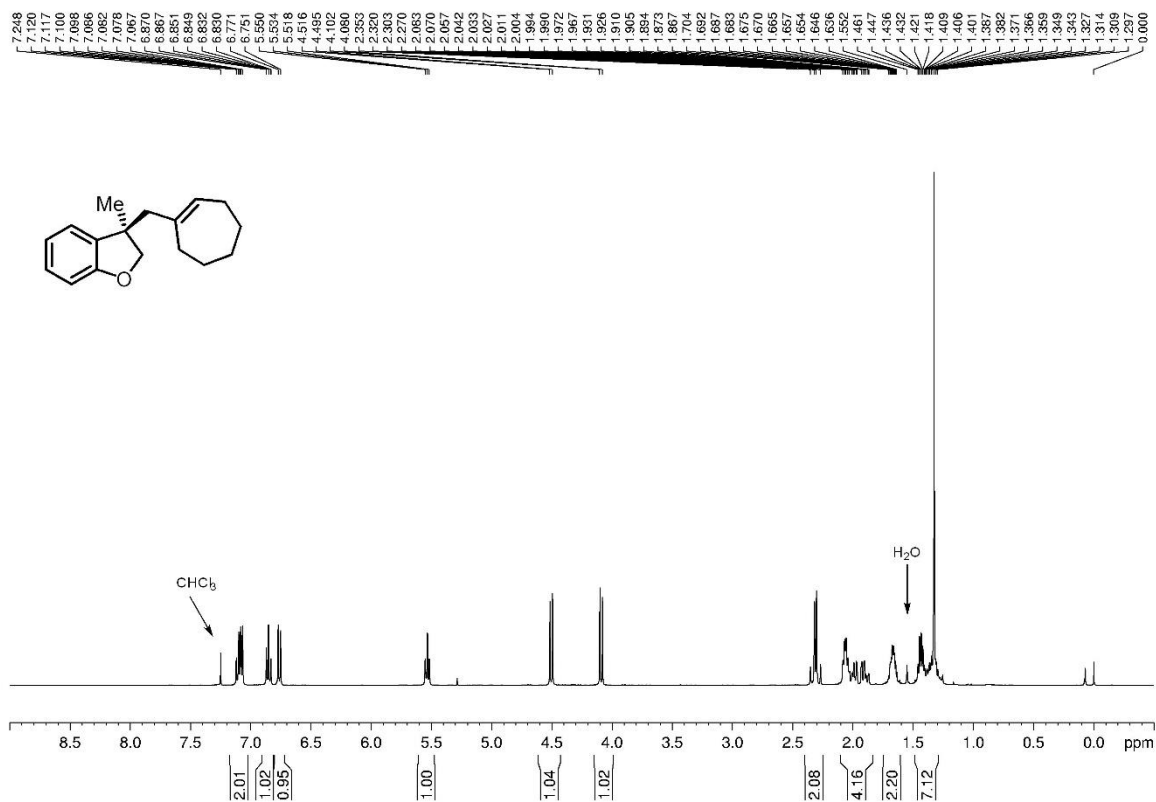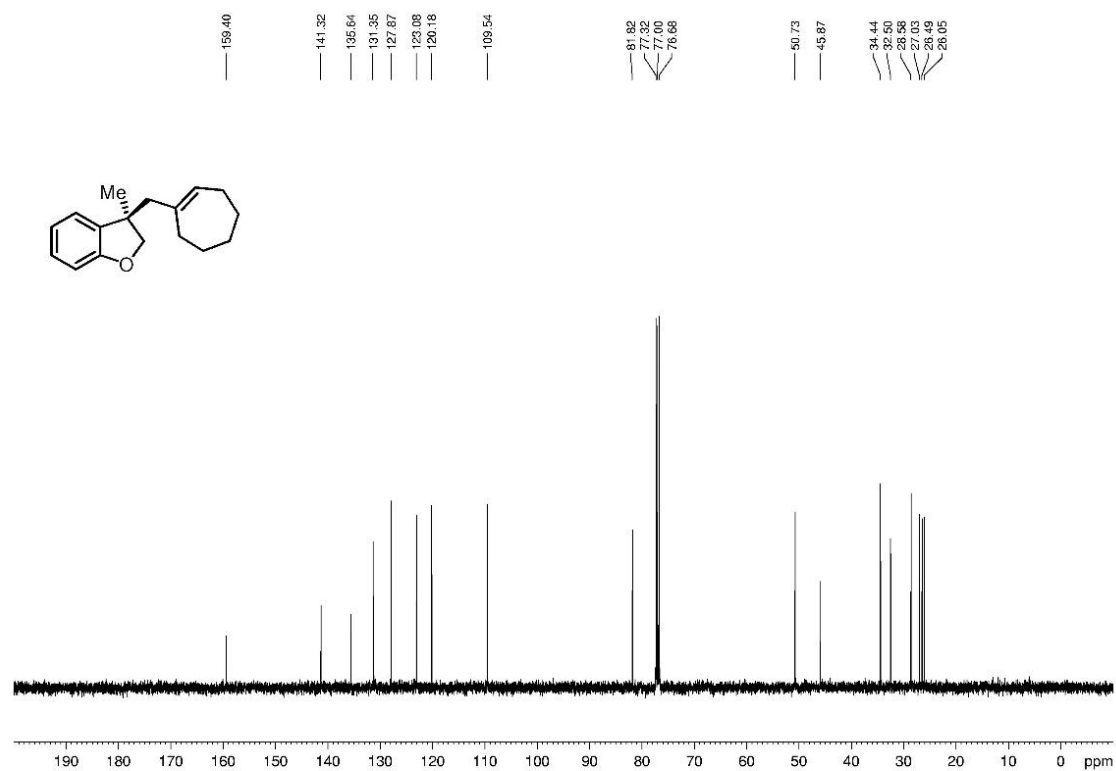

**3e;  $^1\text{H}$  NMR (400MHz,  $\text{CDCl}_3$ );  $^{13}\text{C}$  NMR (100MHz,  $\text{CDCl}_3$ )**

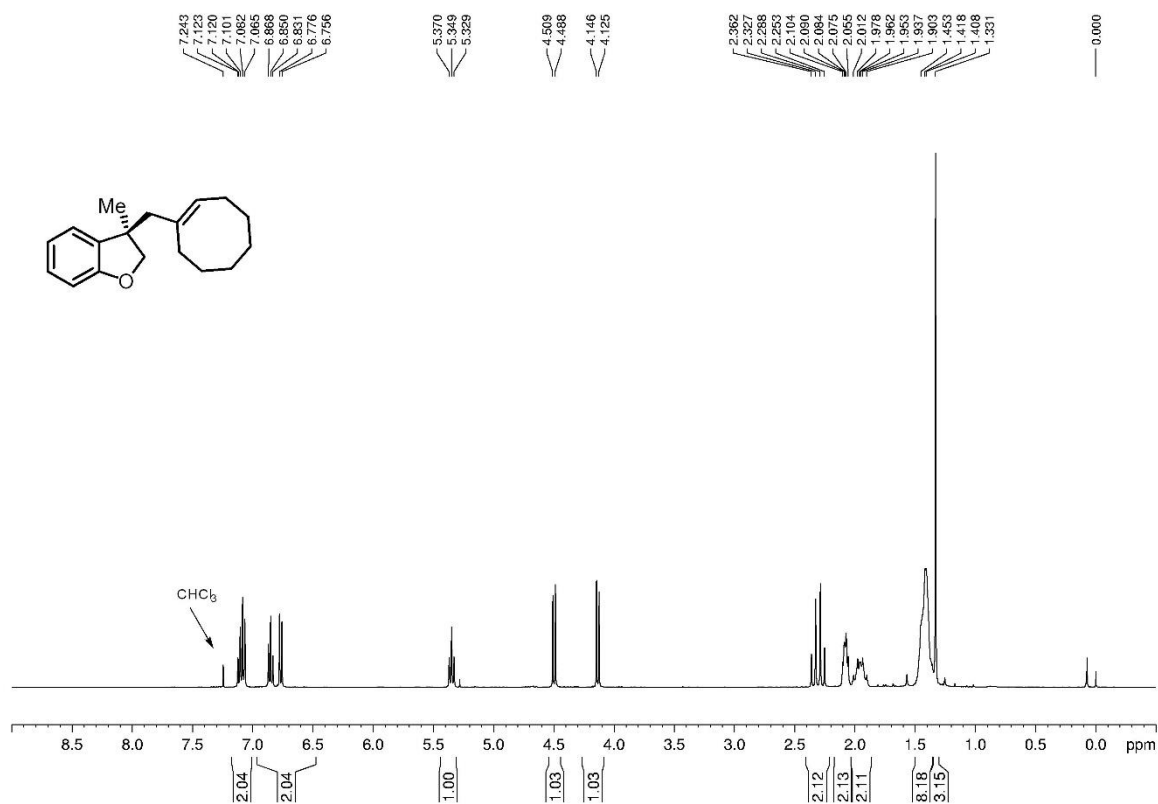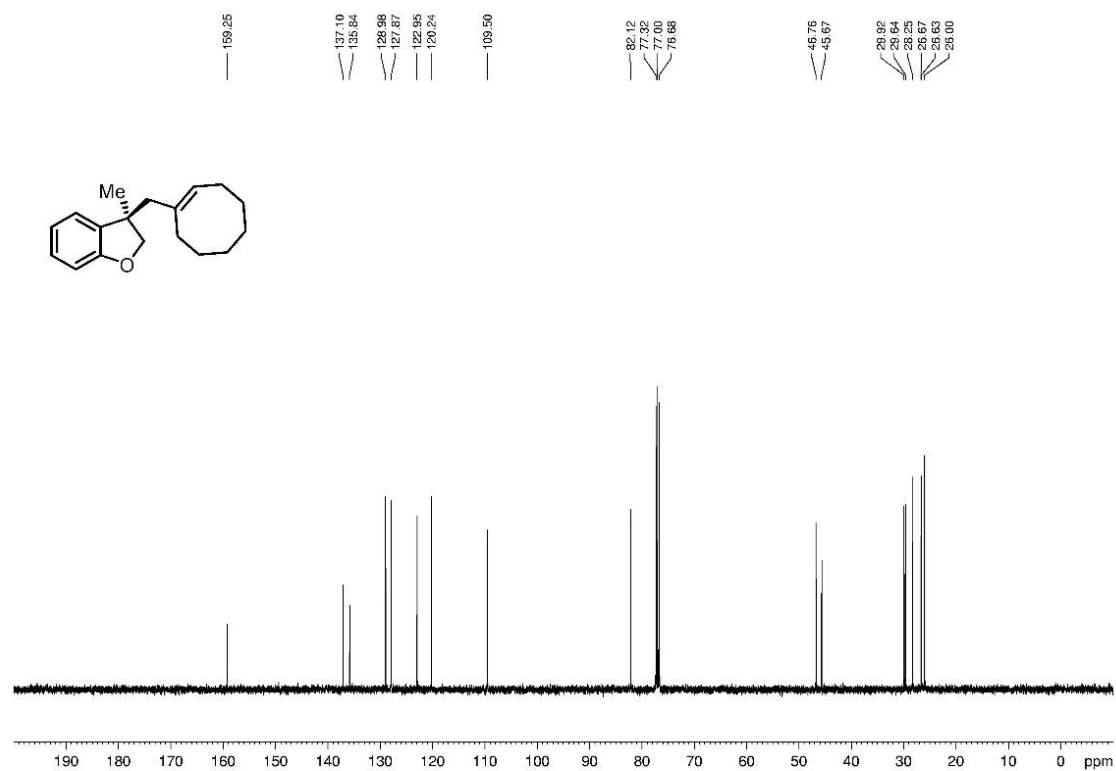

**3f; <sup>1</sup>H NMR (400MHz, CDCl<sub>3</sub>); <sup>13</sup>C NMR (100MHz, CDCl<sub>3</sub>)**

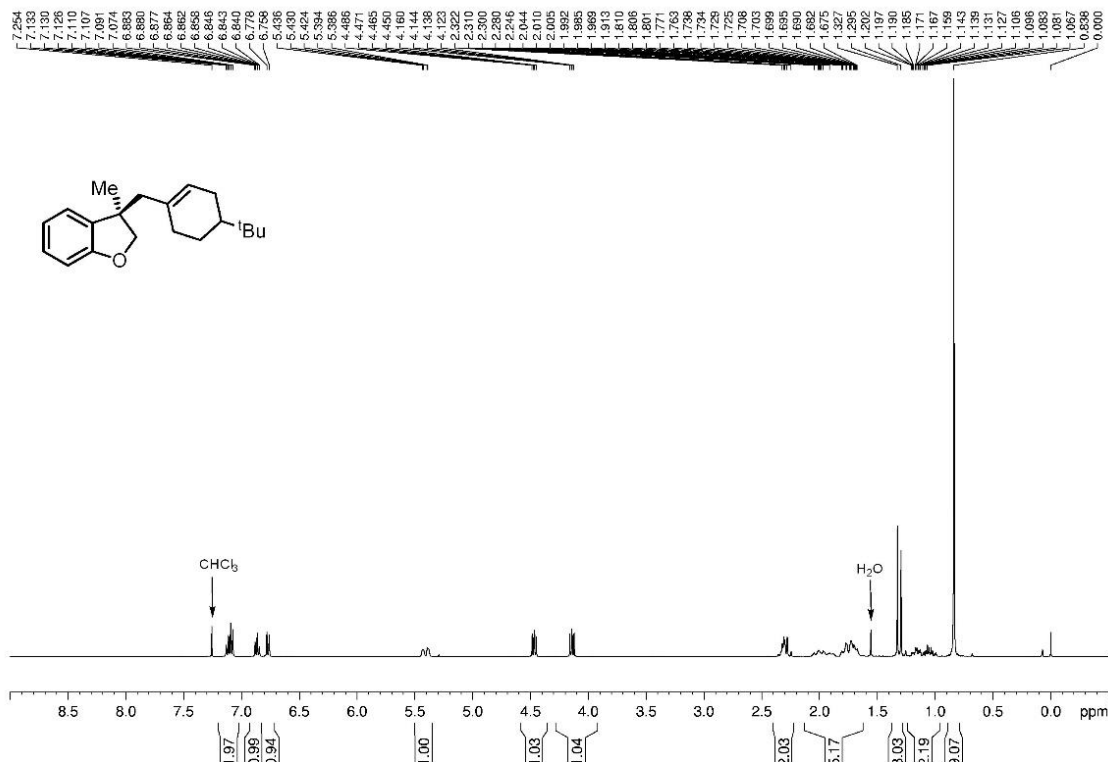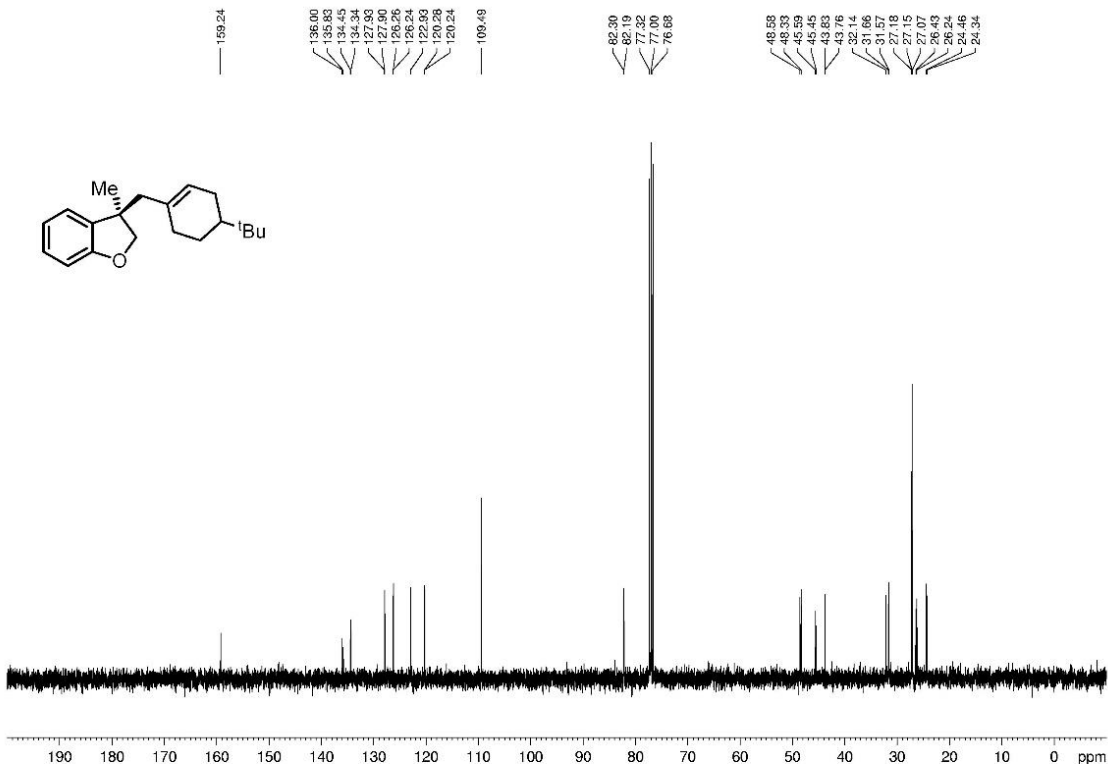

**3g;  $^1\text{H}$  NMR (400MHz,  $\text{CDCl}_3$ );  $^{13}\text{C}$  NMR (100MHz,  $\text{CDCl}_3$ )**

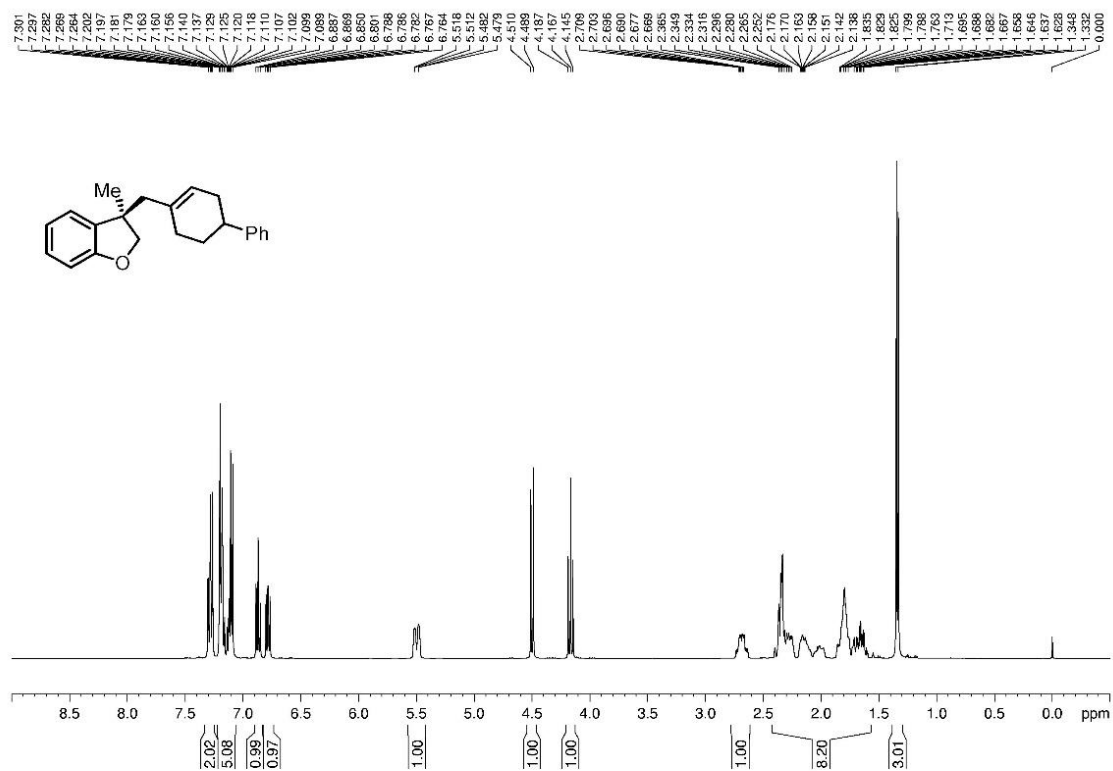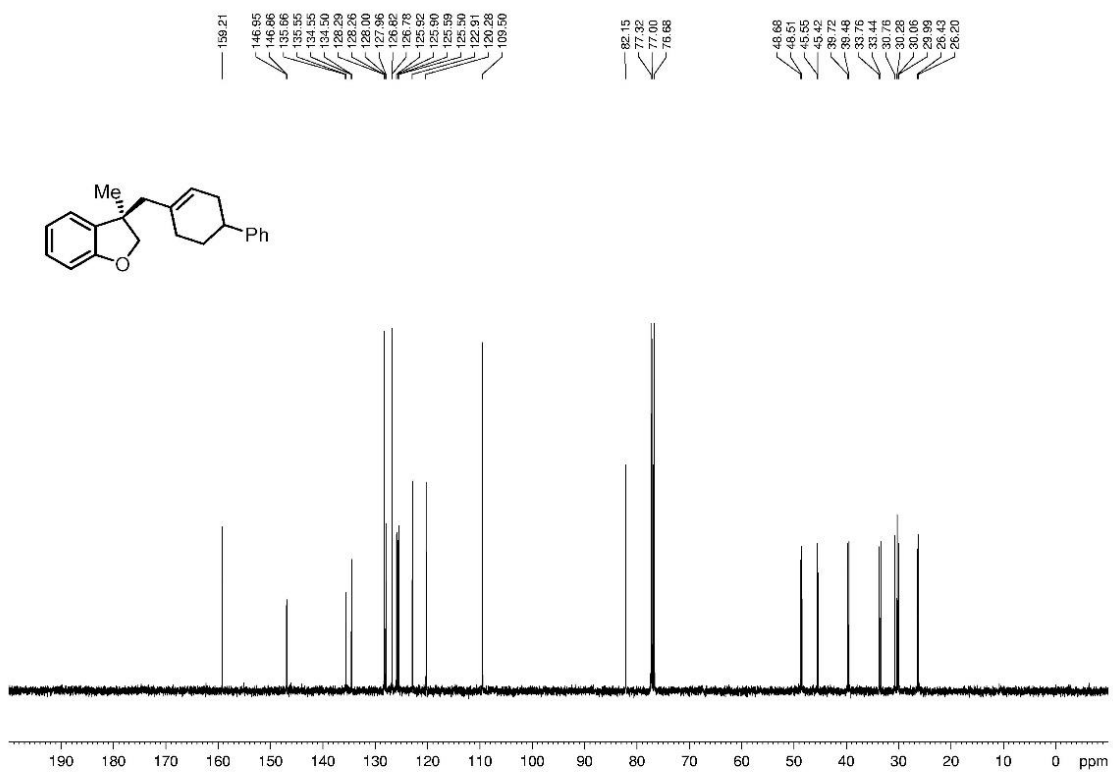

**3h;  $^1\text{H}$  NMR (400MHz,  $\text{CDCl}_3$ );  $^{13}\text{C}$  NMR (100MHz,  $\text{CDCl}_3$ )**

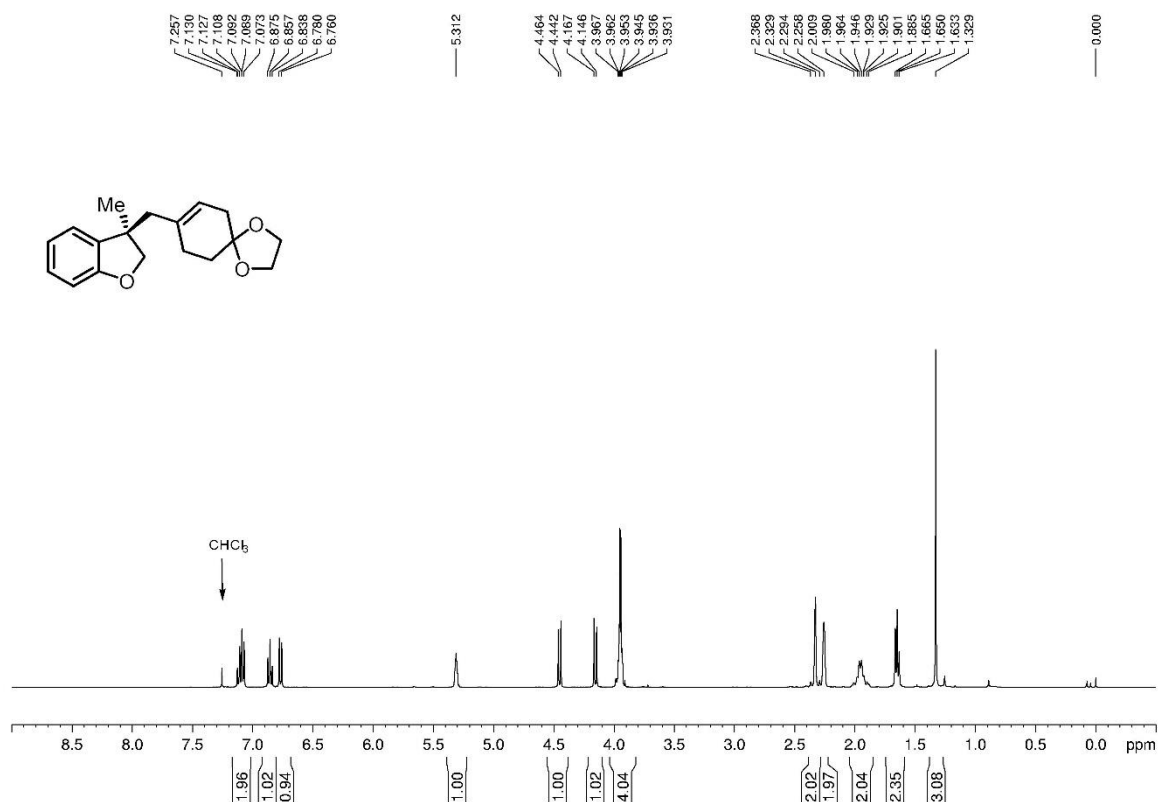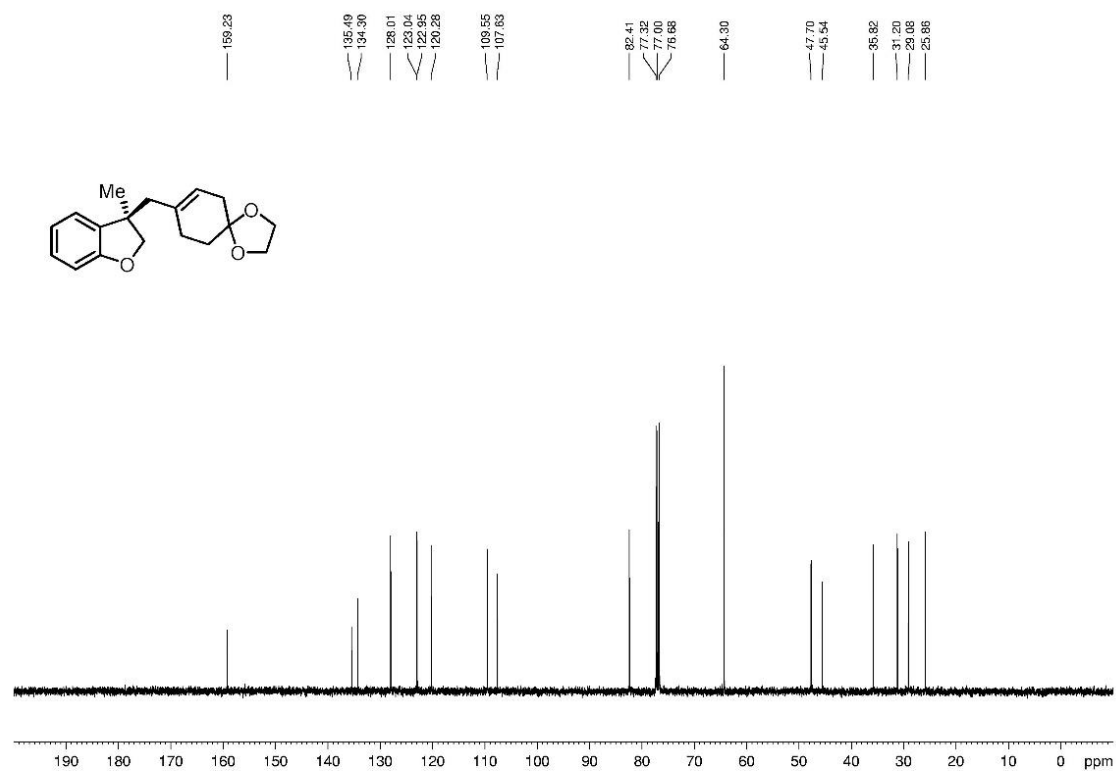

**3i;  $^1\text{H}$  NMR (400MHz,  $\text{CDCl}_3$ );  $^{13}\text{C}$  NMR (100MHz,  $\text{CDCl}_3$ )**

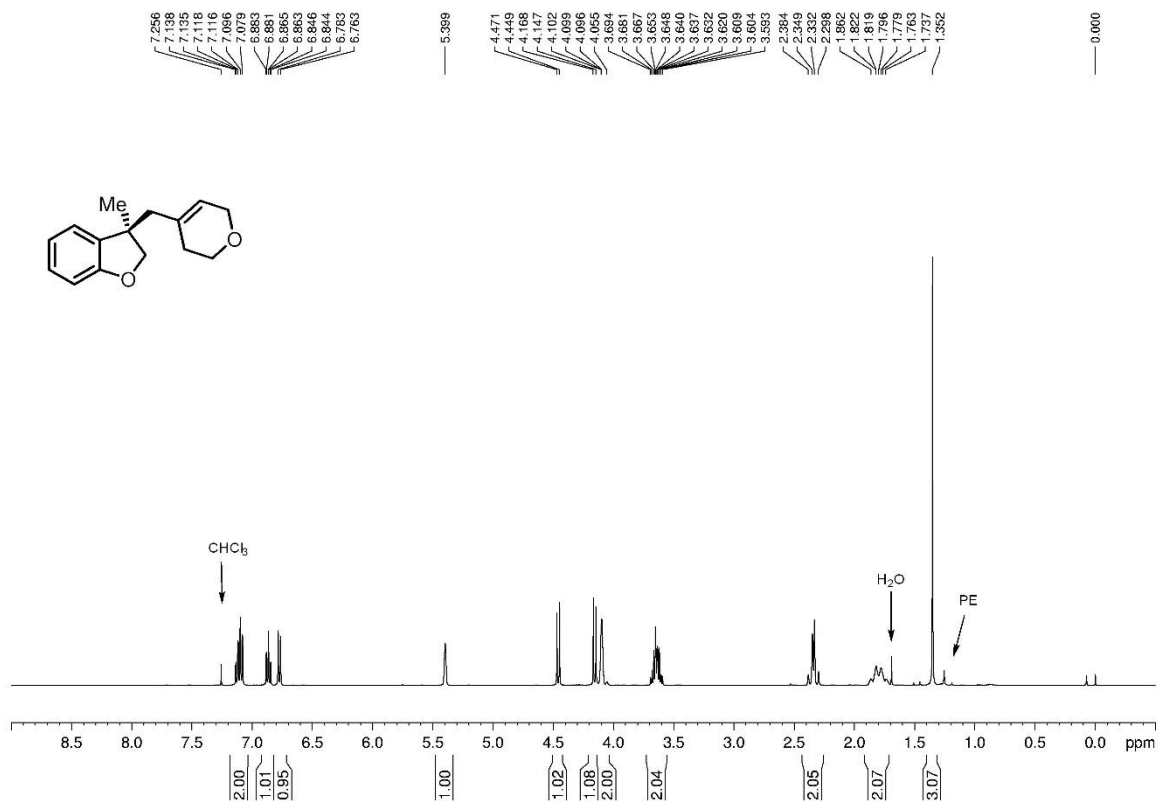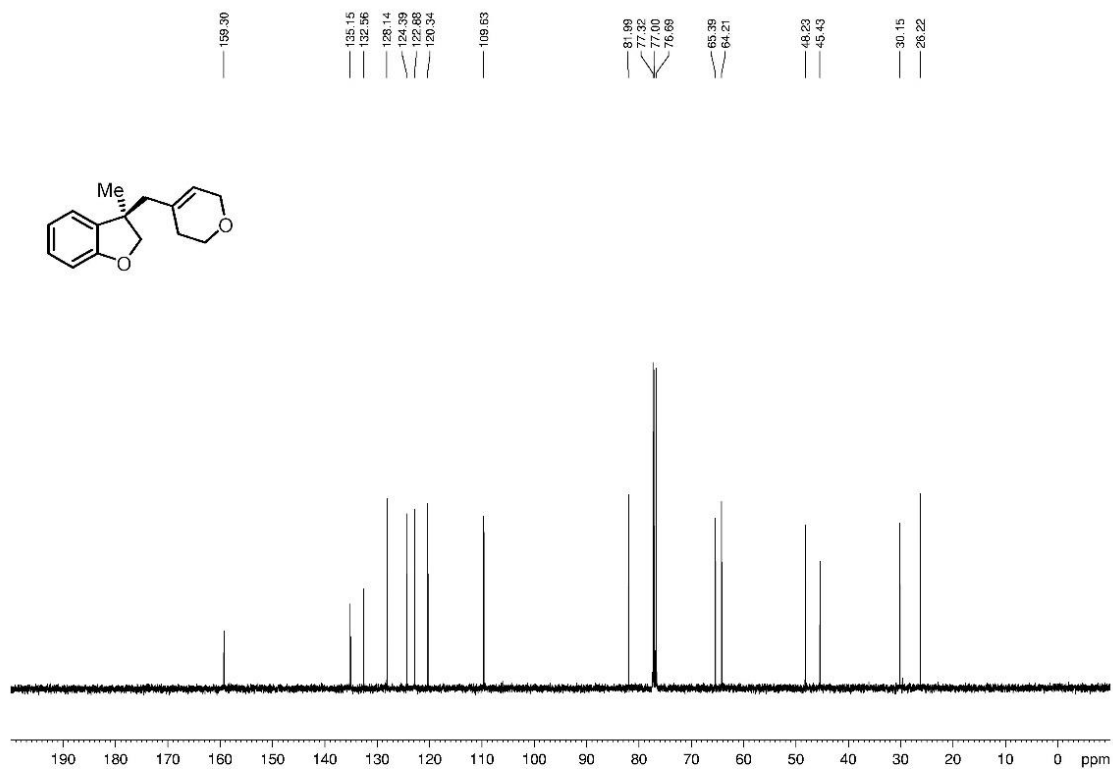

**3j;  $^1\text{H}$  NMR (400MHz,  $\text{CDCl}_3$ );  $^{13}\text{C}$  NMR (100MHz,  $\text{CDCl}_3$ )**

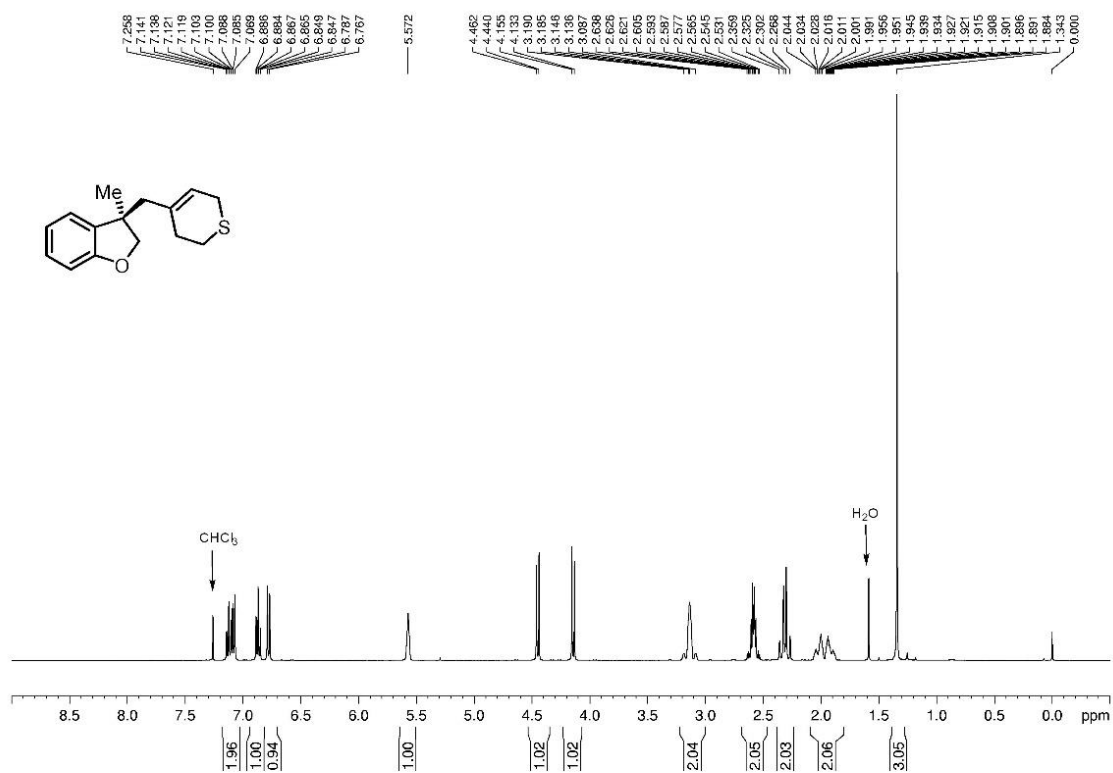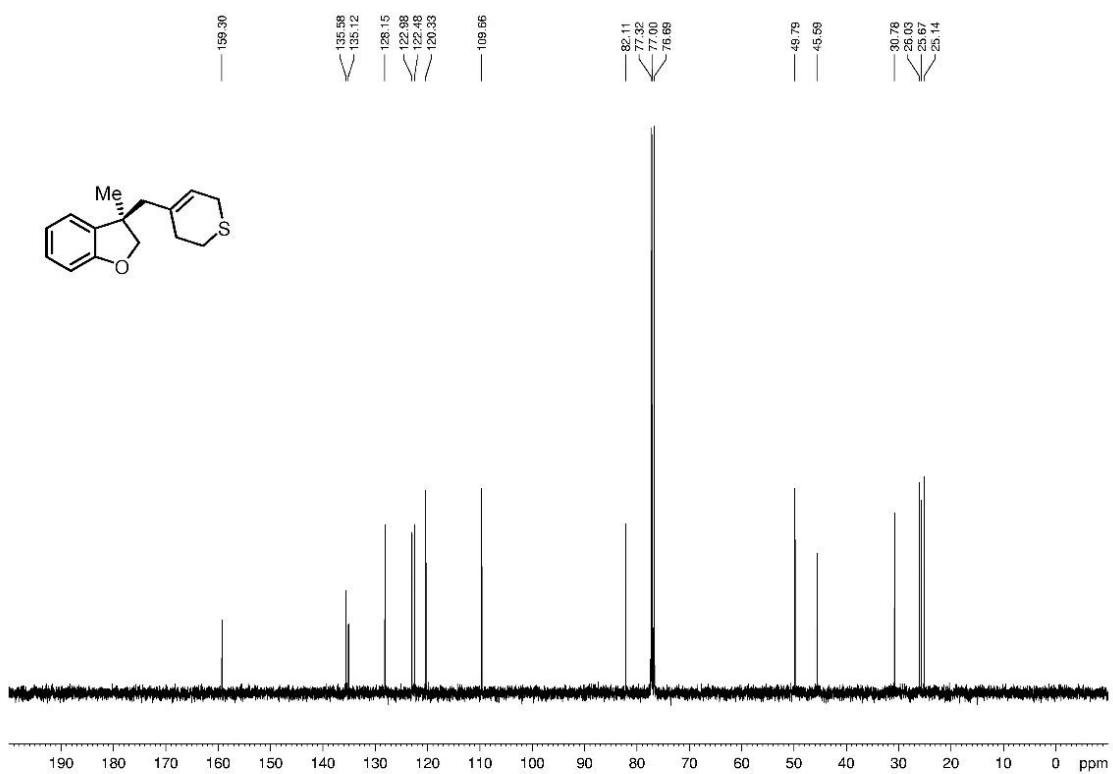



**3k;  $^1\text{H}$  NMR (400MHz,  $\text{CDCl}_3$ );  $^{13}\text{C}$  NMR (100MHz,  $\text{CDCl}_3$ )**

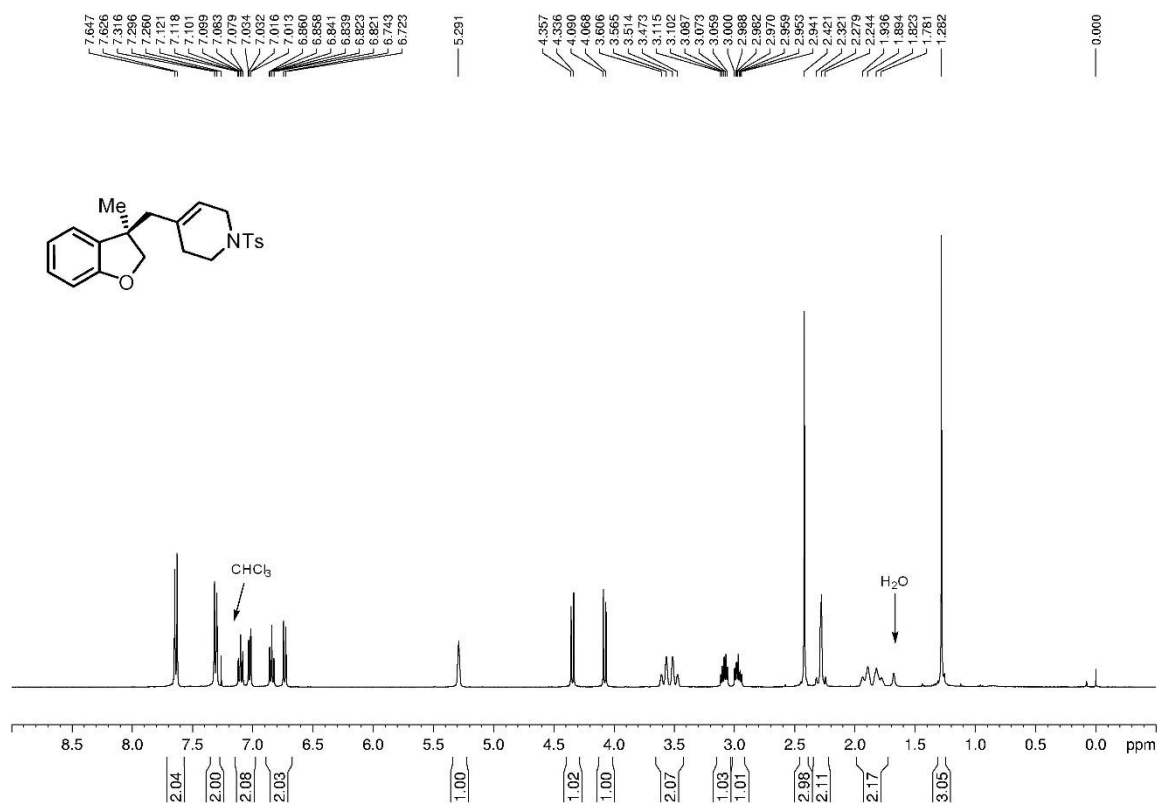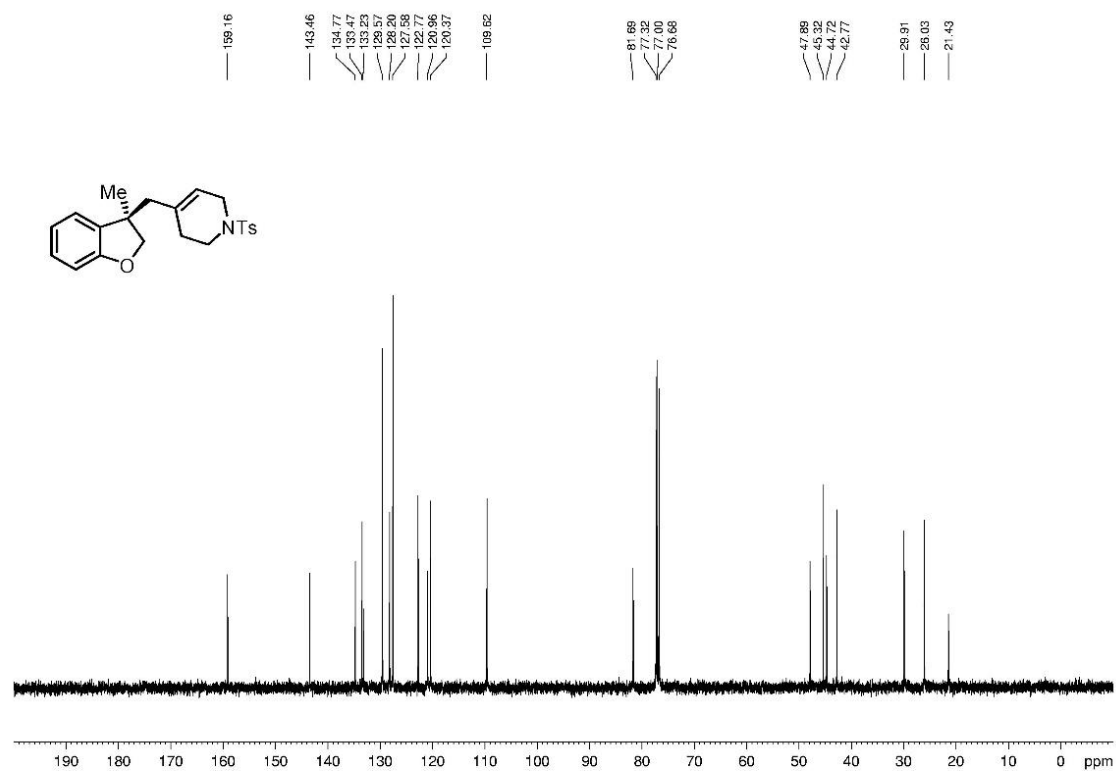

3l;  $^1\text{H}$  NMR (400MHz,  $\text{CDCl}_3$ );  $^{13}\text{C}$  NMR (100MHz,  $\text{CDCl}_3$ )

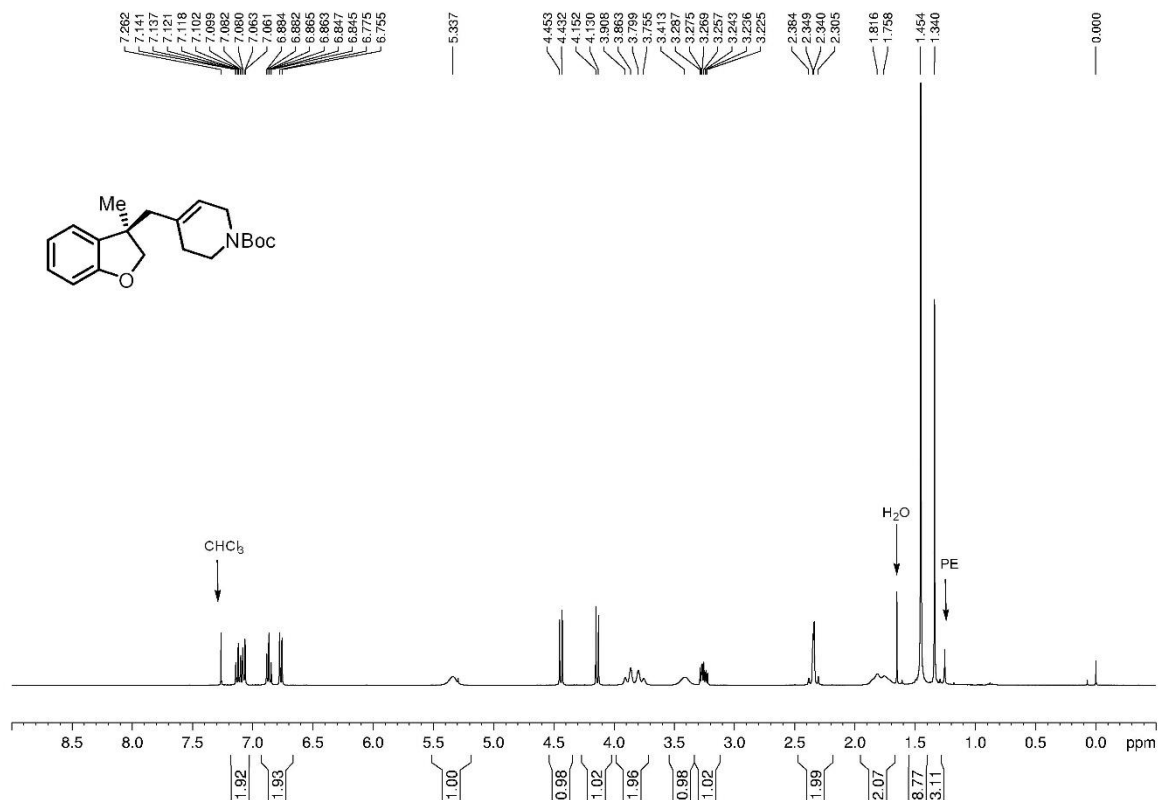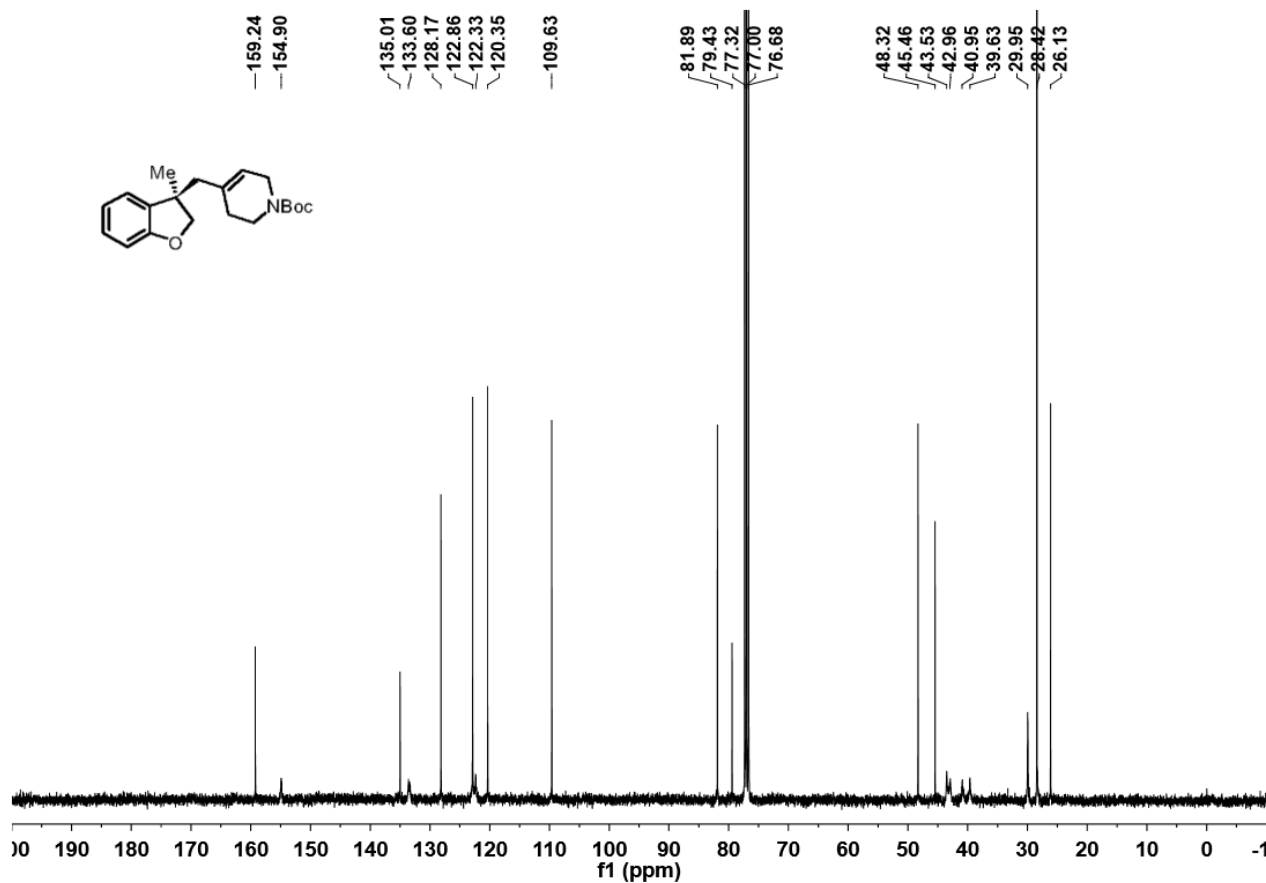

**3m;  $^1\text{H}$  NMR (400MHz,  $\text{CDCl}_3$ );  $^{13}\text{C}$  NMR (100MHz,  $\text{CDCl}_3$ )**

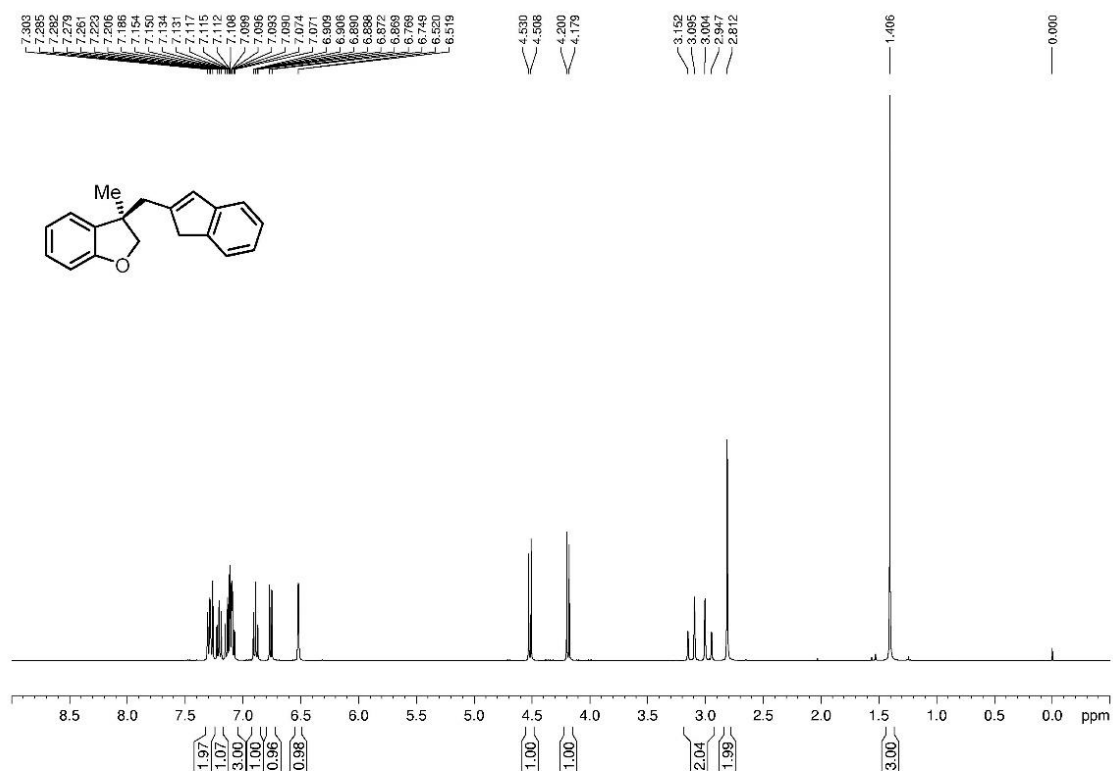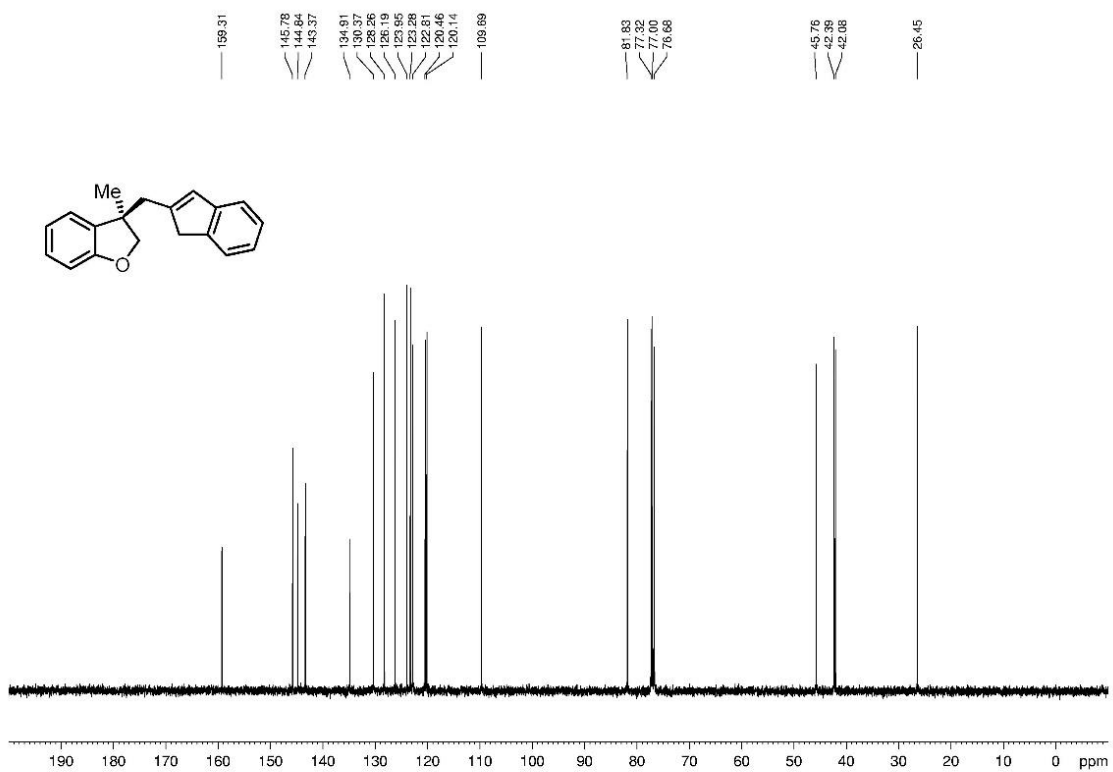

**3n;  $^1\text{H}$  NMR (400MHz,  $\text{CDCl}_3$ );  $^{13}\text{C}$  NMR (100MHz,  $\text{CDCl}_3$ )**

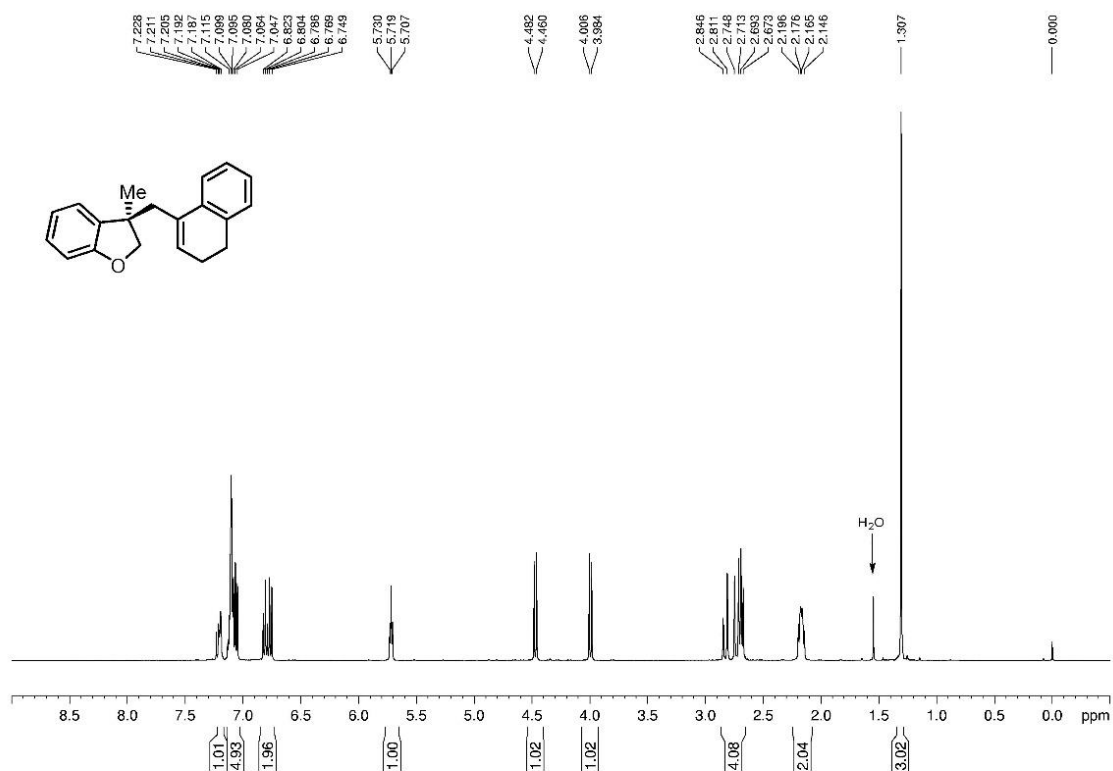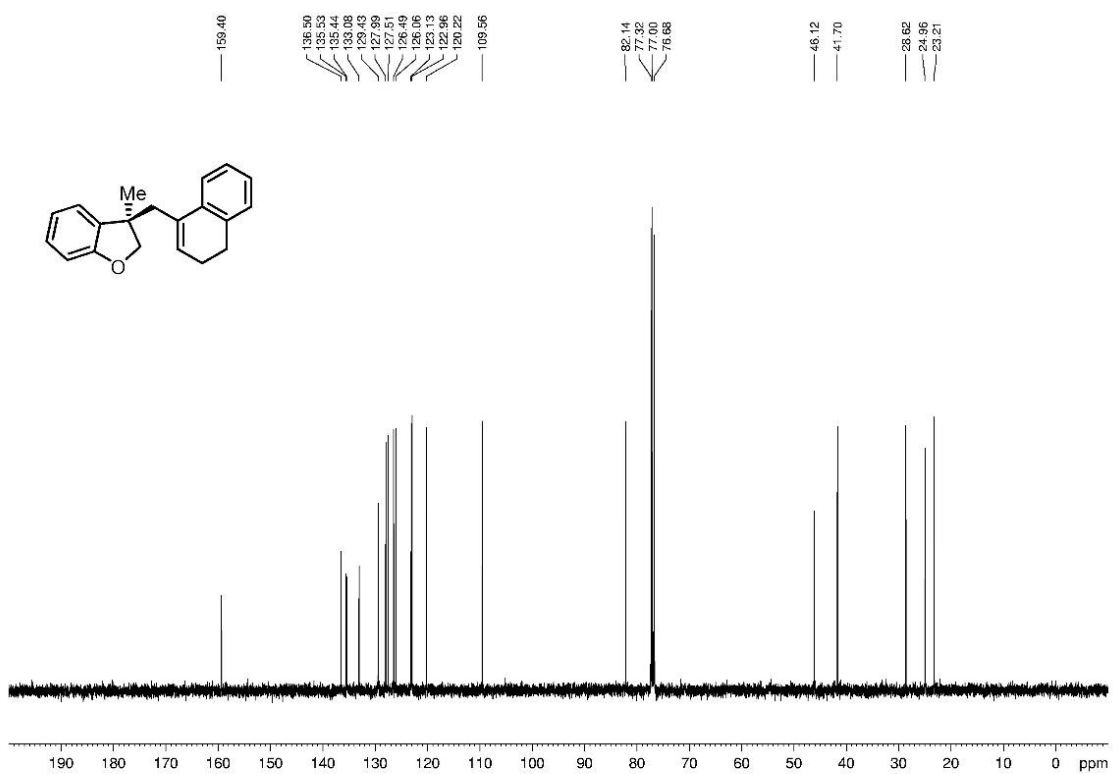

**3o;  $^1\text{H}$  NMR (400MHz,  $\text{CDCl}_3$ );  $^{13}\text{C}$  NMR (100MHz,  $\text{CDCl}_3$ )**

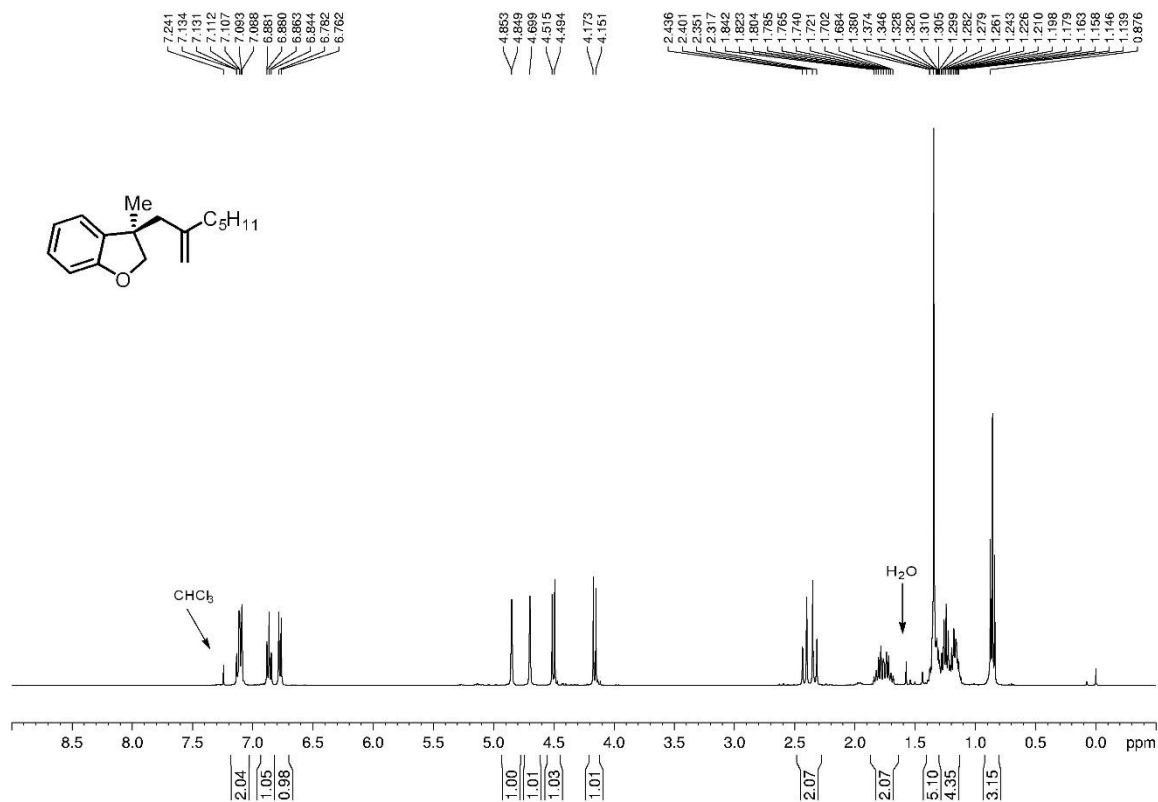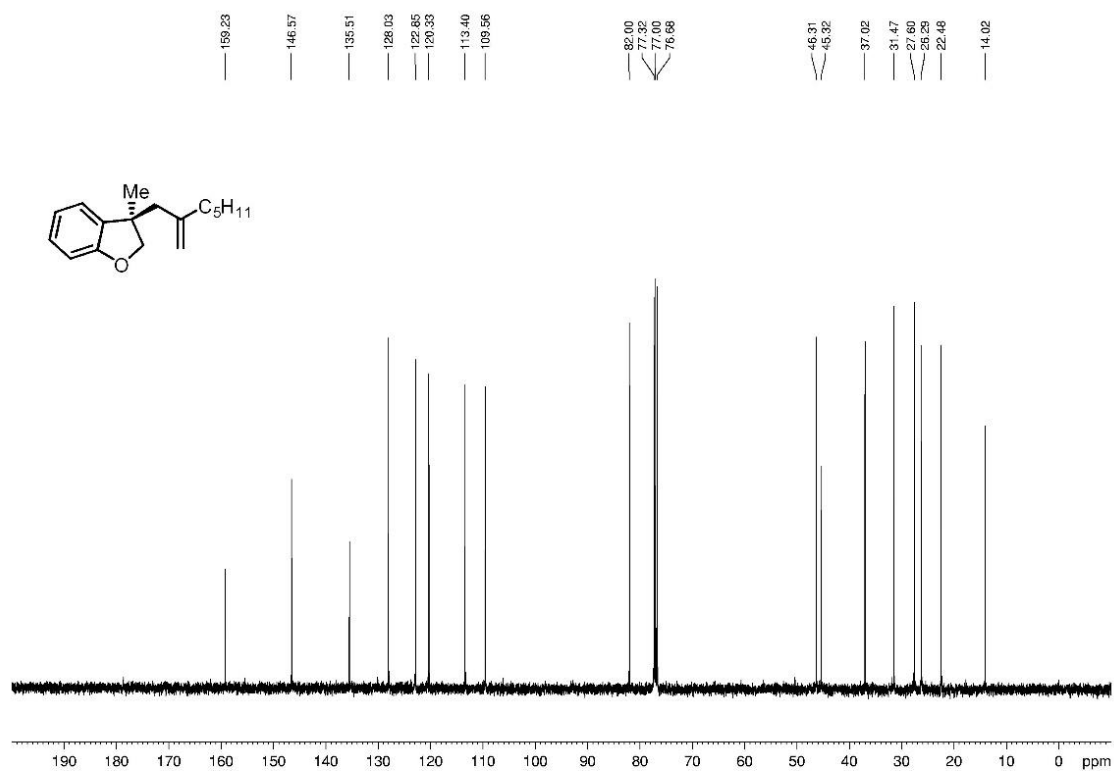

**3p;  $^1\text{H}$  NMR (400MHz,  $\text{CDCl}_3$ );  $^{13}\text{C}$  NMR (100MHz,  $\text{CDCl}_3$ )**

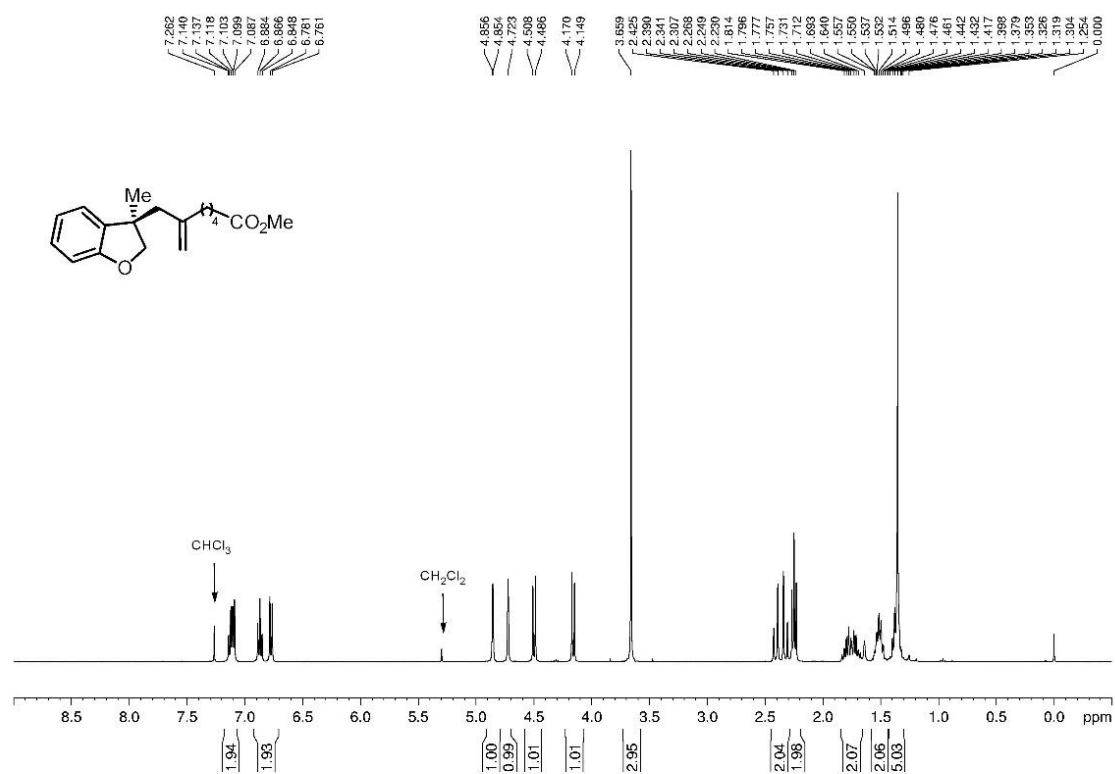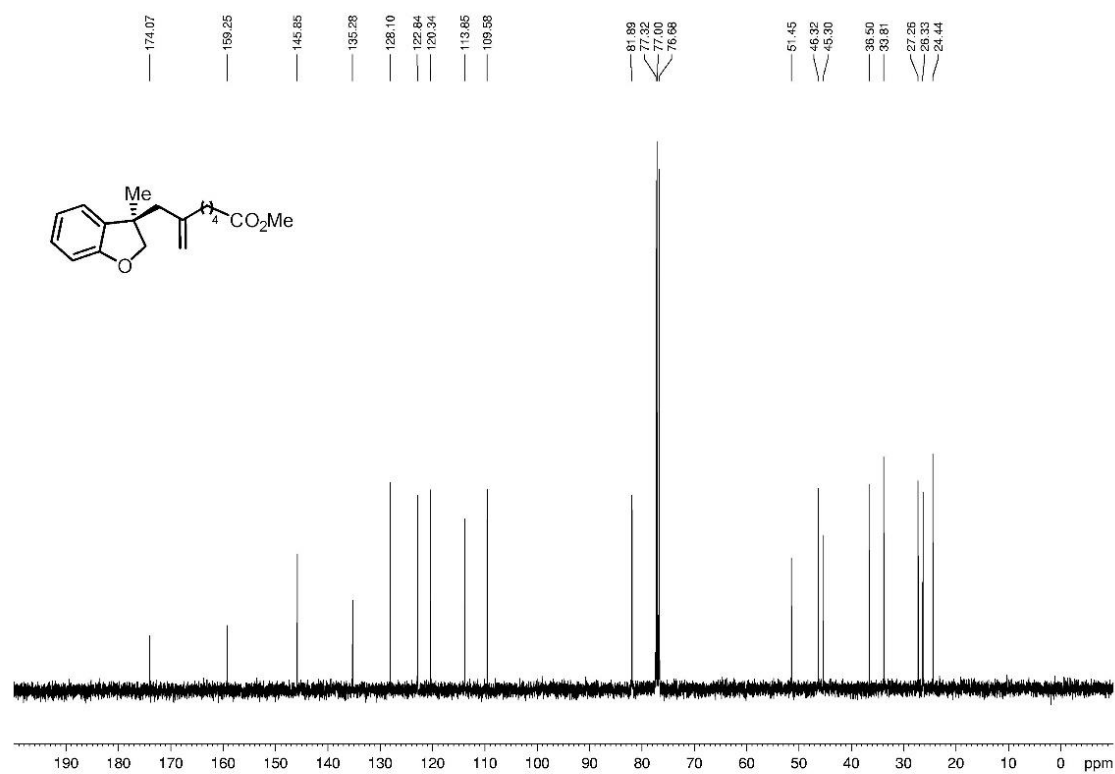

**3q;  $^1\text{H}$  NMR (400MHz,  $\text{CDCl}_3$ );  $^{13}\text{C}$  NMR (100MHz,  $\text{CDCl}_3$ )**

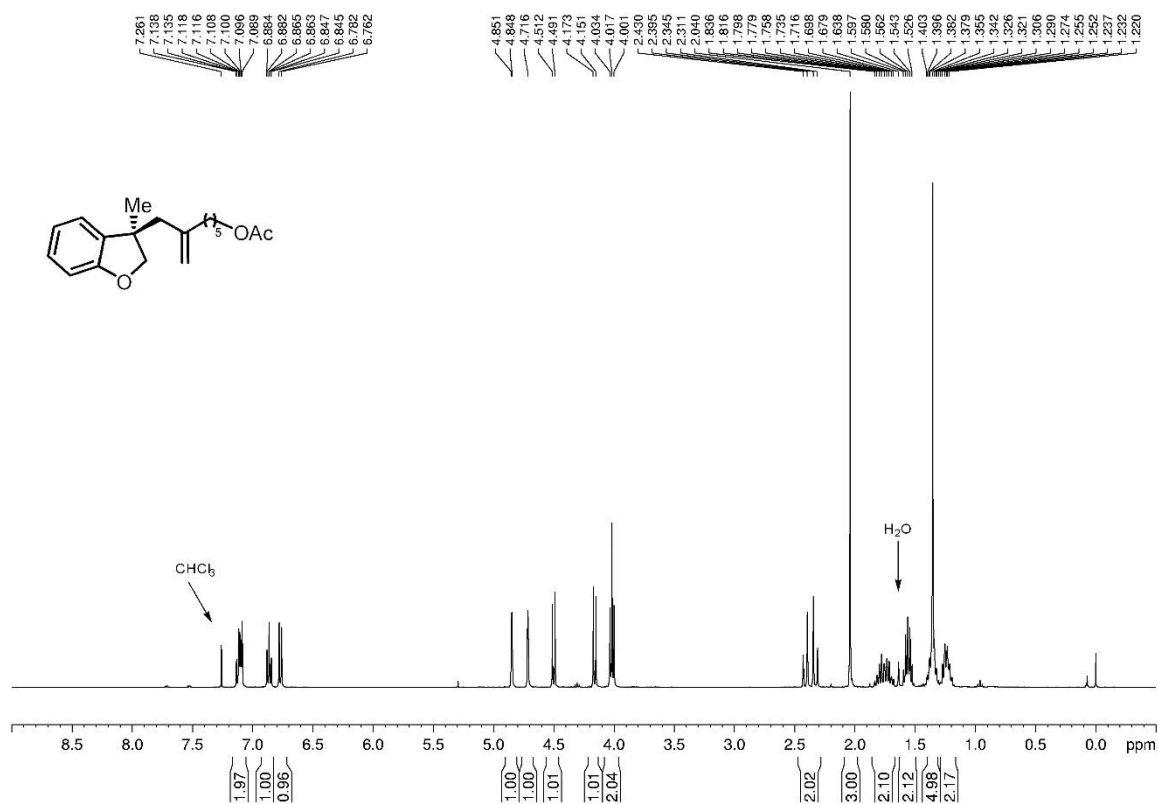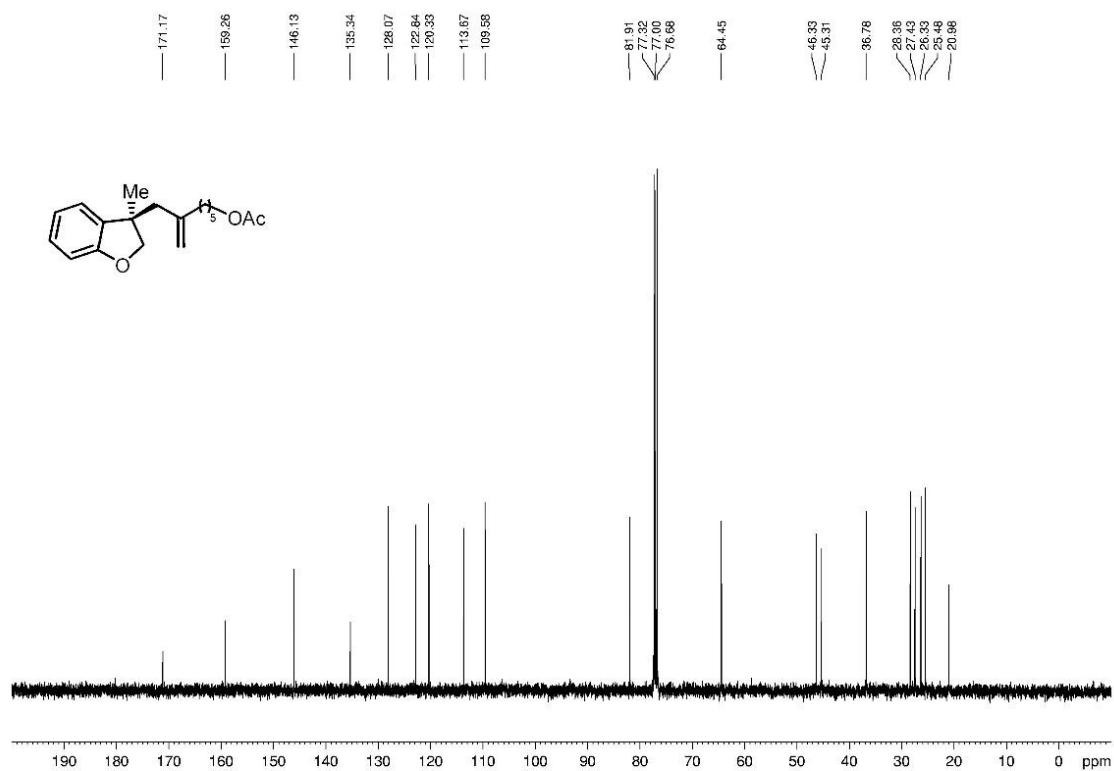

3s;  $^1\text{H}$  NMR (400MHz,  $\text{CDCl}_3$ );  $^{13}\text{C}$  NMR (100MHz,  $\text{CDCl}_3$ )

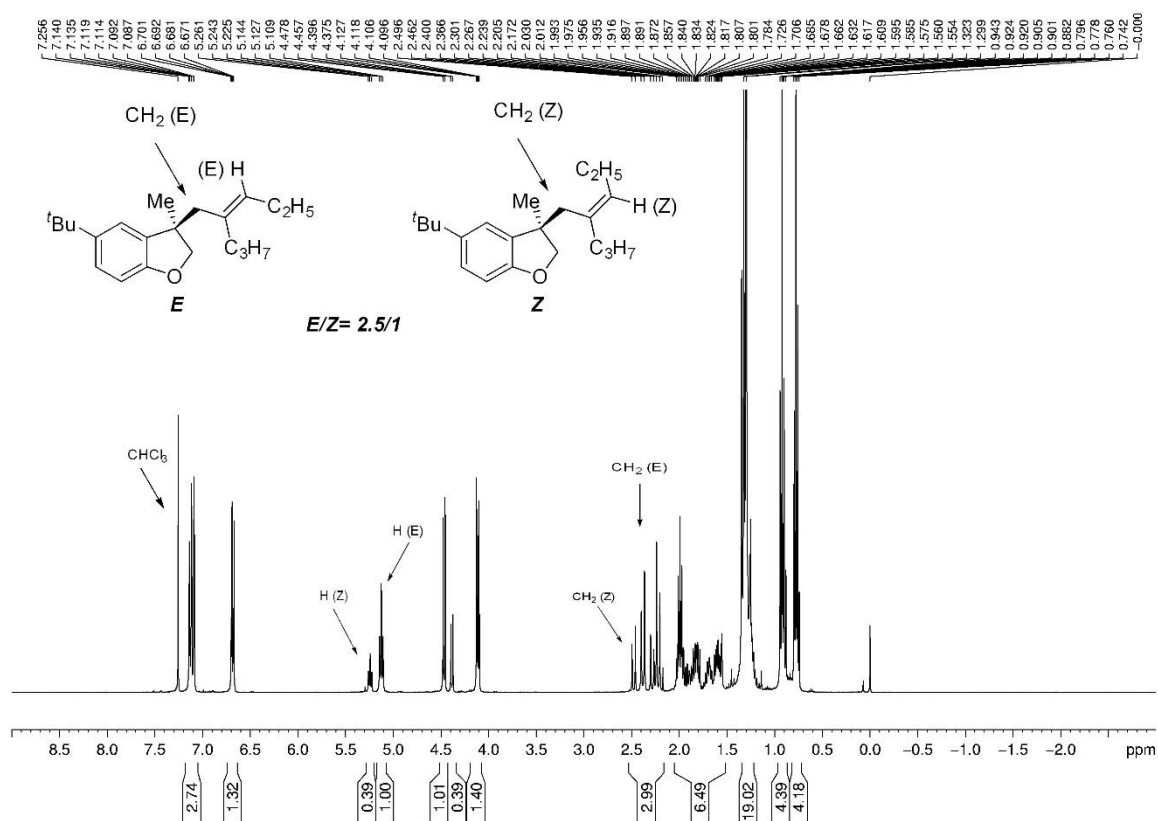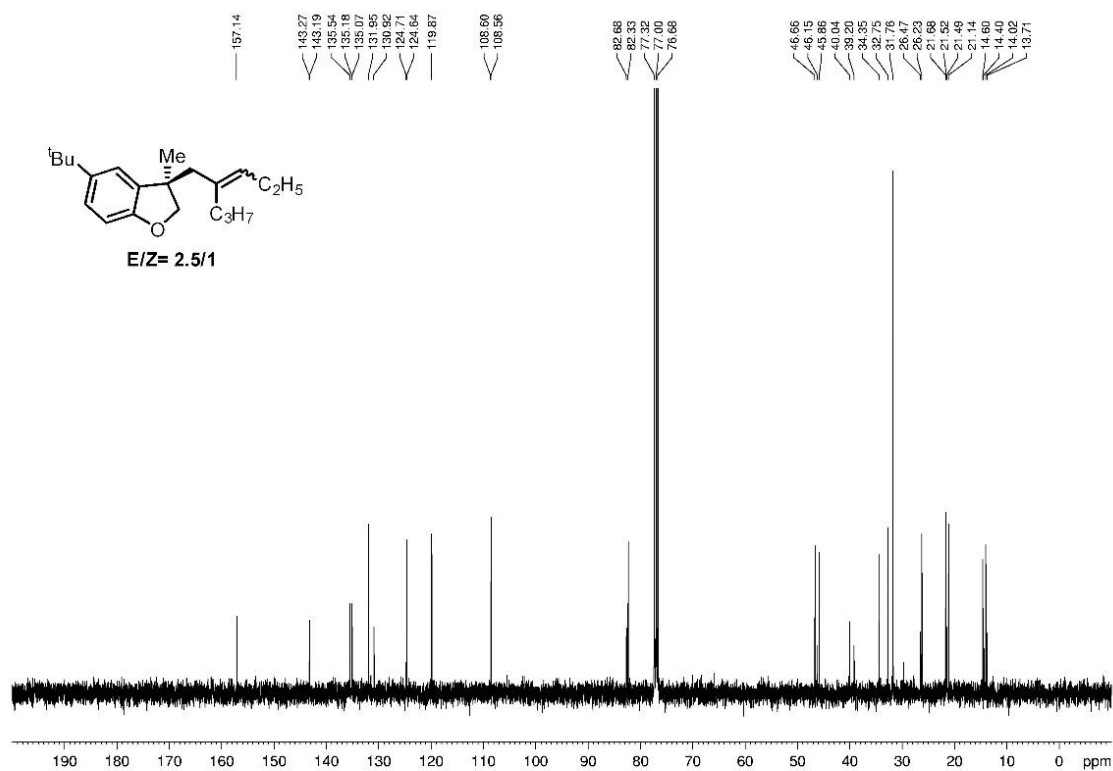



1D-NOE spectra of *E*-3s

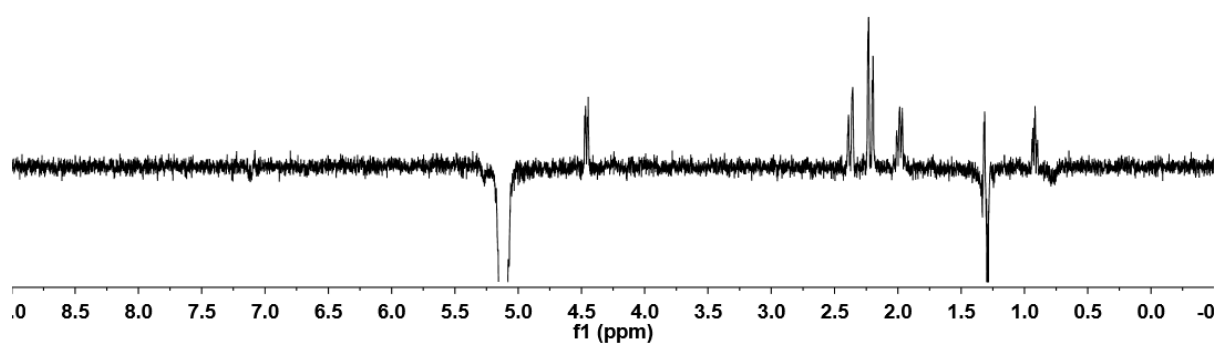

1D-NOE spectra of *Z*-3s

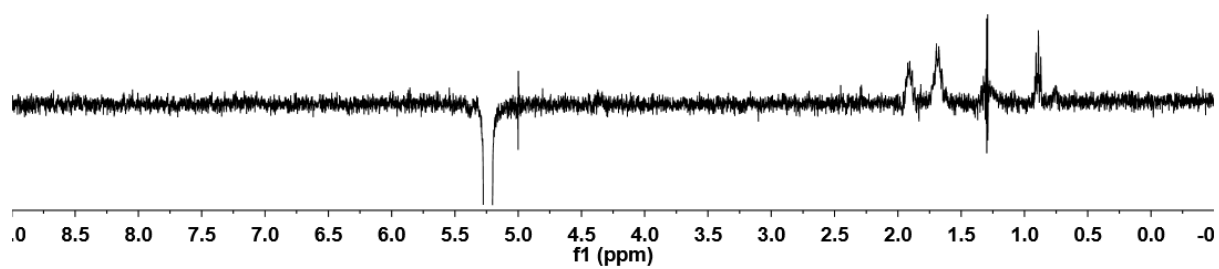

**3t;  $^1\text{H}$  NMR (400MHz,  $\text{CDCl}_3$ );  $^{13}\text{C}$  NMR (100MHz,  $\text{CDCl}_3$ )**

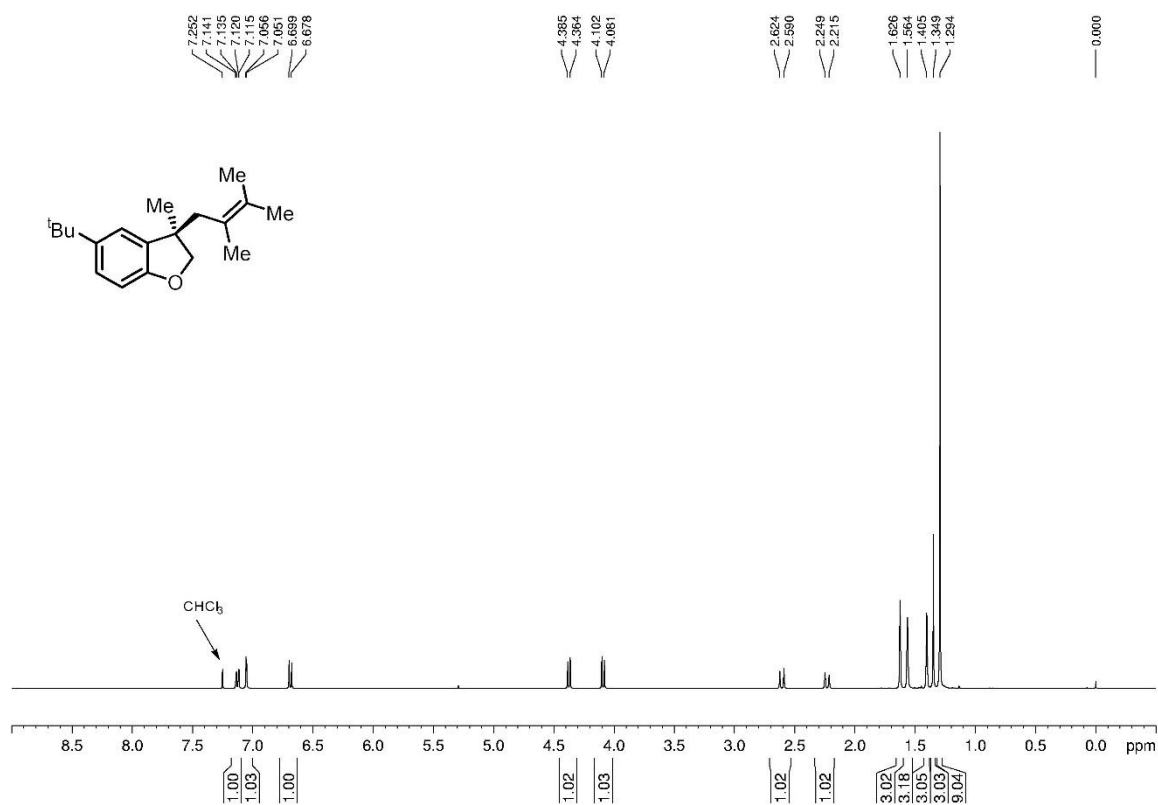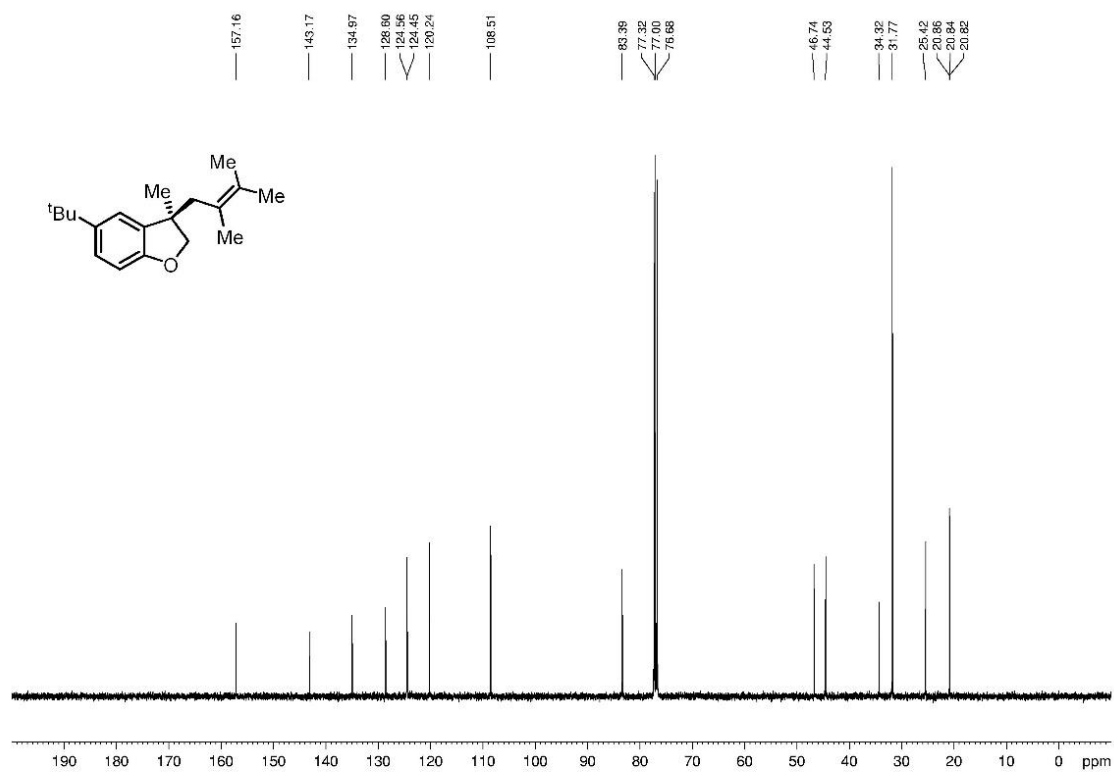

**3u;  $^1\text{H}$  NMR (400MHz,  $\text{CDCl}_3$ );  $^{13}\text{C}$  NMR (100MHz,  $\text{CDCl}_3$ )**

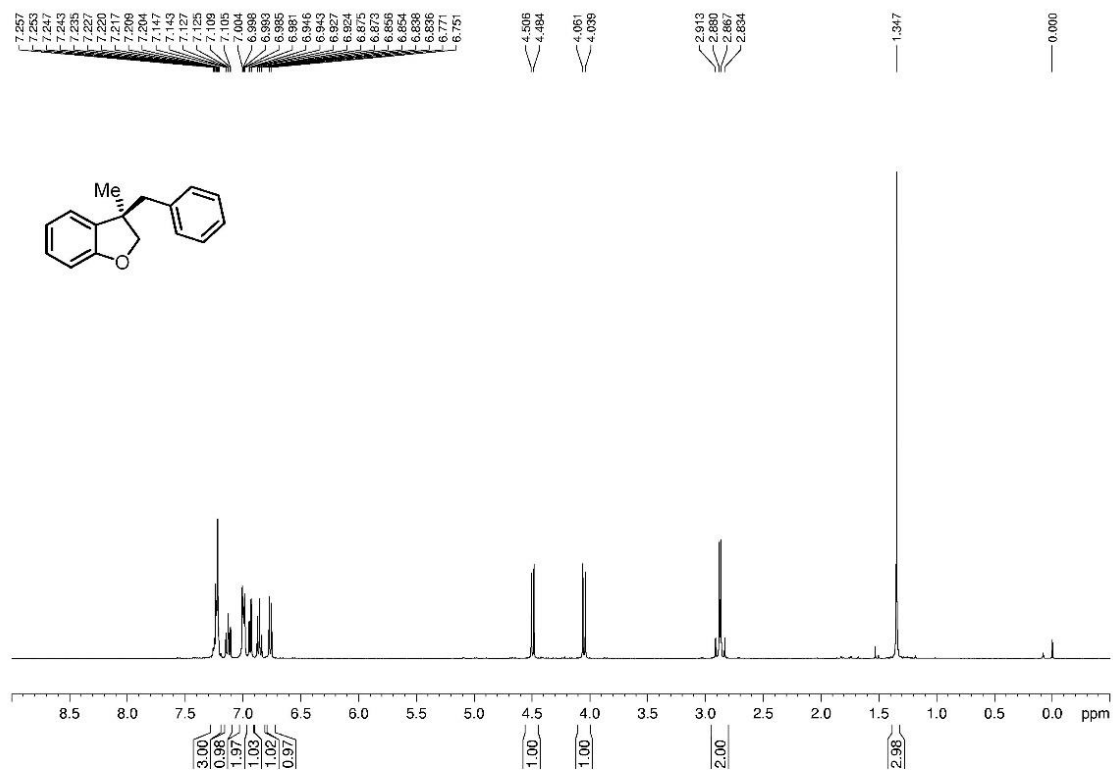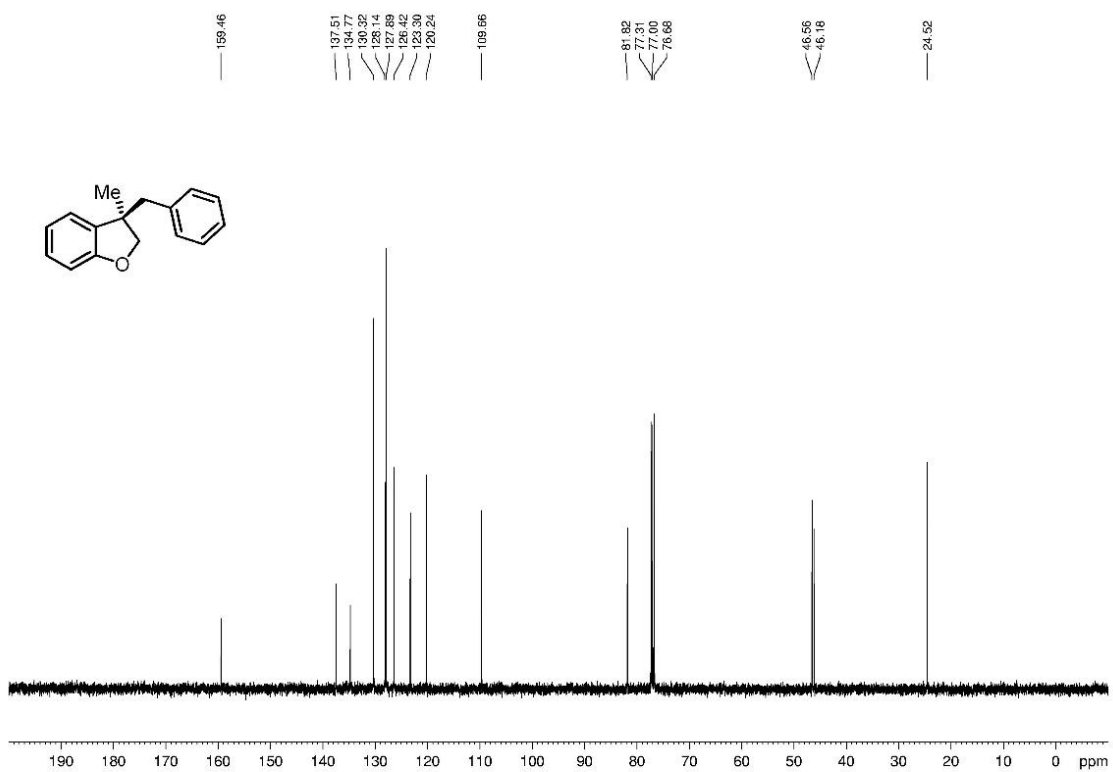

**3v;  $^1\text{H}$  NMR (400MHz,  $\text{CDCl}_3$ );  $^{13}\text{C}$  NMR (100MHz,  $\text{CDCl}_3$ )**

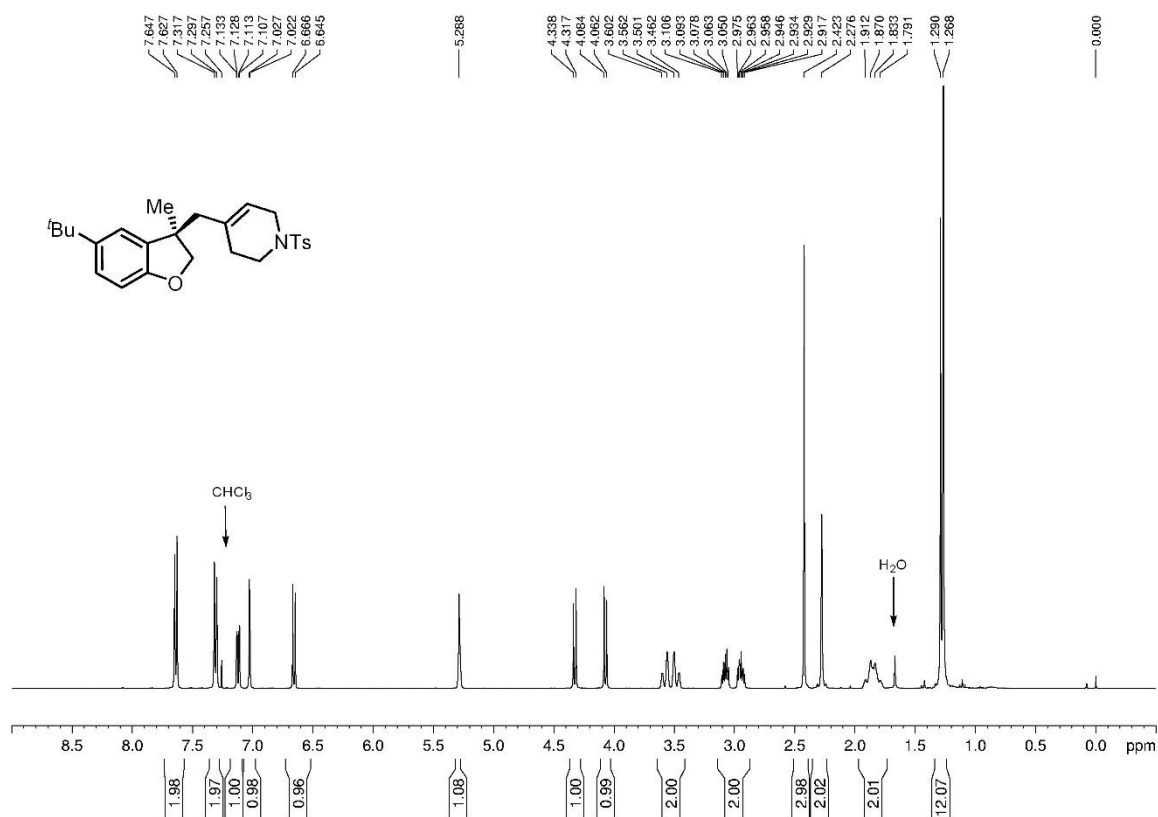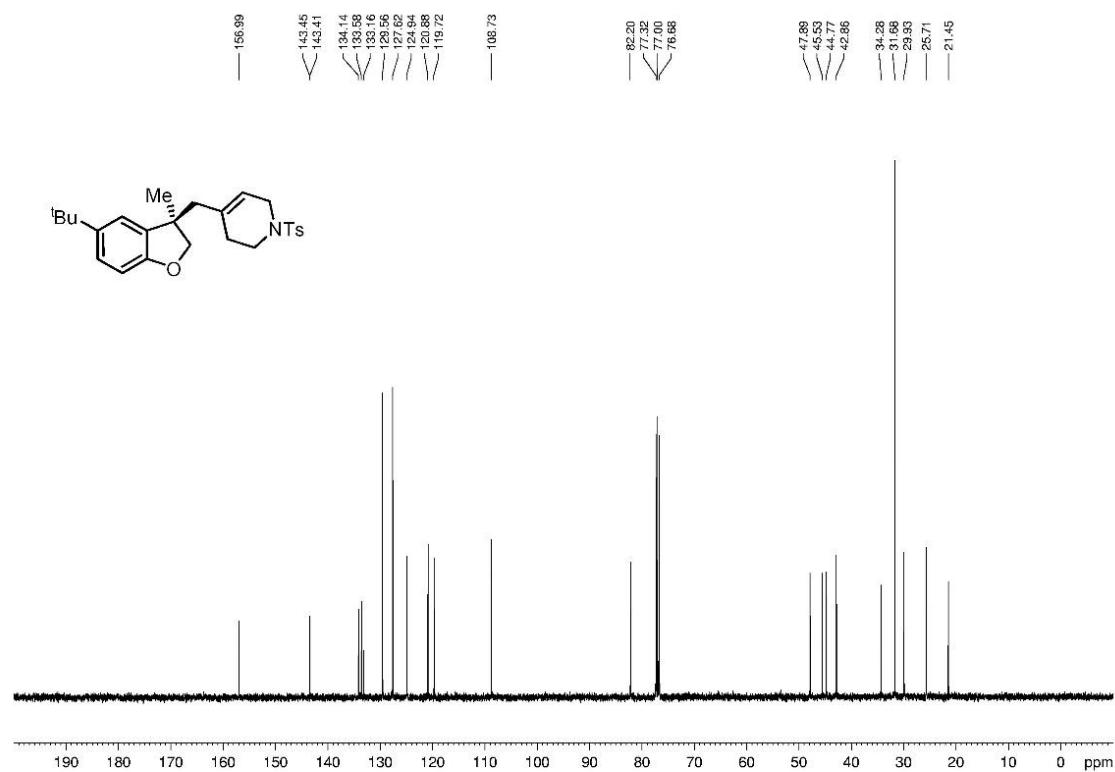

**3w;  $^1\text{H}$  NMR (400MHz,  $\text{CDCl}_3$ );  $^{13}\text{C}$  NMR (100MHz,  $\text{CDCl}_3$ )**

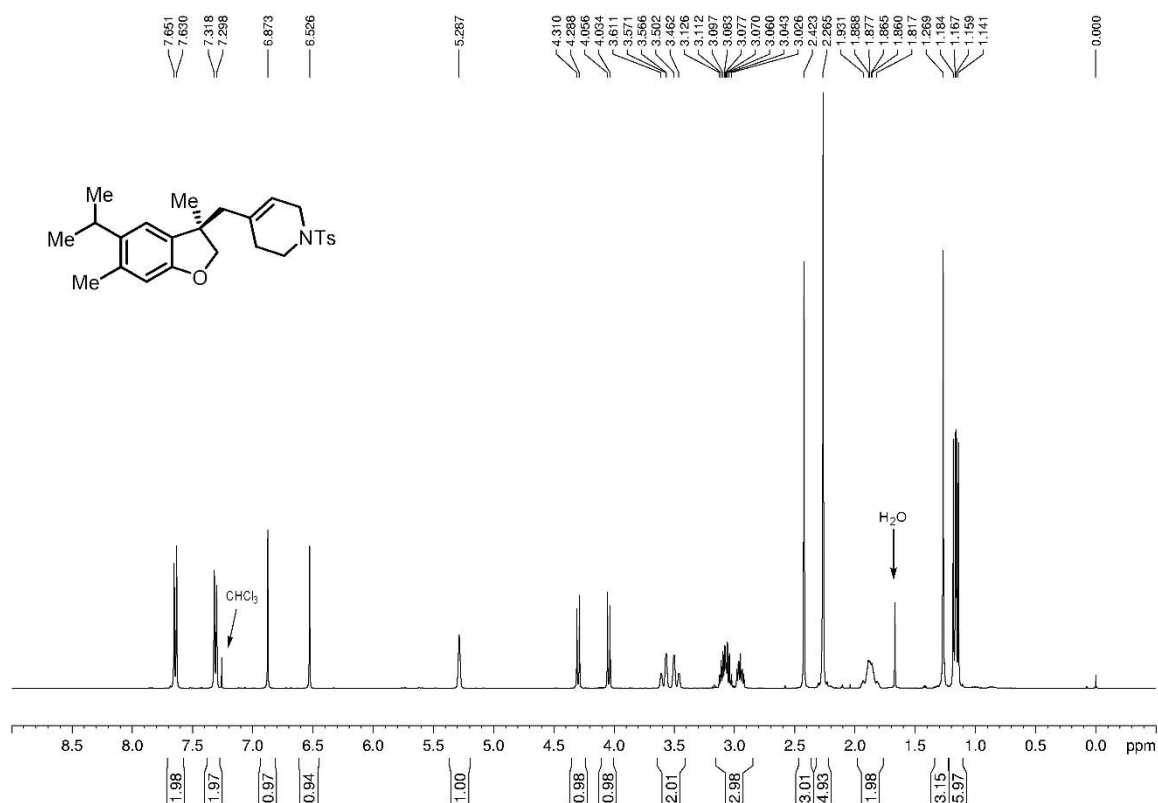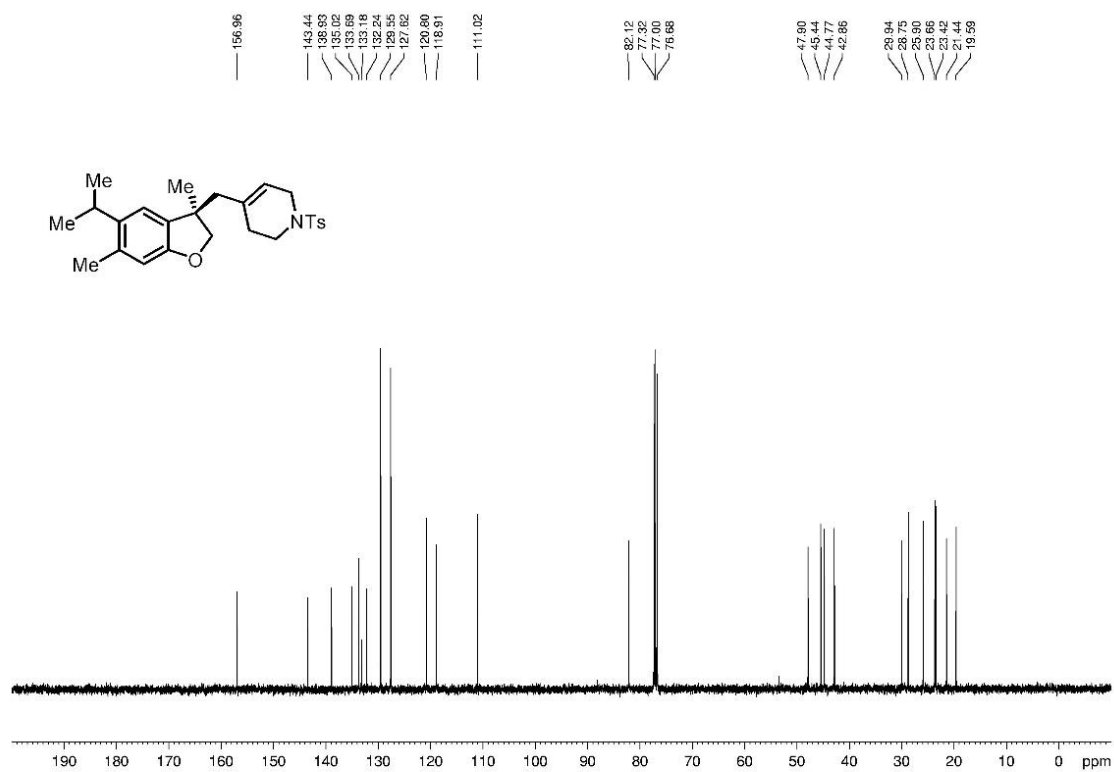

**3x;  $^1\text{H}$  NMR (400MHz,  $\text{CDCl}_3$ );  $^{13}\text{C}$  NMR (100MHz,  $\text{CDCl}_3$ )**

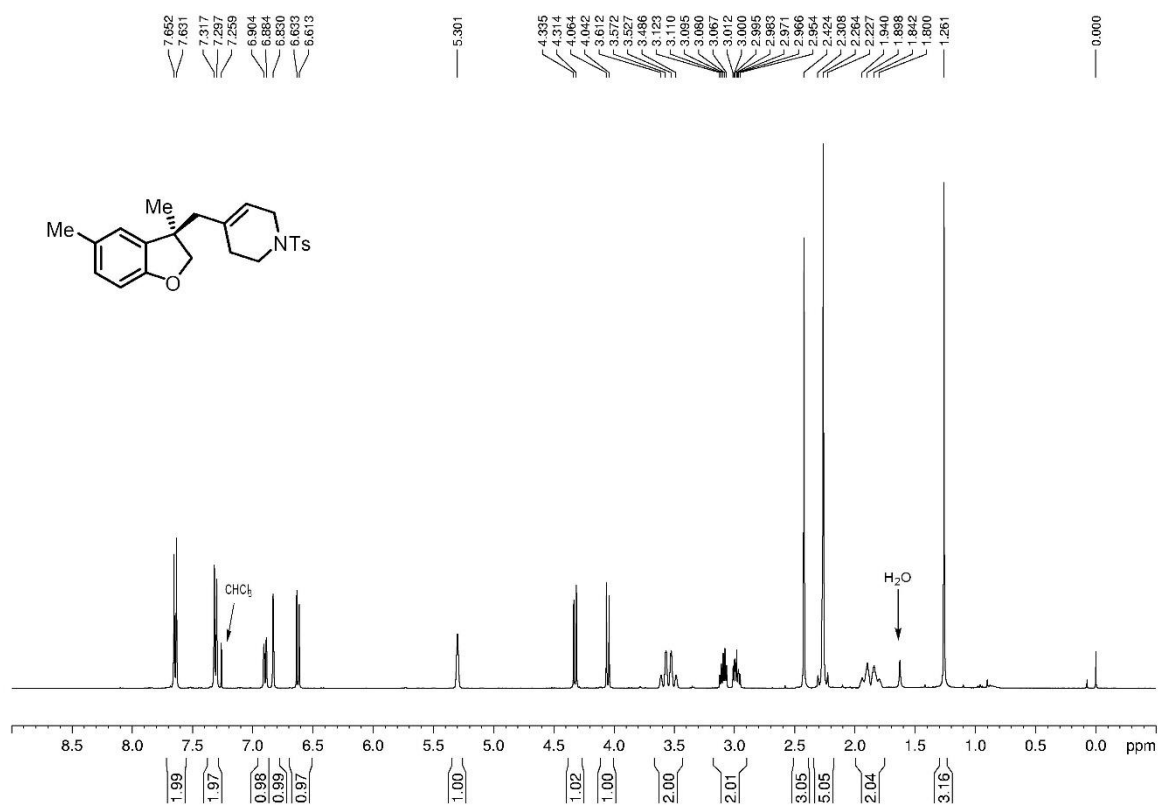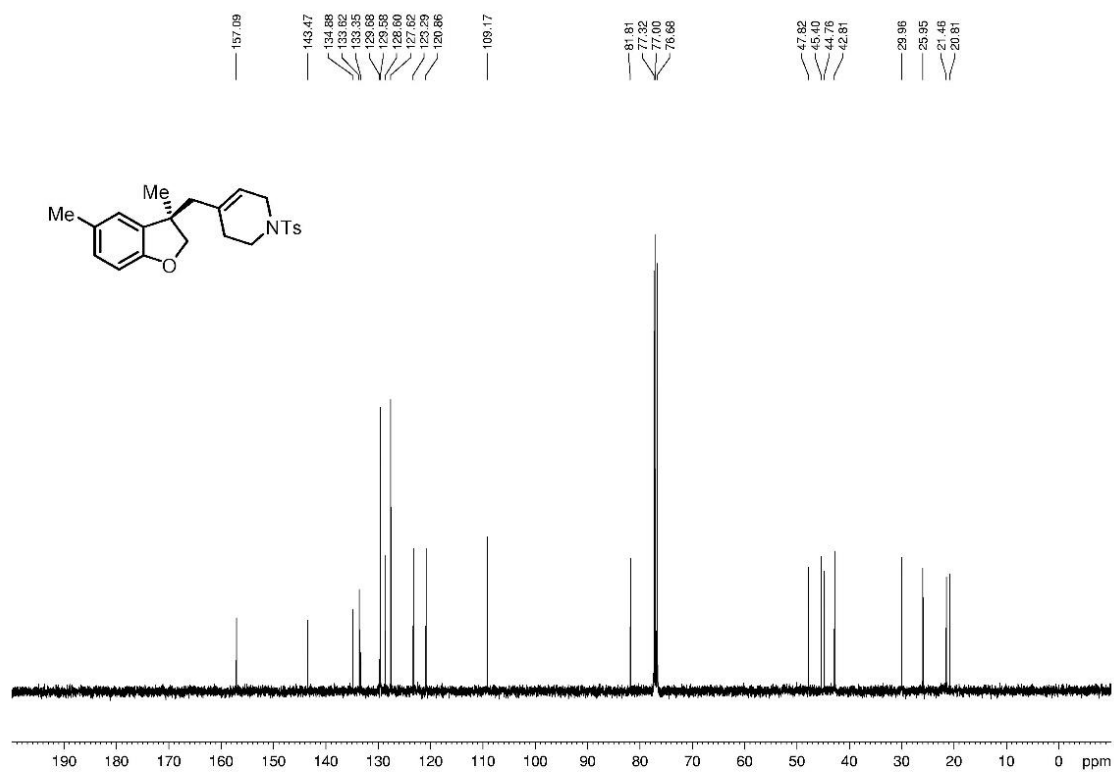

**3y;  $^1\text{H}$  NMR (400MHz,  $\text{CDCl}_3$ );  $^{13}\text{C}$  NMR (100MHz,  $\text{CDCl}_3$ )**

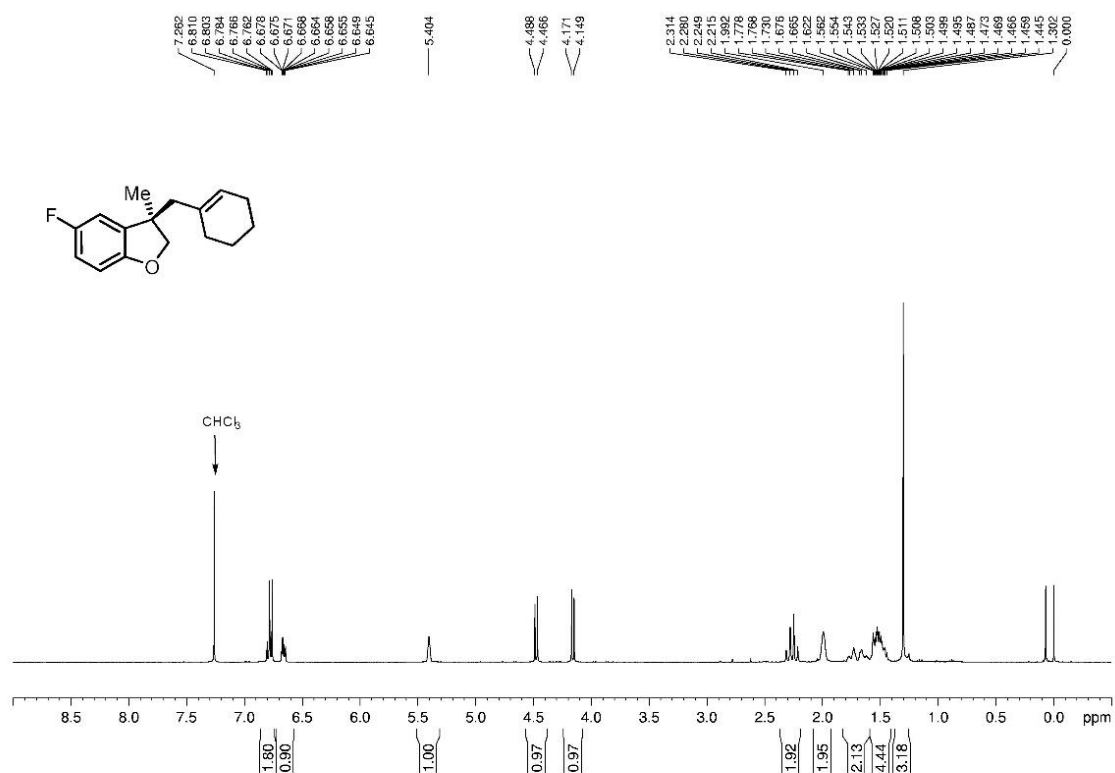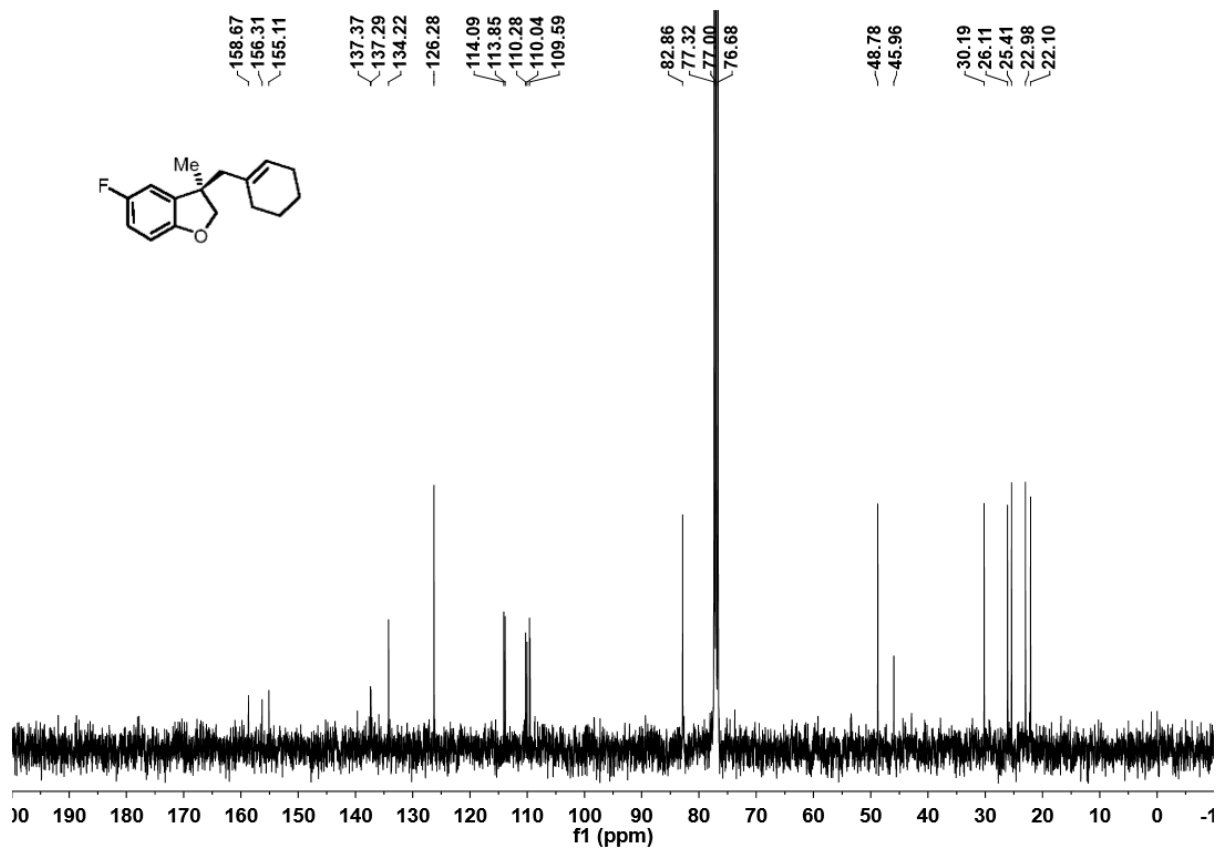

**3y;  $^{19}\text{F}$  NMR (376MHz,  $\text{CDCl}_3$ )**

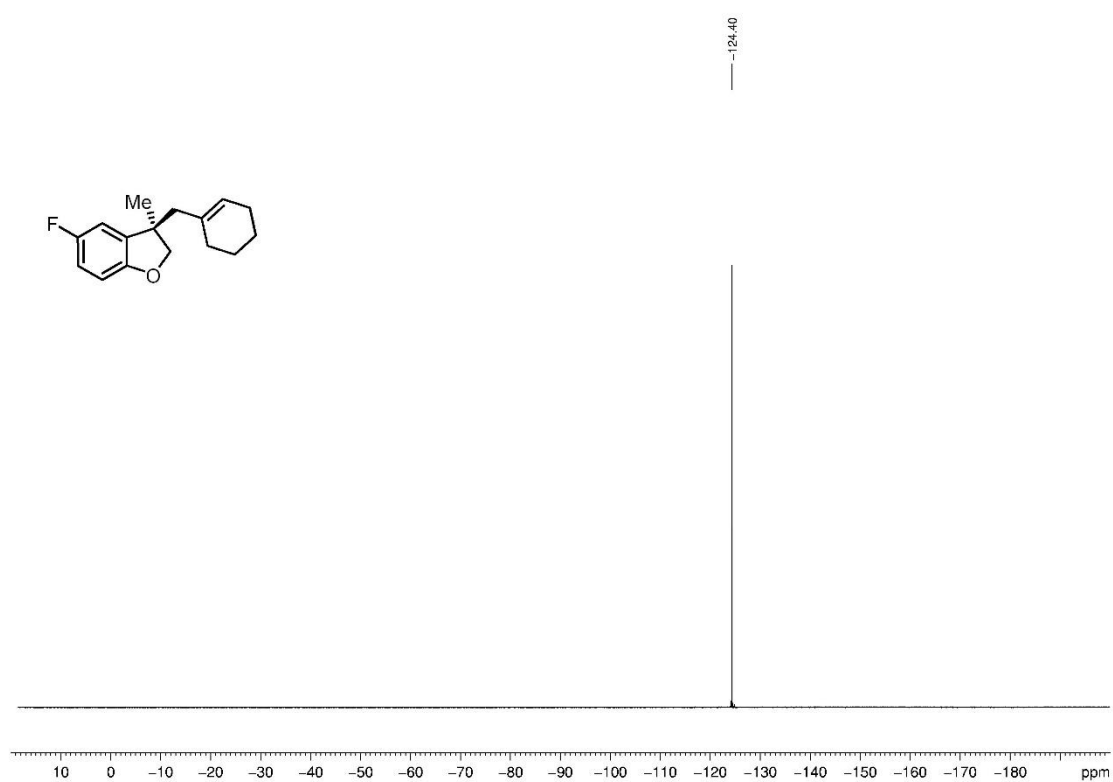



**3z;  $^1\text{H}$  NMR (400MHz,  $\text{CDCl}_3$ );  $^{13}\text{C}$  NMR (100MHz,  $\text{CDCl}_3$ )**

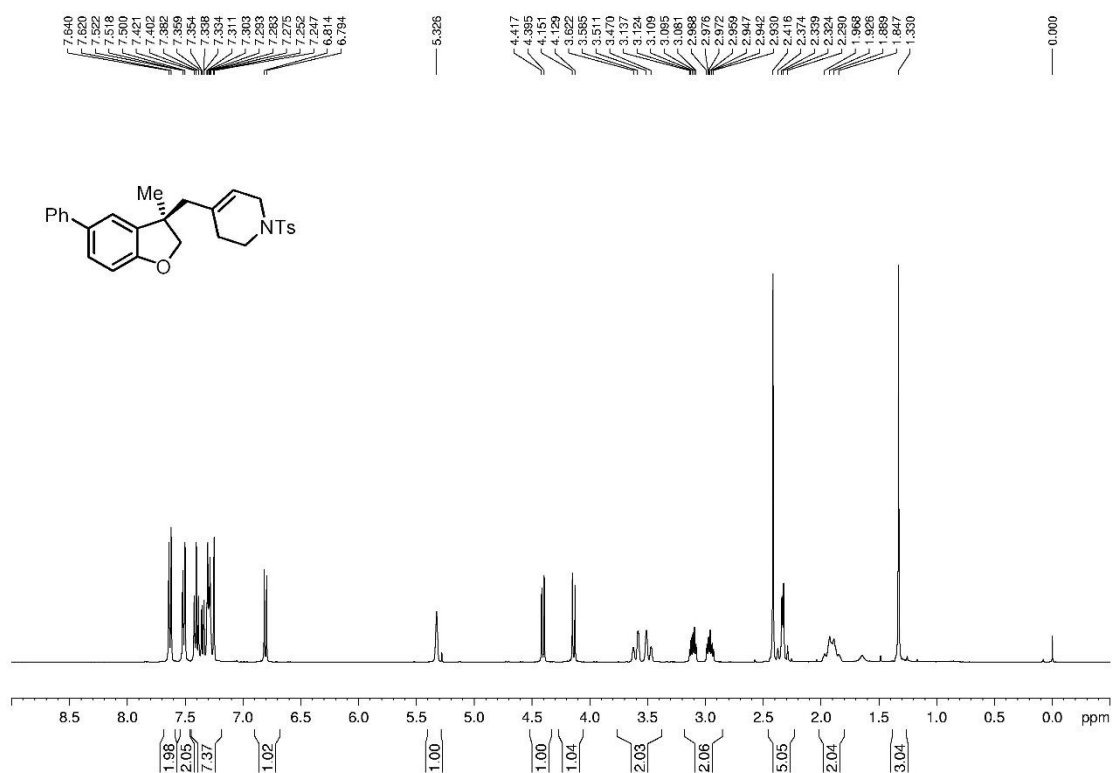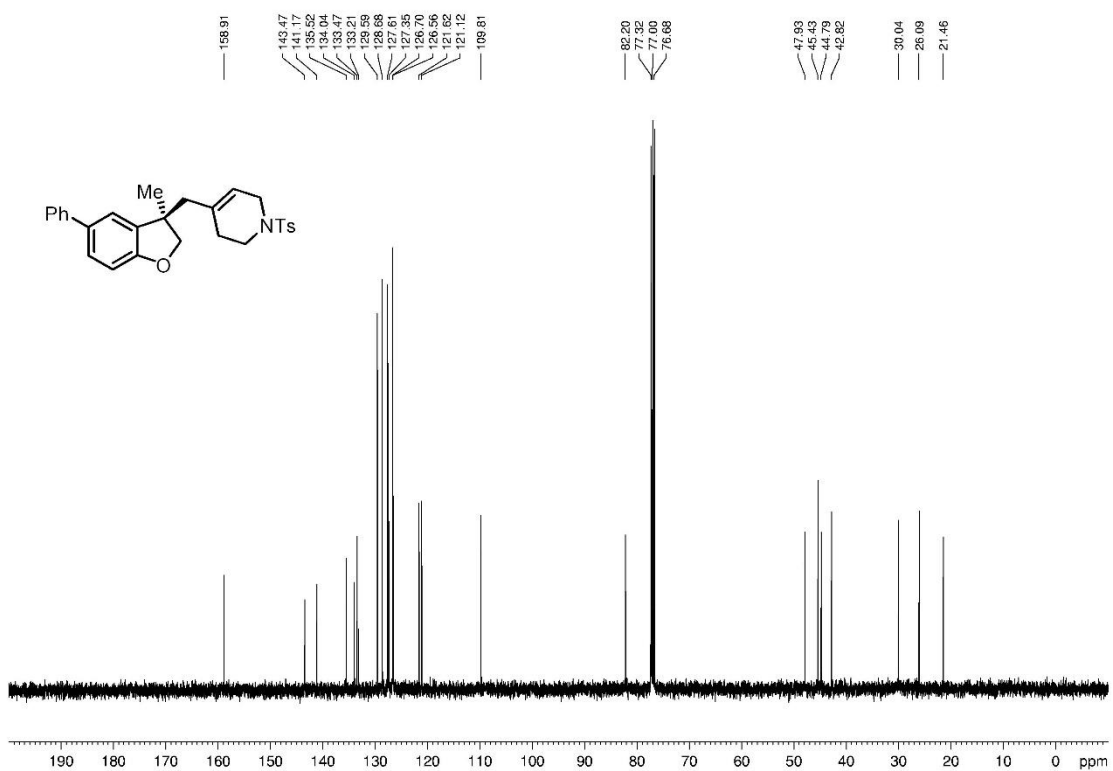

**3ab;  $^1\text{H}$  NMR (400MHz,  $\text{CDCl}_3$ );  $^{13}\text{C}$  NMR (100MHz,  $\text{CDCl}_3$ )**

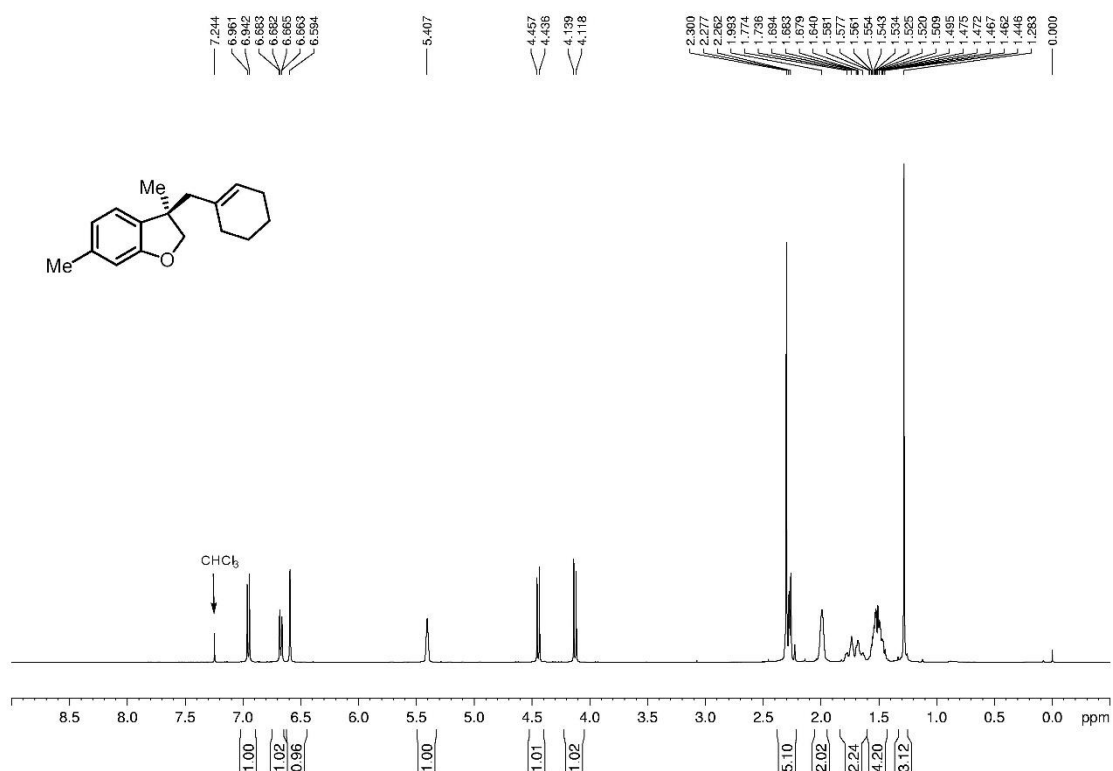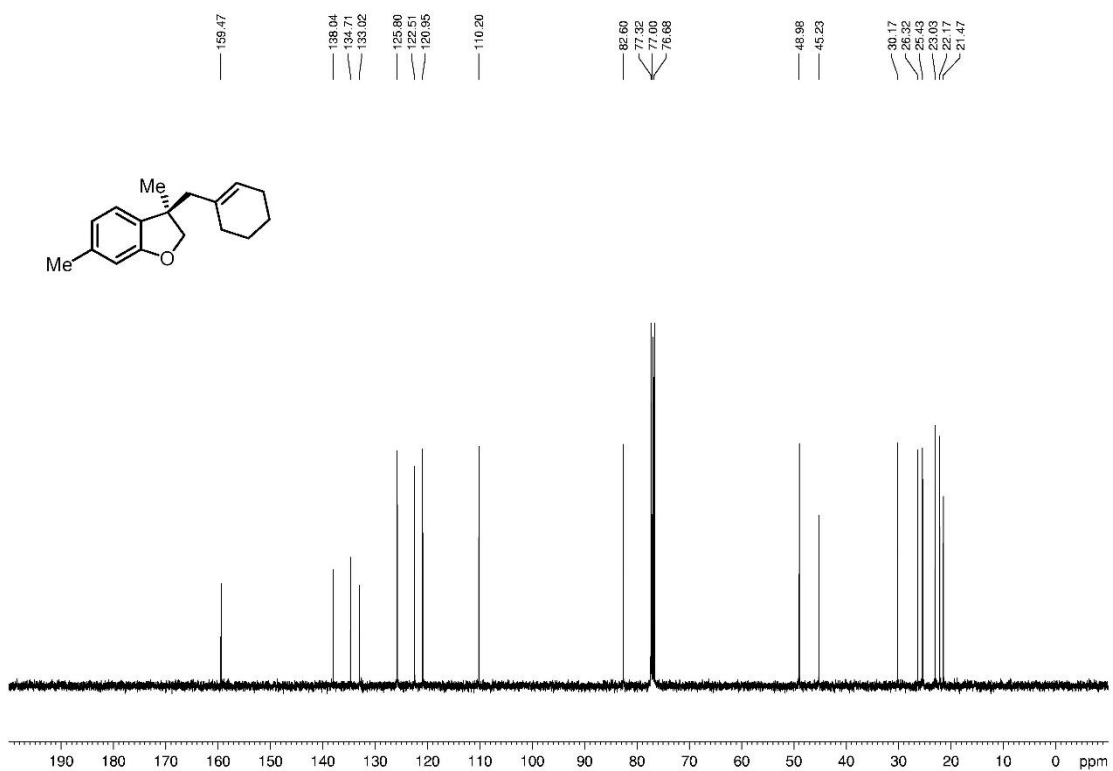

**3ac; <sup>1</sup>H NMR (400MHz, CDCl<sub>3</sub>); <sup>13</sup>C NMR (100MHz, CDCl<sub>3</sub>)**

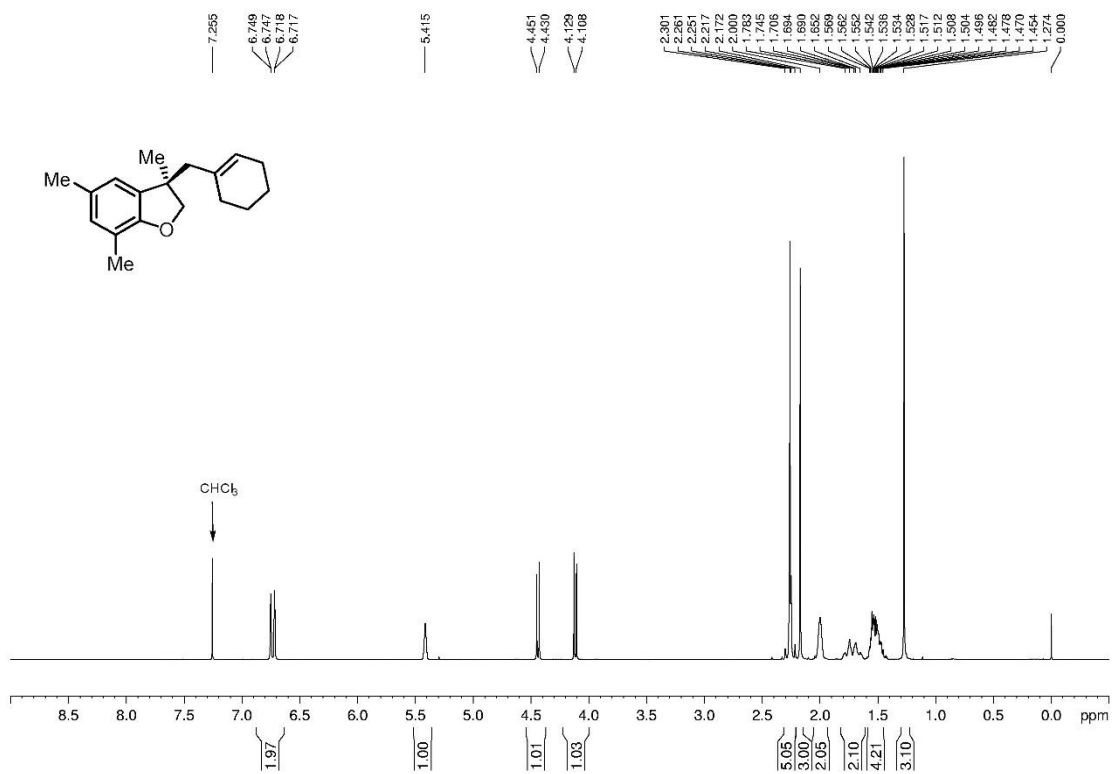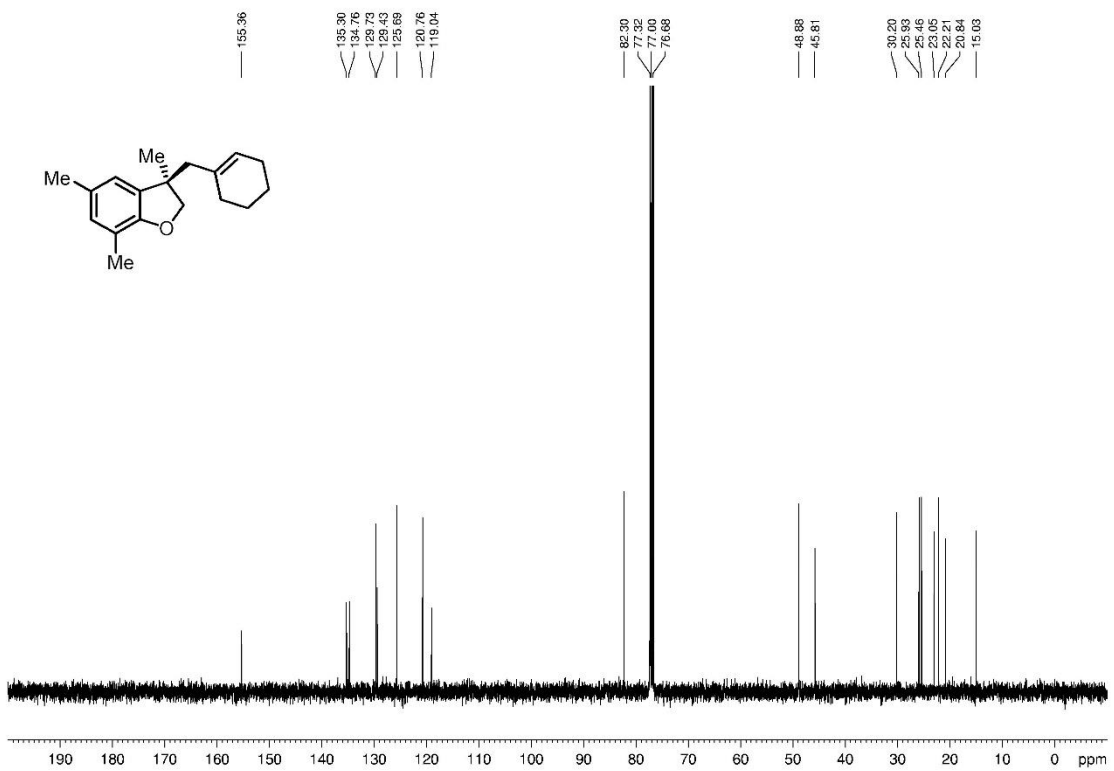

**3ae;  $^1\text{H}$  NMR (400MHz,  $\text{CDCl}_3$ );  $^{13}\text{C}$  NMR (100MHz,  $\text{CDCl}_3$ )**

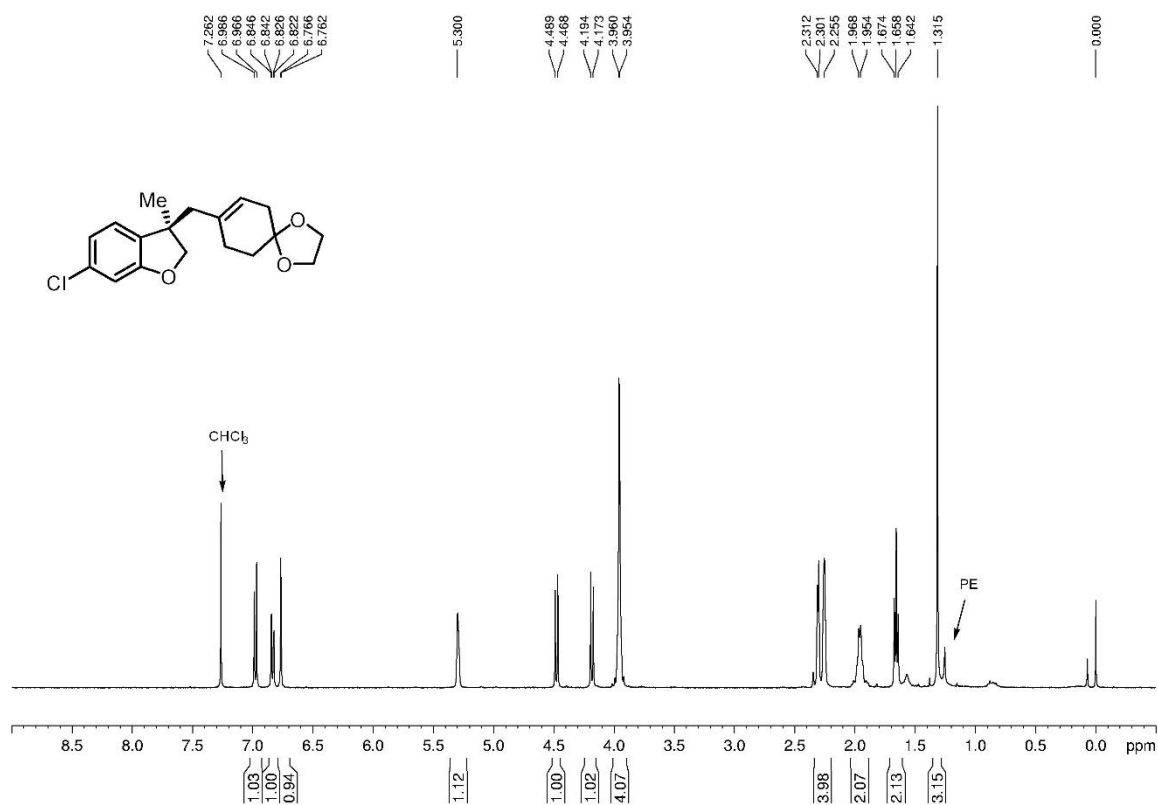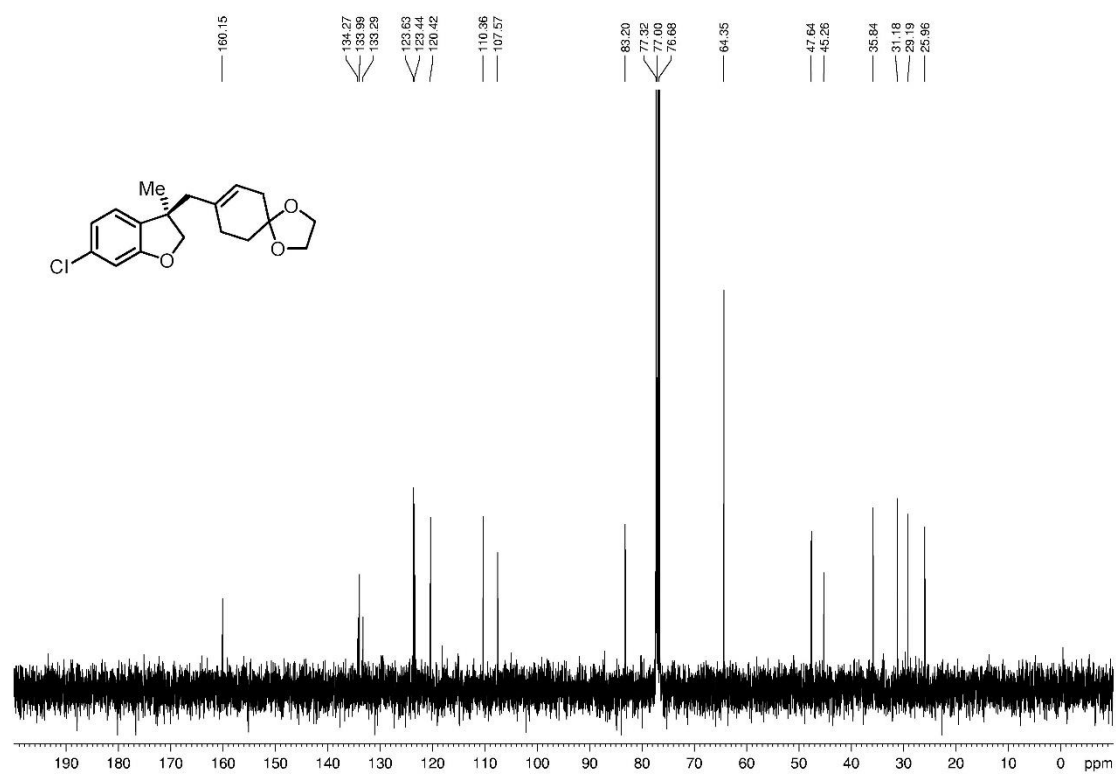

**3af;  $^1\text{H}$  NMR (400MHz,  $\text{CDCl}_3$ );  $^{13}\text{C}$  NMR (100MHz,  $\text{CDCl}_3$ )**

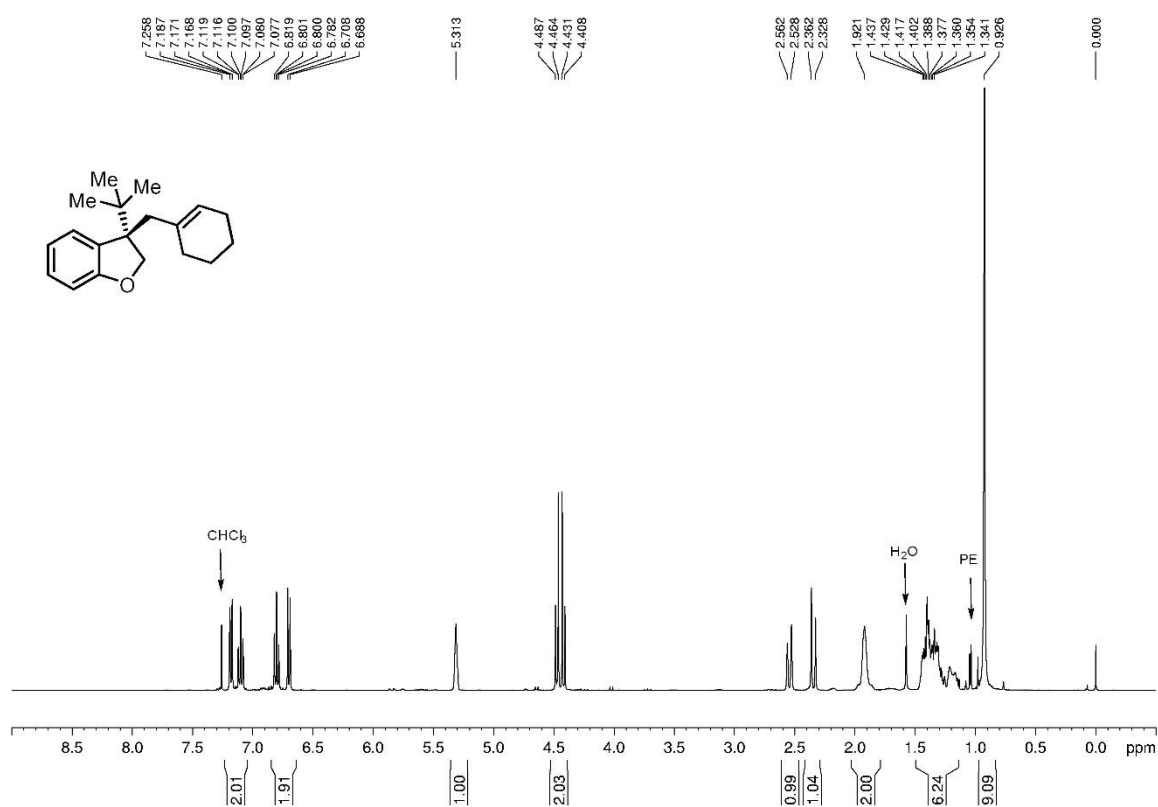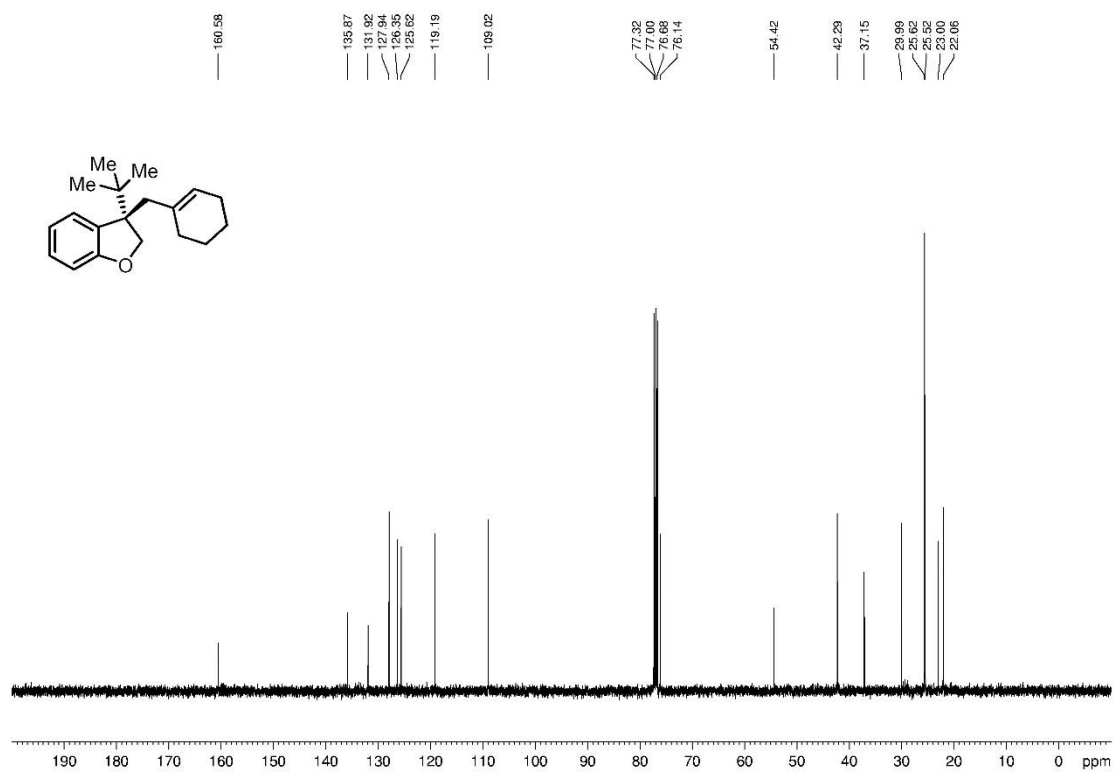

3ag;  $^1\text{H}$  NMR (400MHz,  $\text{CDCl}_3$ );  $^{13}\text{C}$  NMR (100MHz,  $\text{CDCl}_3$ )

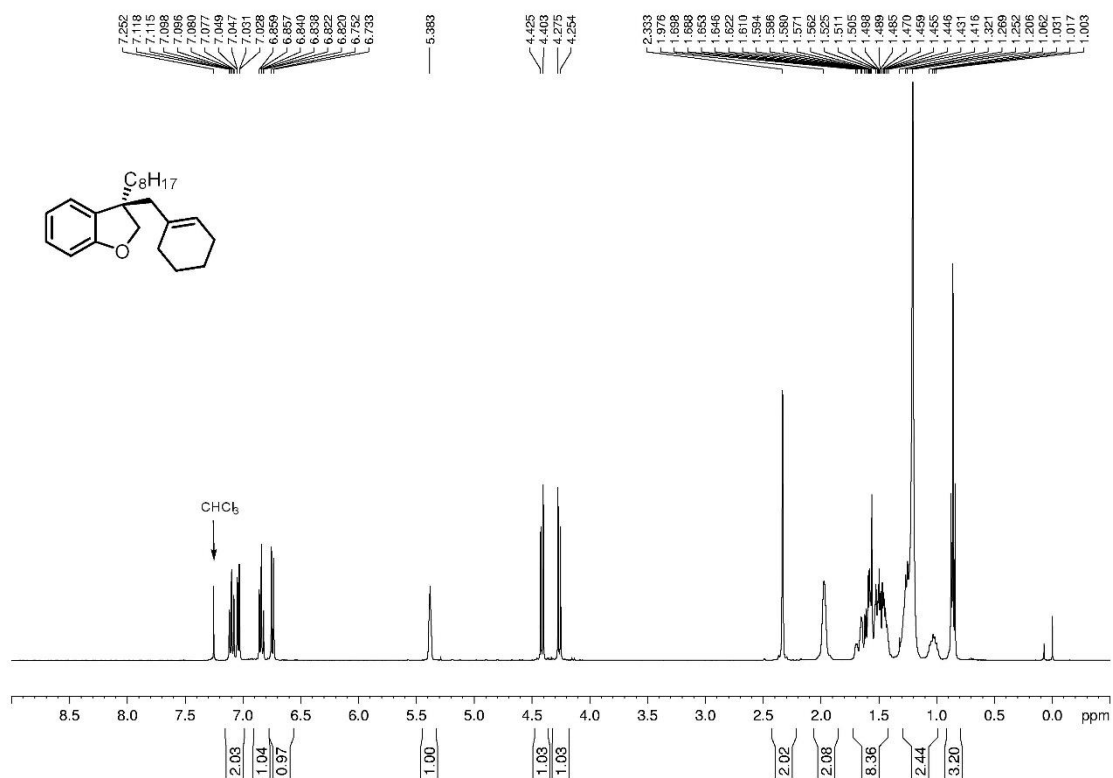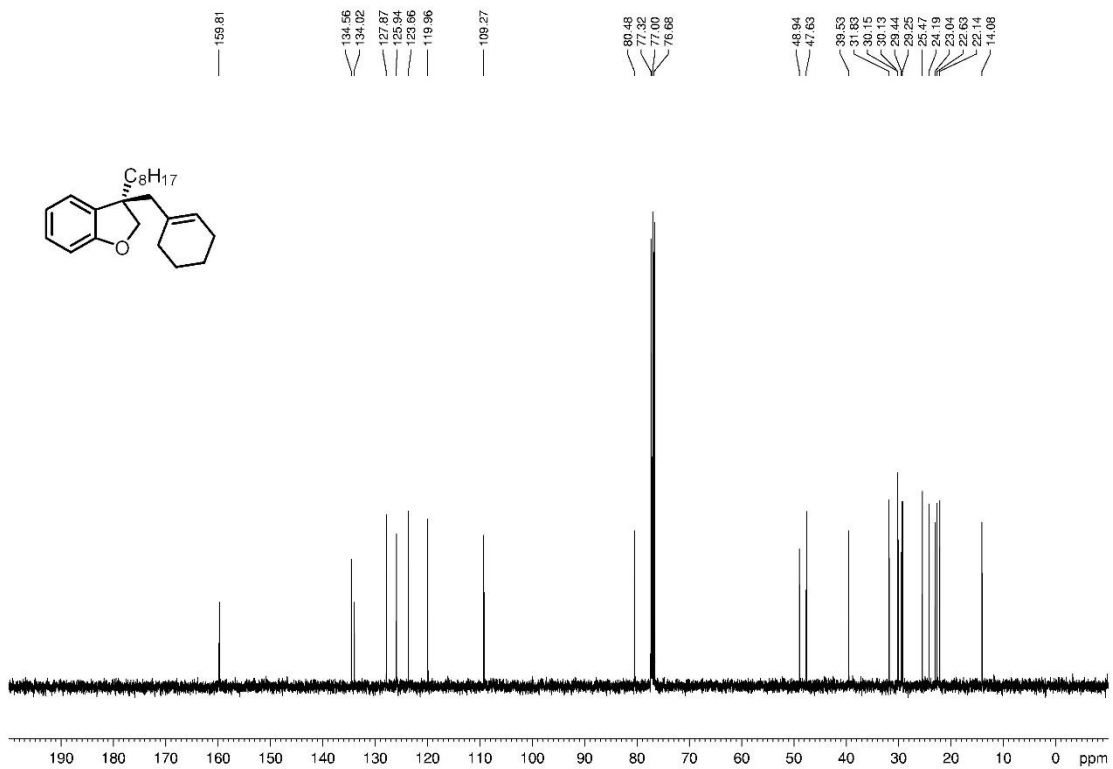

**3ah; <sup>1</sup>H NMR (400MHz, CDCl<sub>3</sub>); <sup>13</sup>C NMR (100MHz, CDCl<sub>3</sub>)**

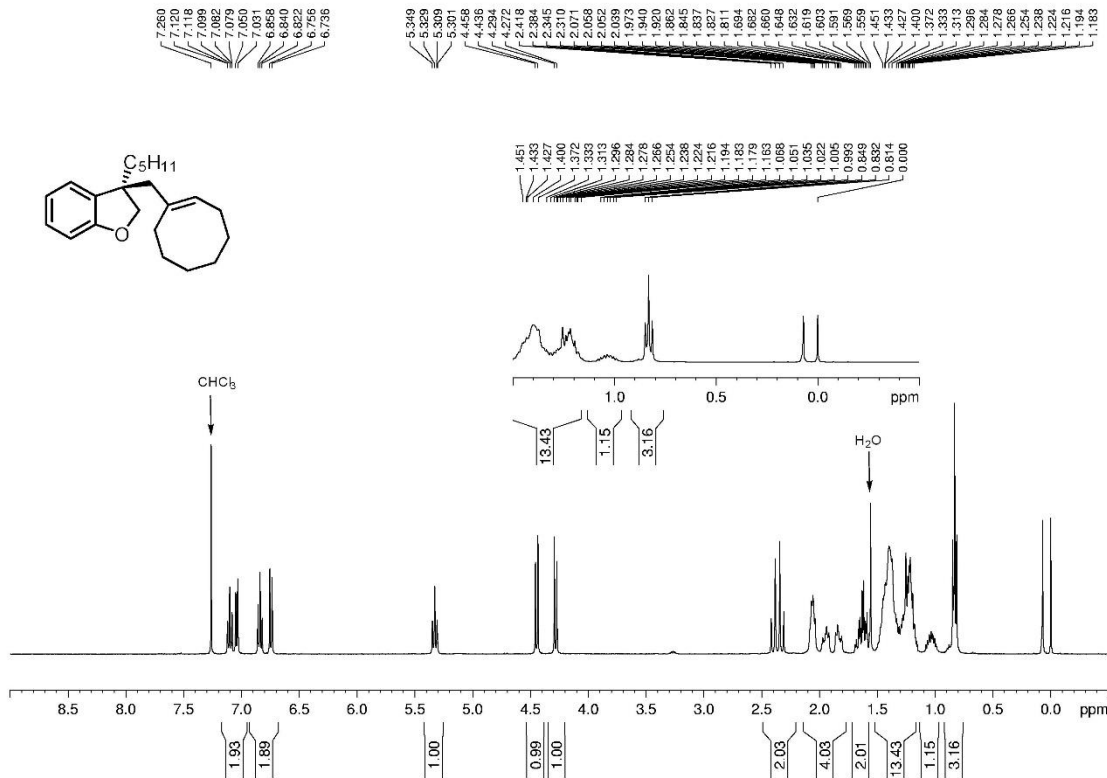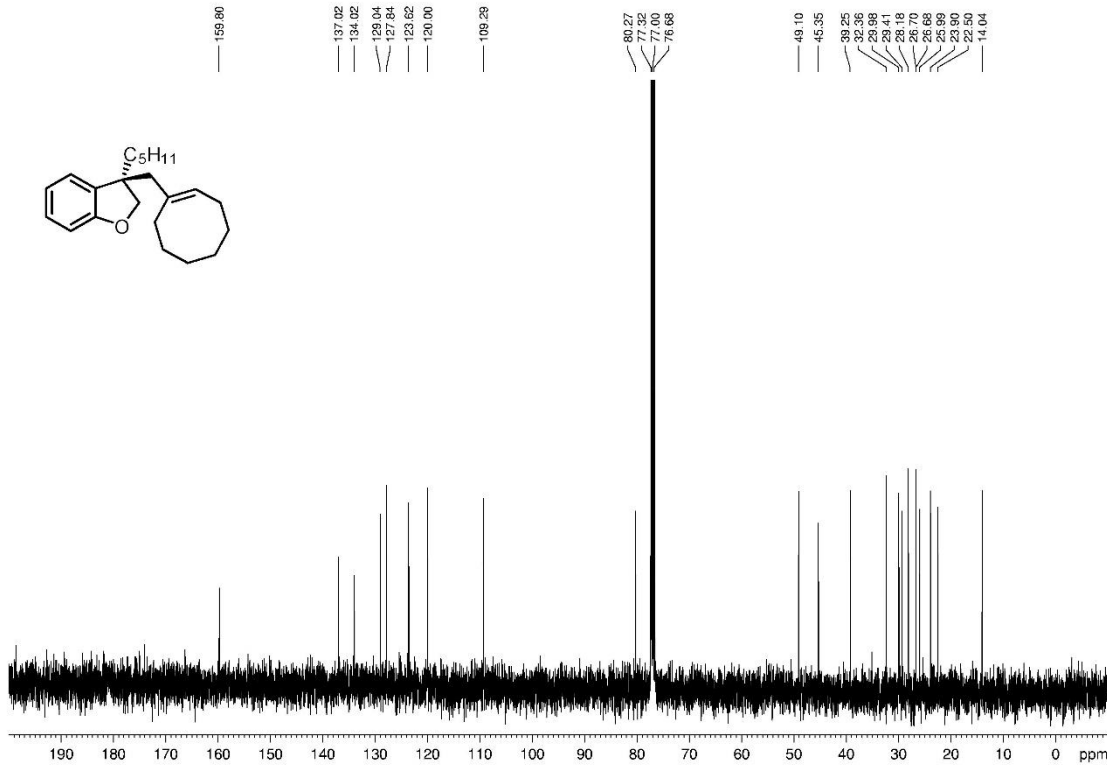

**3ai;  $^1\text{H}$  NMR (400MHz,  $\text{CDCl}_3$ );  $^{13}\text{C}$  NMR (100MHz,  $\text{CDCl}_3$ )**

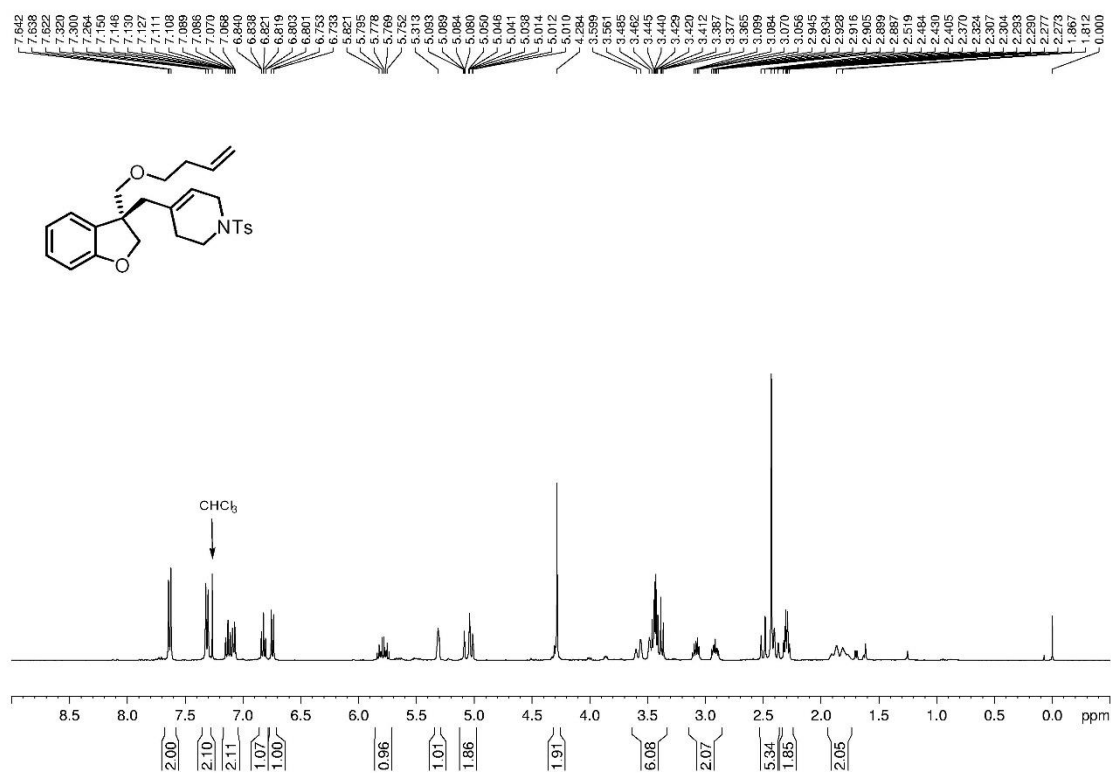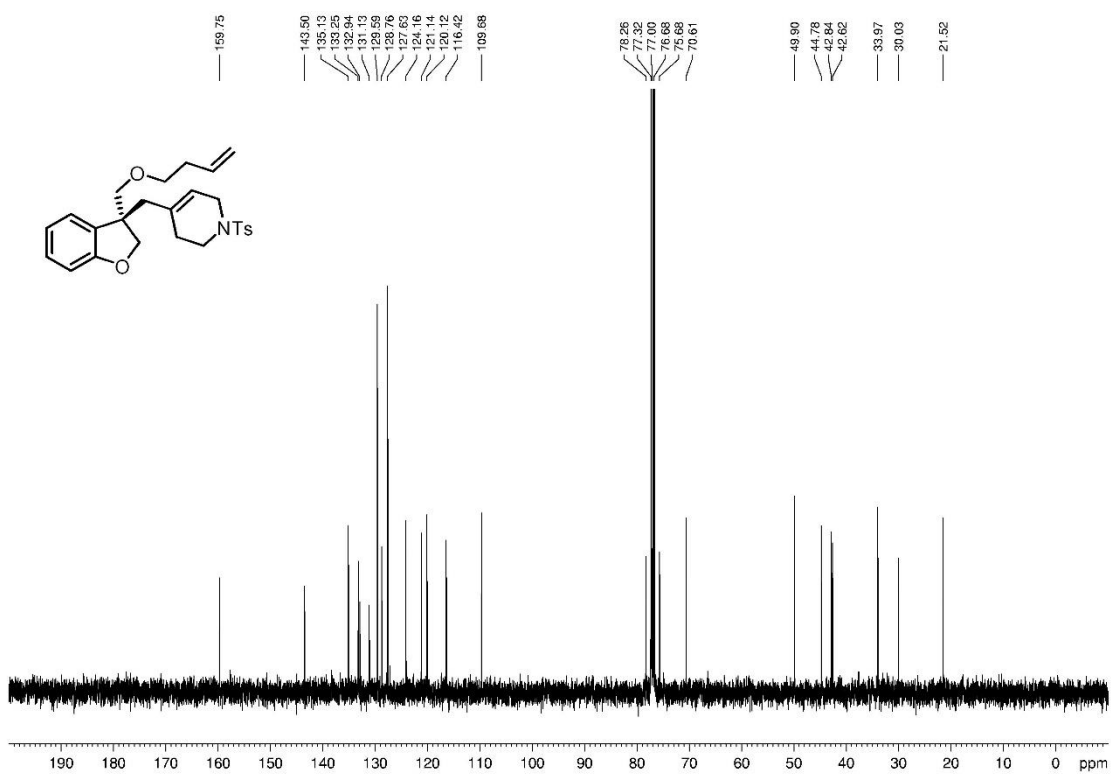



3aj;  $^1\text{H}$  NMR (400MHz,  $\text{CDCl}_3$ );  $^{13}\text{C}$  NMR (100MHz,  $\text{CDCl}_3$ )

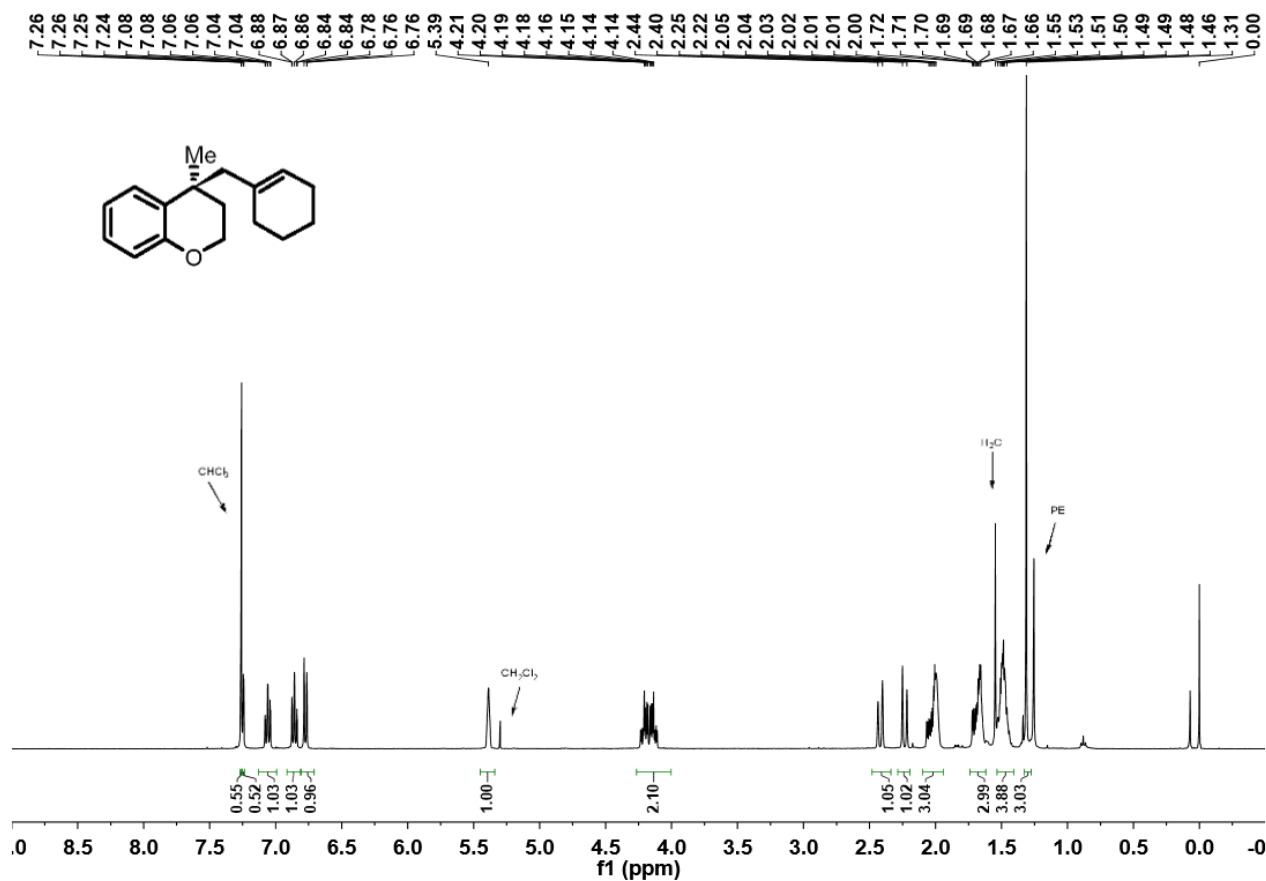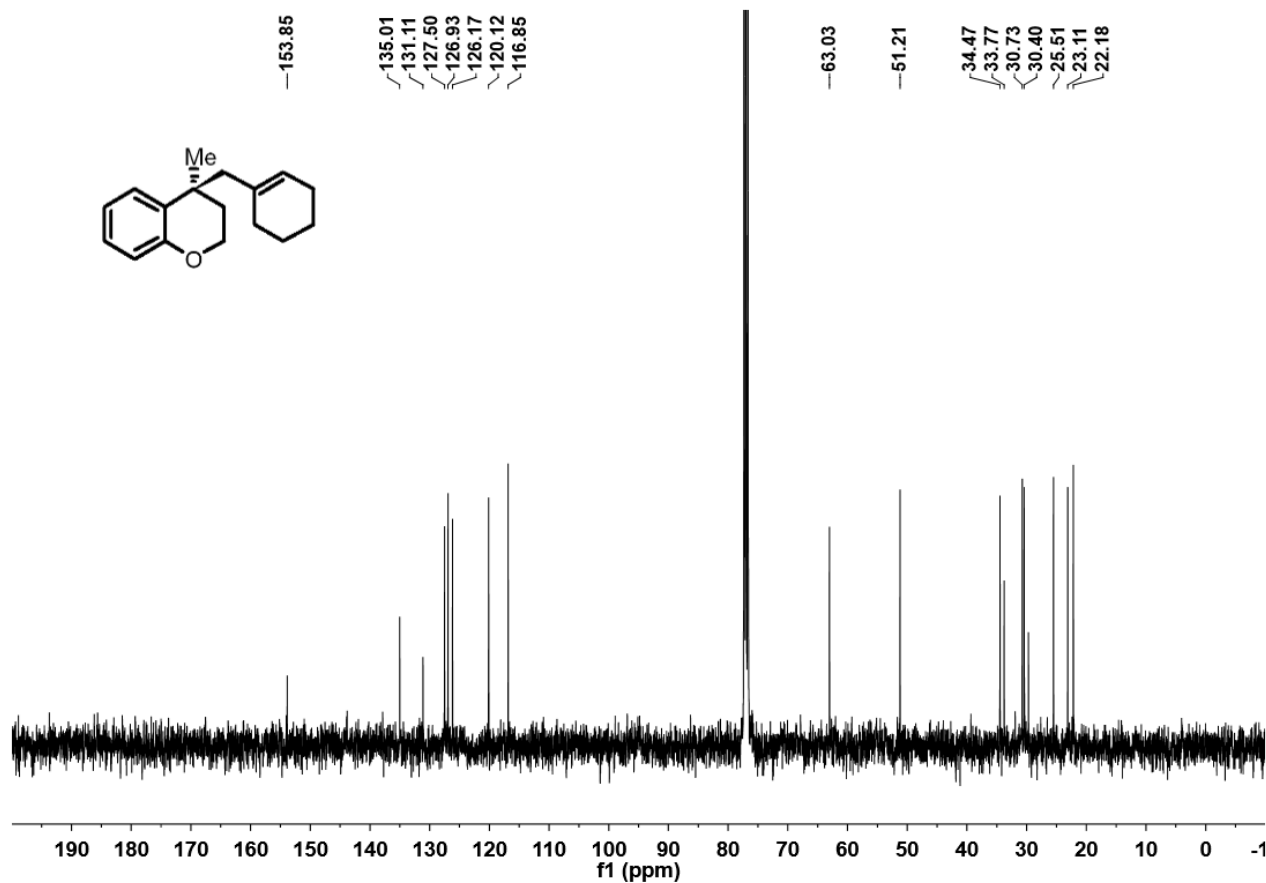

**3al;  $^1\text{H}$  NMR (400MHz,  $\text{CDCl}_3$ );  $^{13}\text{C}$  NMR (100MHz,  $\text{CDCl}_3$ )**

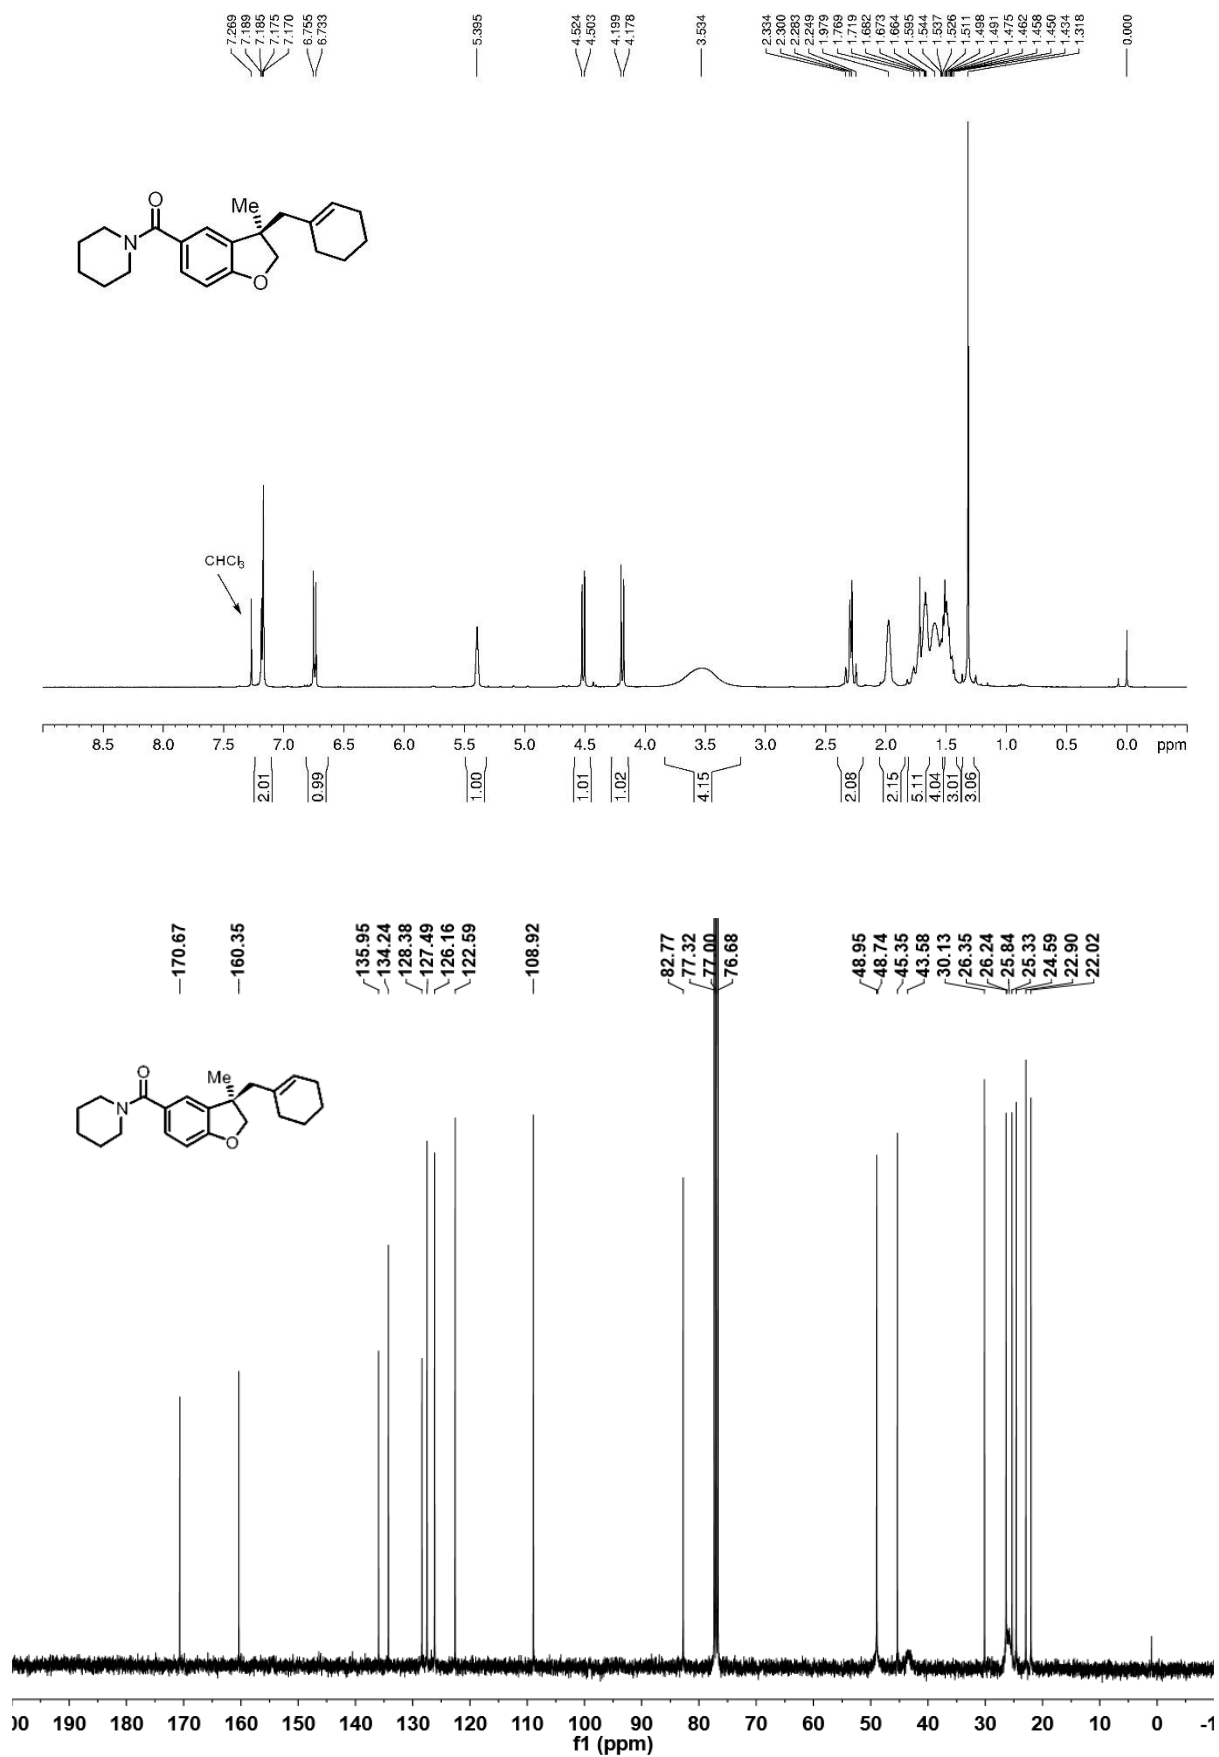

3am;  $^1\text{H}$  NMR (400MHz,  $\text{CDCl}_3$ );  $^{13}\text{C}$  NMR (100MHz,  $\text{CDCl}_3$ )

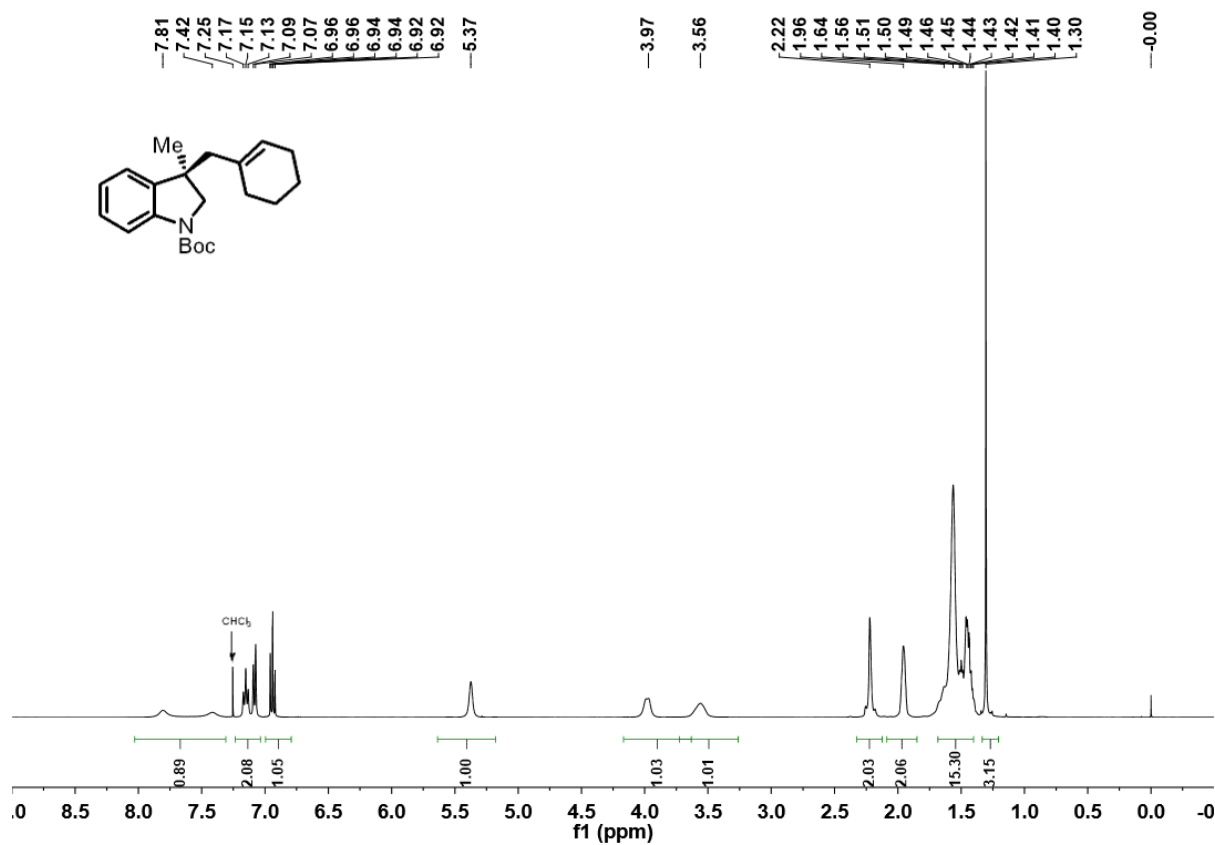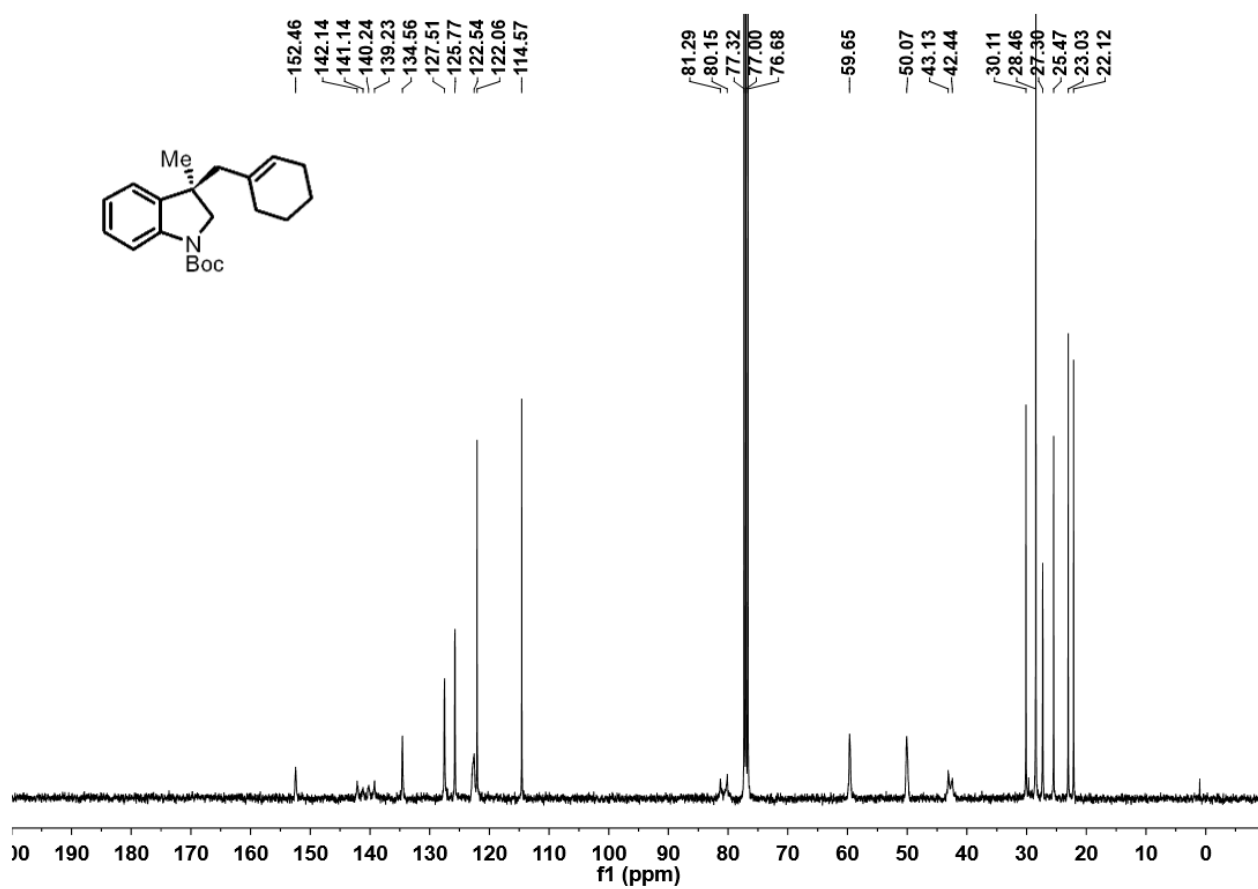

3an;  $^1\text{H}$  NMR (400MHz,  $\text{CDCl}_3$ );  $^{13}\text{C}$  NMR (100MHz,  $\text{CDCl}_3$ )

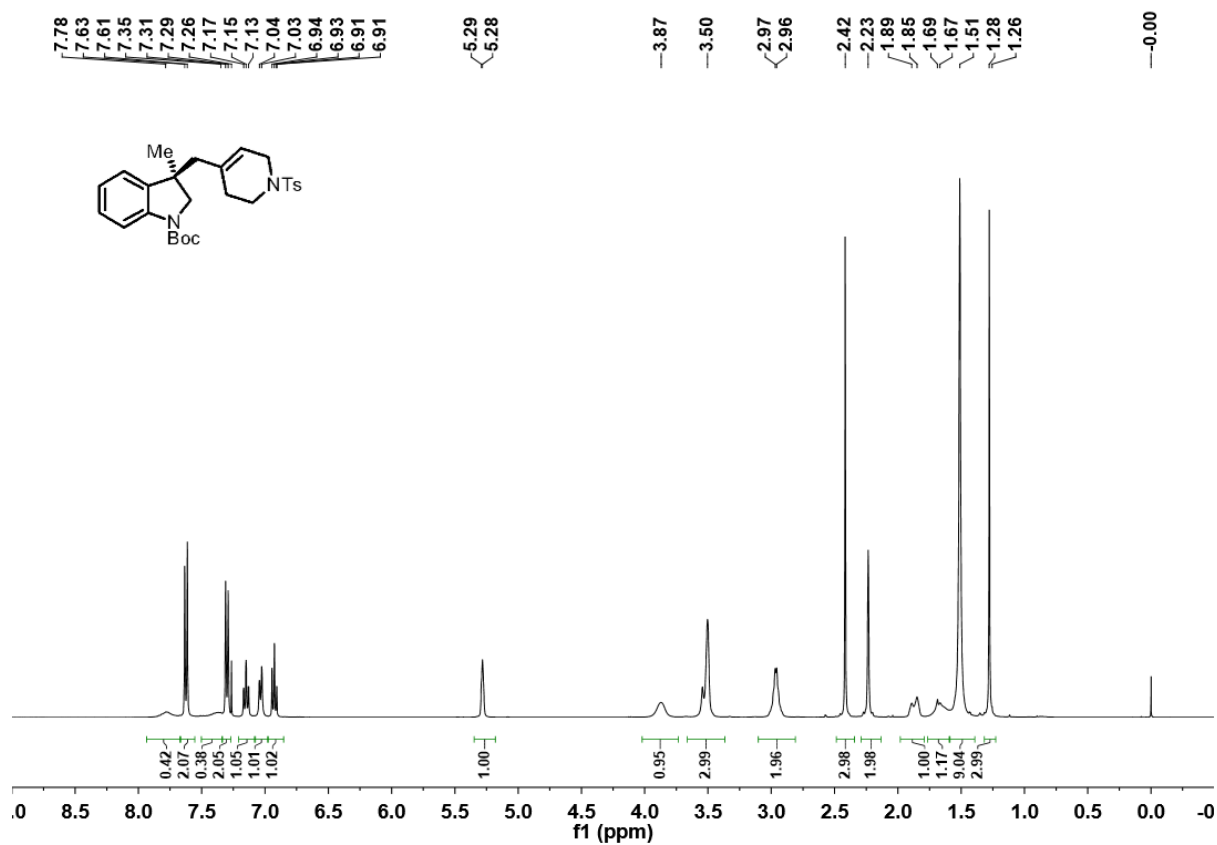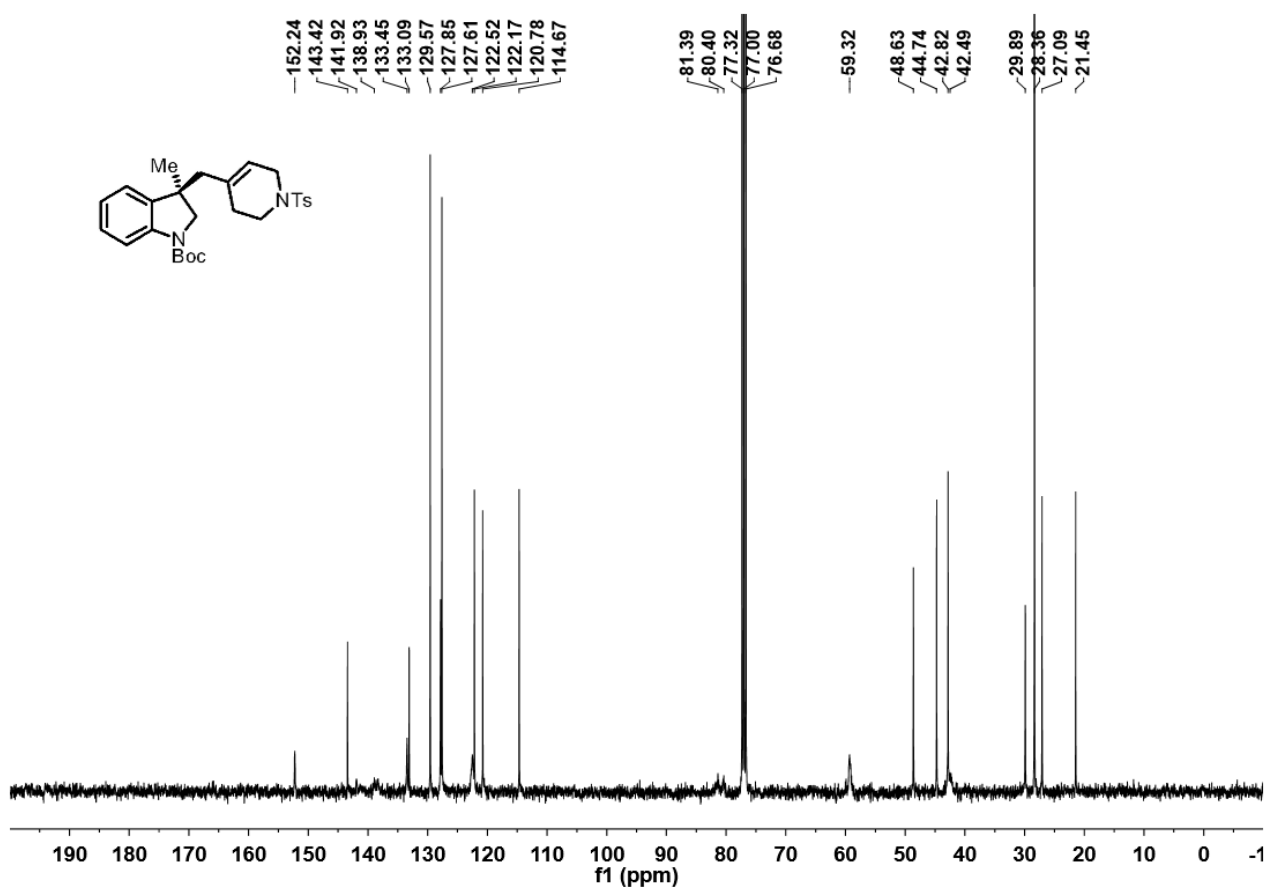

3ao;  $^1\text{H}$  NMR (400MHz,  $\text{CDCl}_3$ );  $^{13}\text{C}$  NMR (150MHz,  $\text{CDCl}_3$ )

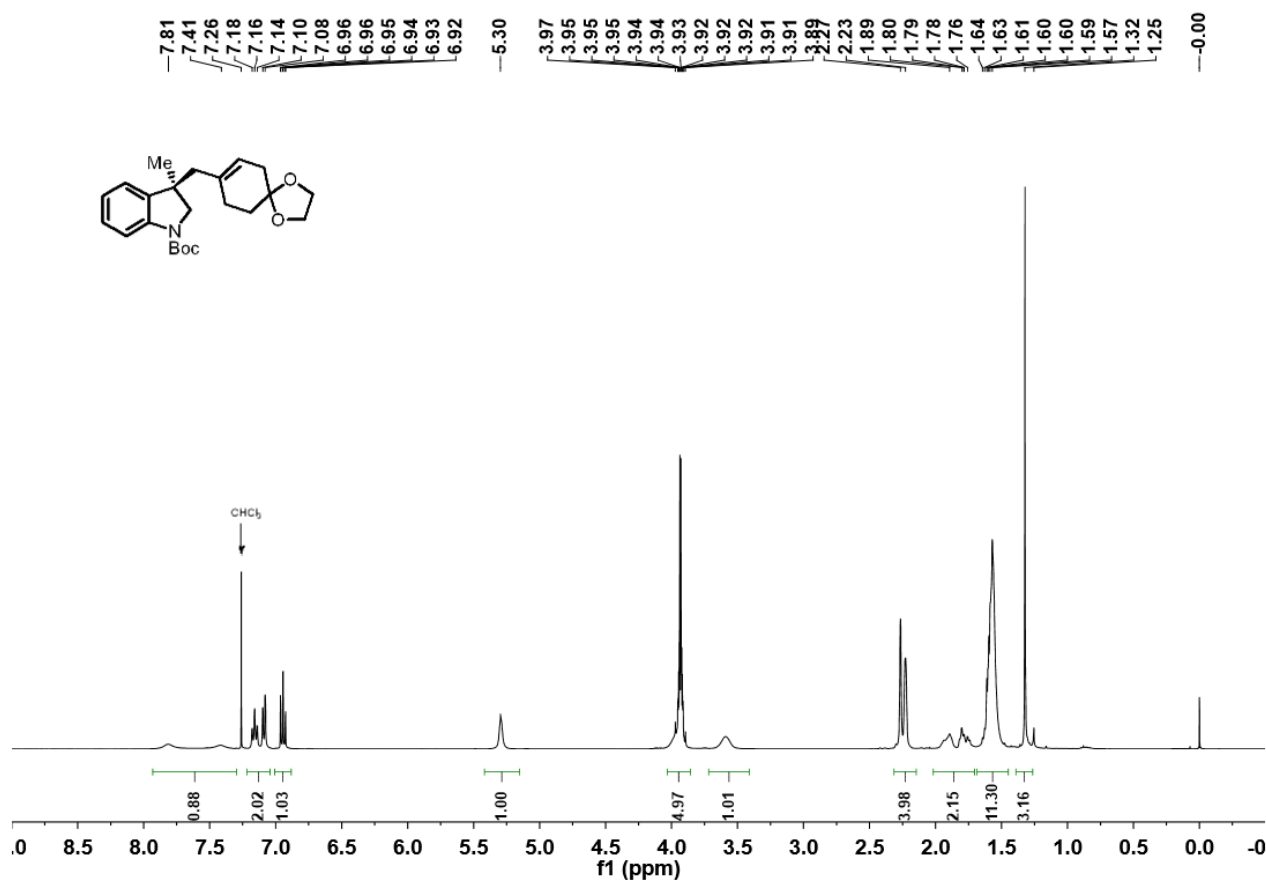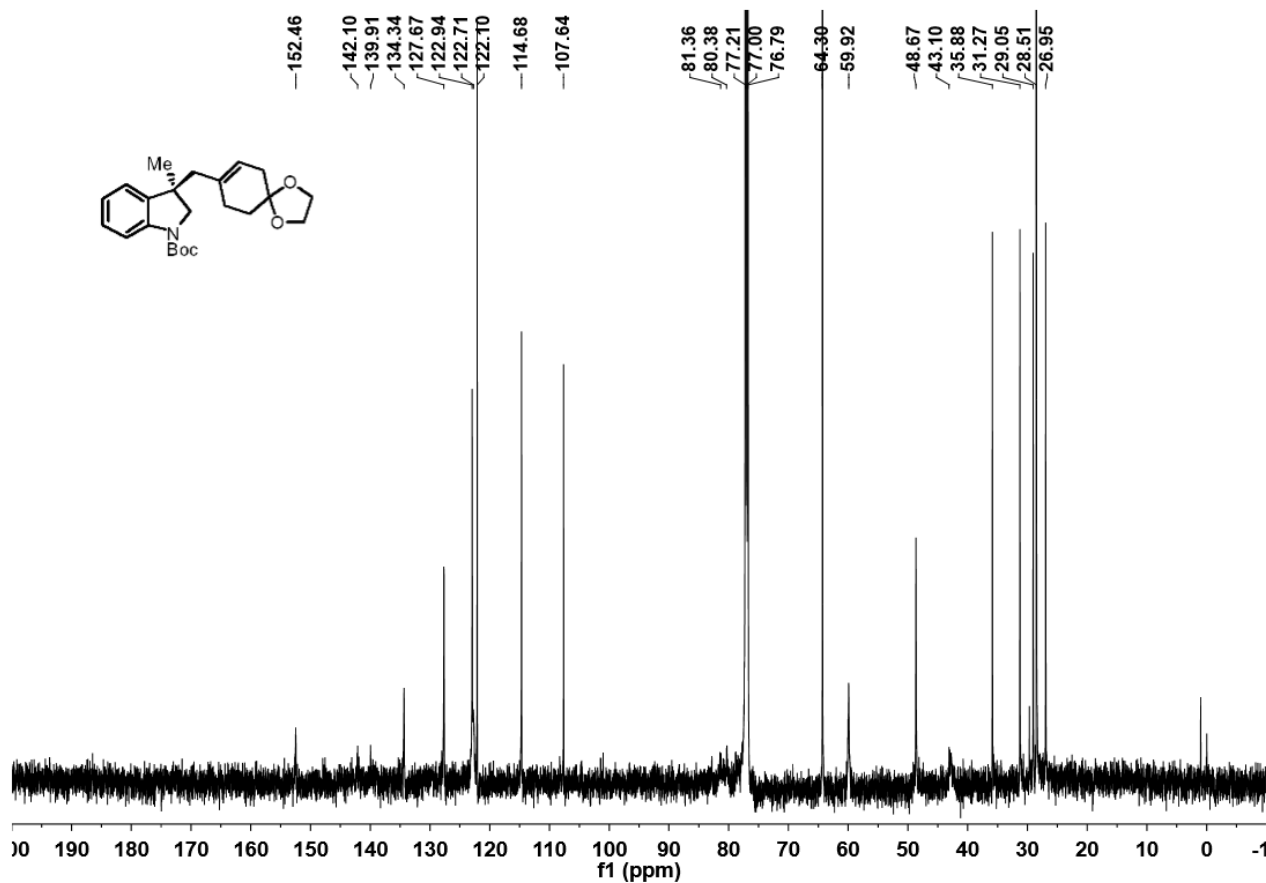

**3ap;  $^1\text{H}$  NMR (400MHz,  $\text{CDCl}_3$ );  $^{13}\text{C}$  NMR (100MHz,  $\text{CDCl}_3$ )**

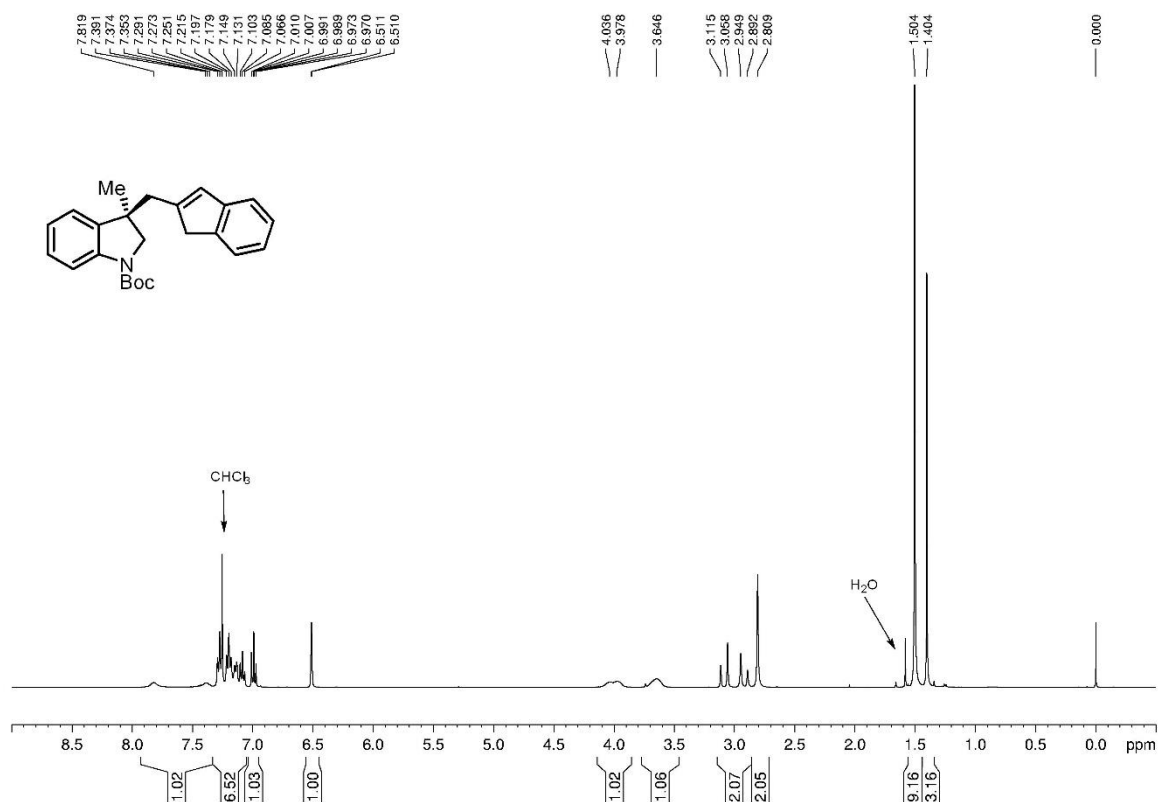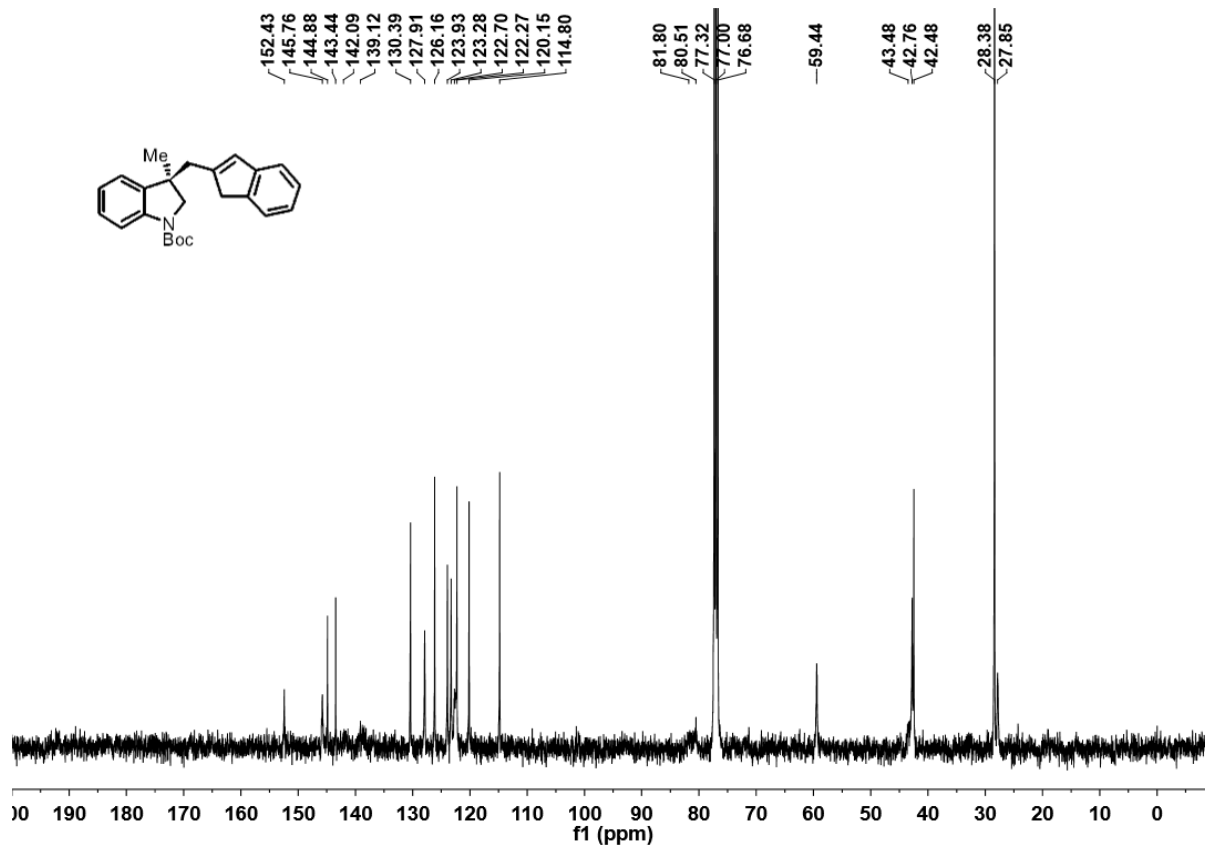

3aq;  $^1\text{H}$  NMR (400MHz,  $\text{CDCl}_3$ );  $^{13}\text{C}$  NMR (100MHz,  $\text{CDCl}_3$ )

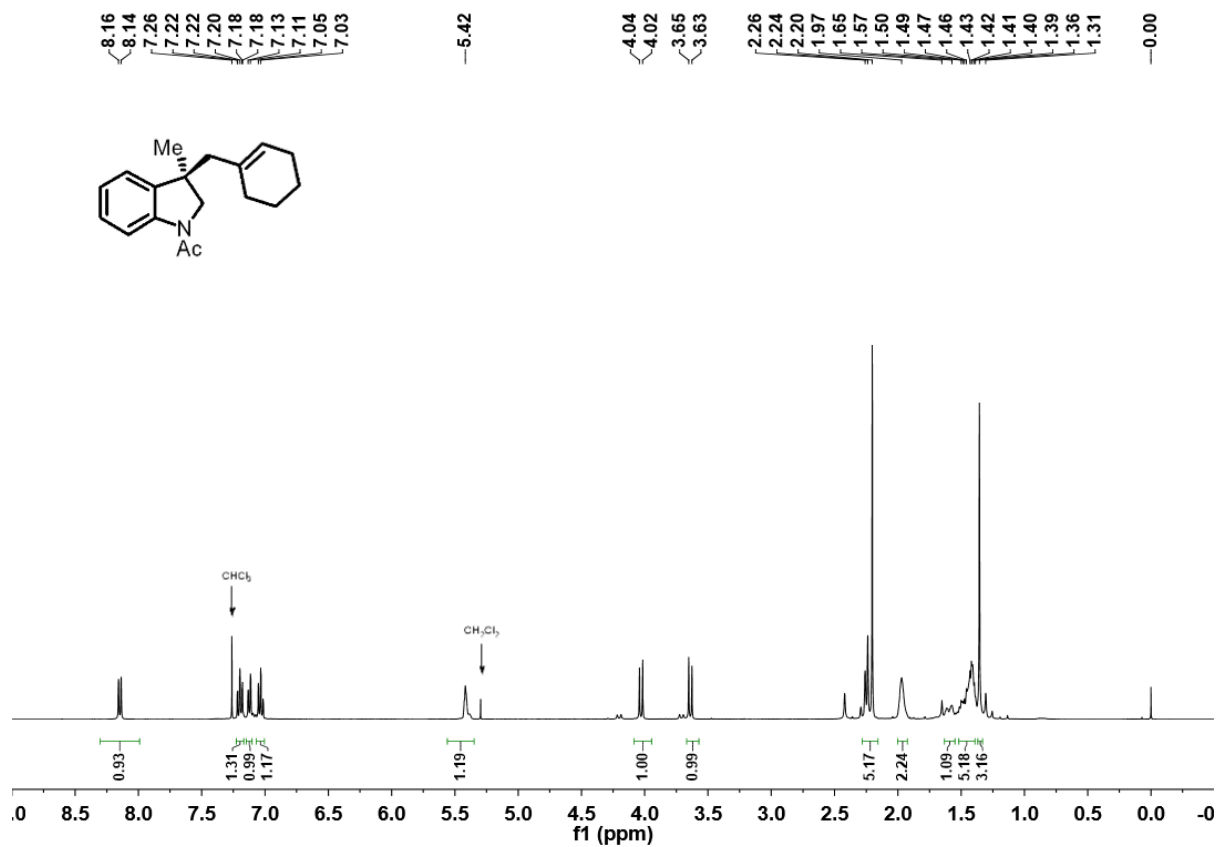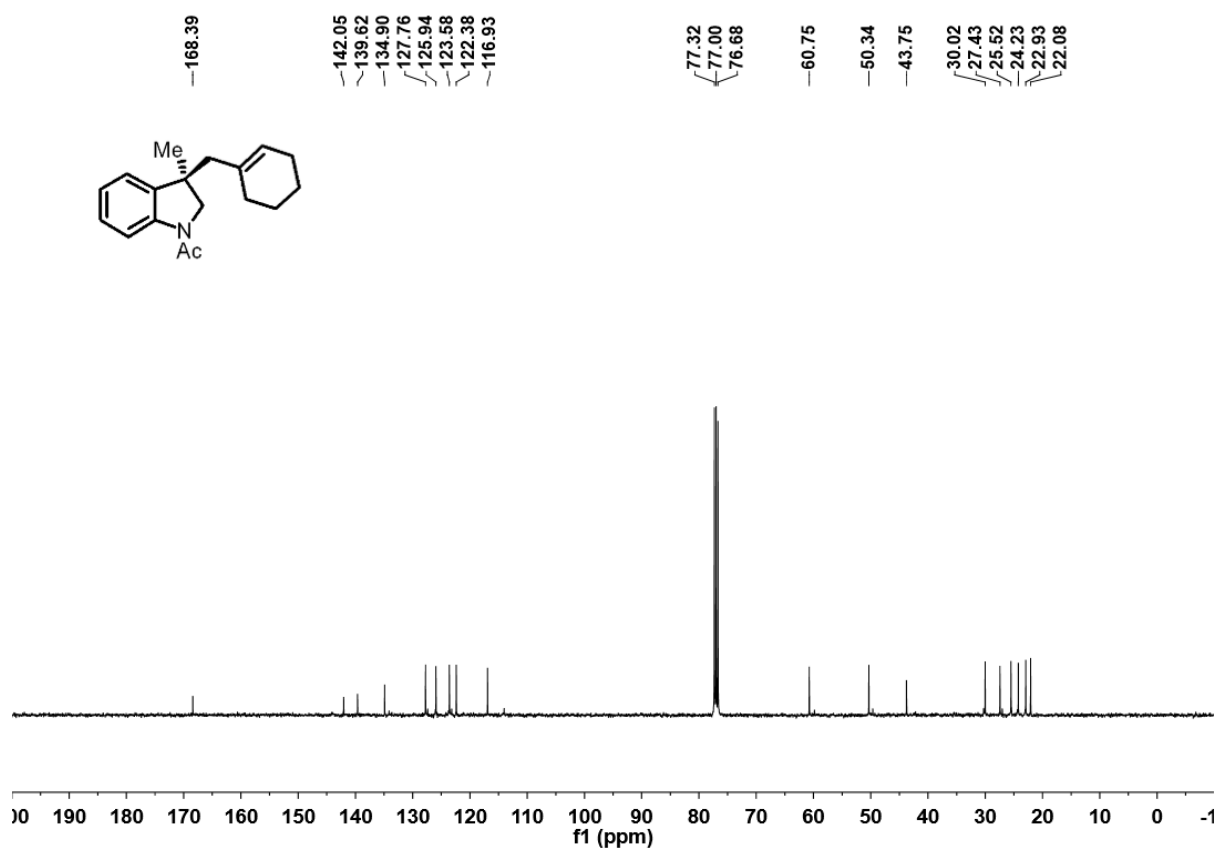

3ar;  $^1\text{H}$  NMR (600MHz,  $\text{CDCl}_3$ );  $^{13}\text{C}$  NMR (150MHz,  $\text{CDCl}_3$ )

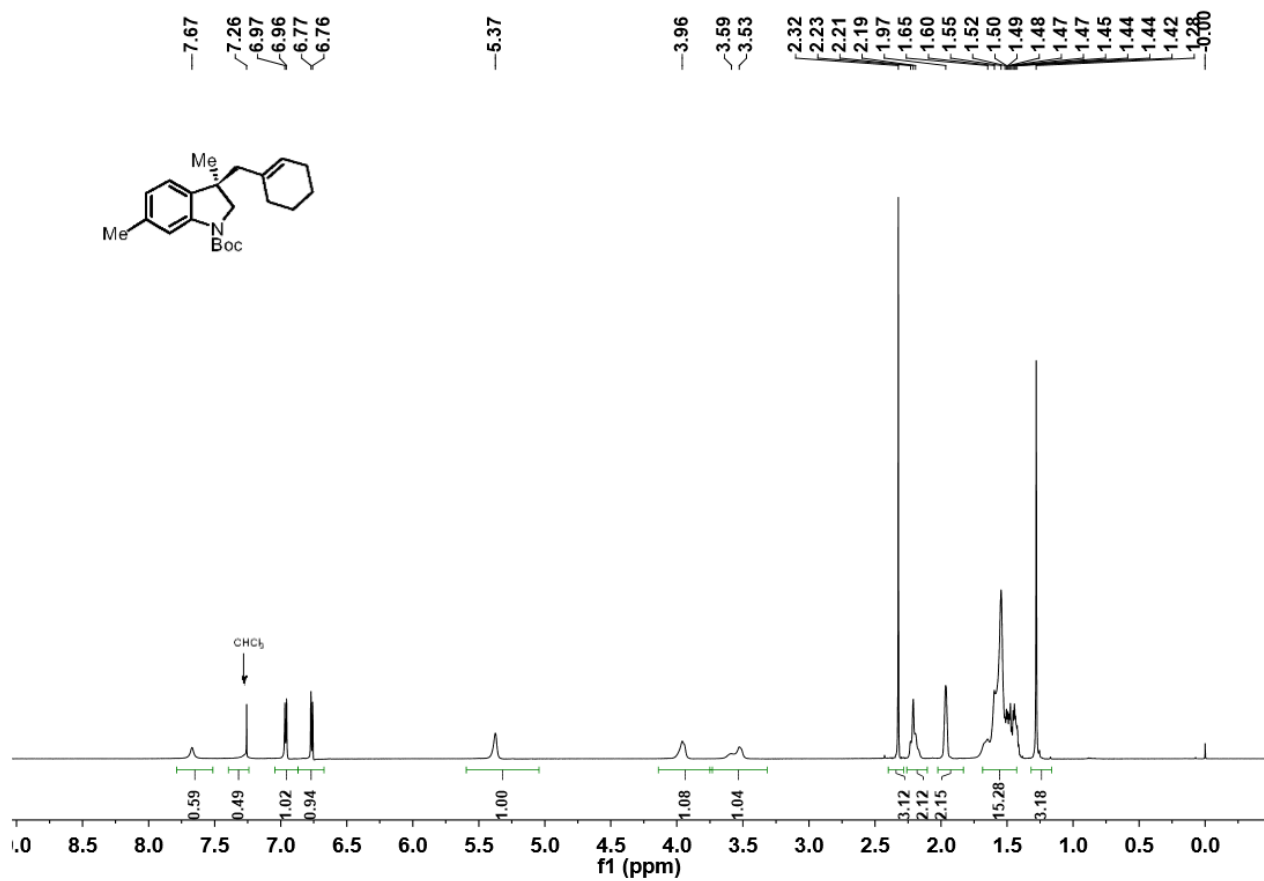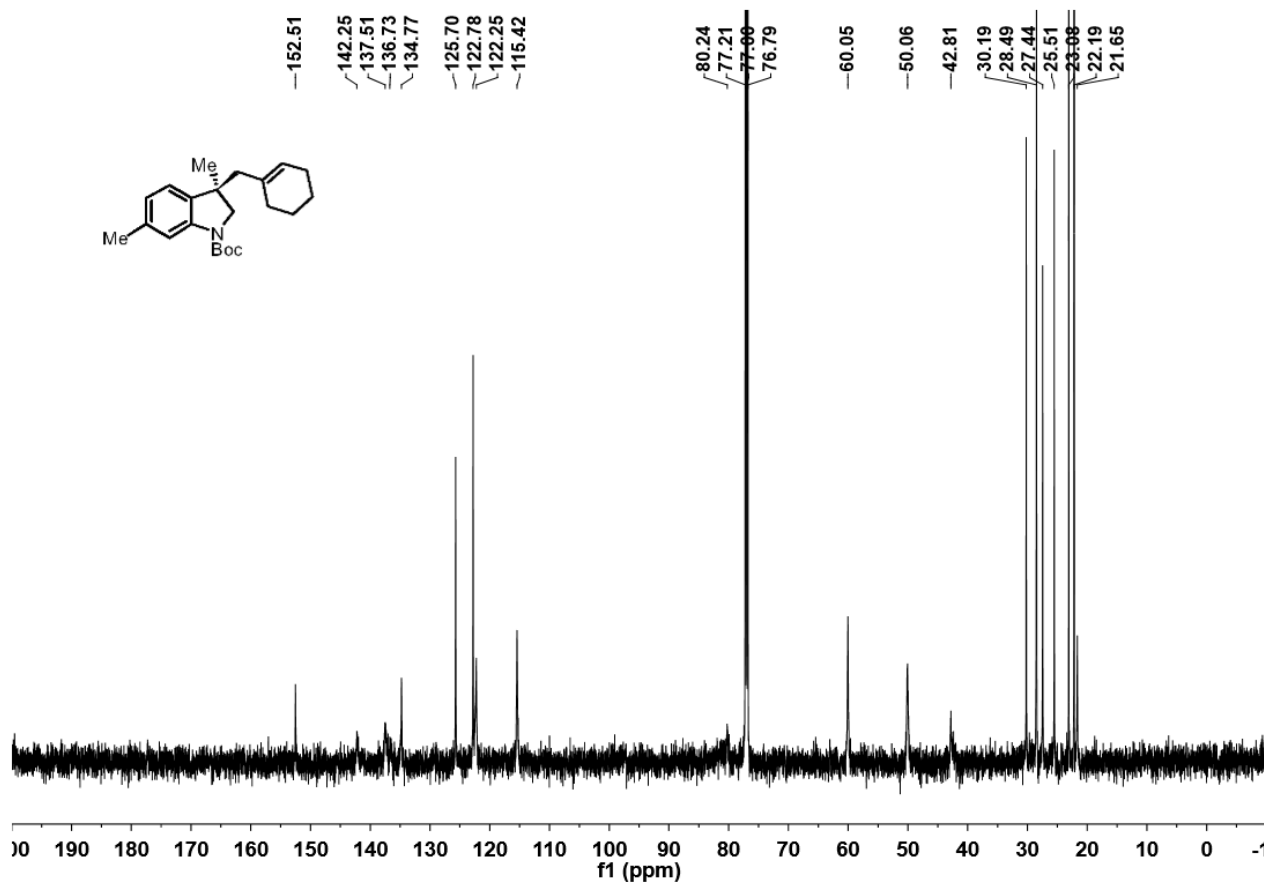



3as;  $^1\text{H}$  NMR (400MHz,  $\text{CDCl}_3$ );  $^{13}\text{C}$  NMR (100MHz,  $\text{CDCl}_3$ )

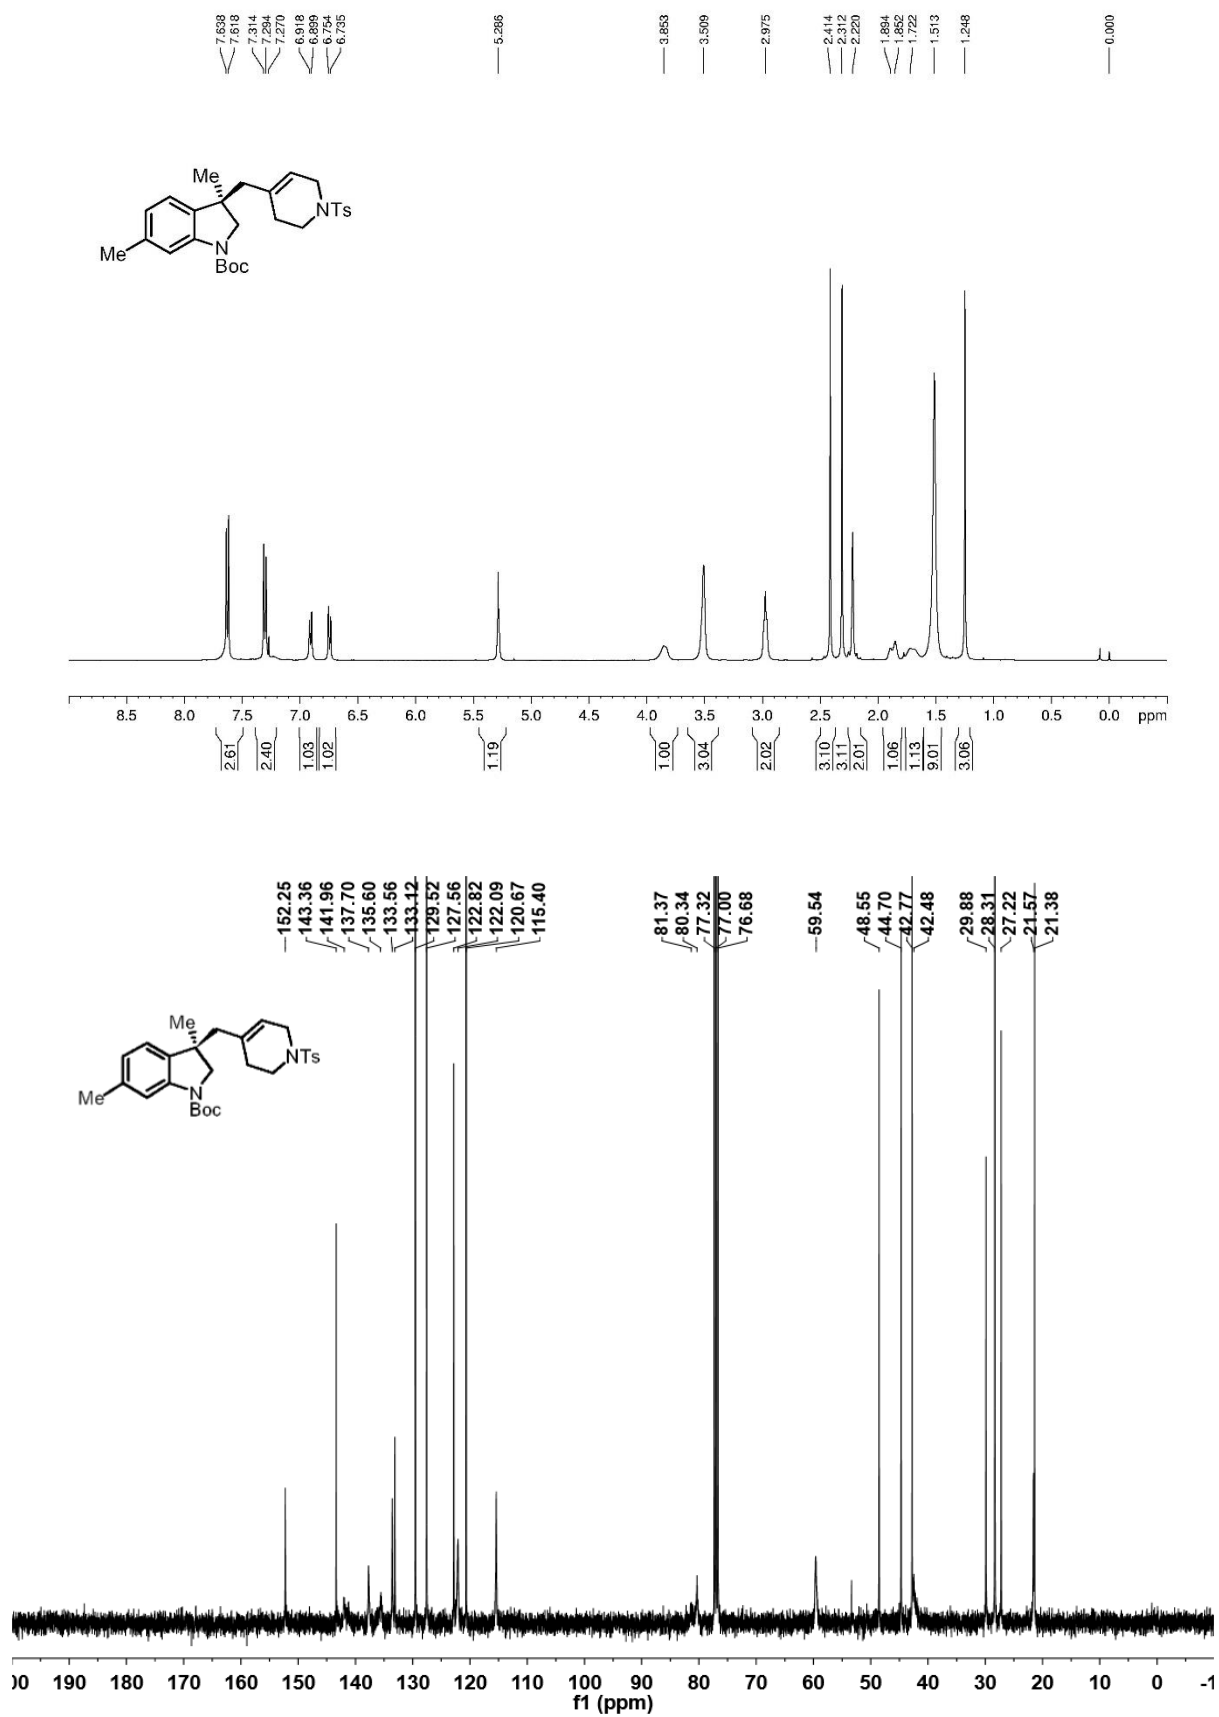

3at;  $^1\text{H}$  NMR (400MHz,  $\text{CDCl}_3$ );  $^{13}\text{C}$  NMR (100MHz,  $\text{CDCl}_3$ )

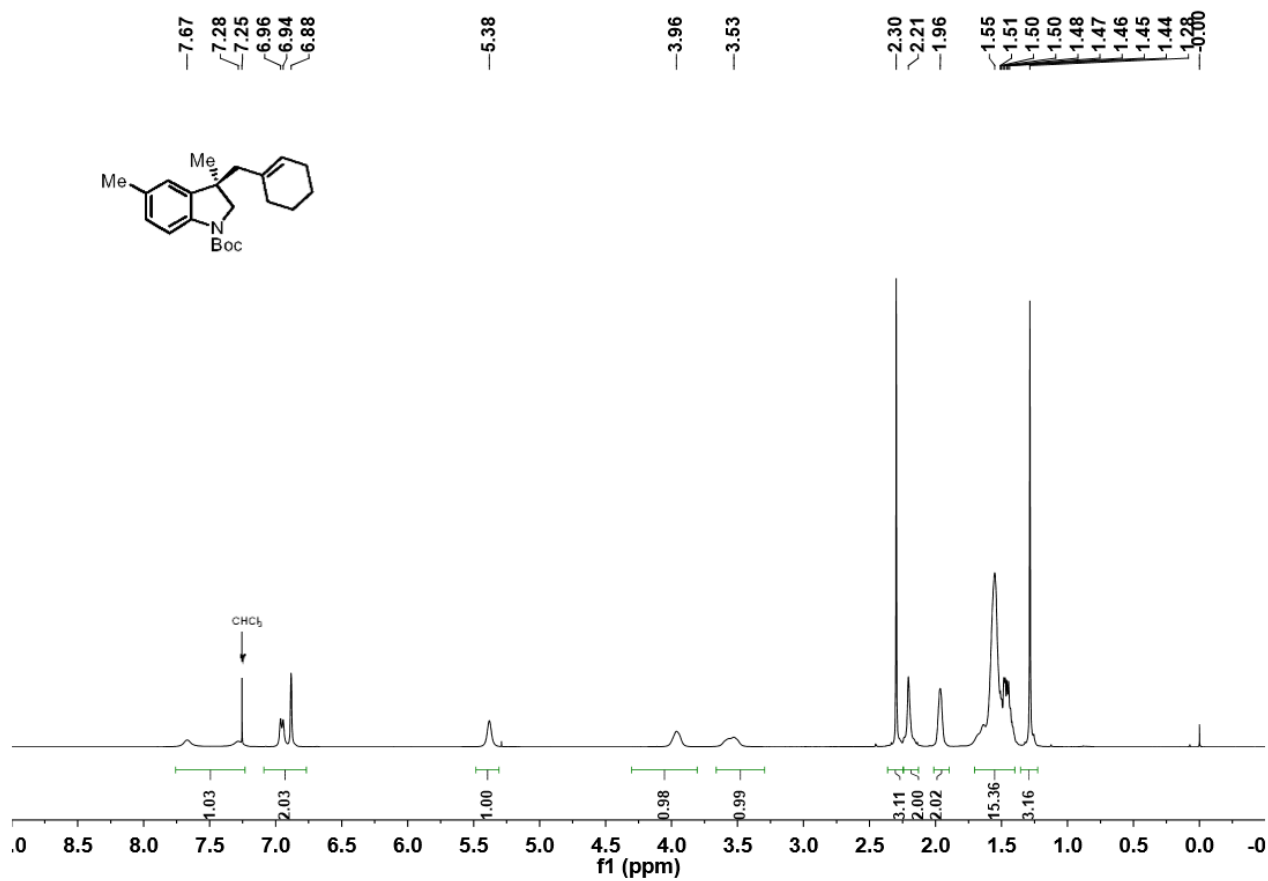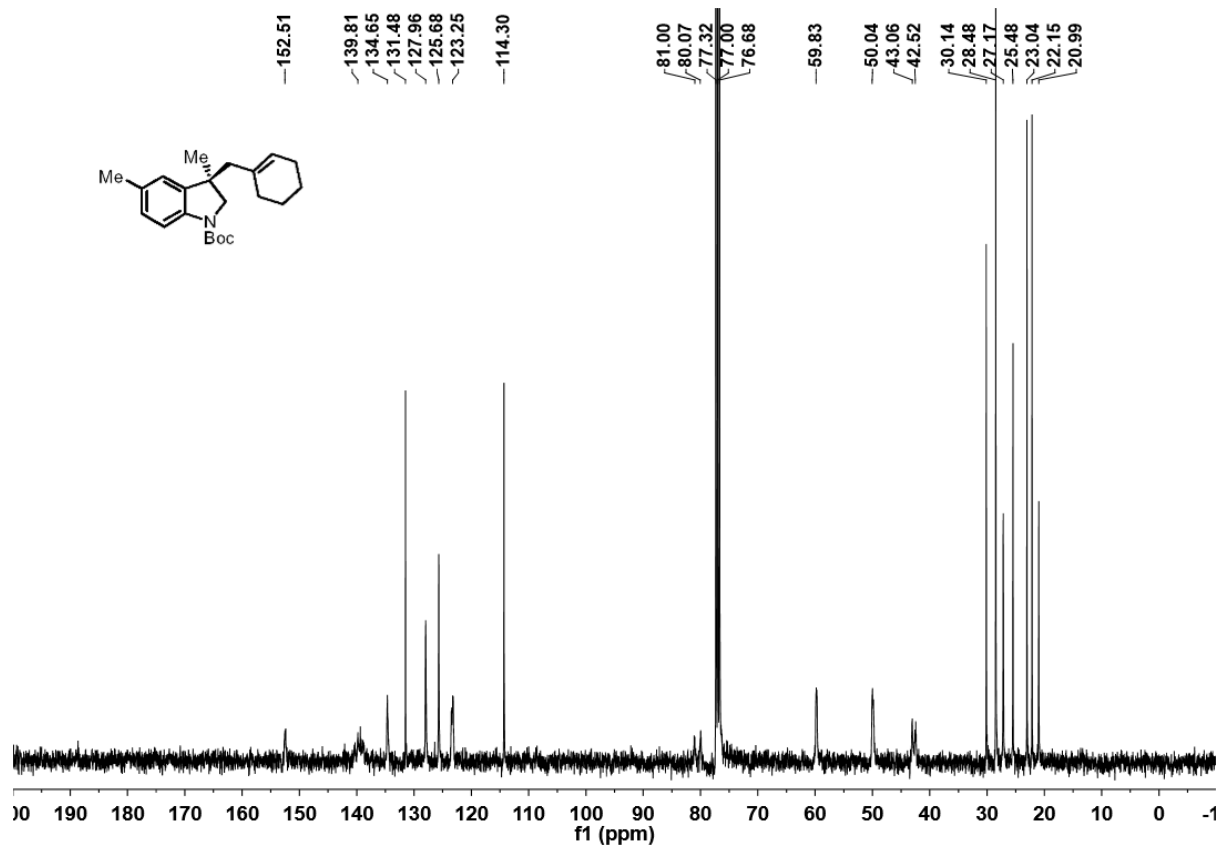

3au;  $^1\text{H}$  NMR (400MHz,  $\text{CDCl}_3$ );  $^{13}\text{C}$  NMR (100MHz,  $\text{CDCl}_3$ )

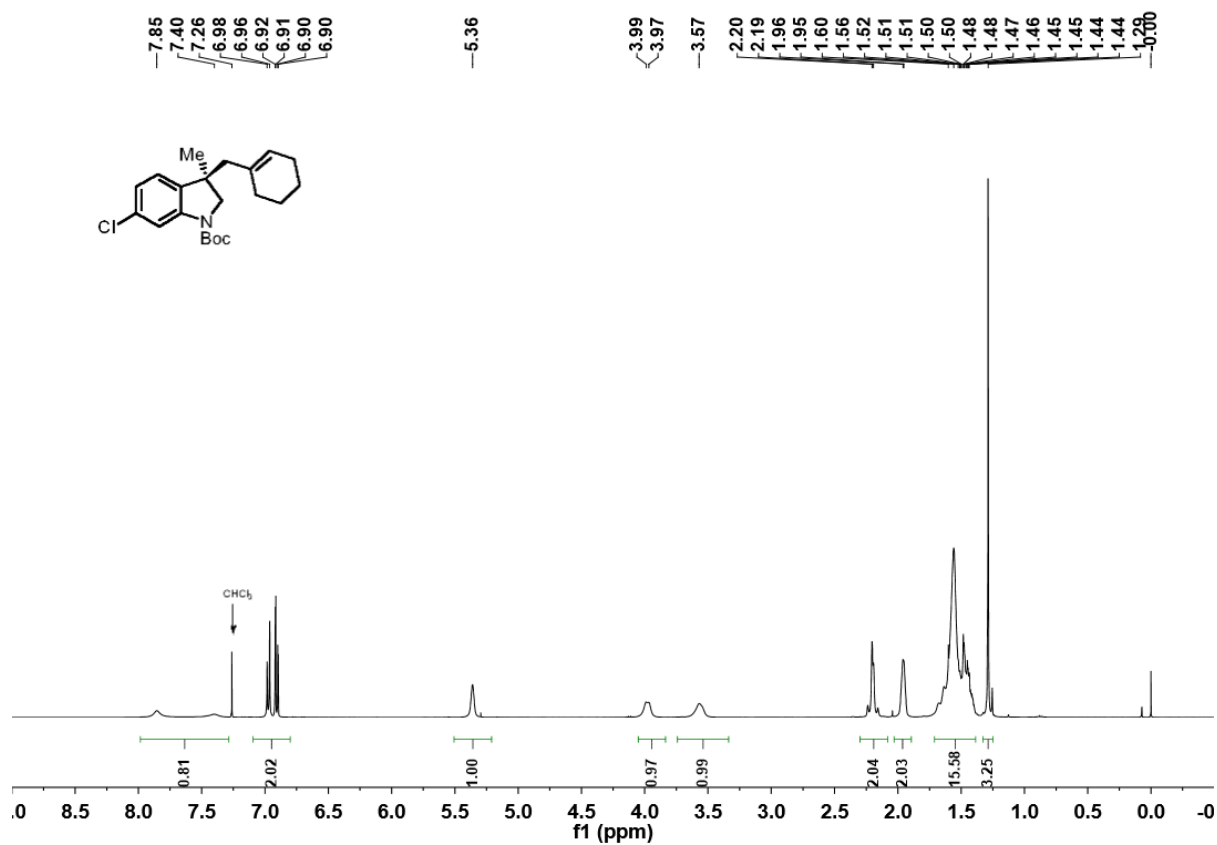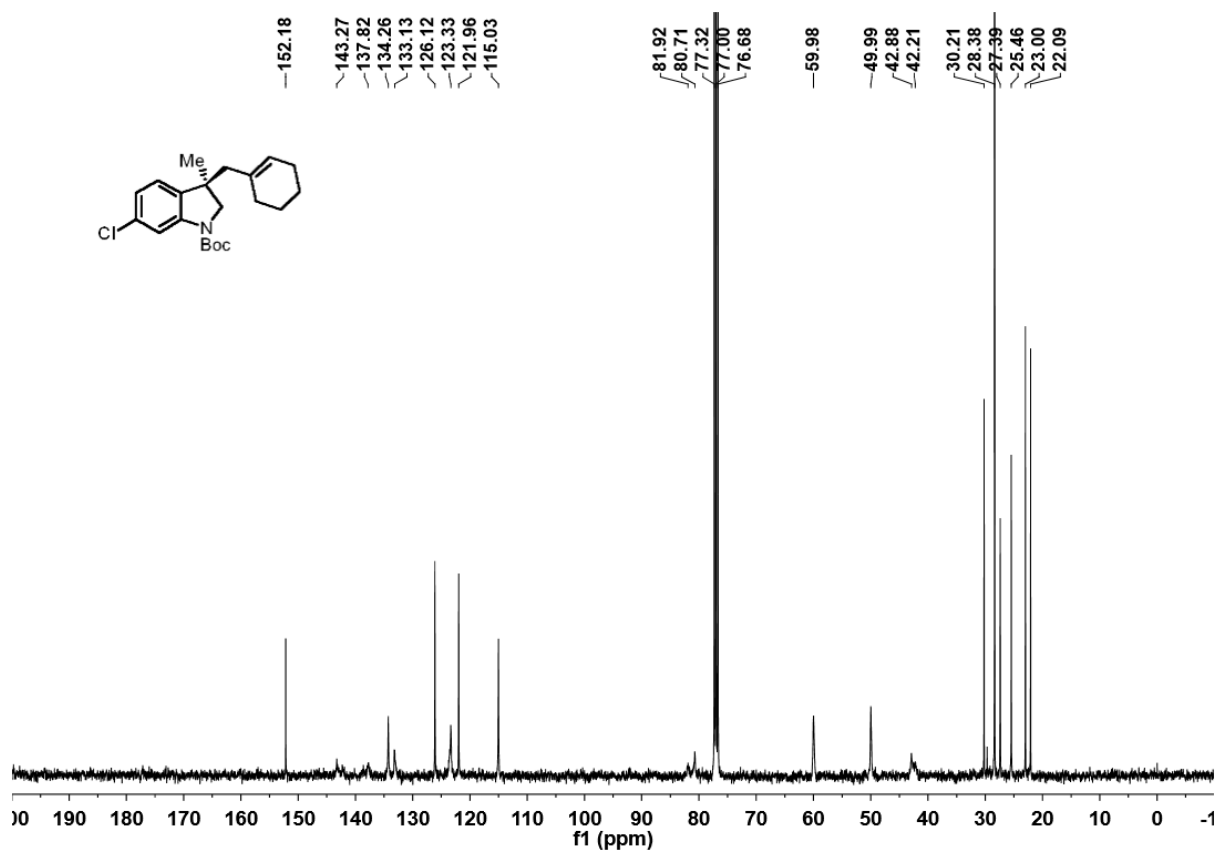

**3av;  $^1\text{H}$  NMR (400MHz,  $\text{CDCl}_3$ );  $^{13}\text{C}$  NMR (100MHz,  $\text{CDCl}_3$ )**

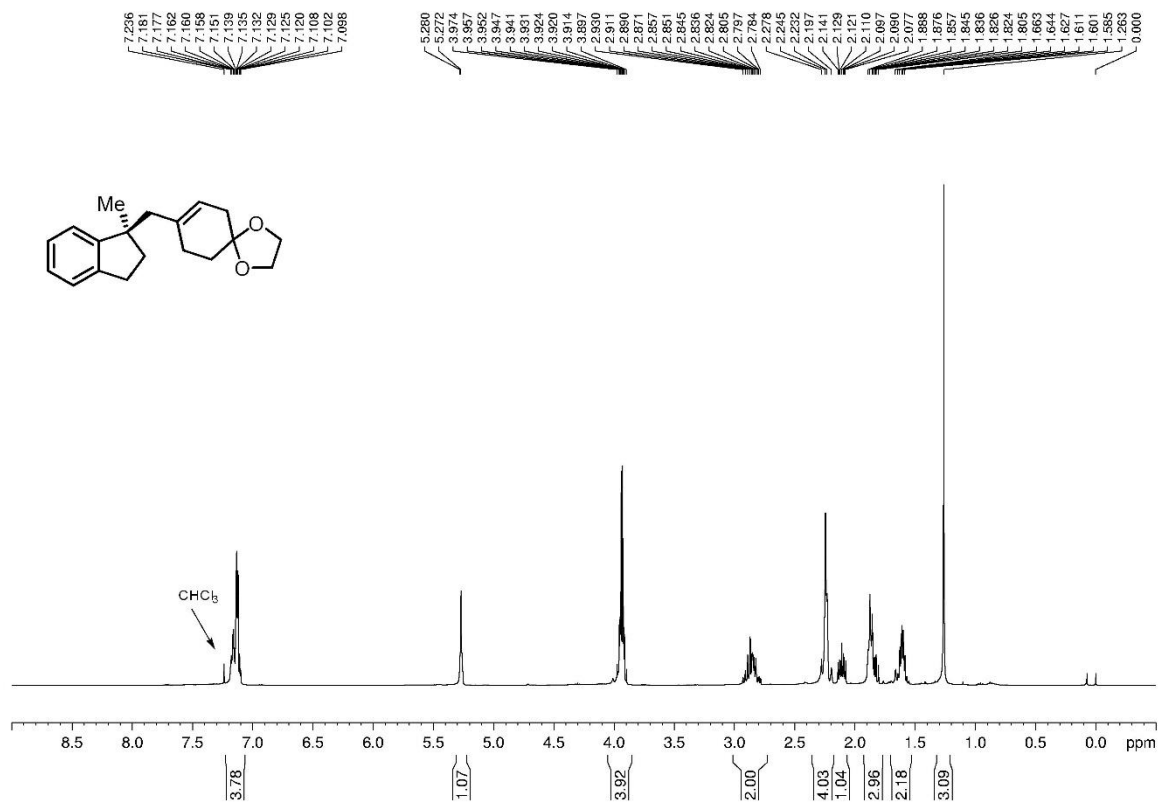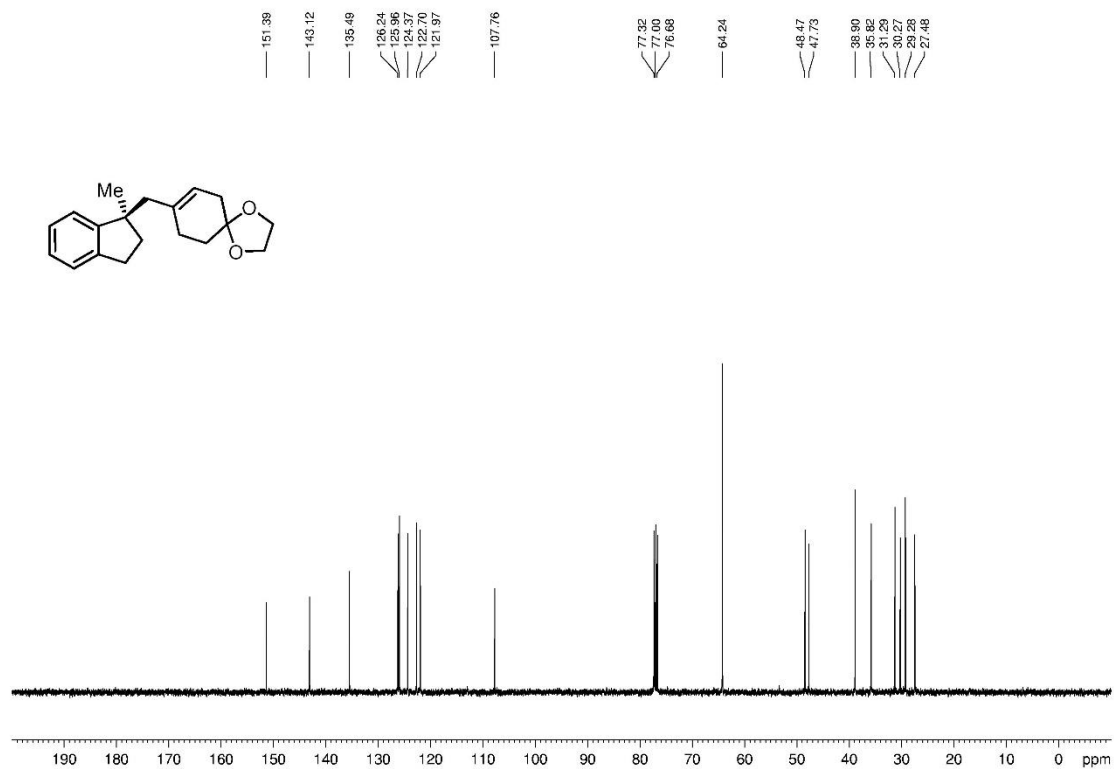

**3aw;  $^1\text{H}$  NMR (400MHz,  $\text{CDCl}_3$ );  $^{13}\text{C}$  NMR (100MHz,  $\text{CDCl}_3$ )**

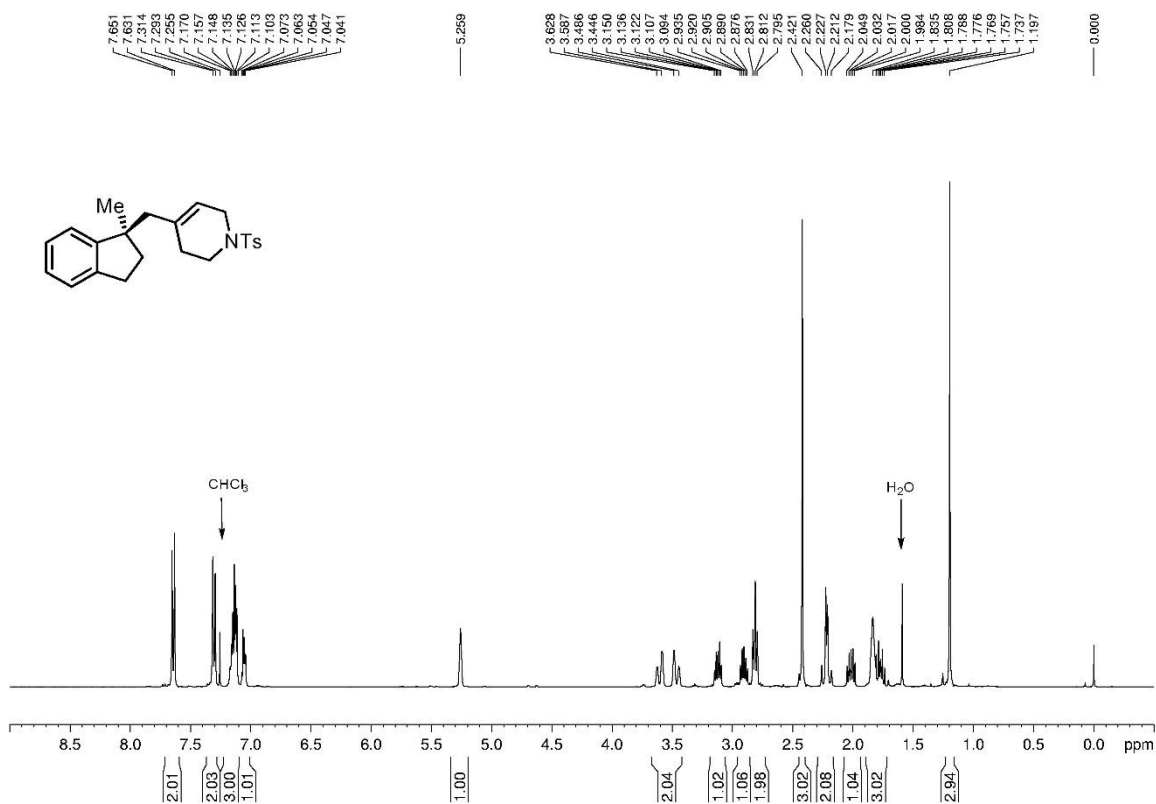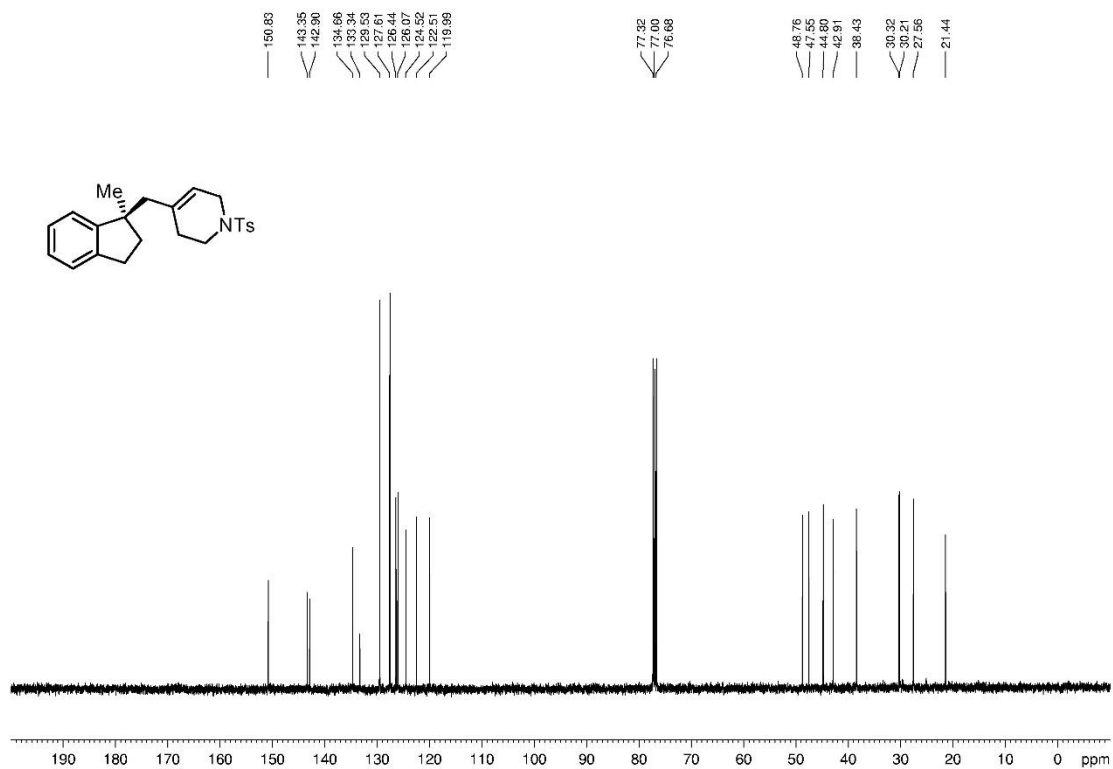

**3ax;  $^1\text{H}$  NMR (400MHz,  $\text{CDCl}_3$ );  $^{13}\text{C}$  NMR (100MHz,  $\text{CDCl}_3$ )**

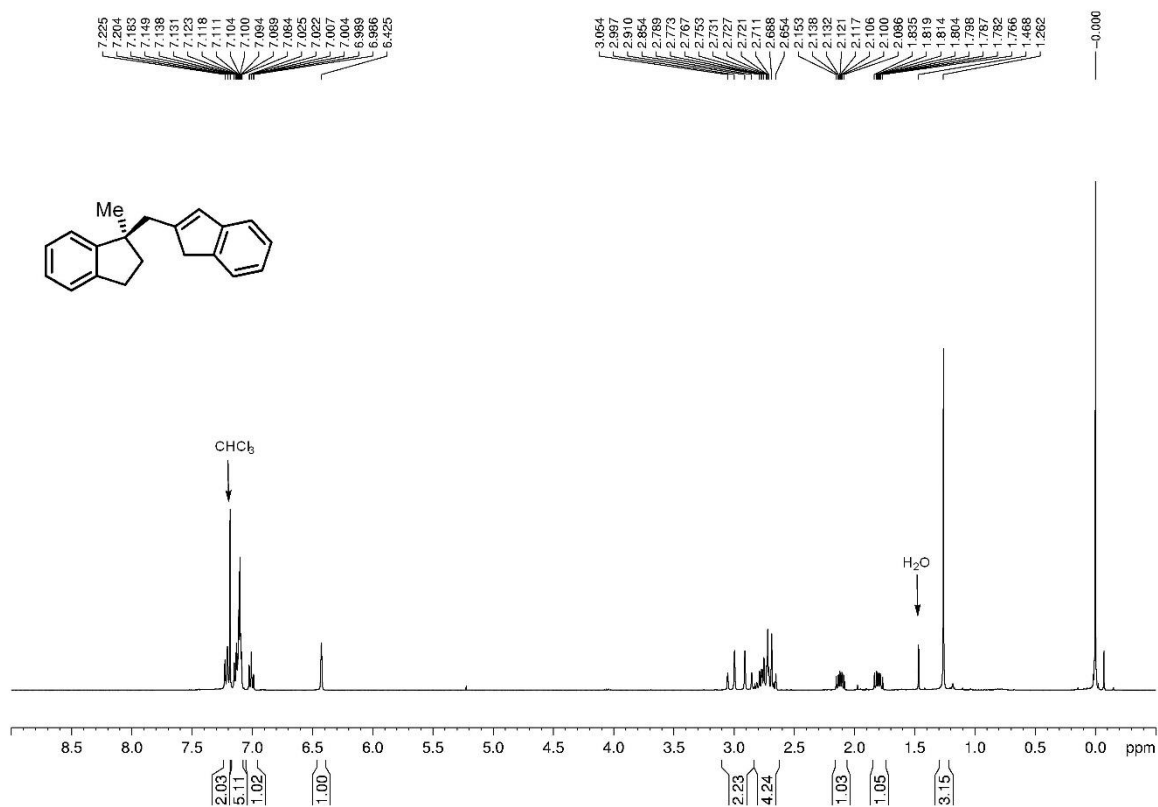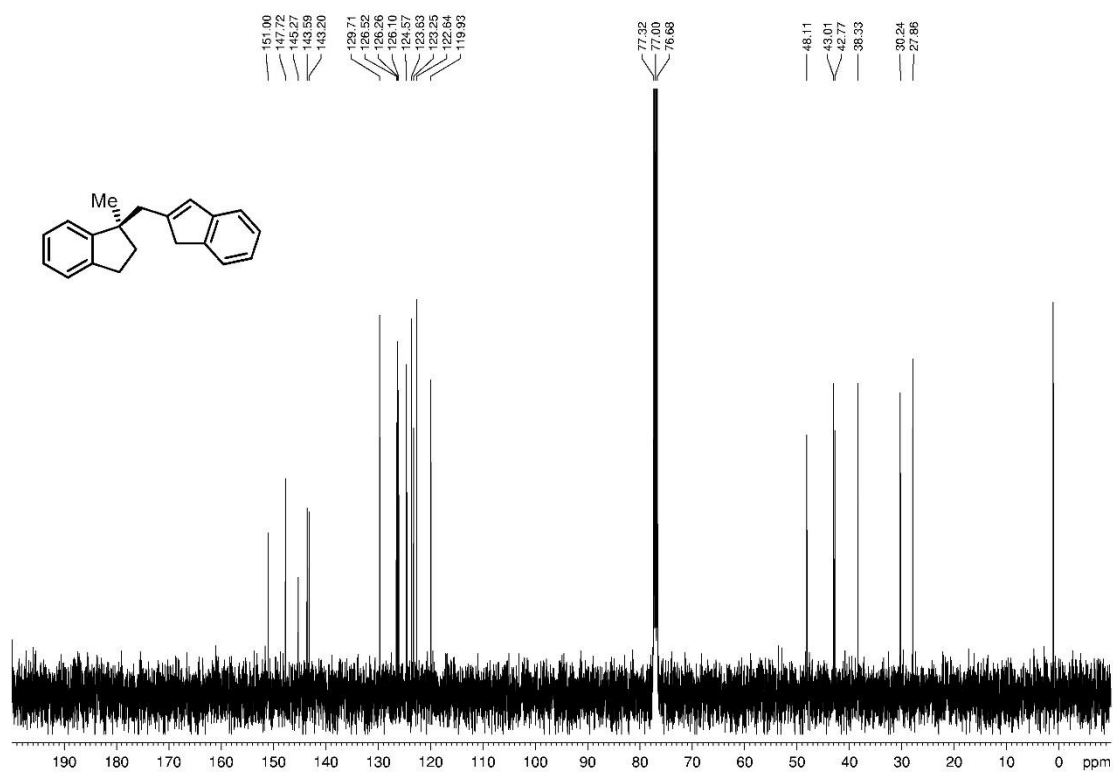

**3ay;  $^1\text{H}$  NMR (400MHz,  $\text{CDCl}_3$ );  $^{13}\text{C}$  NMR (100MHz,  $\text{CDCl}_3$ )**

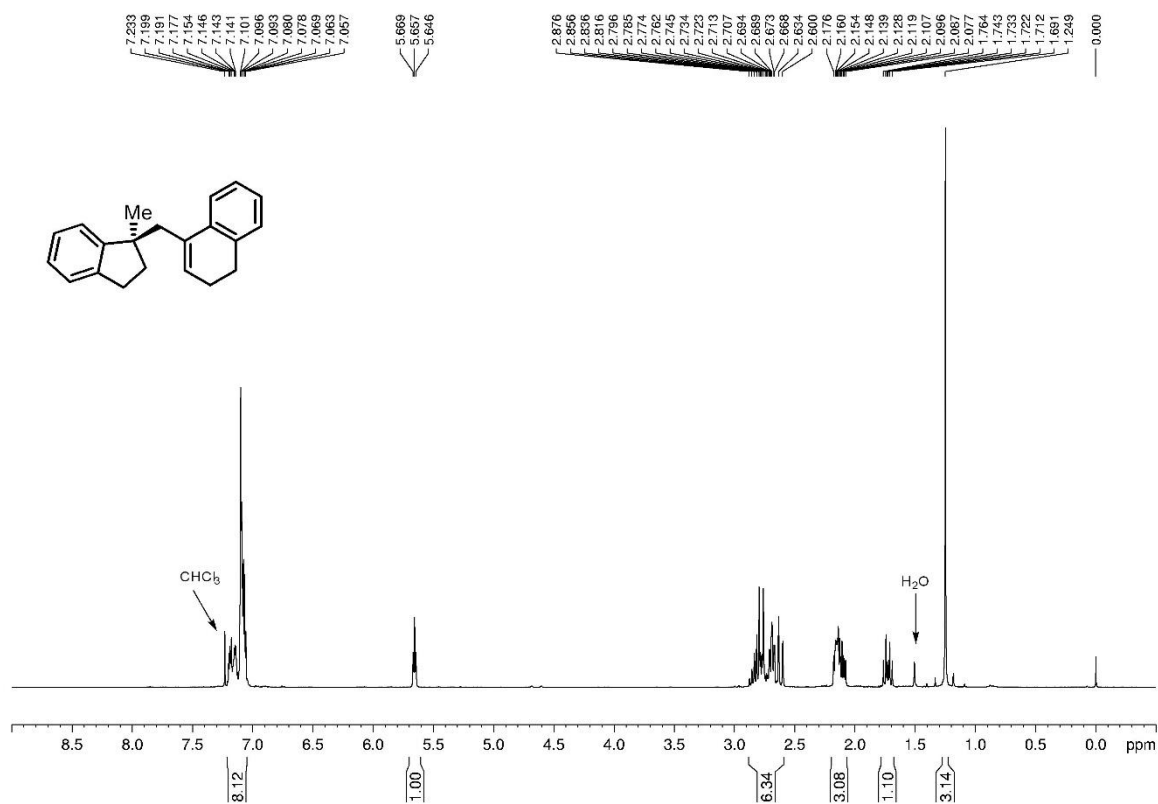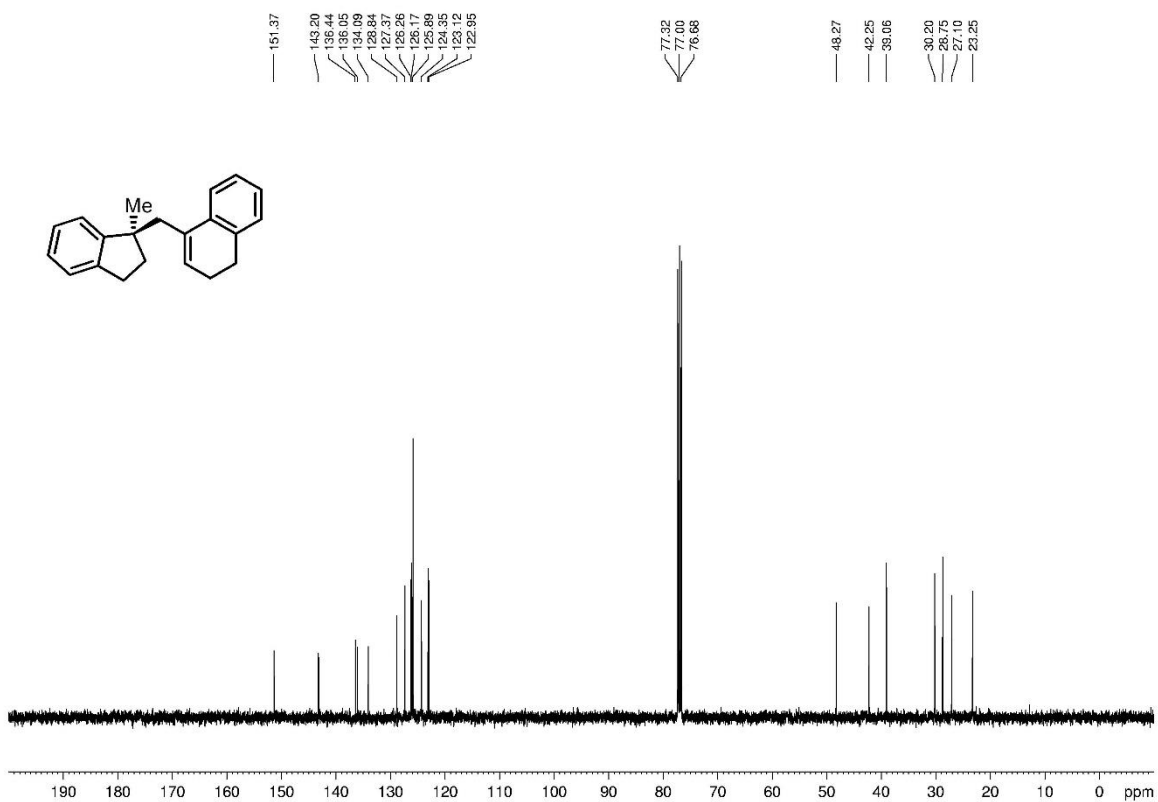

3az;  $^1\text{H}$  NMR (400MHz,  $\text{CDCl}_3$ );  $^{13}\text{C}$  NMR (100MHz,  $\text{CDCl}_3$ )

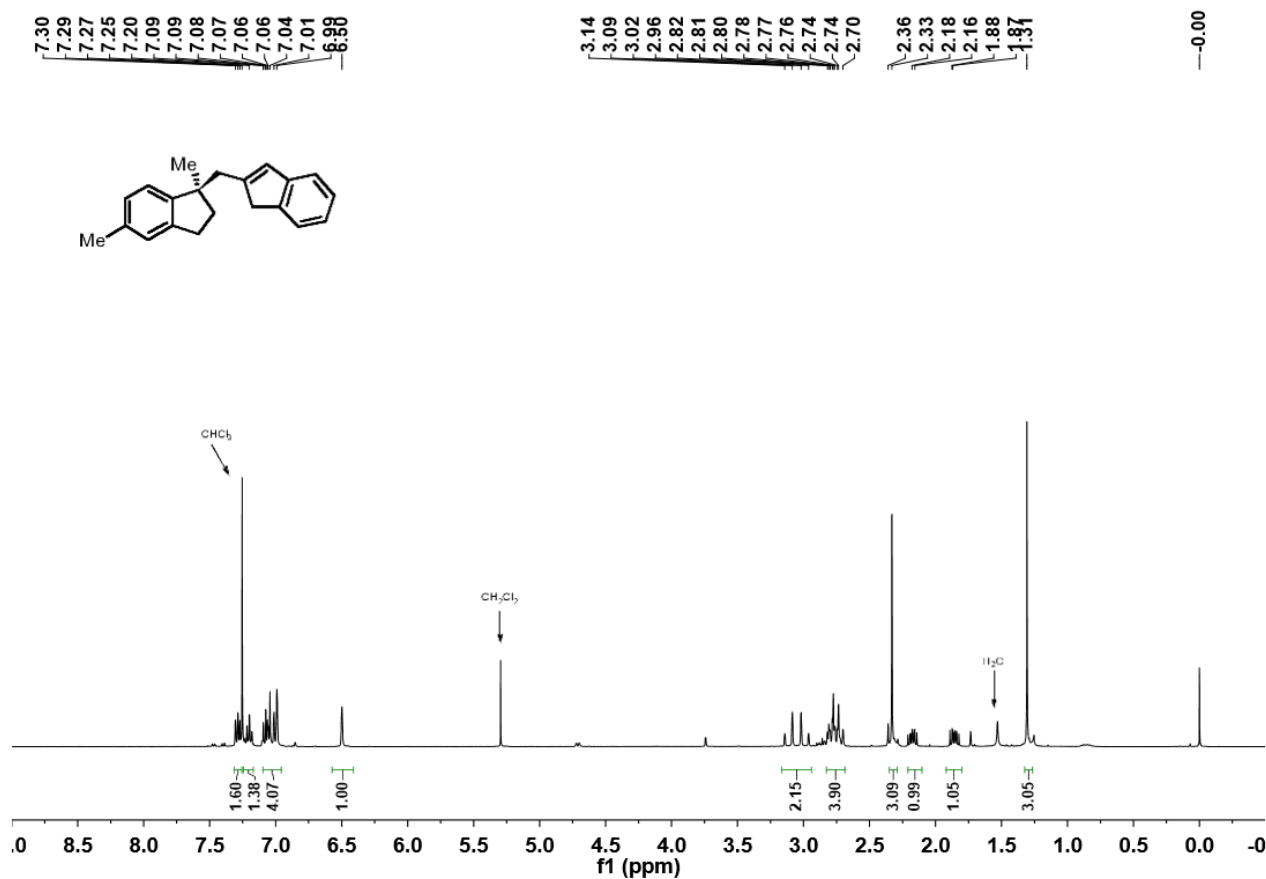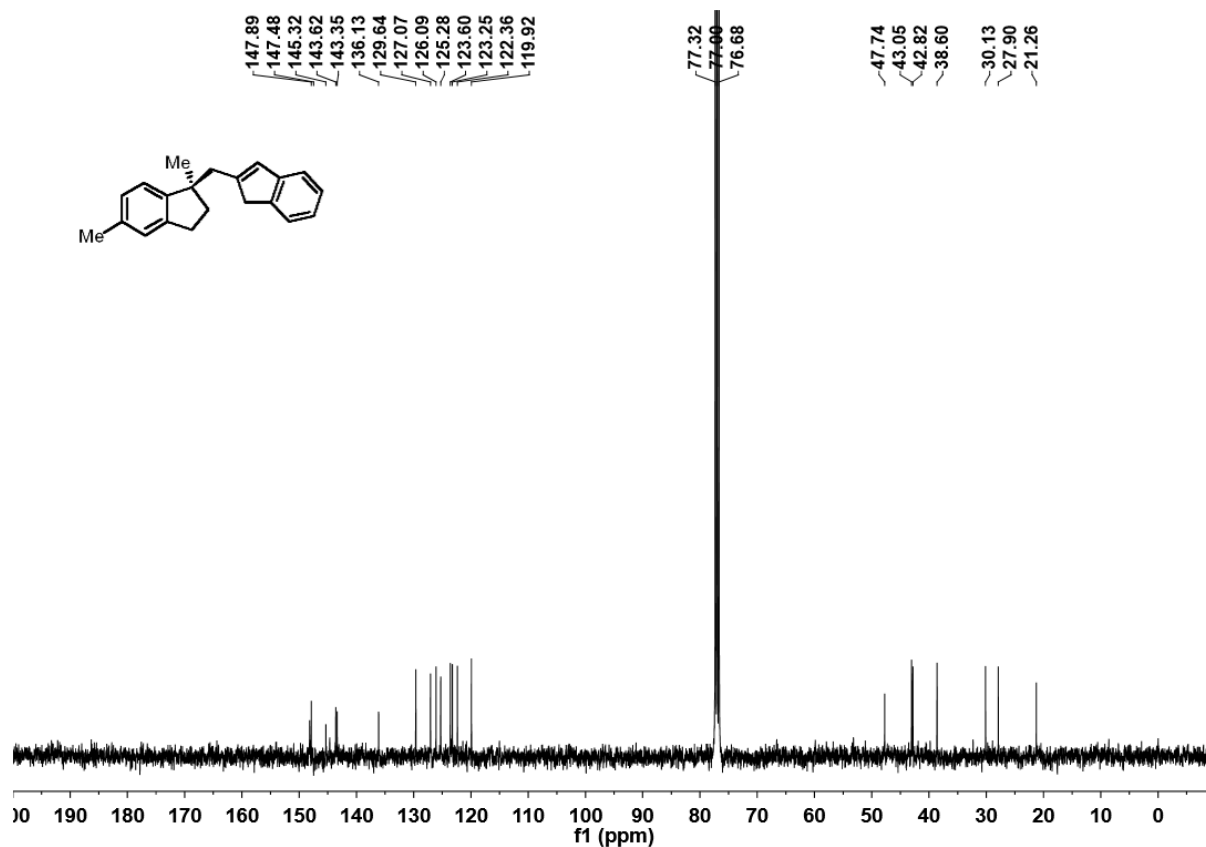



3ba;  $^1\text{H}$  NMR (400MHz,  $\text{CDCl}_3$ );  $^{13}\text{C}$  NMR (100MHz,  $\text{CDCl}_3$ )

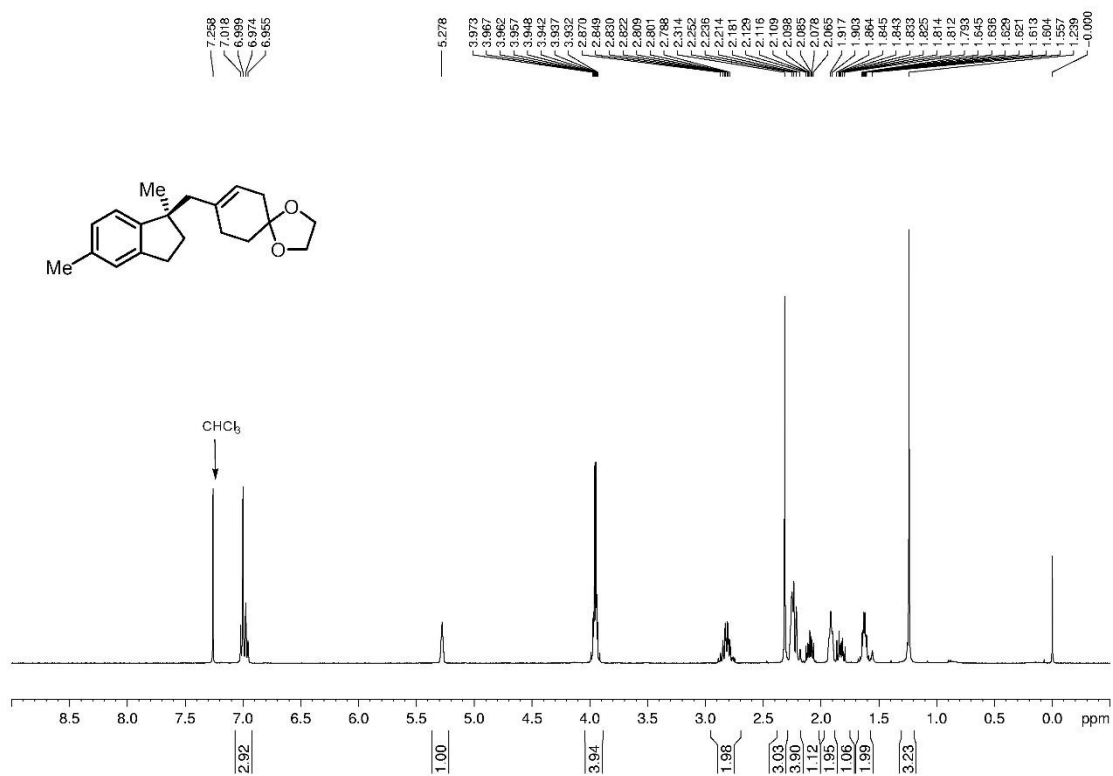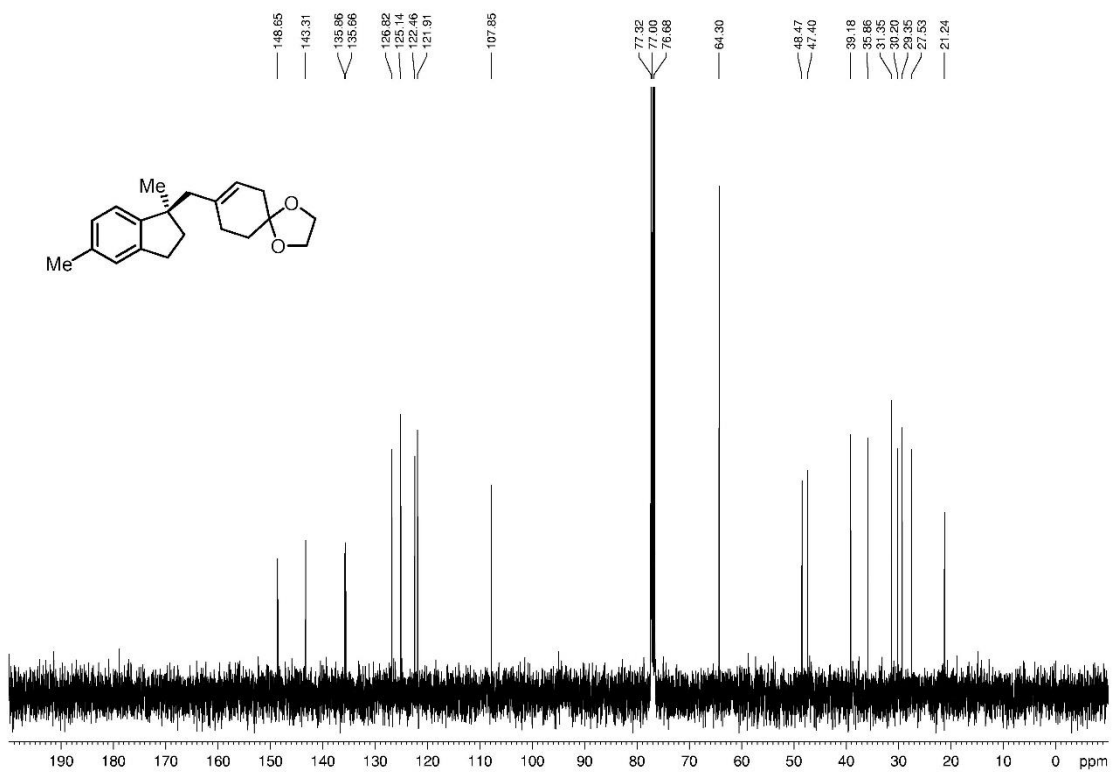

**3bb;  $^1\text{H}$  NMR (400MHz,  $\text{CDCl}_3$ );  $^{13}\text{C}$  NMR (100MHz,  $\text{CDCl}_3$ )**

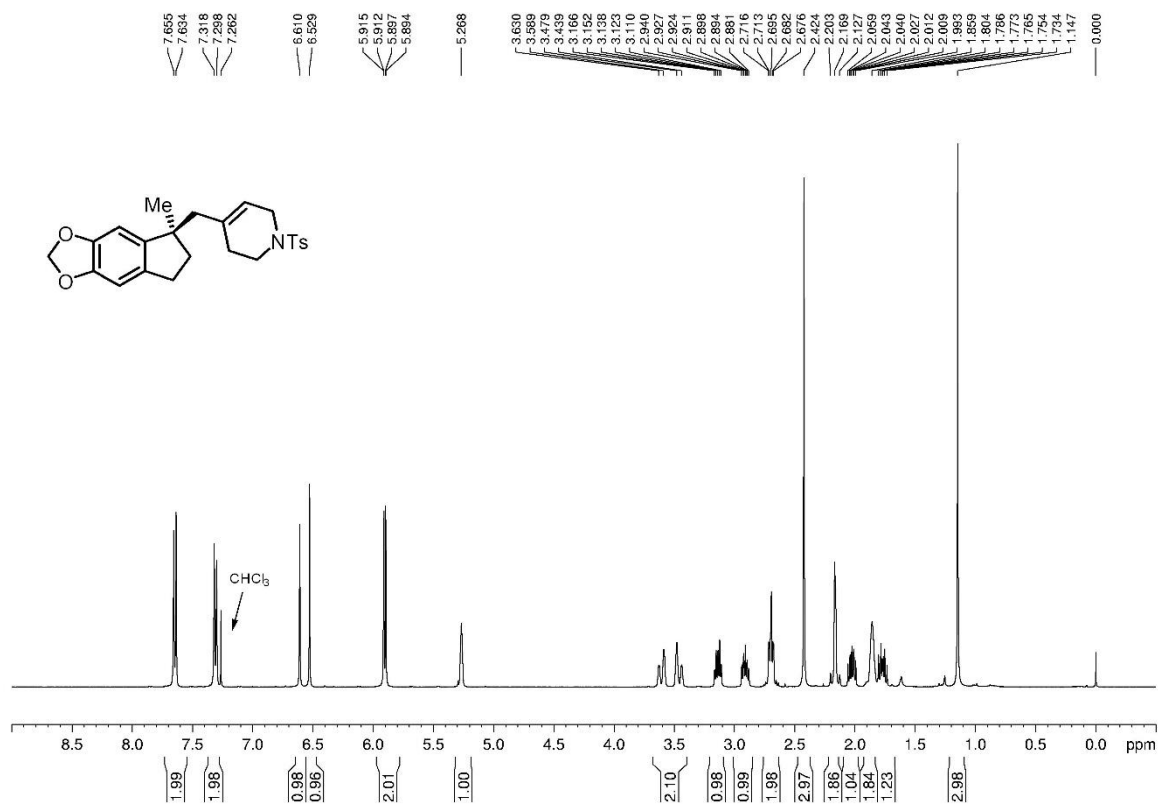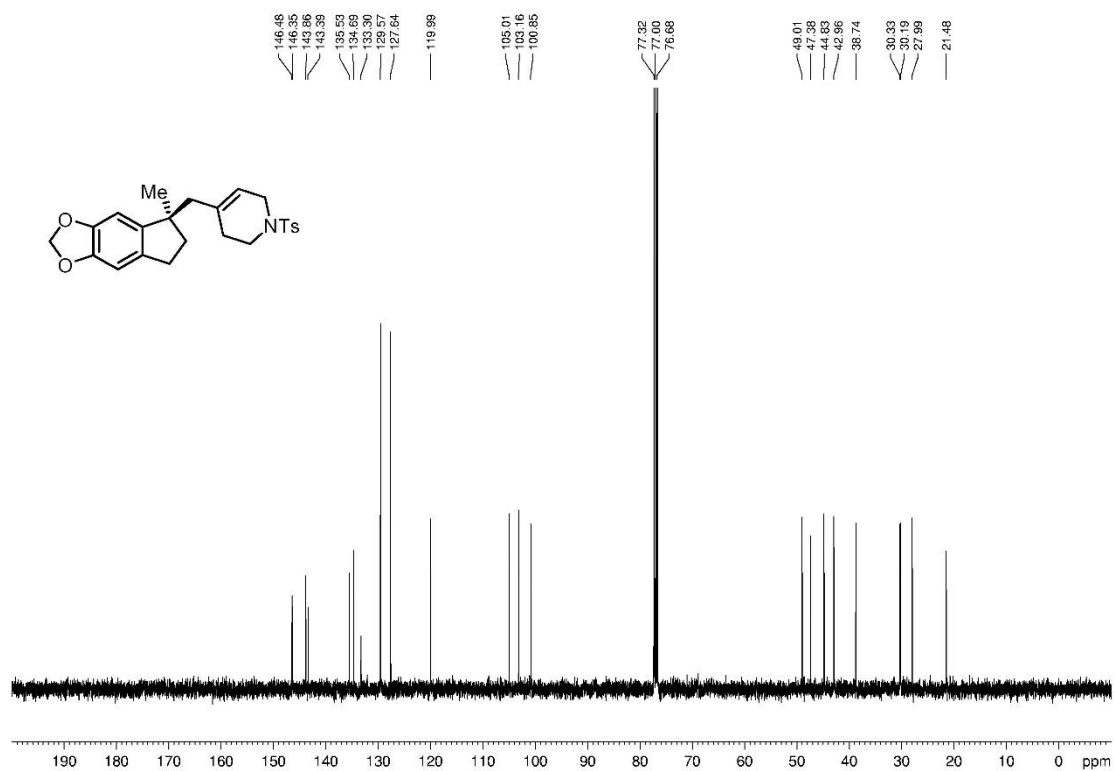

3bc;  $^1\text{H}$  NMR (400MHz,  $\text{CDCl}_3$ );  $^{13}\text{C}$  NMR (100MHz,  $\text{CDCl}_3$ )

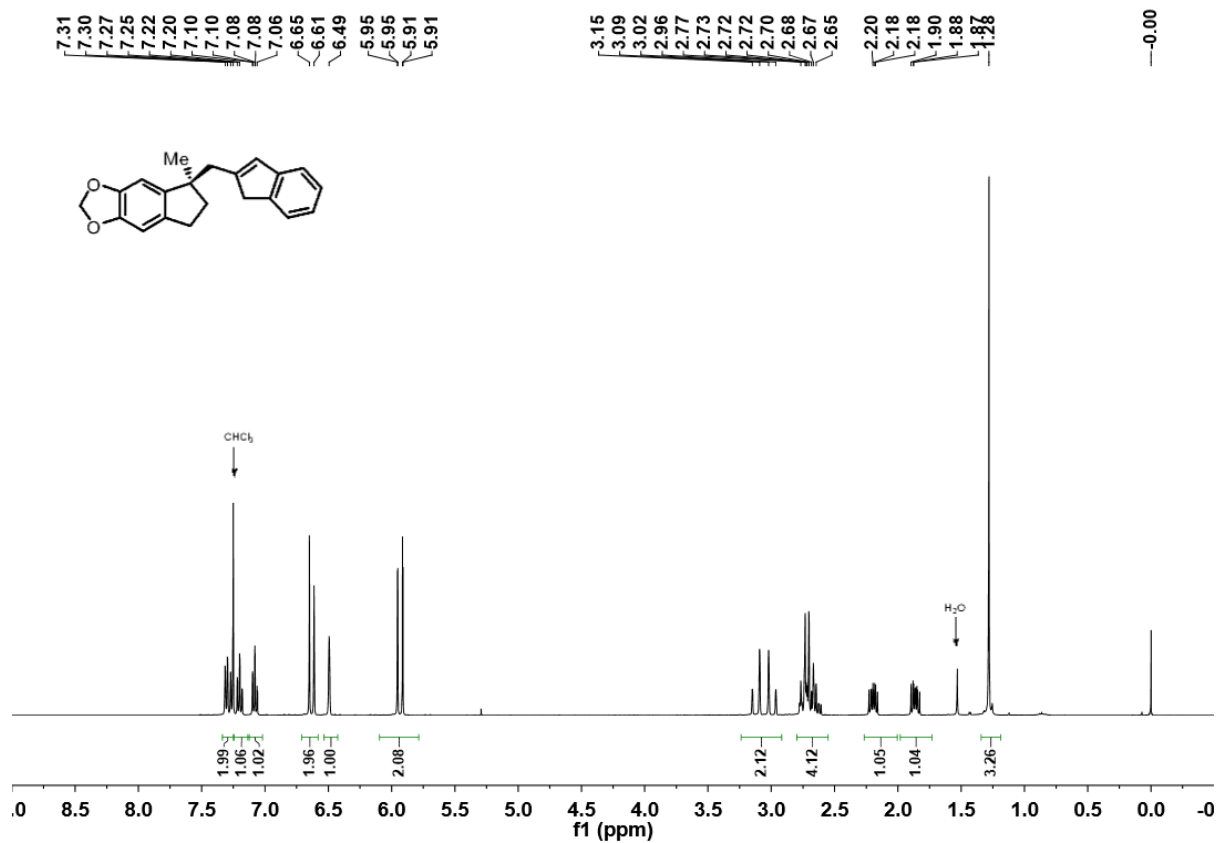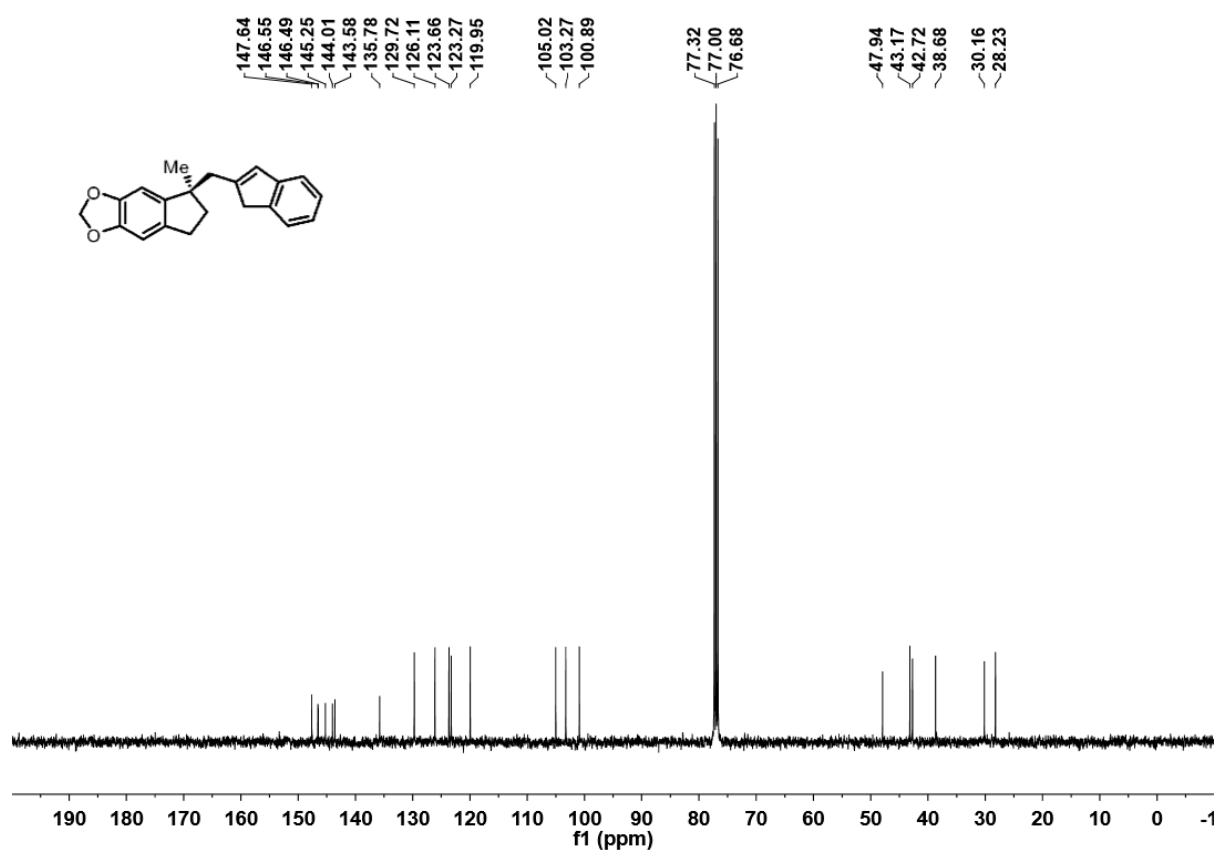

**4; <sup>1</sup>H NMR (400MHz, CDCl<sub>3</sub>); <sup>13</sup>C NMR (100MHz, CDCl<sub>3</sub>)**

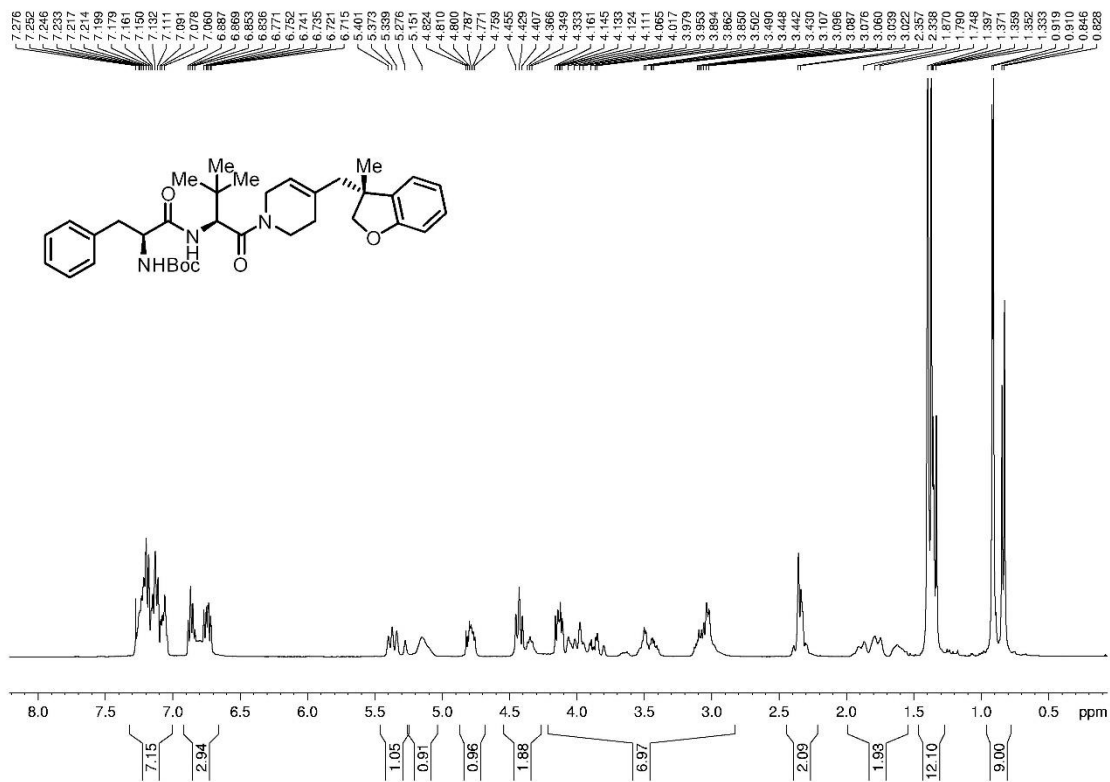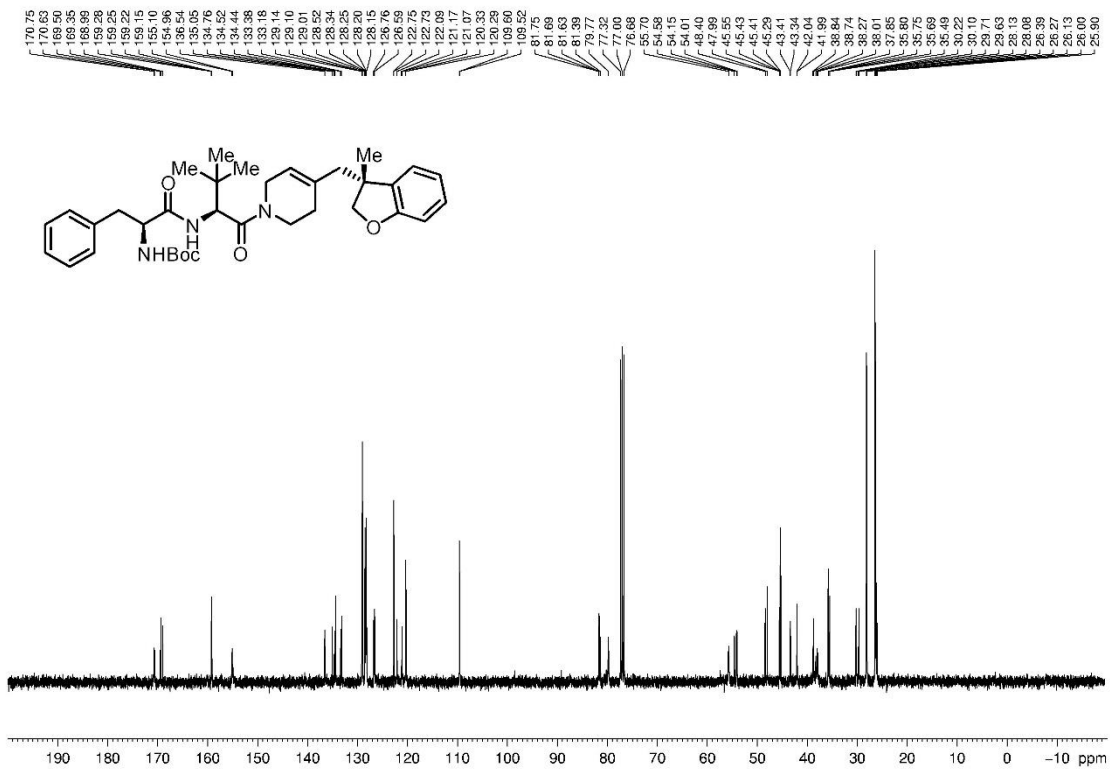

5;  $^1\text{H}$  NMR (400MHz,  $\text{CDCl}_3$ );  $^{13}\text{C}$  NMR (100MHz,  $\text{CDCl}_3$ )

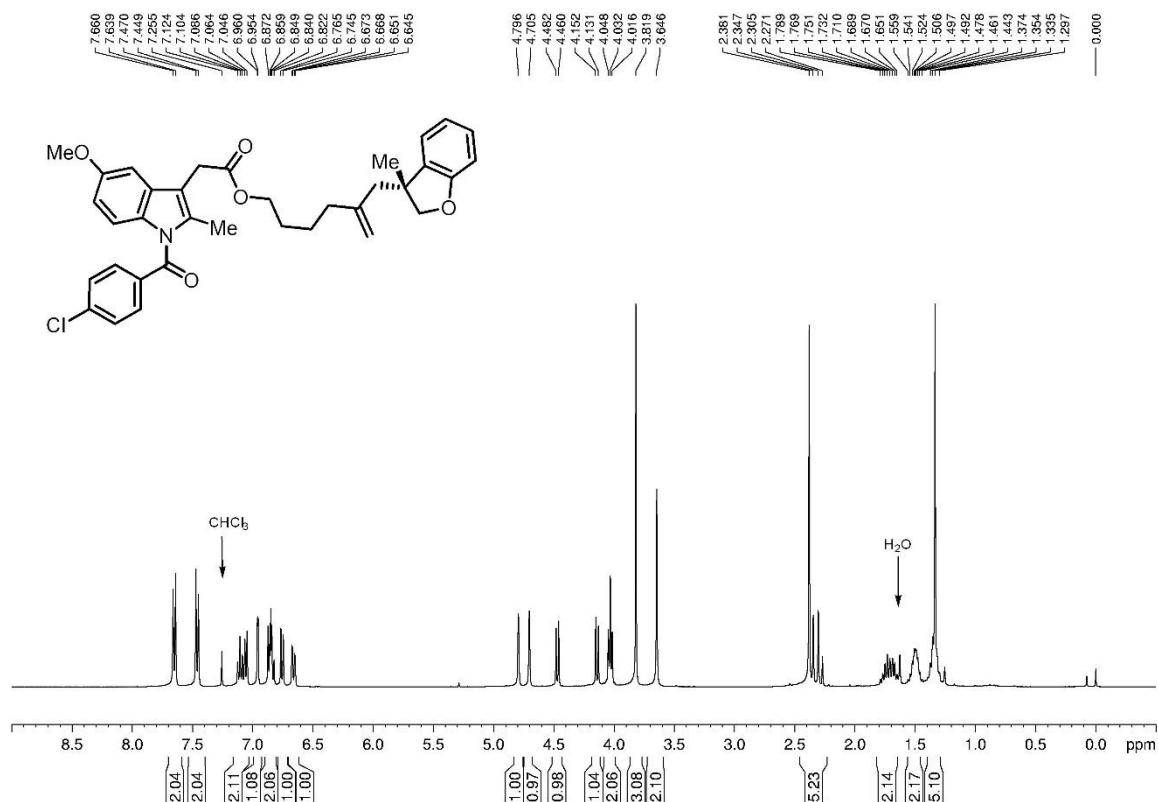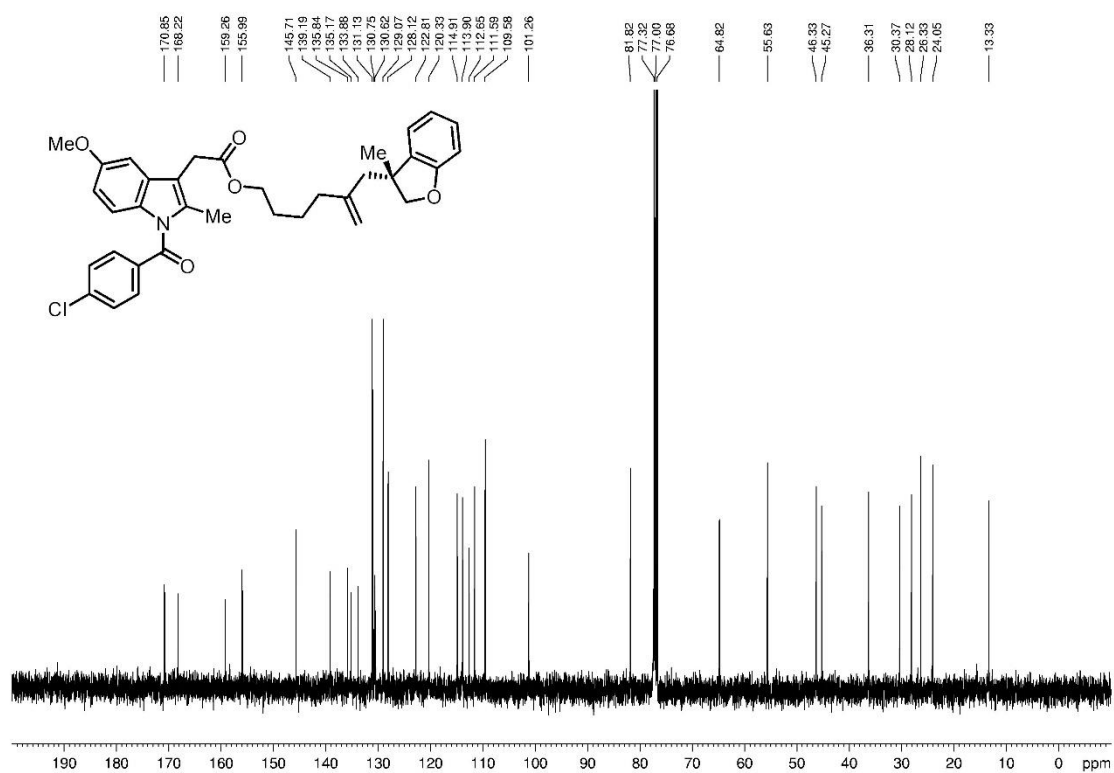

**6;  $^1\text{H}$  NMR (400MHz,  $\text{CDCl}_3$ );  $^{13}\text{C}$  NMR (100MHz,  $\text{CDCl}_3$ )**

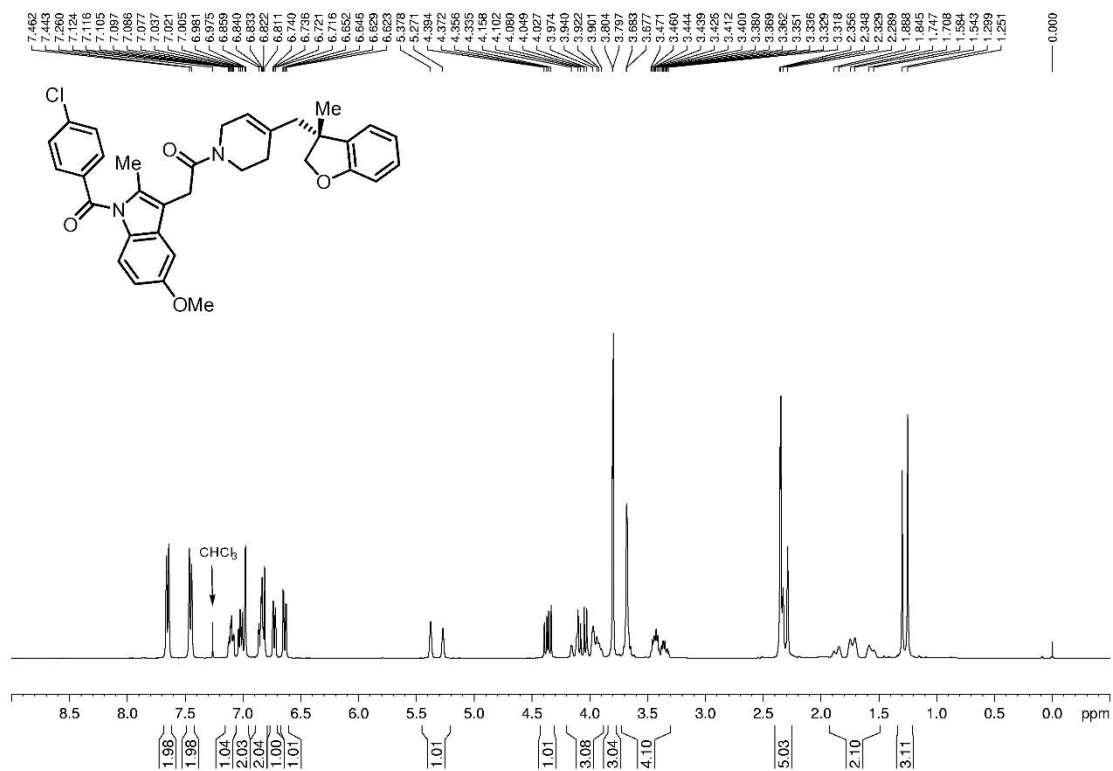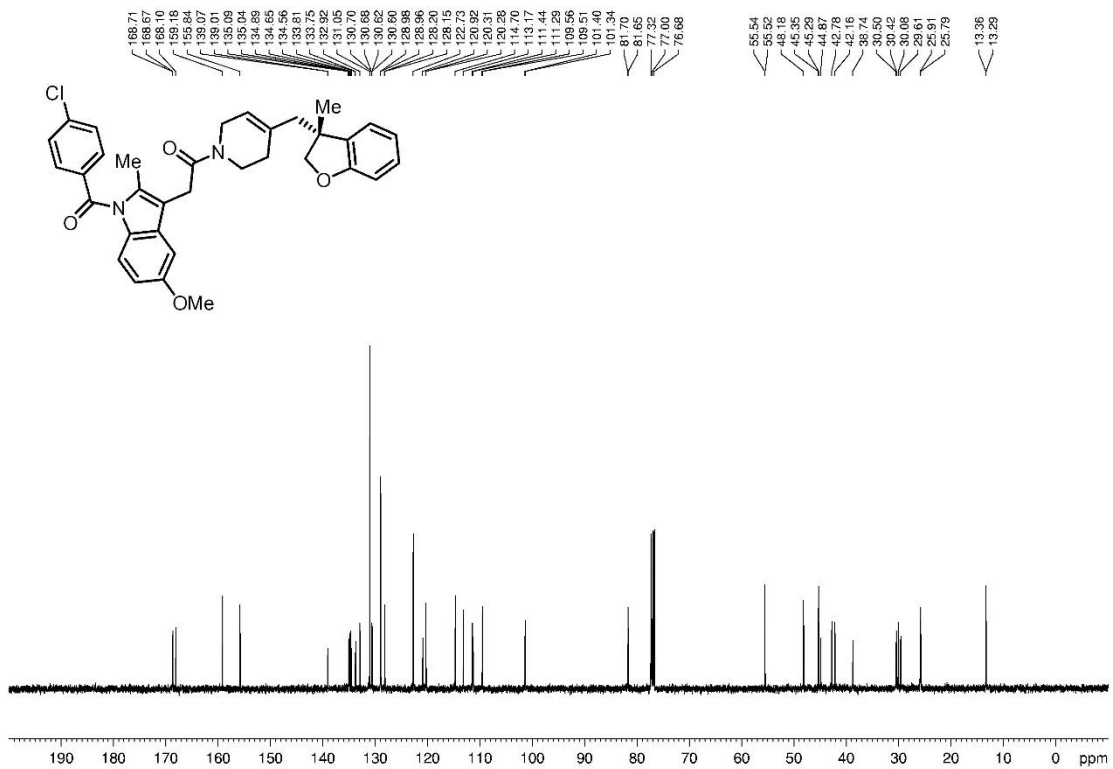

7;  $^1\text{H}$  NMR (400MHz,  $\text{CDCl}_3$ );  $^{13}\text{C}$  NMR (100MHz,  $\text{CDCl}_3$ )

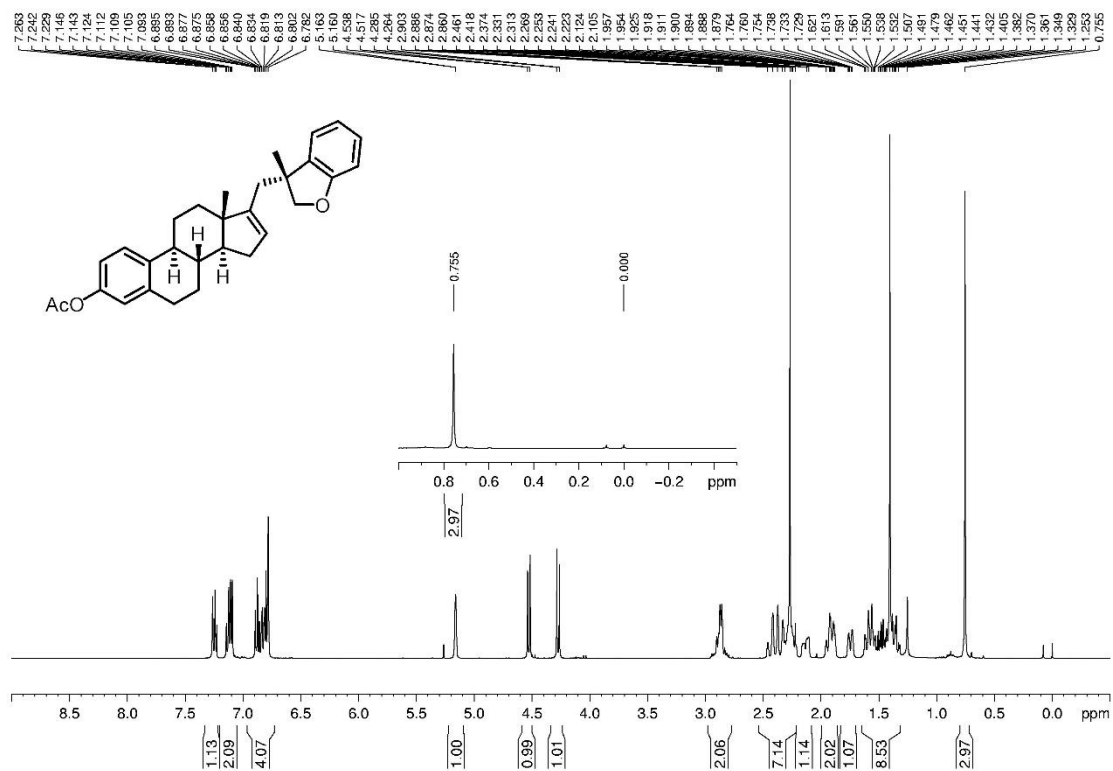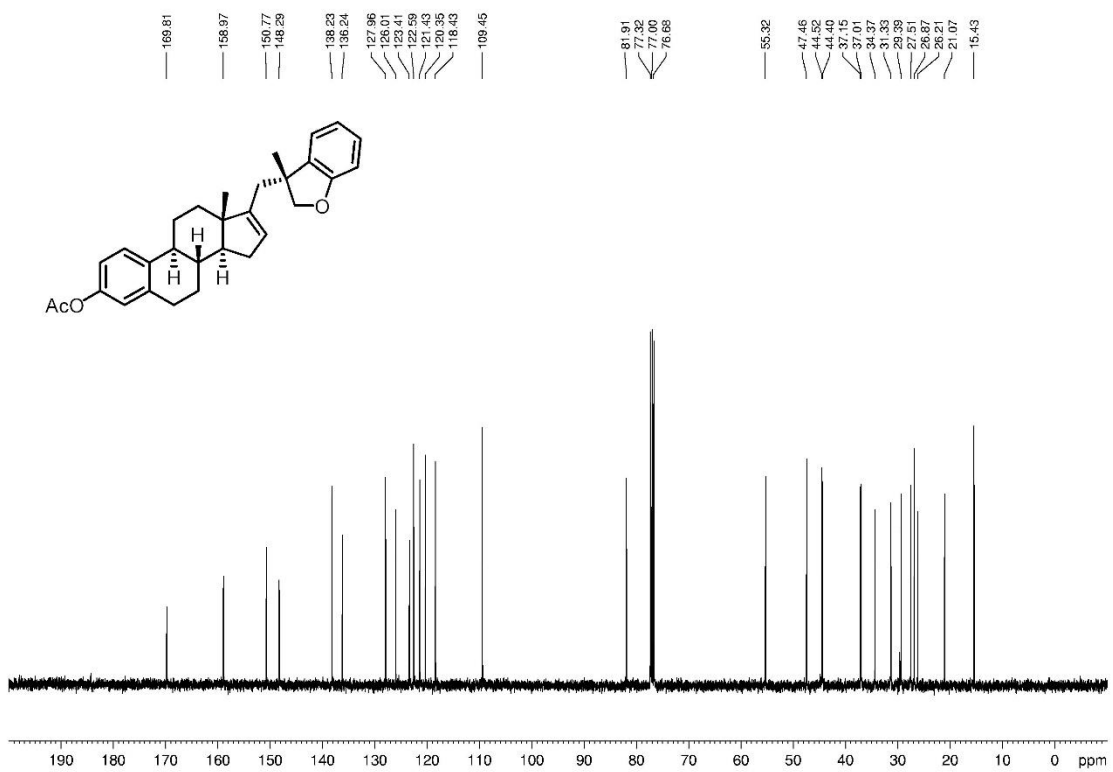

8;  $^1\text{H}$  NMR (400MHz,  $\text{CDCl}_3$ );  $^{13}\text{C}$  NMR (100MHz,  $\text{CDCl}_3$ )

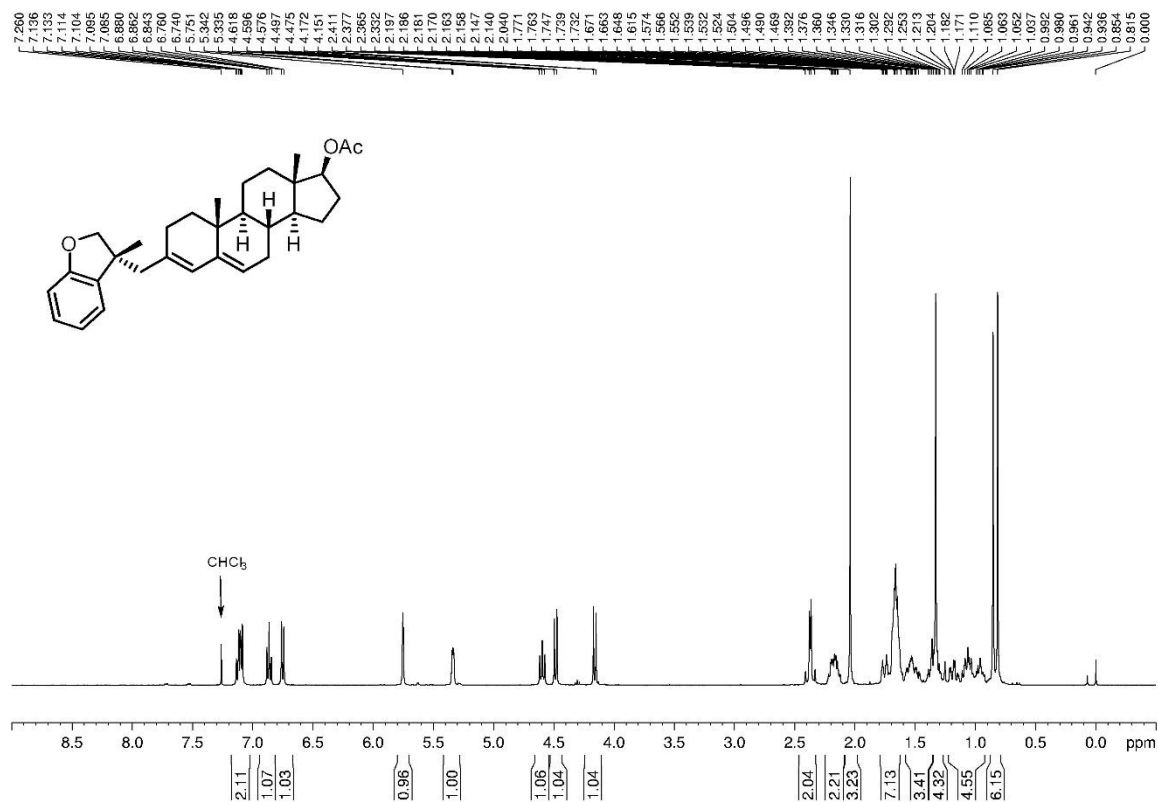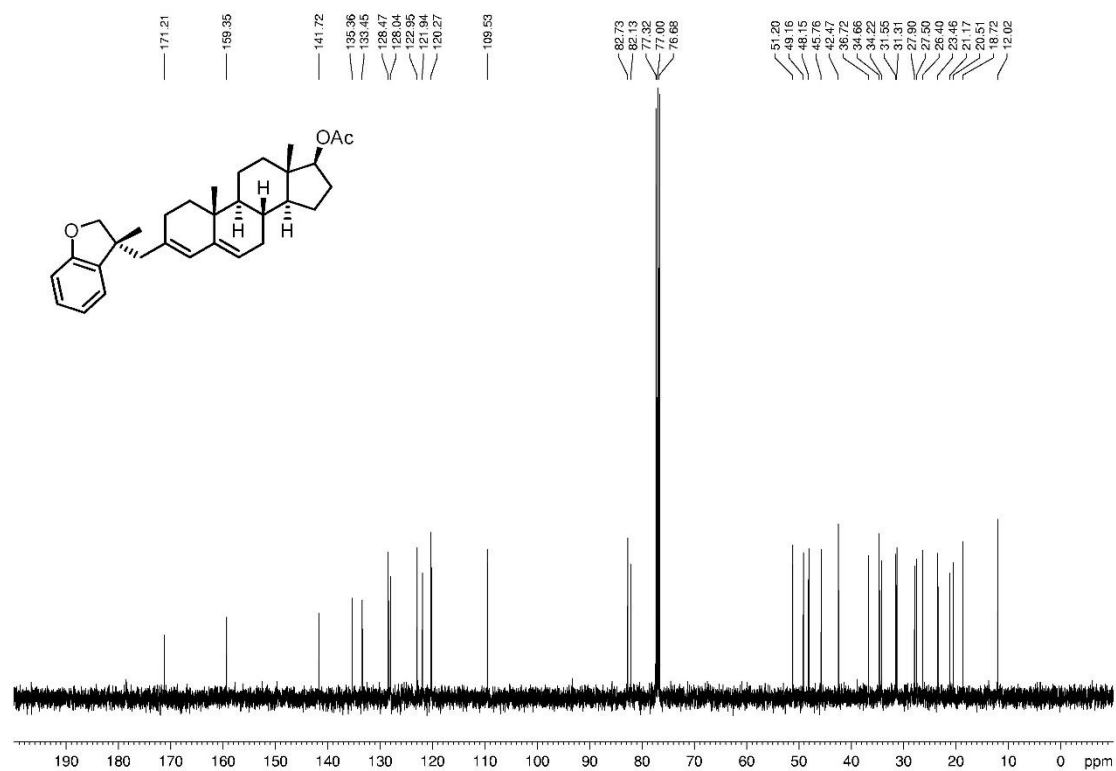

Supplement: Supplementary file 1 [file 14986457]
